# Supplementary material for: Genome-wide study for circulating metabolites identifies 62 loci and reveals novel systemic effects of LPA
Source: PubMed Central journal article supplement (PMC4814583; doi:10.1038/ncomms11122), 2016-03-23
Supplement: ncomms11122-s1.pdf [file ncomms11122-s1.pdf]

Supplementary Figure 1. Regional Manhattan plots for all 62 lead loci. Annotation key for the symbols is presented below. Correlation structure with the lead variant is presented as sliding color and key is present in all figures. Correlation structure could not be calculated for insertions/deletions and therefore those figures contain only grey symbols.

annotation key

|                |   |
|----------------|---|
| framestop      | ▲ |
| splice         | ▲ |
| nonsyn         | ▼ |
| coding         | ■ |
| utr            | ■ |
| tfbscons       | * |
| mcs44placental | ⊠ |
| no annotation  | ● |
| none           | ○ |

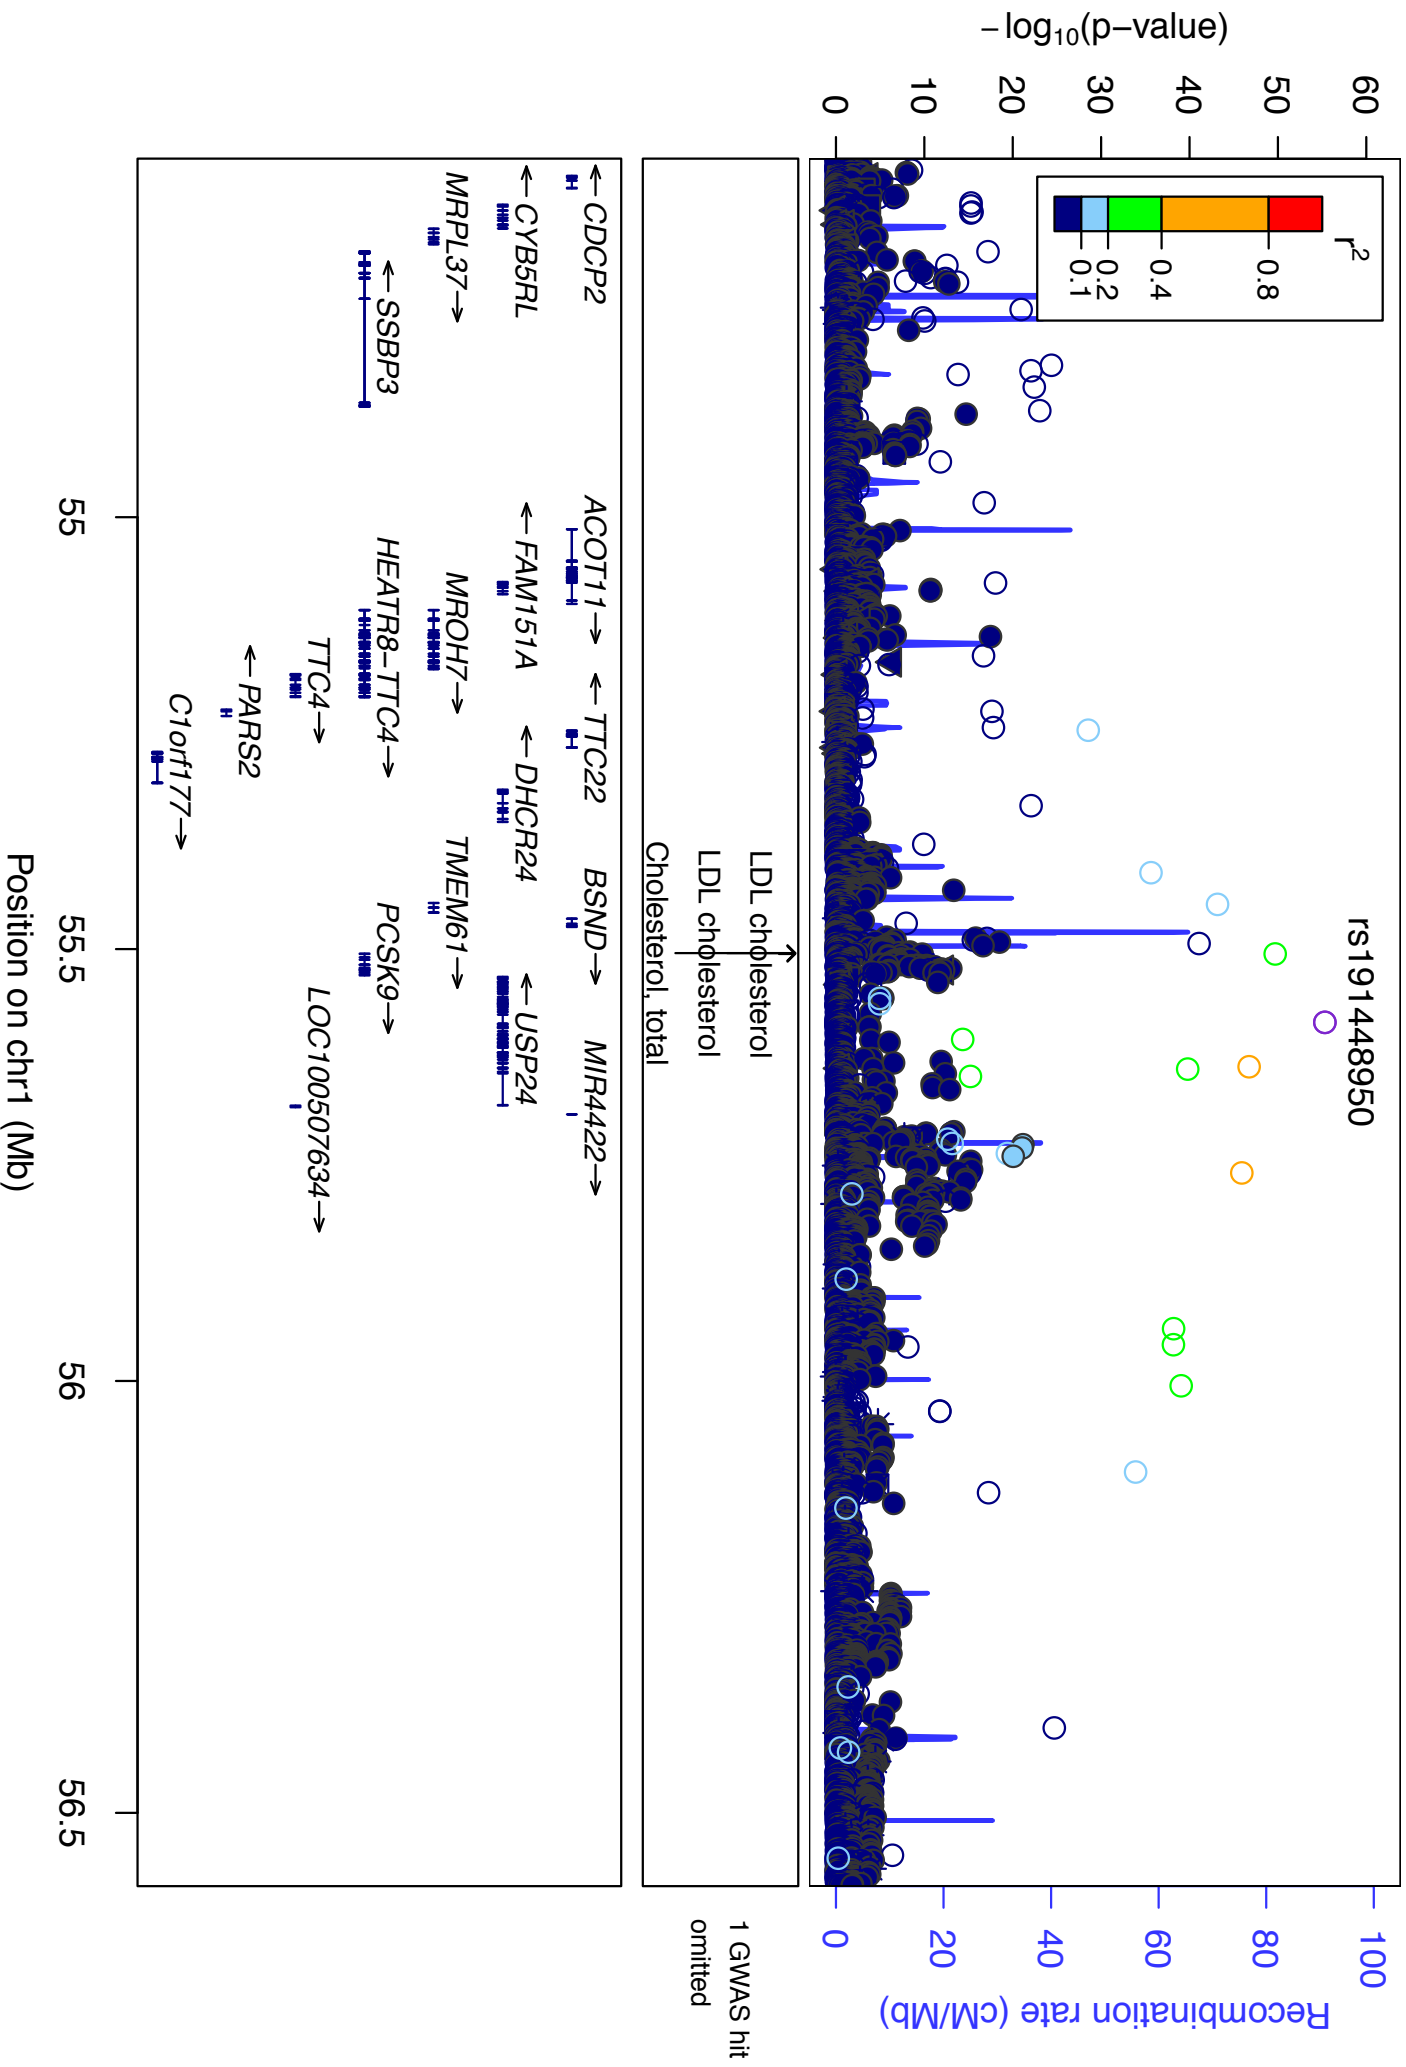

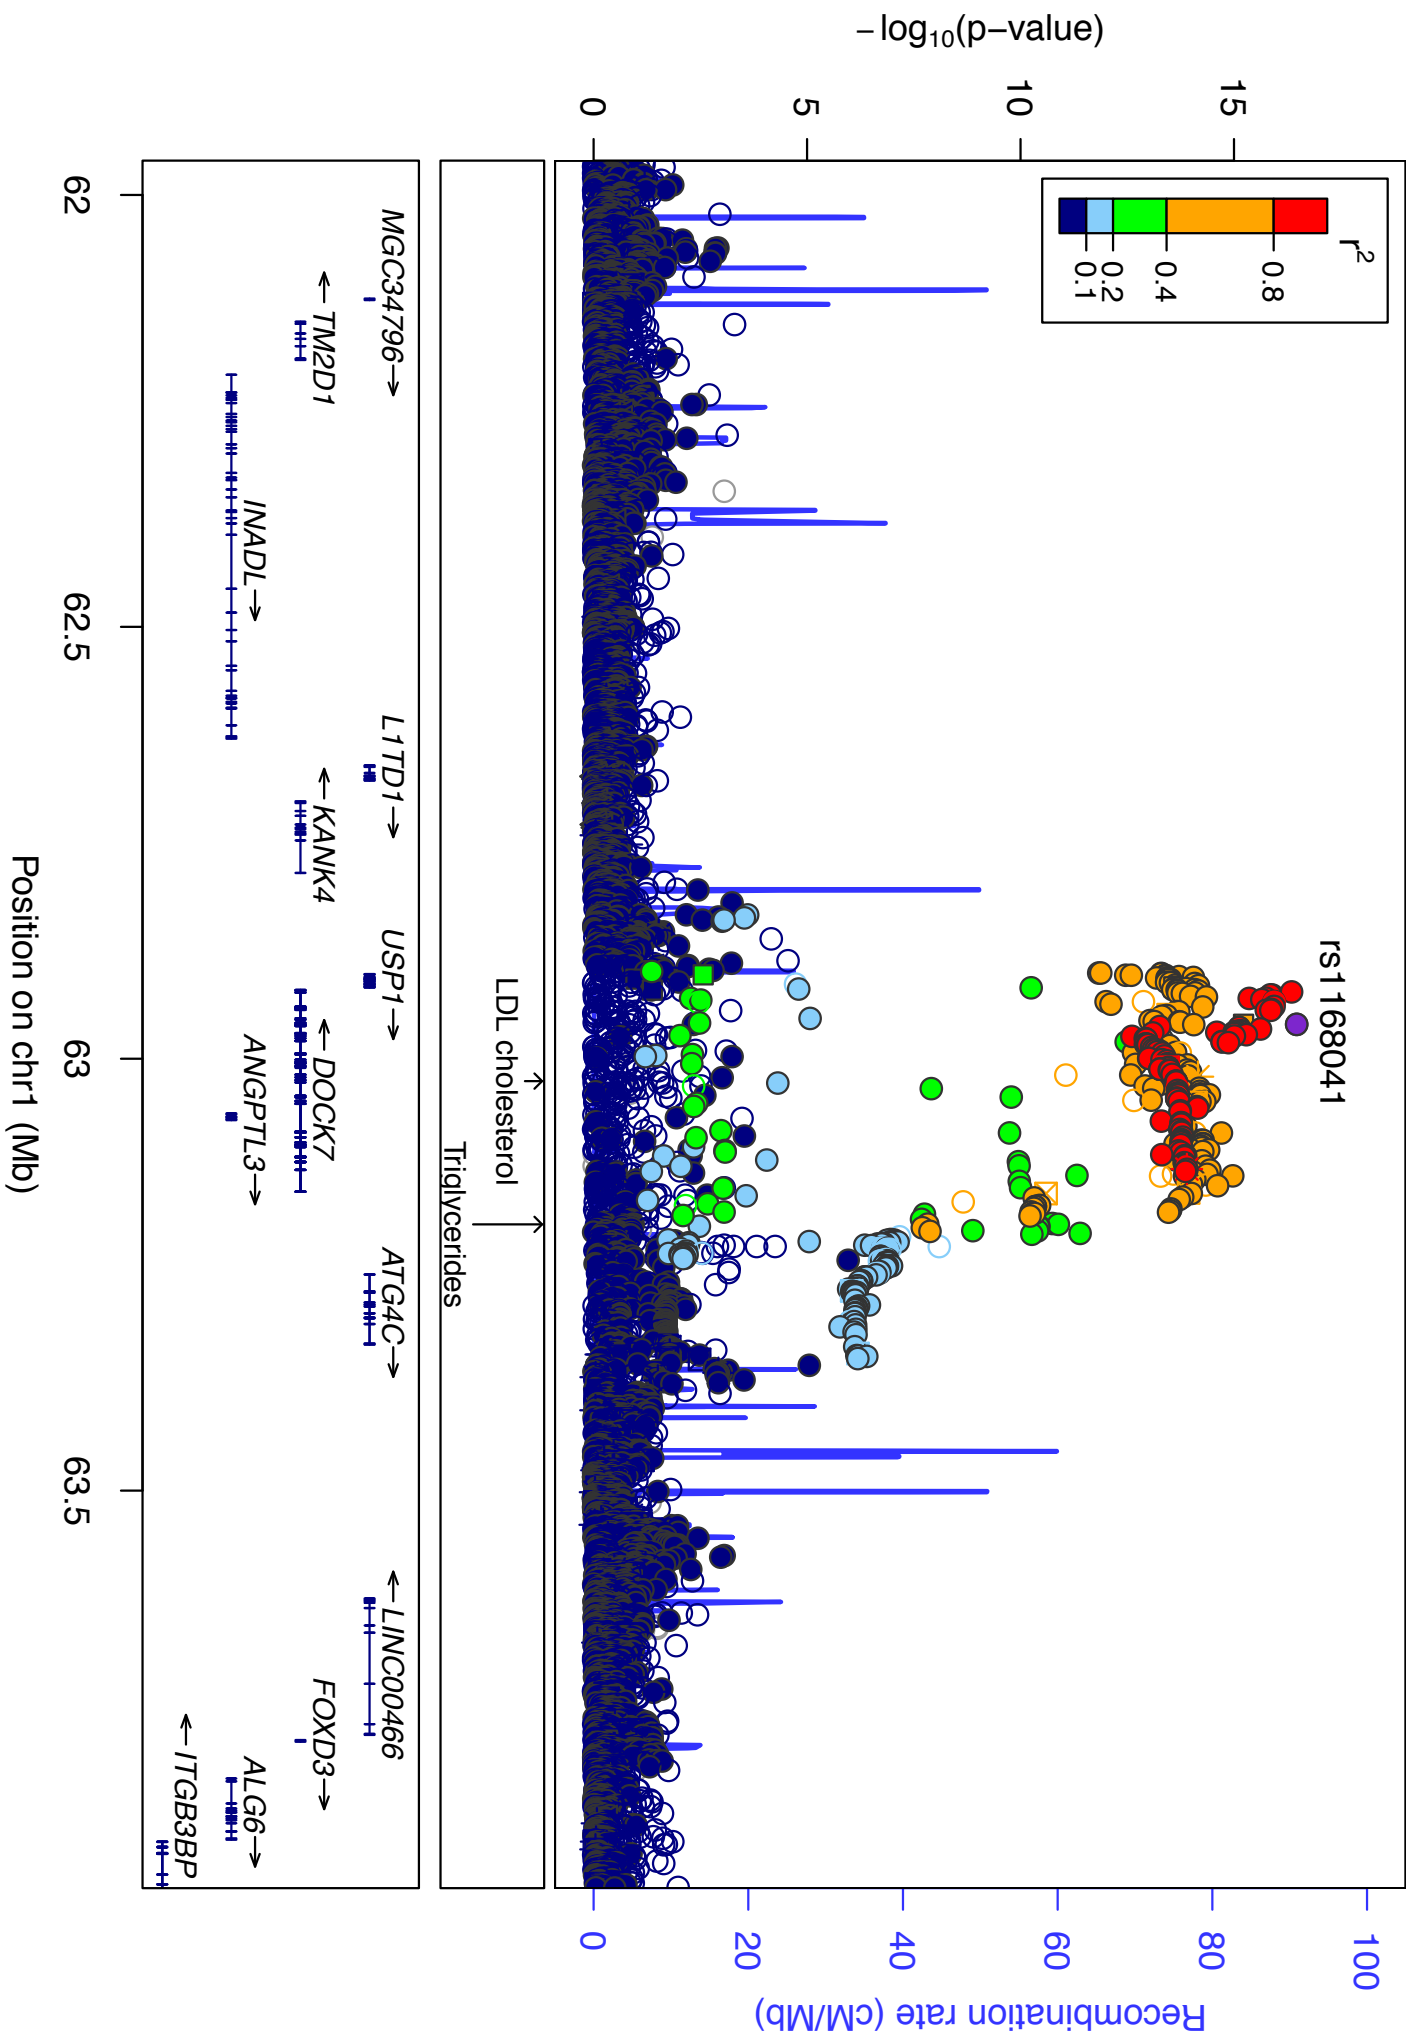

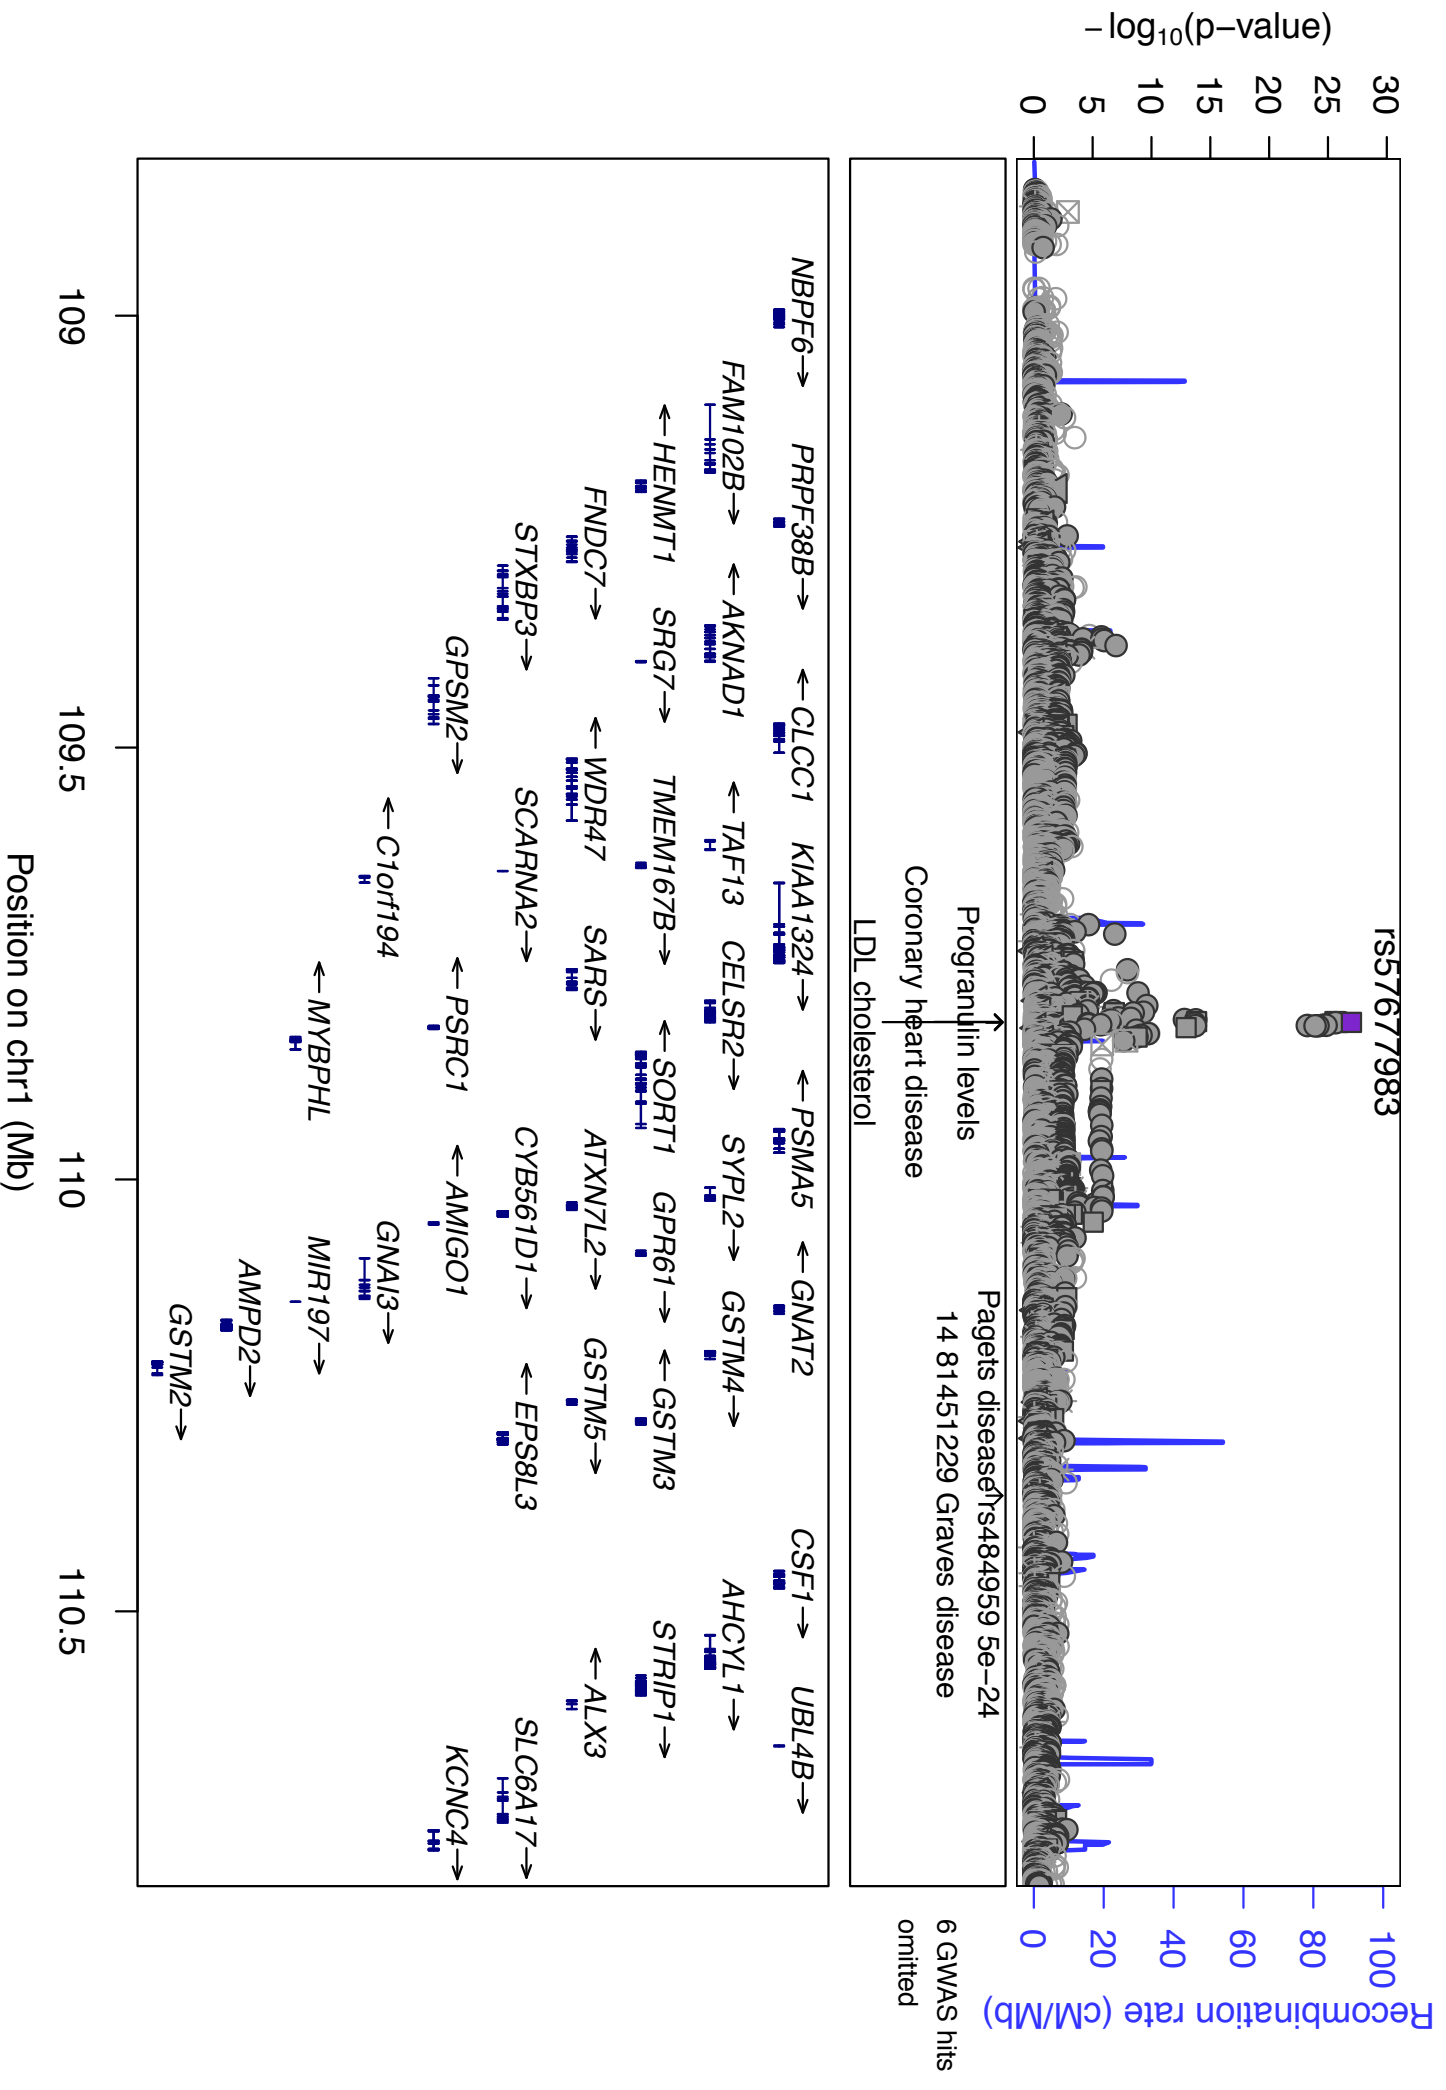

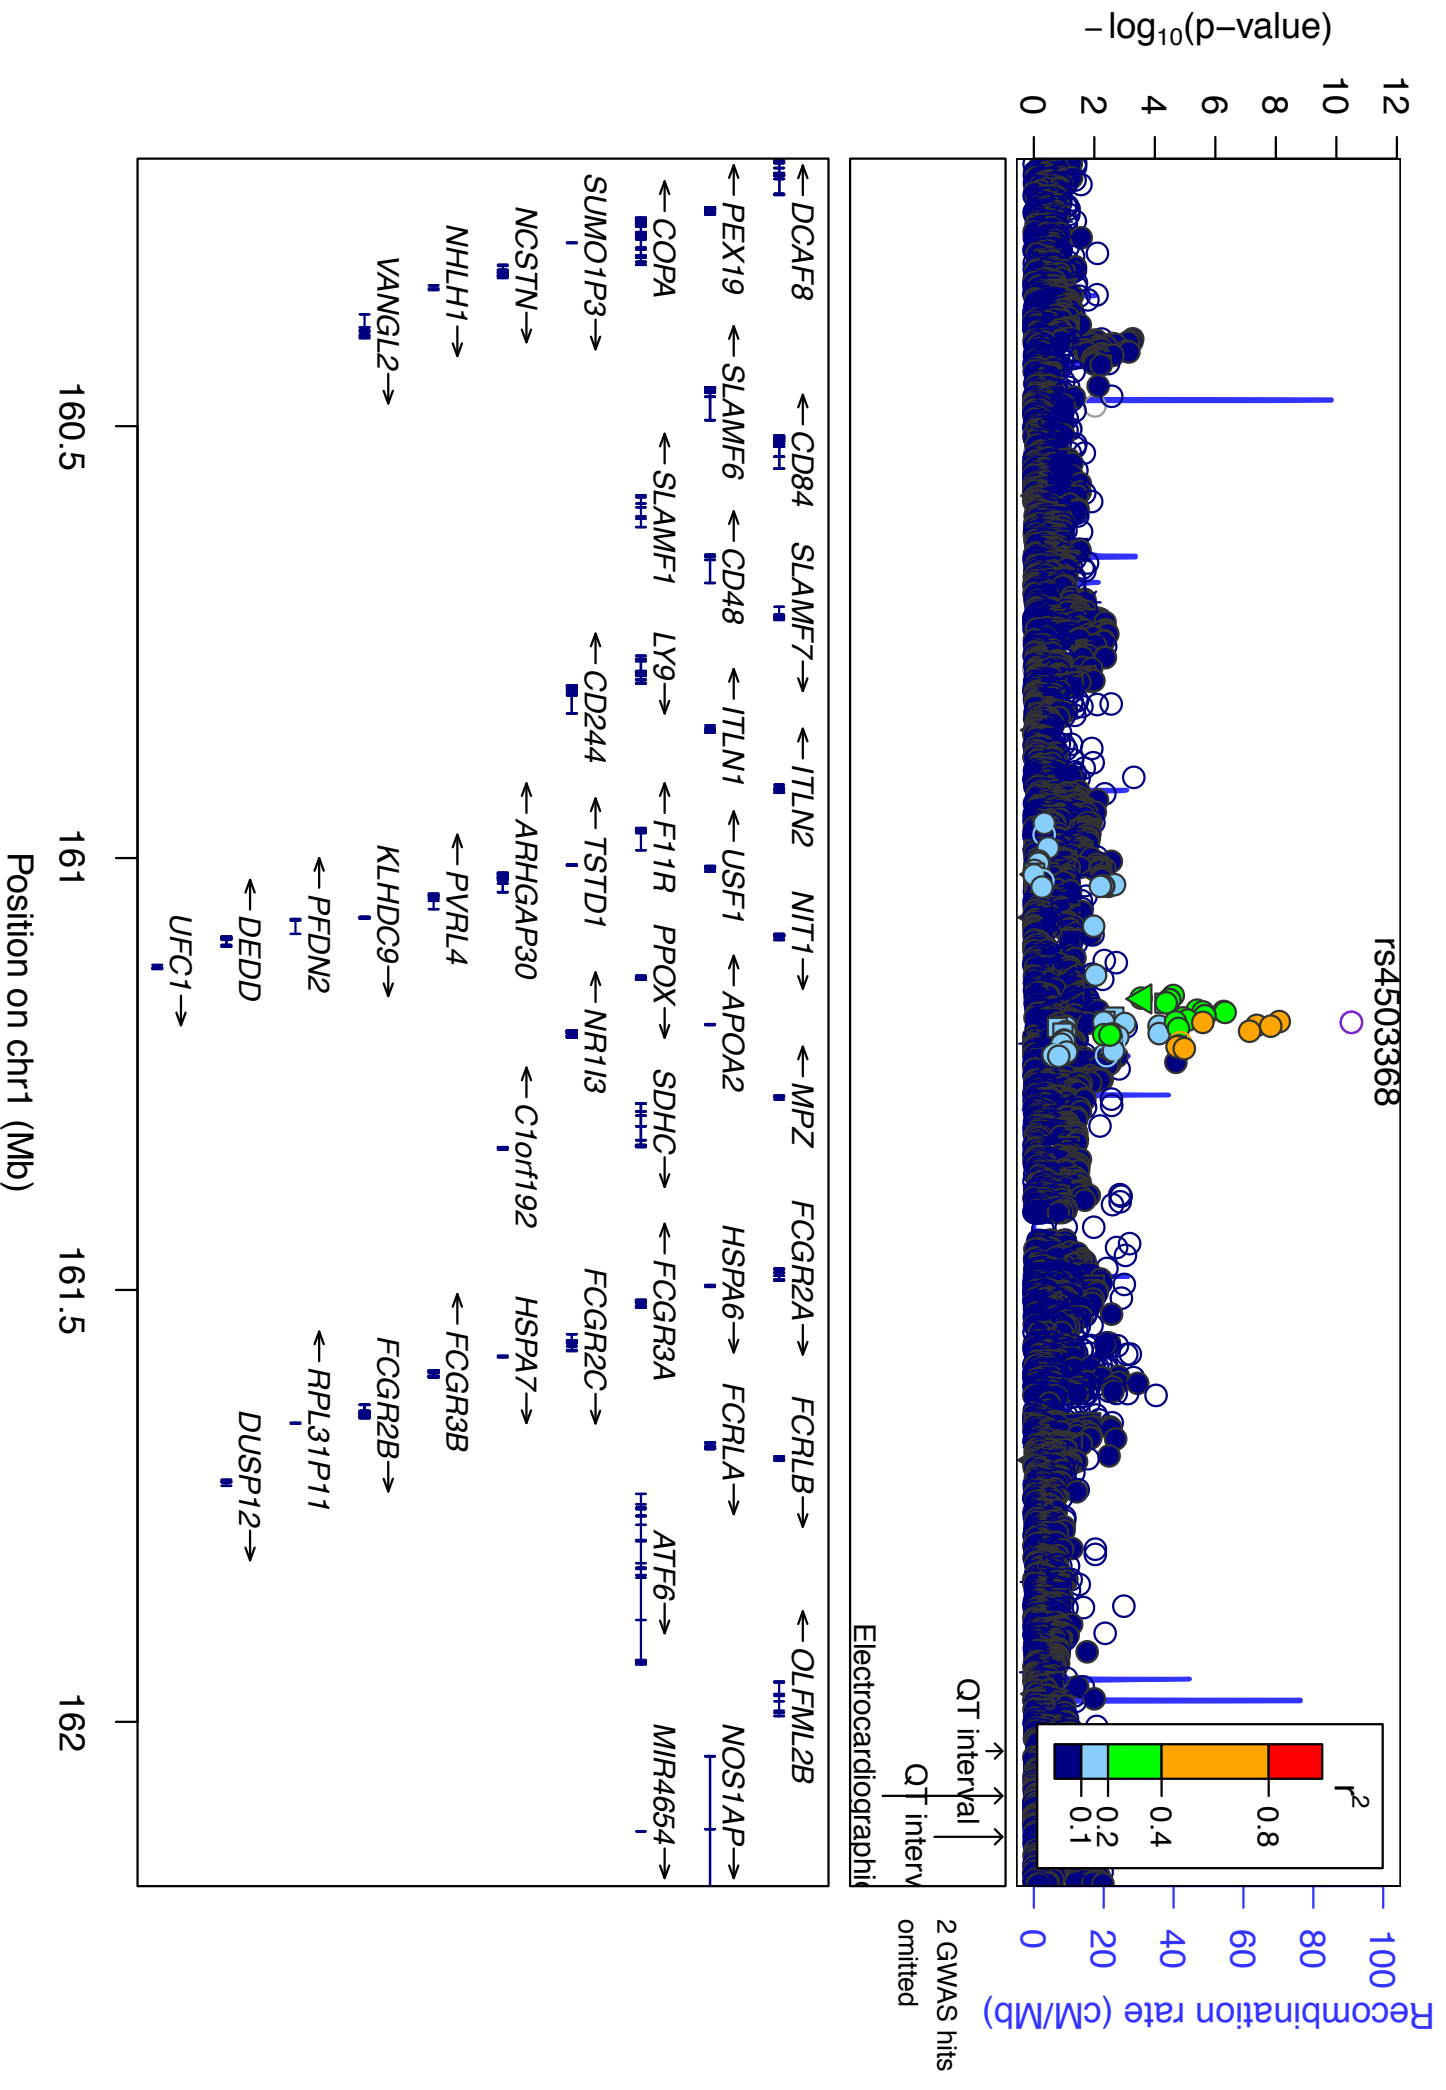

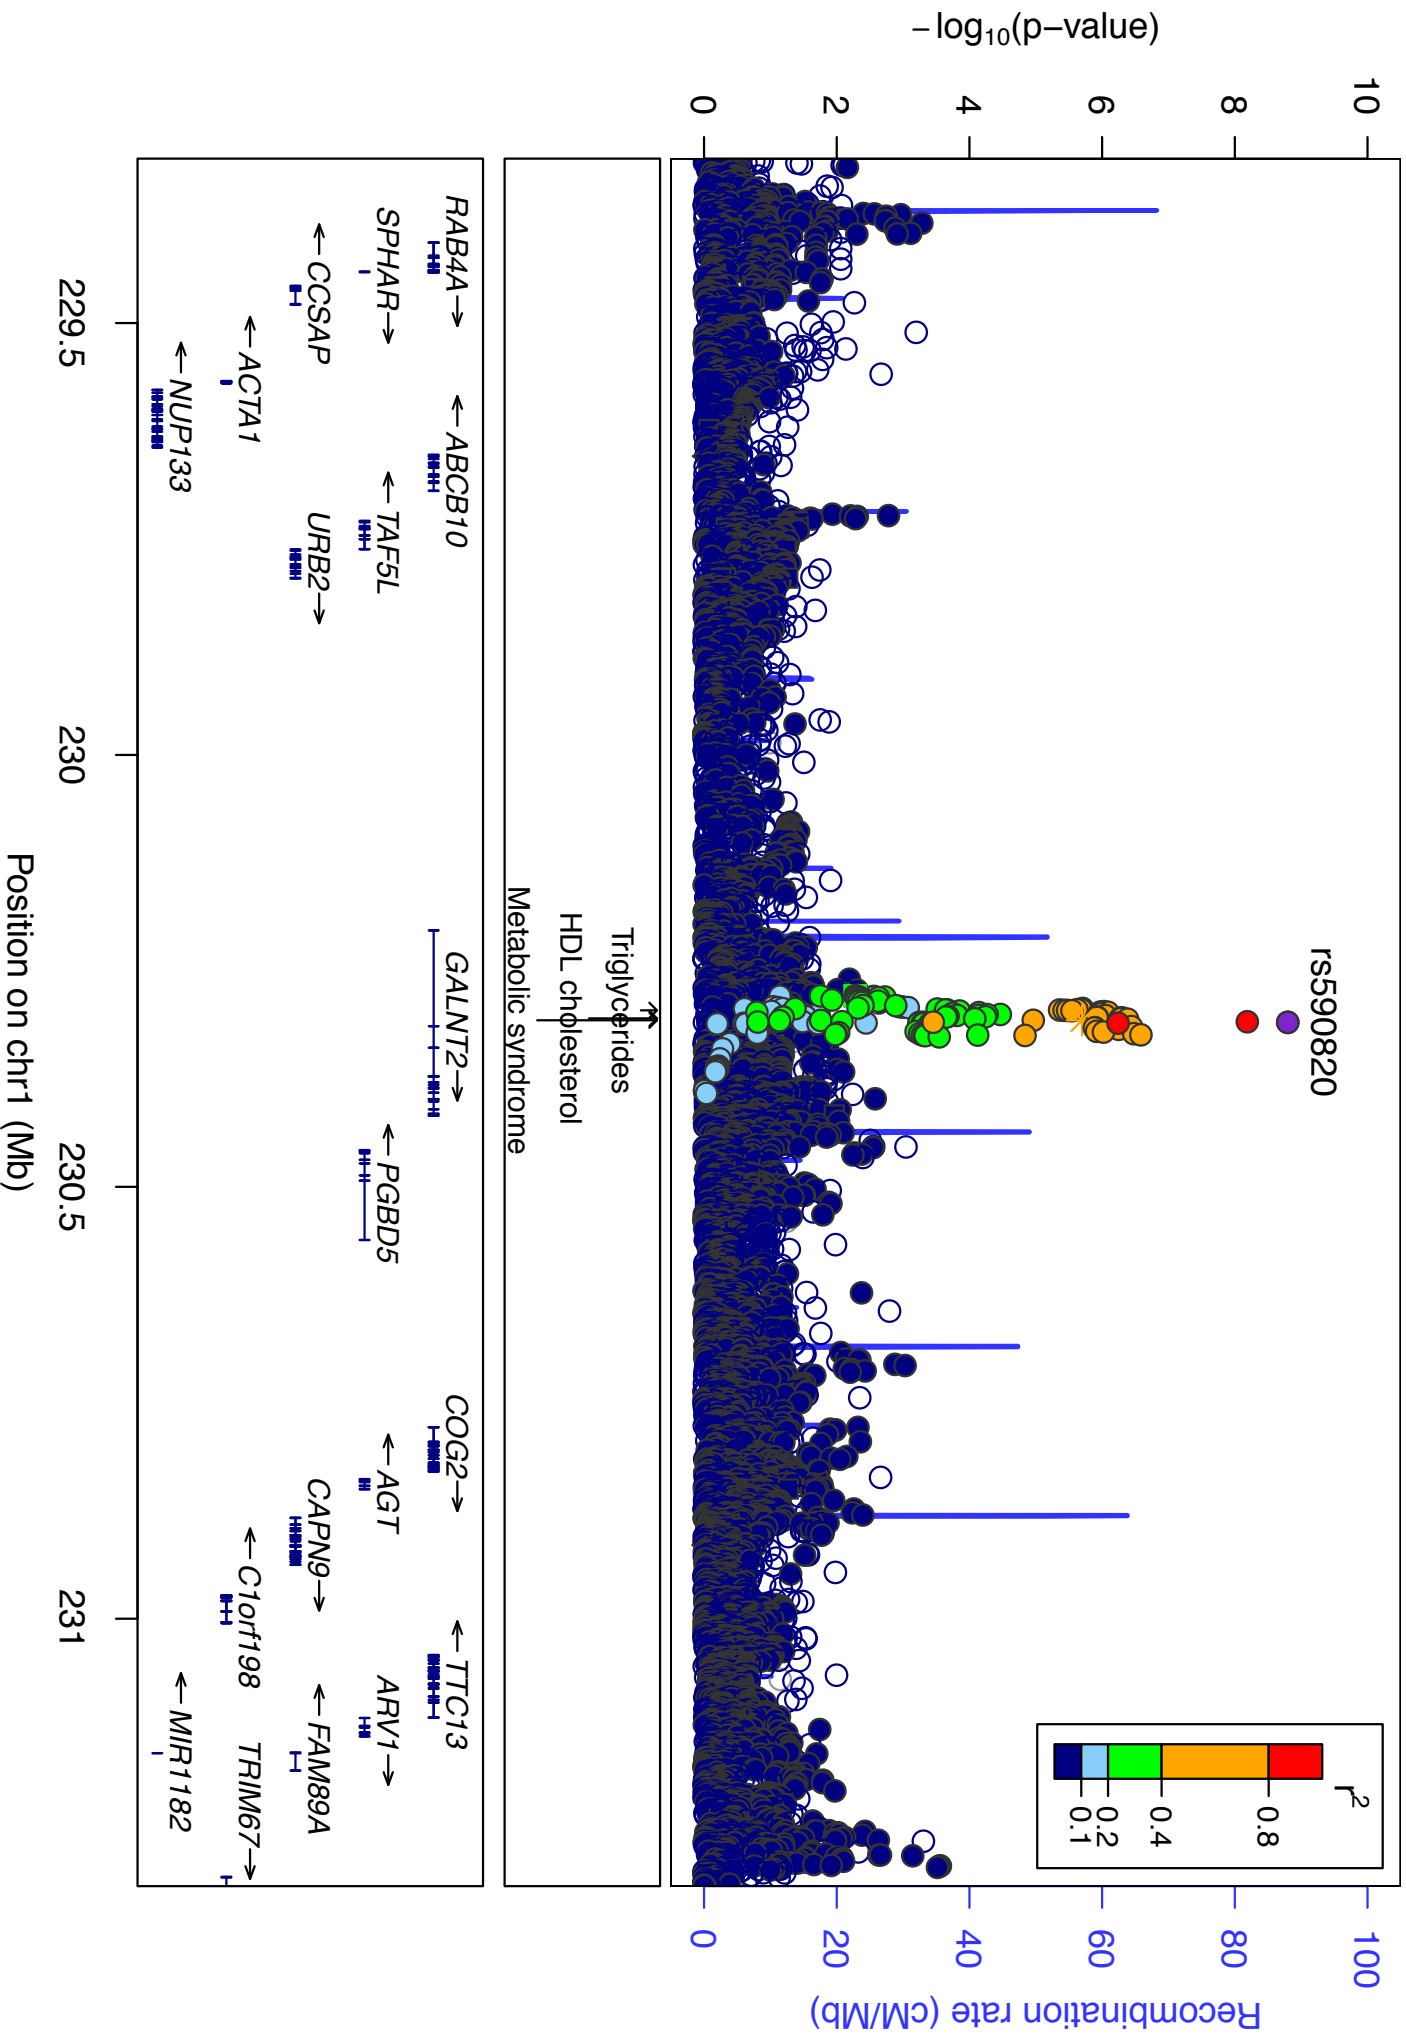

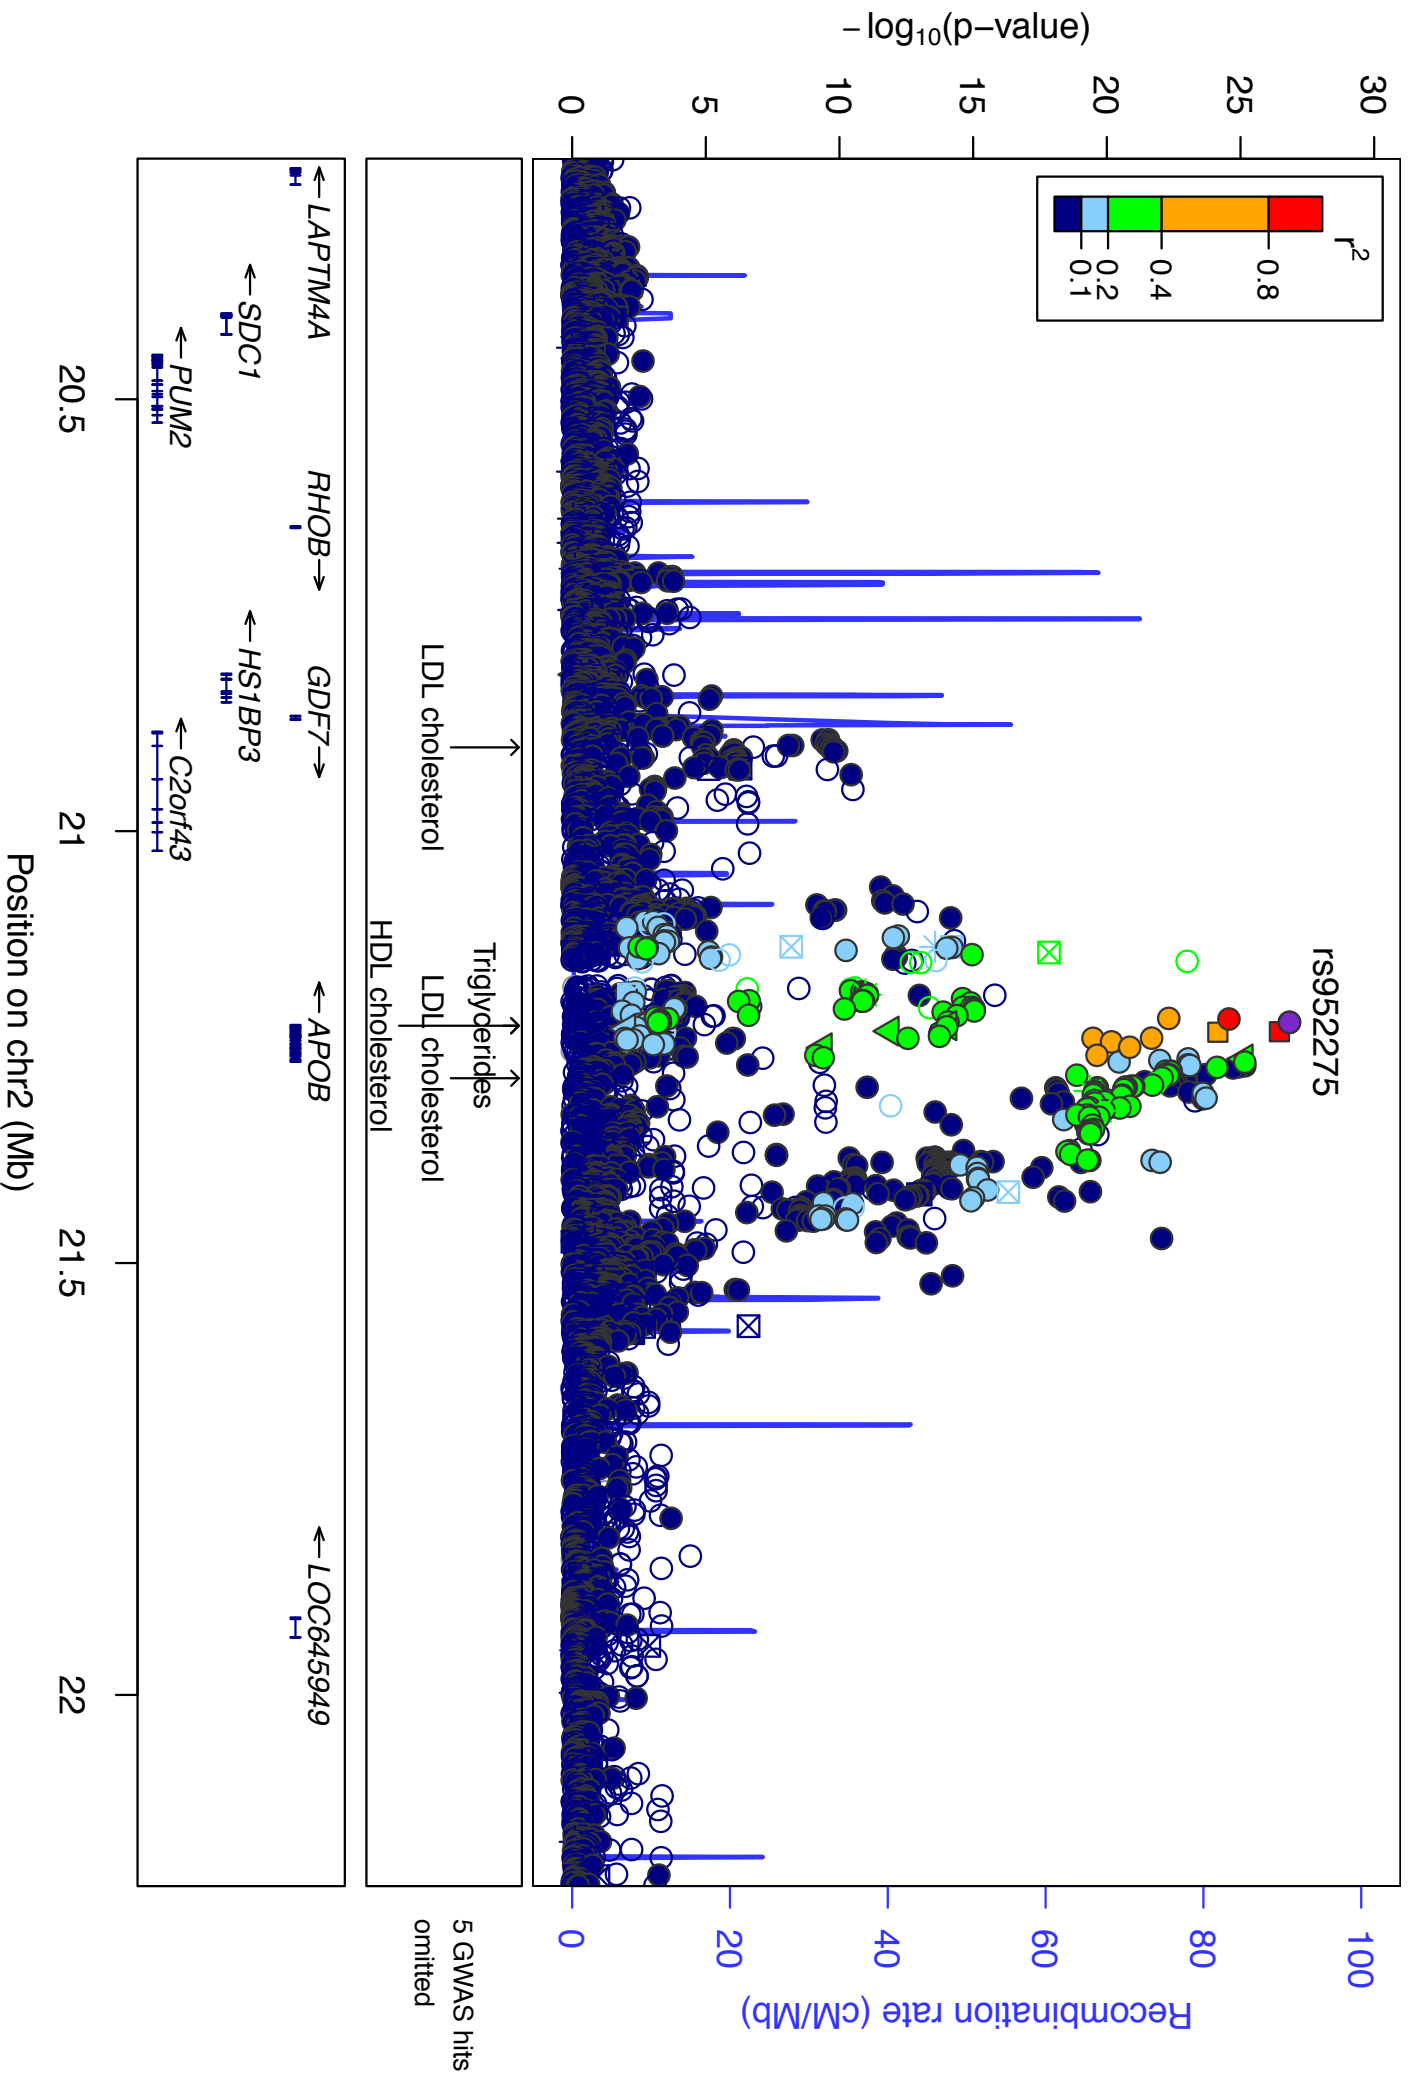

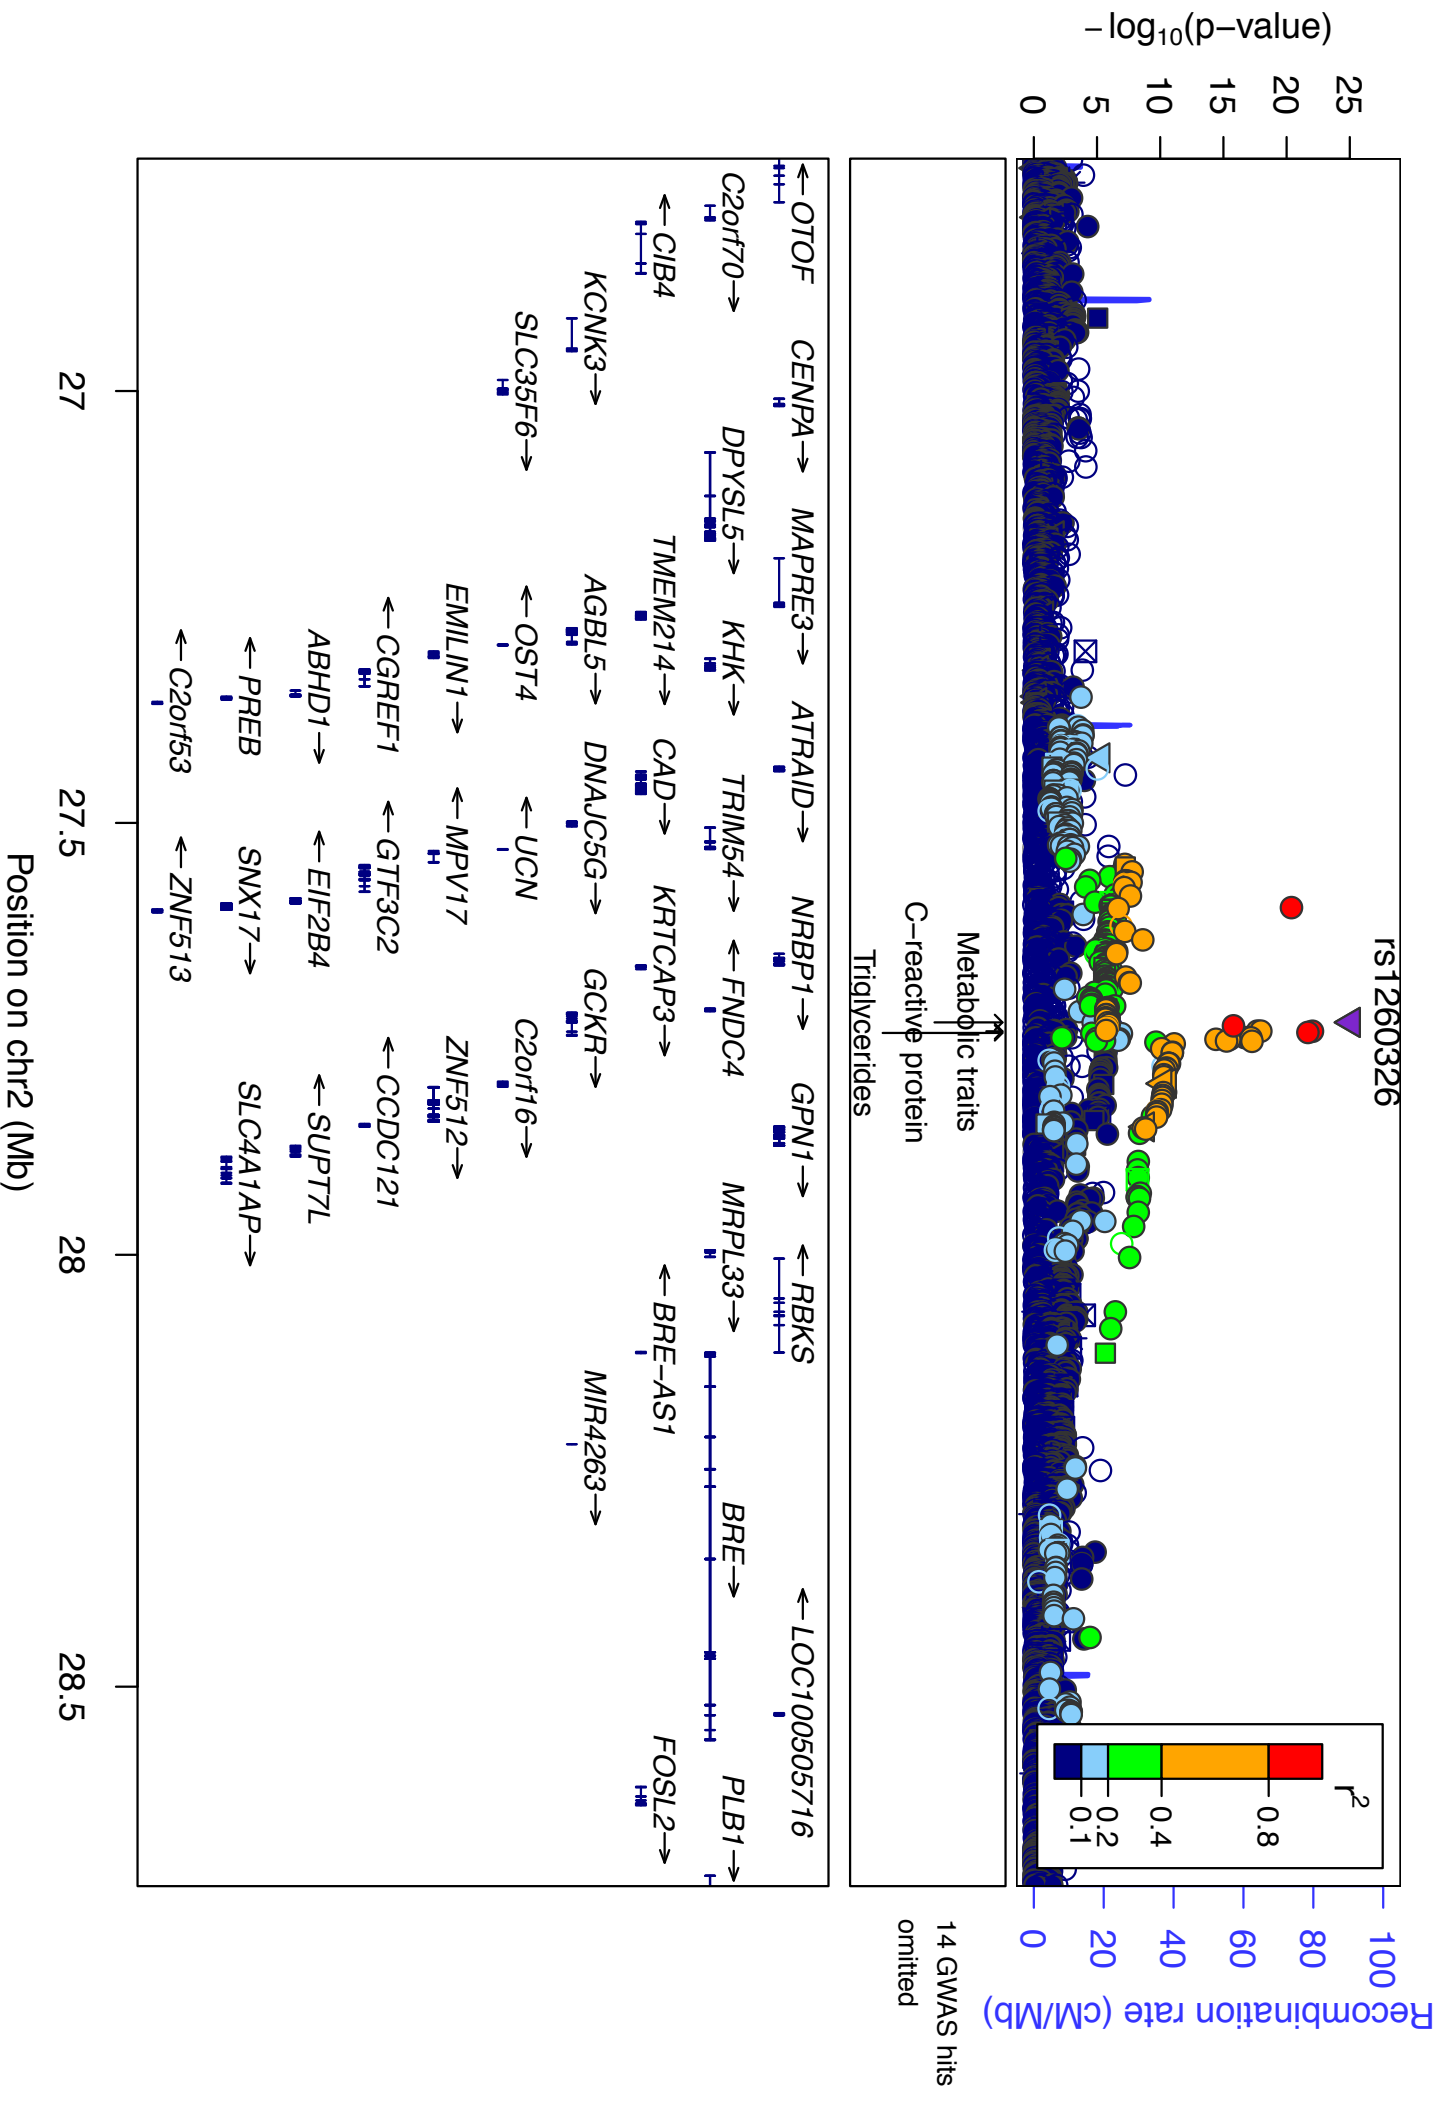



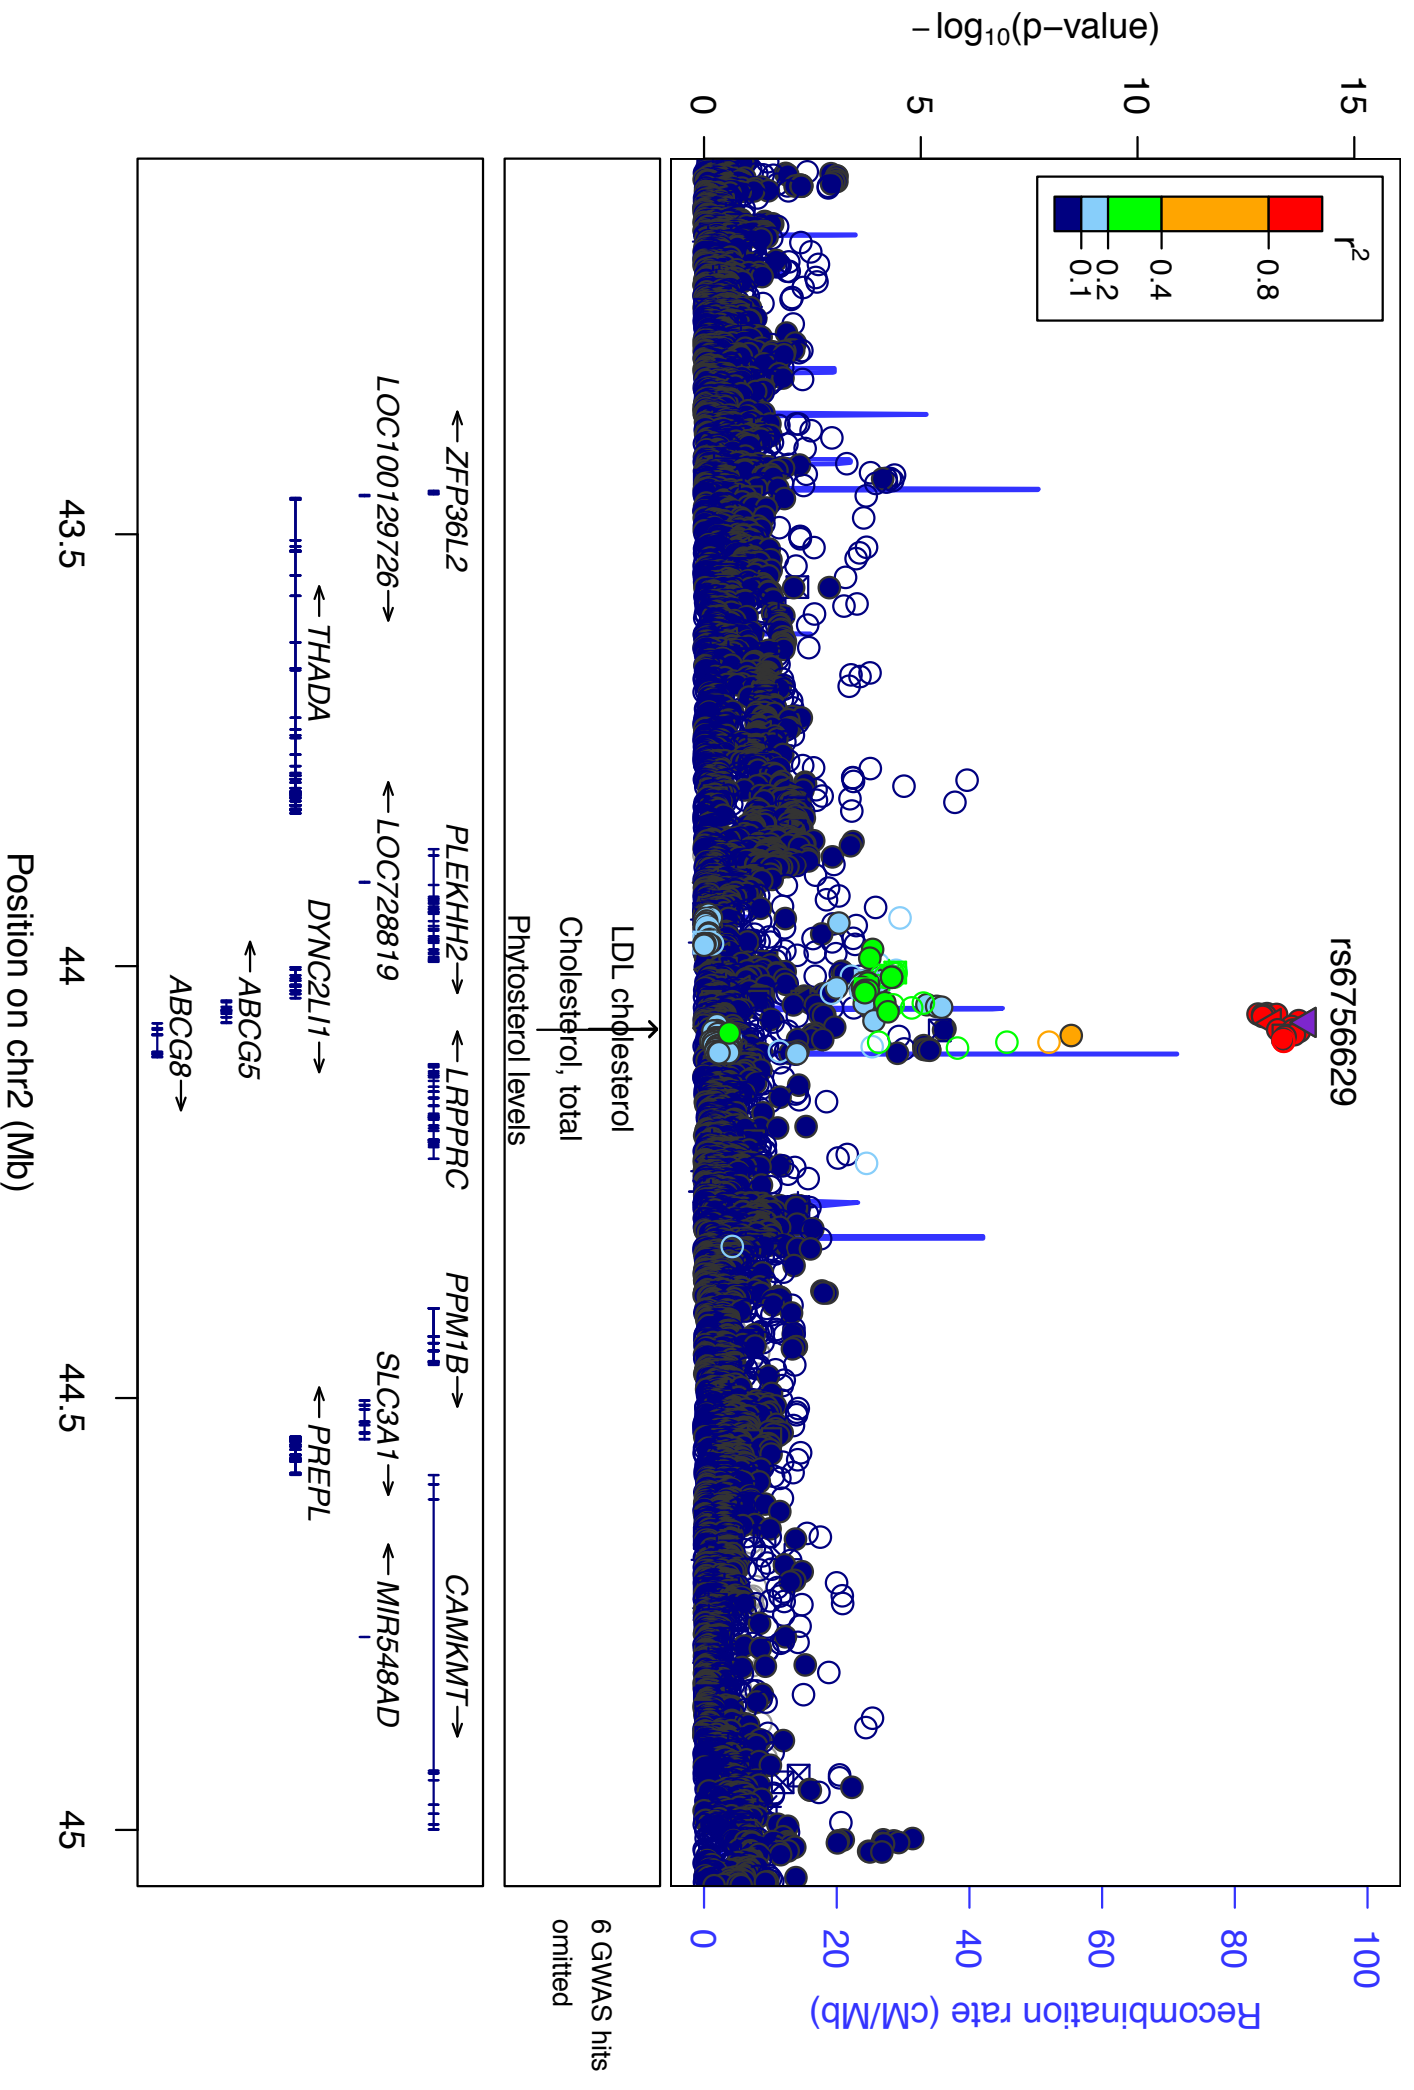

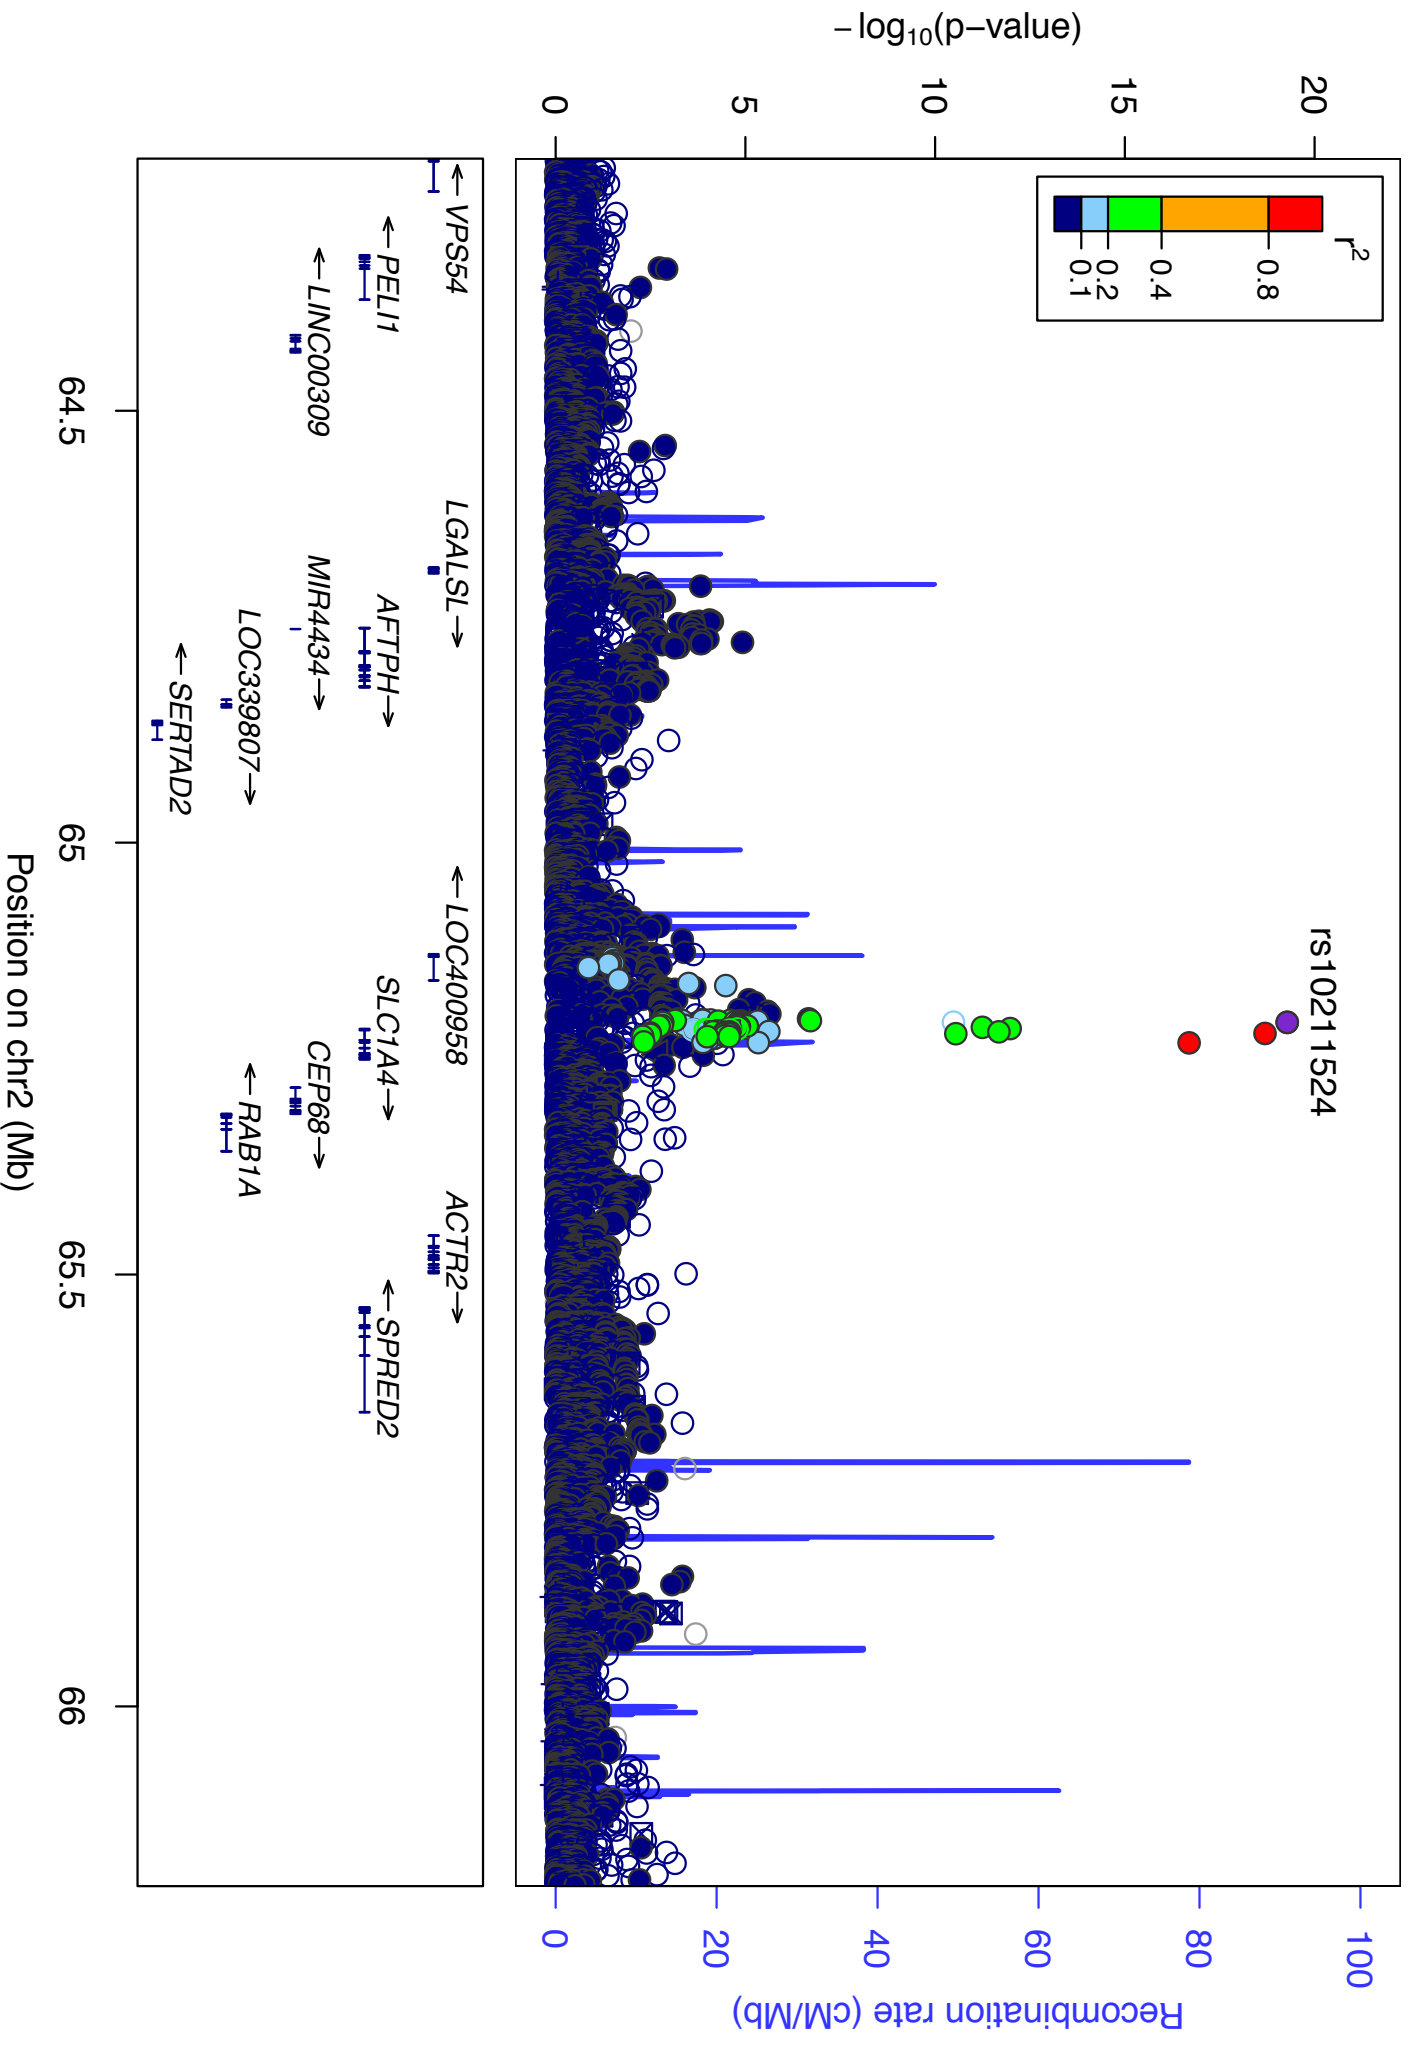

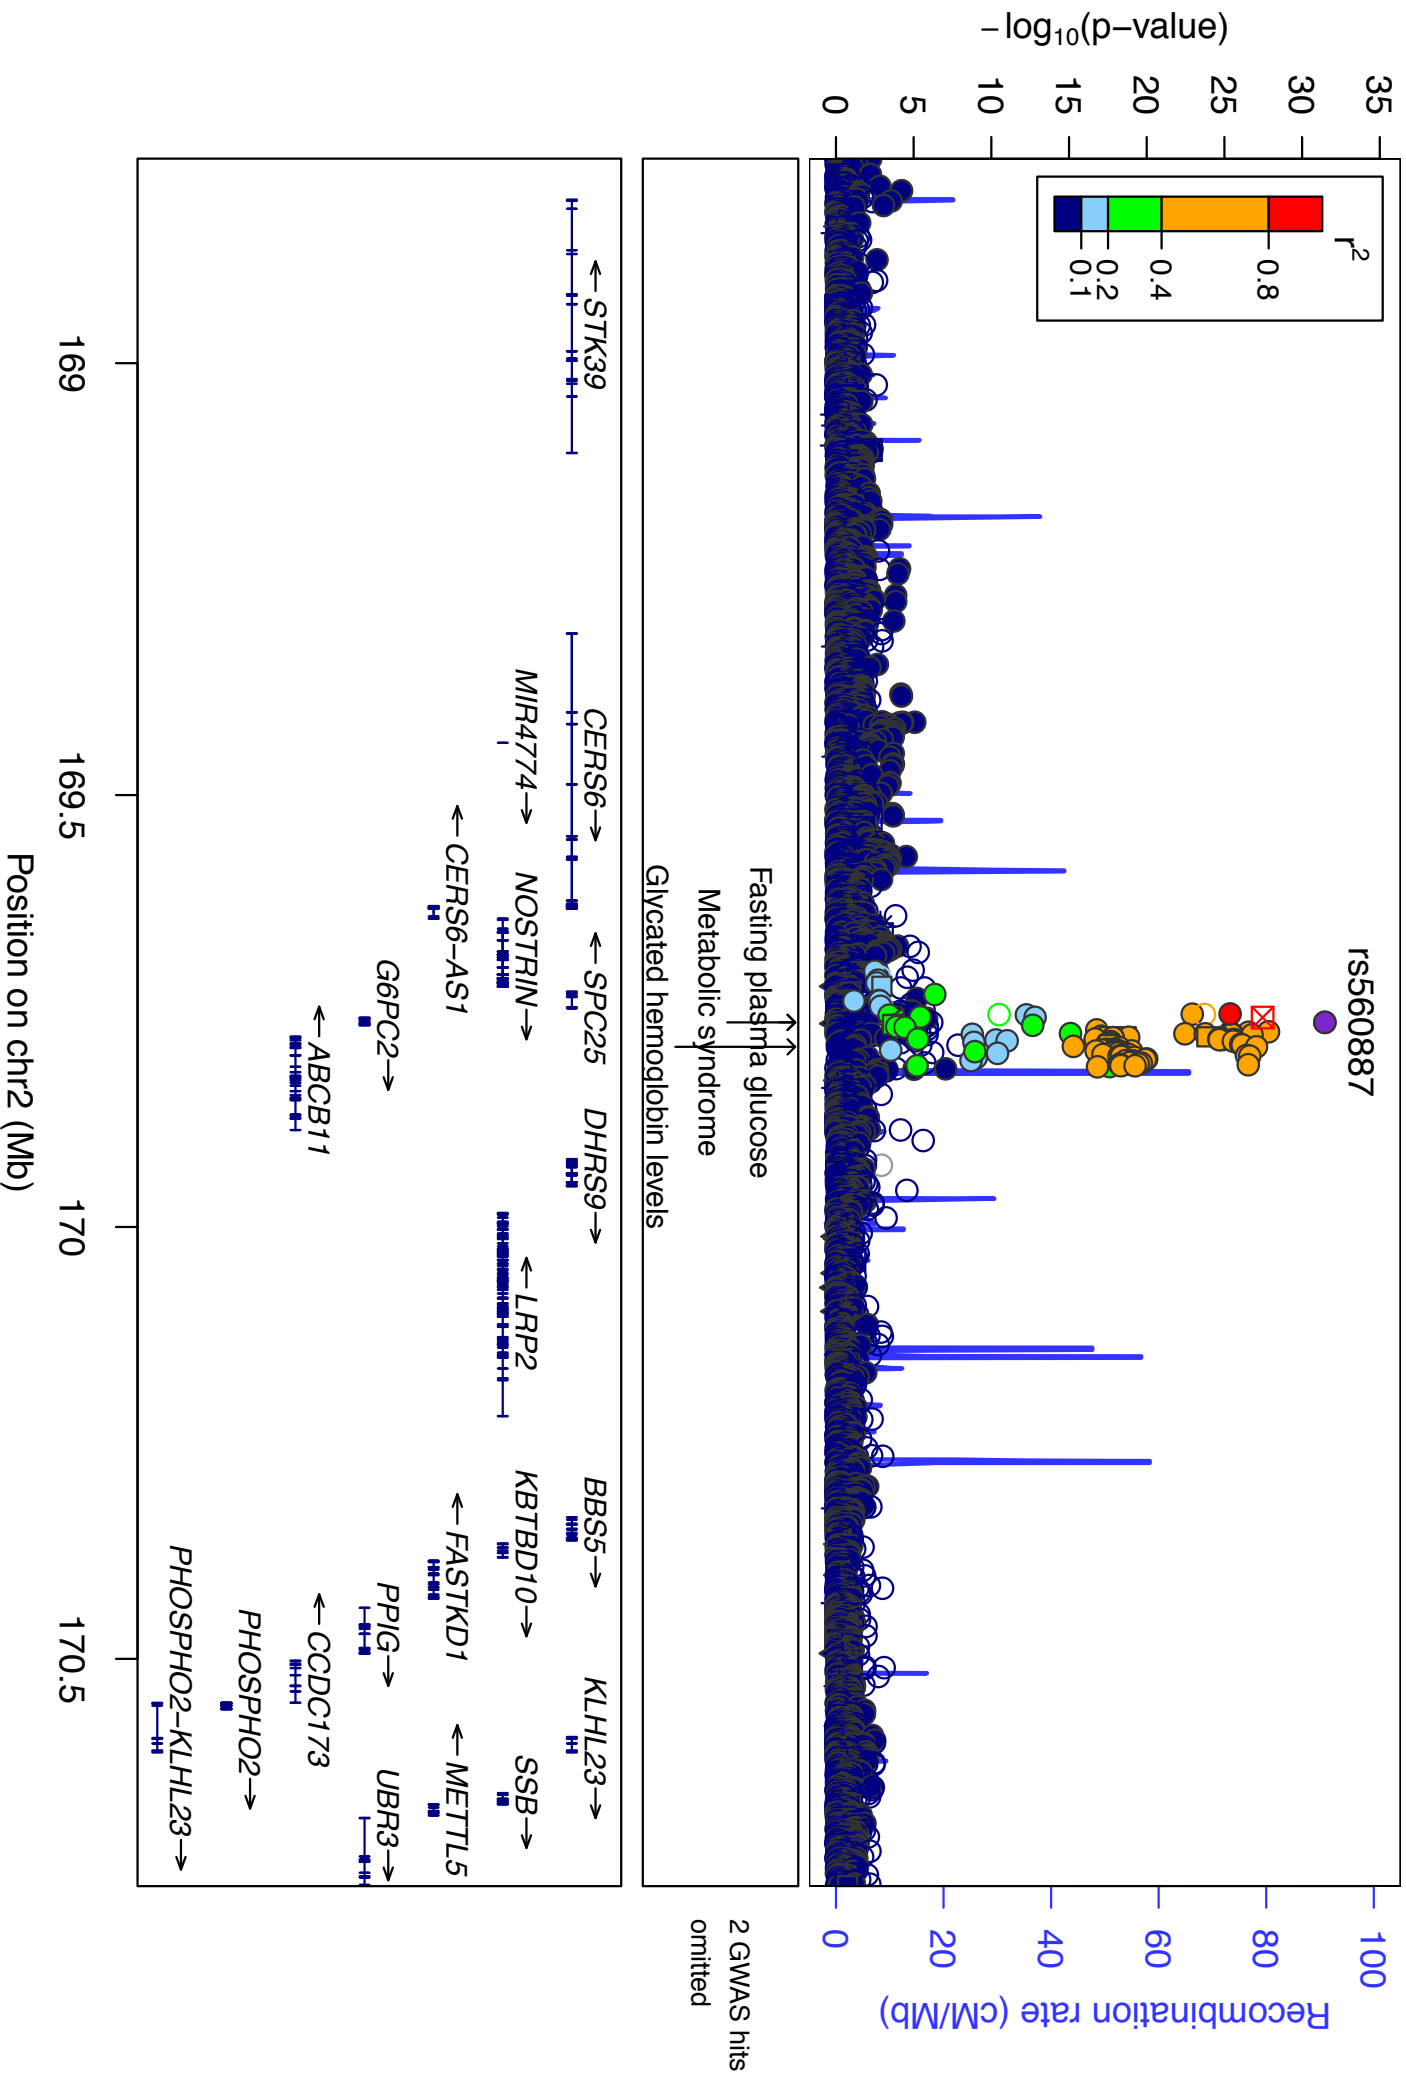

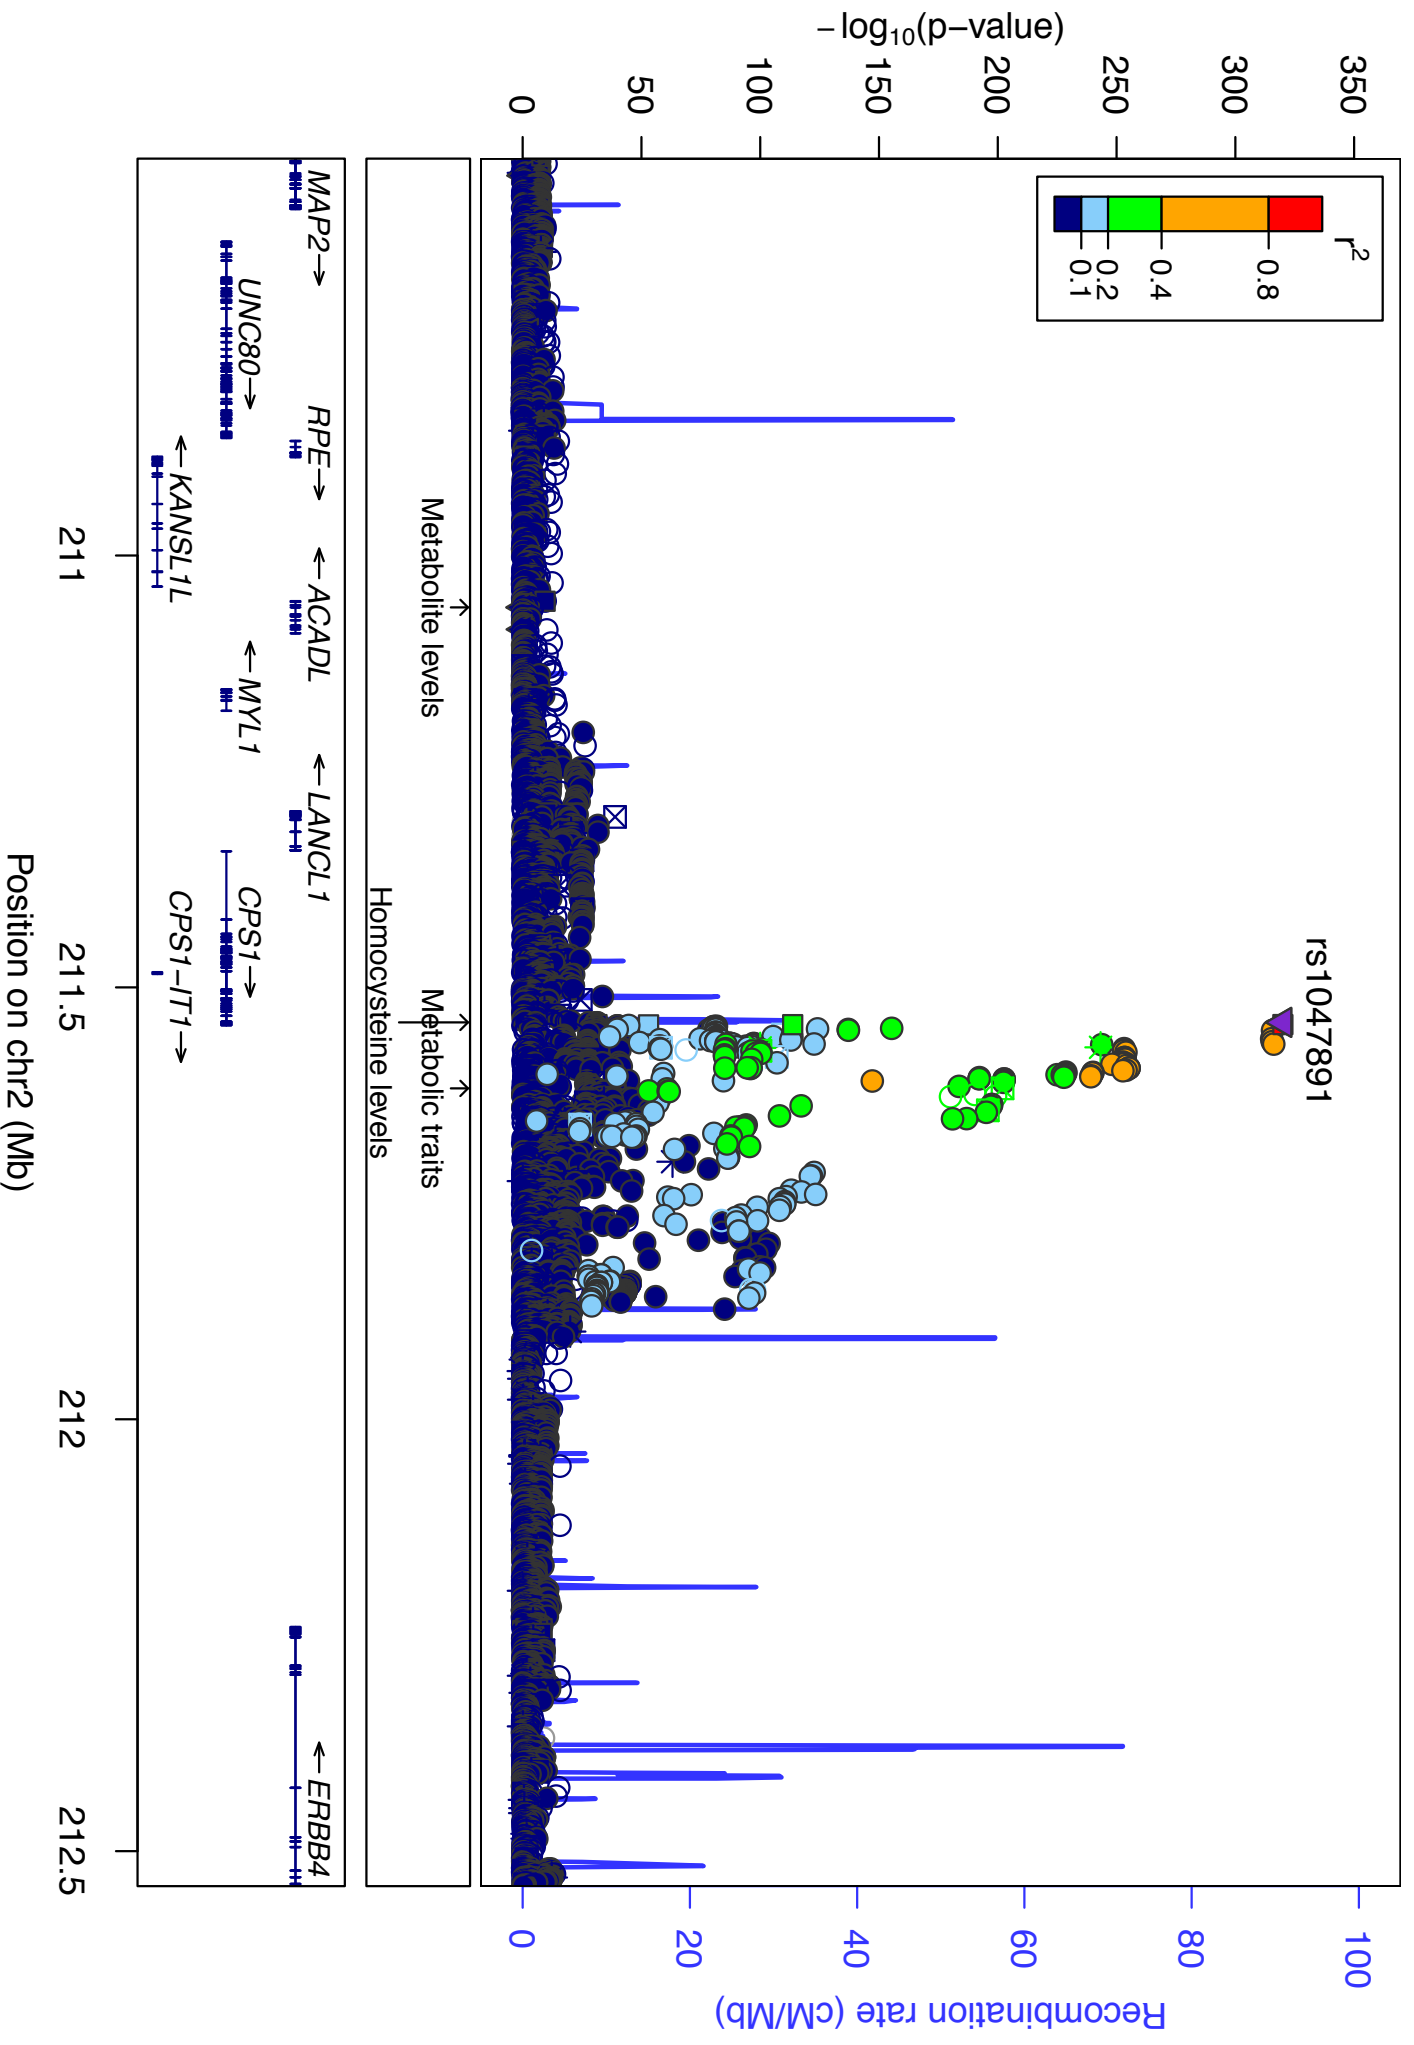

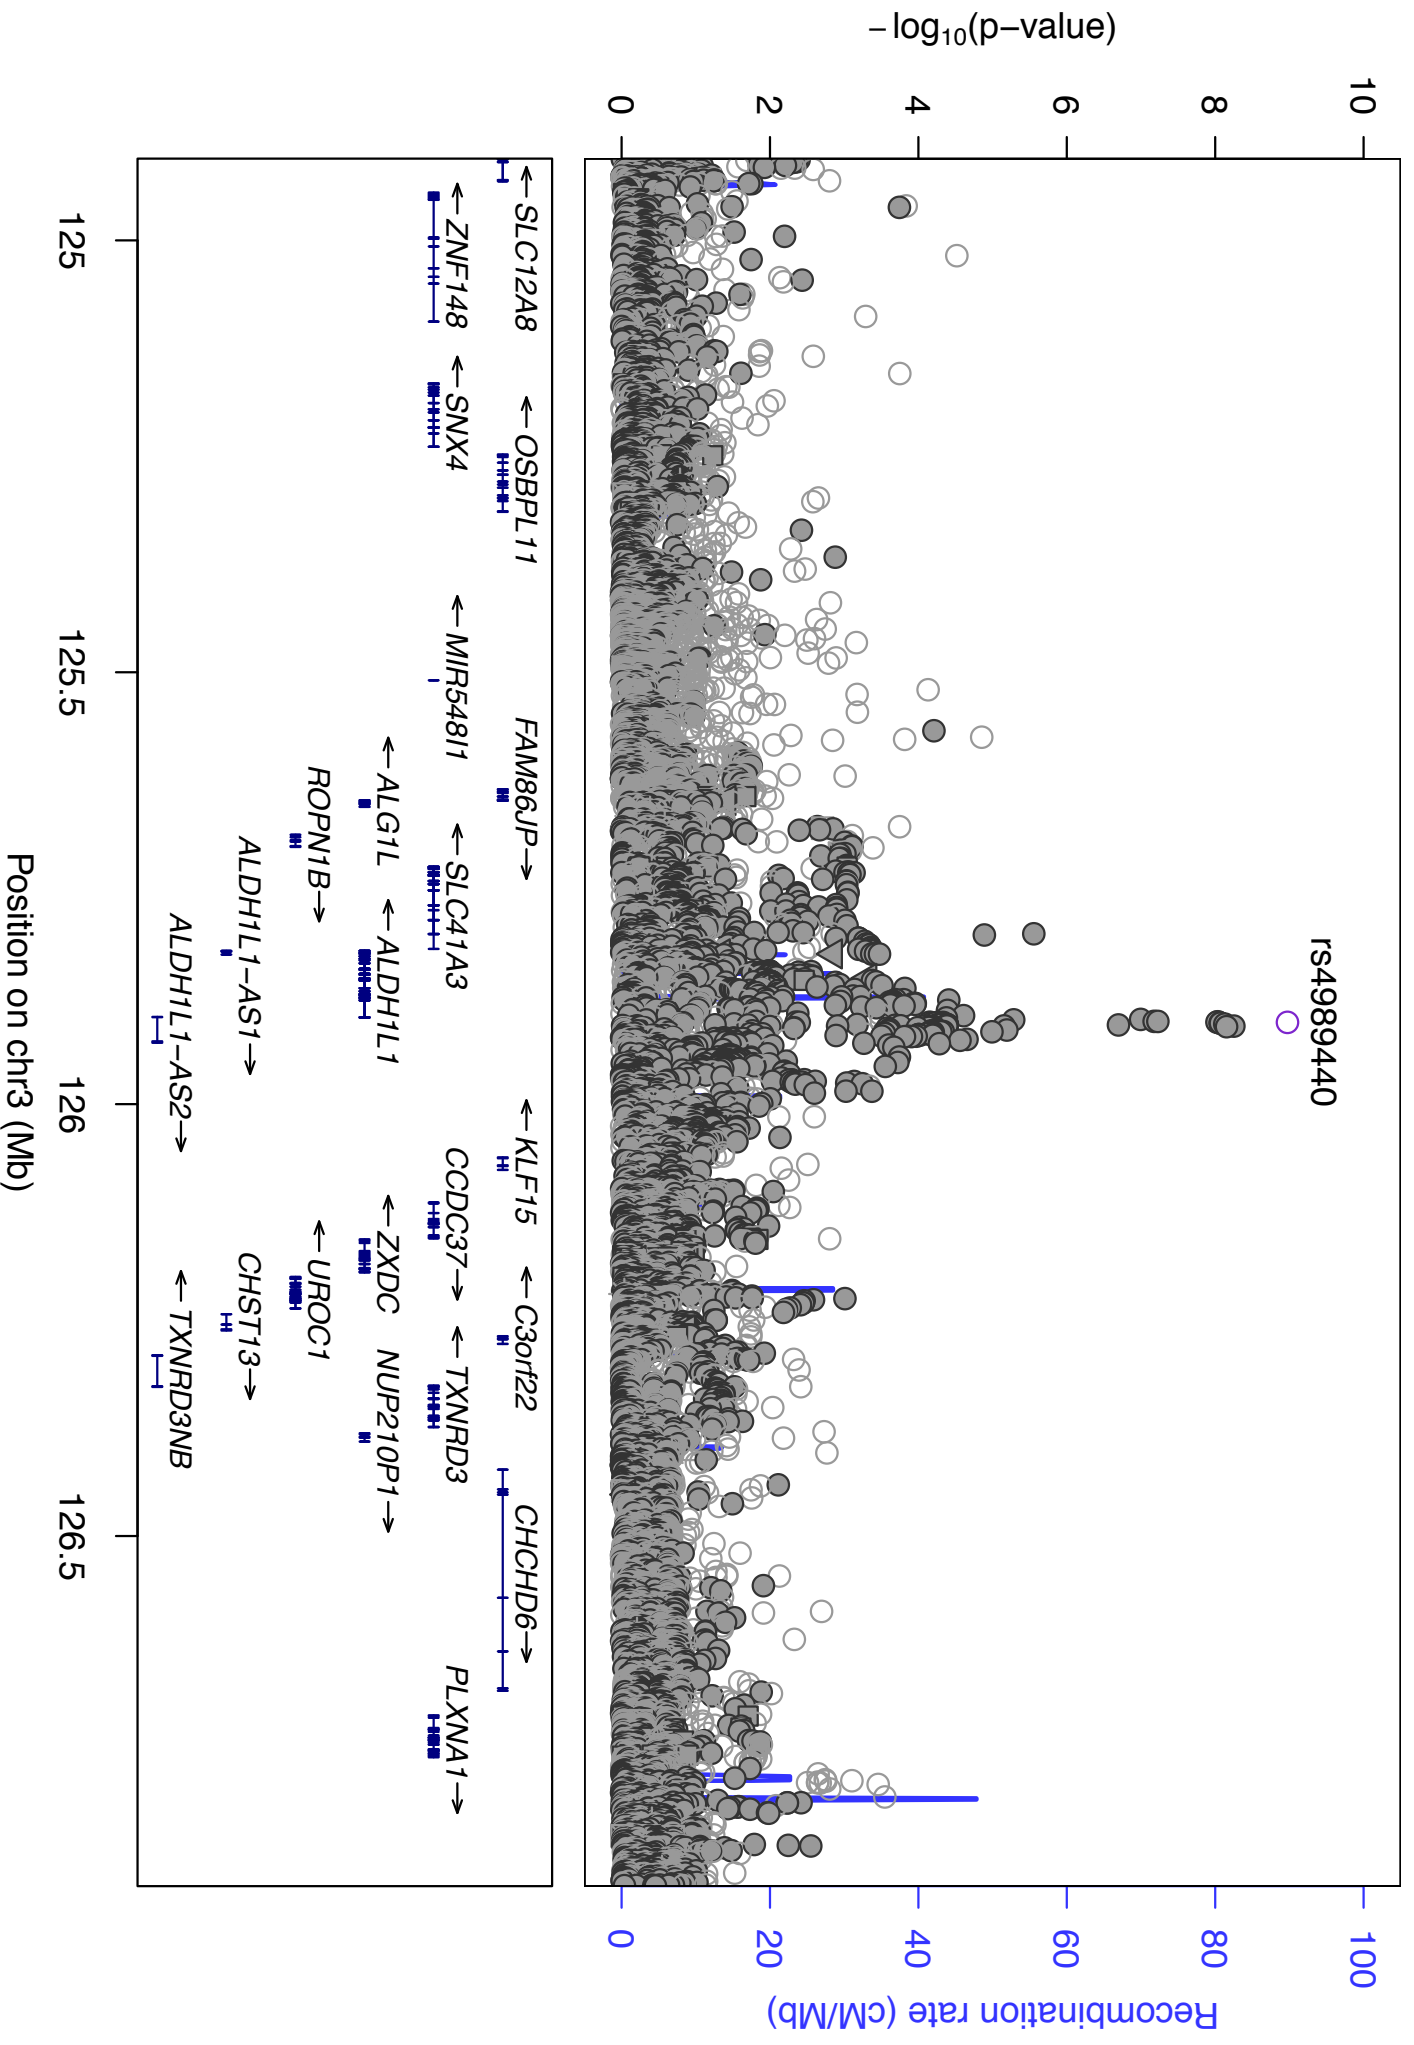

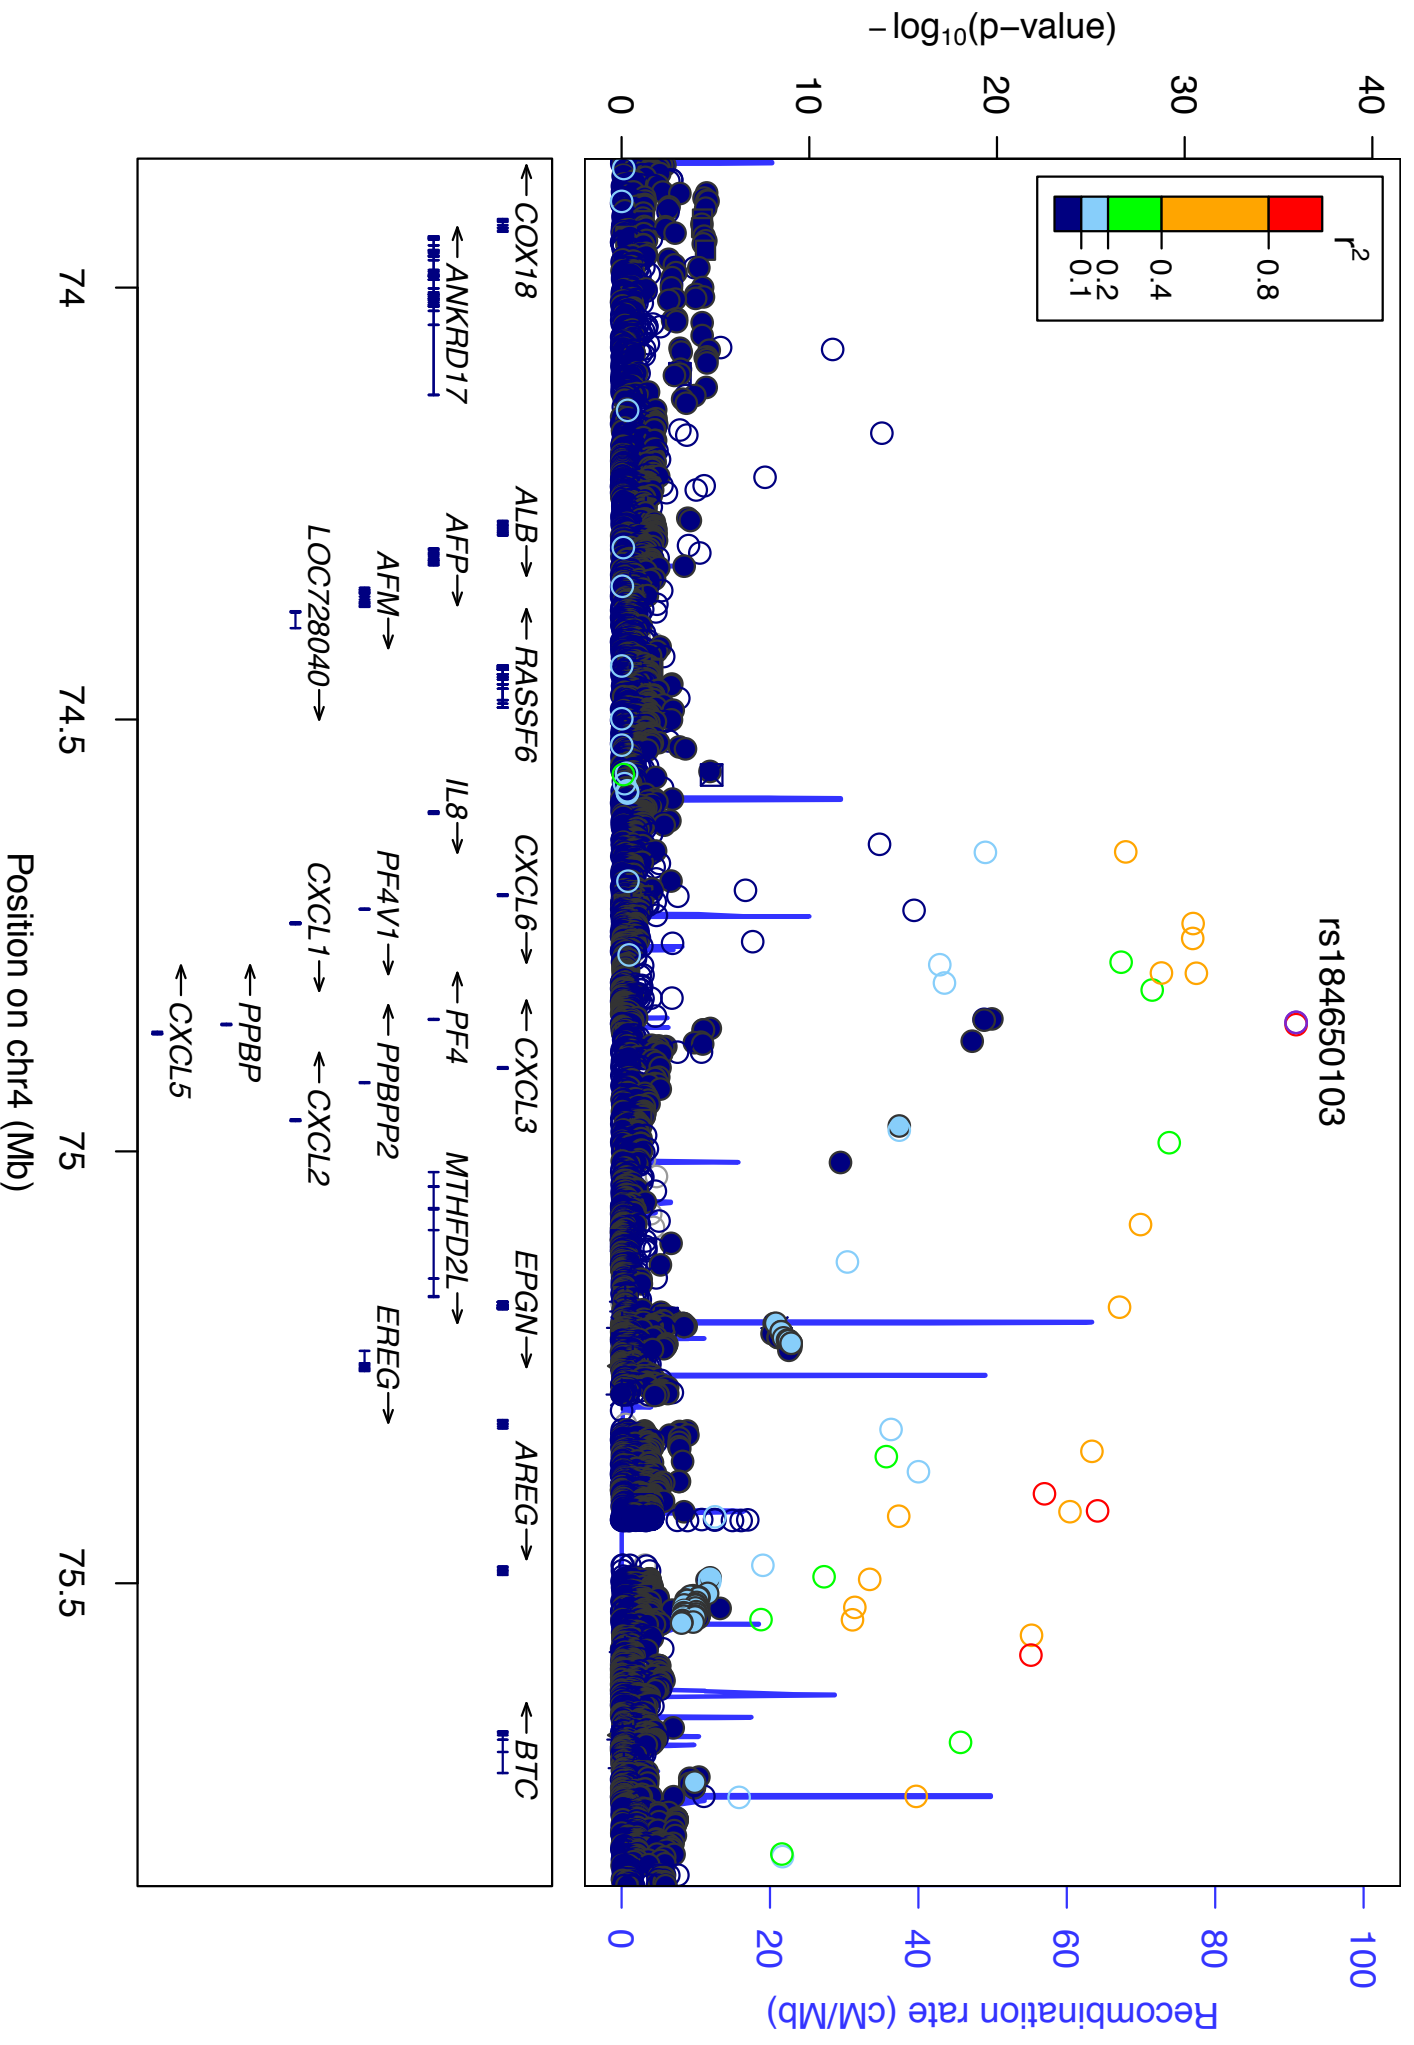

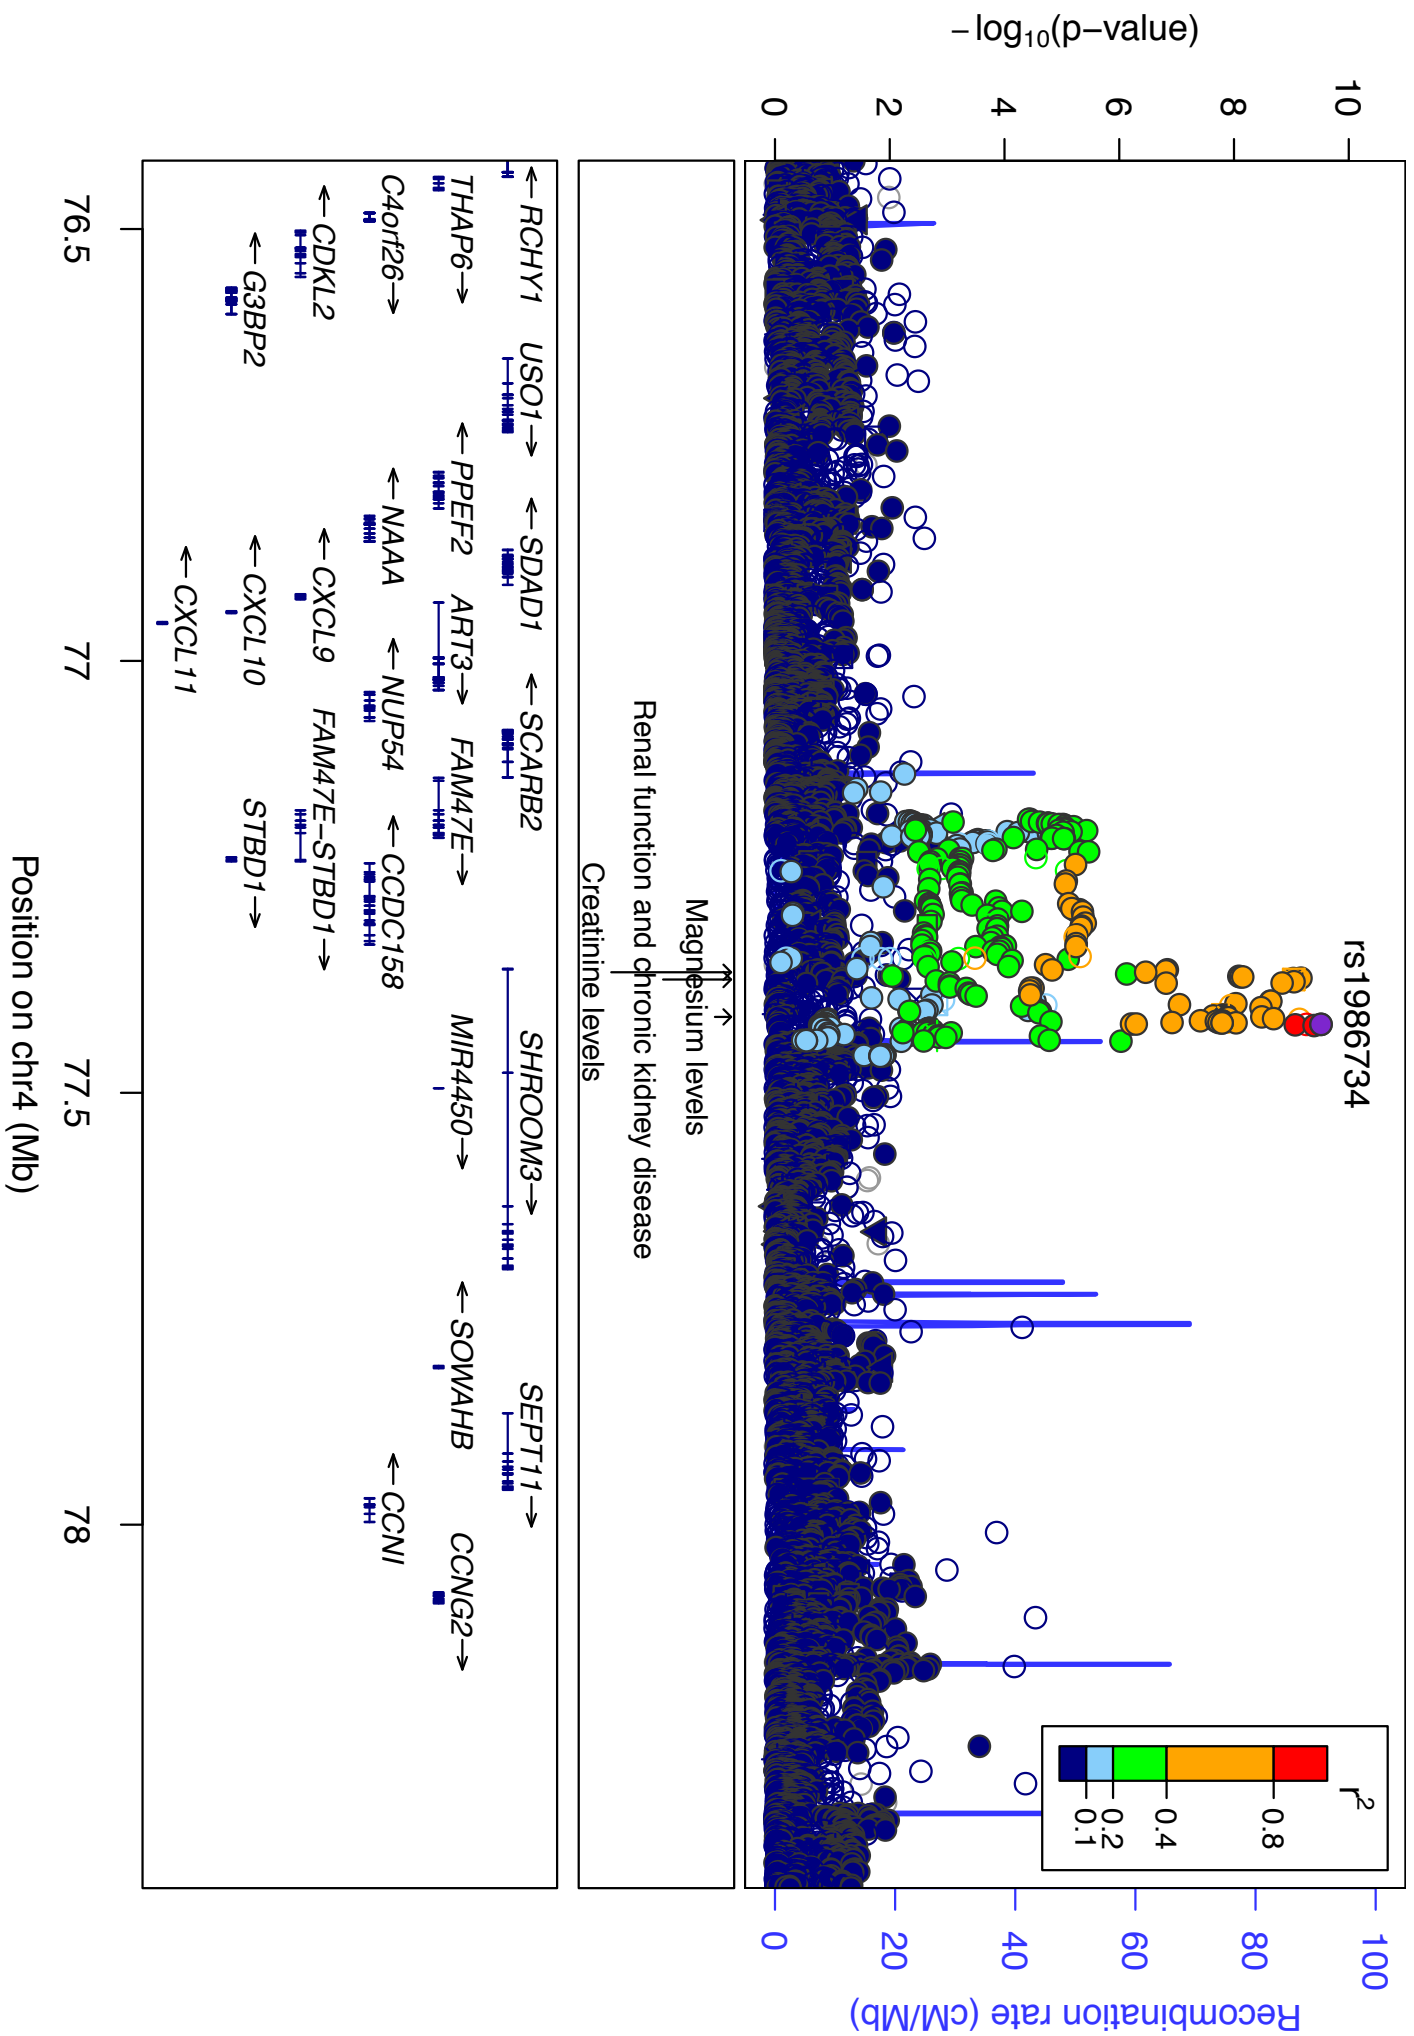





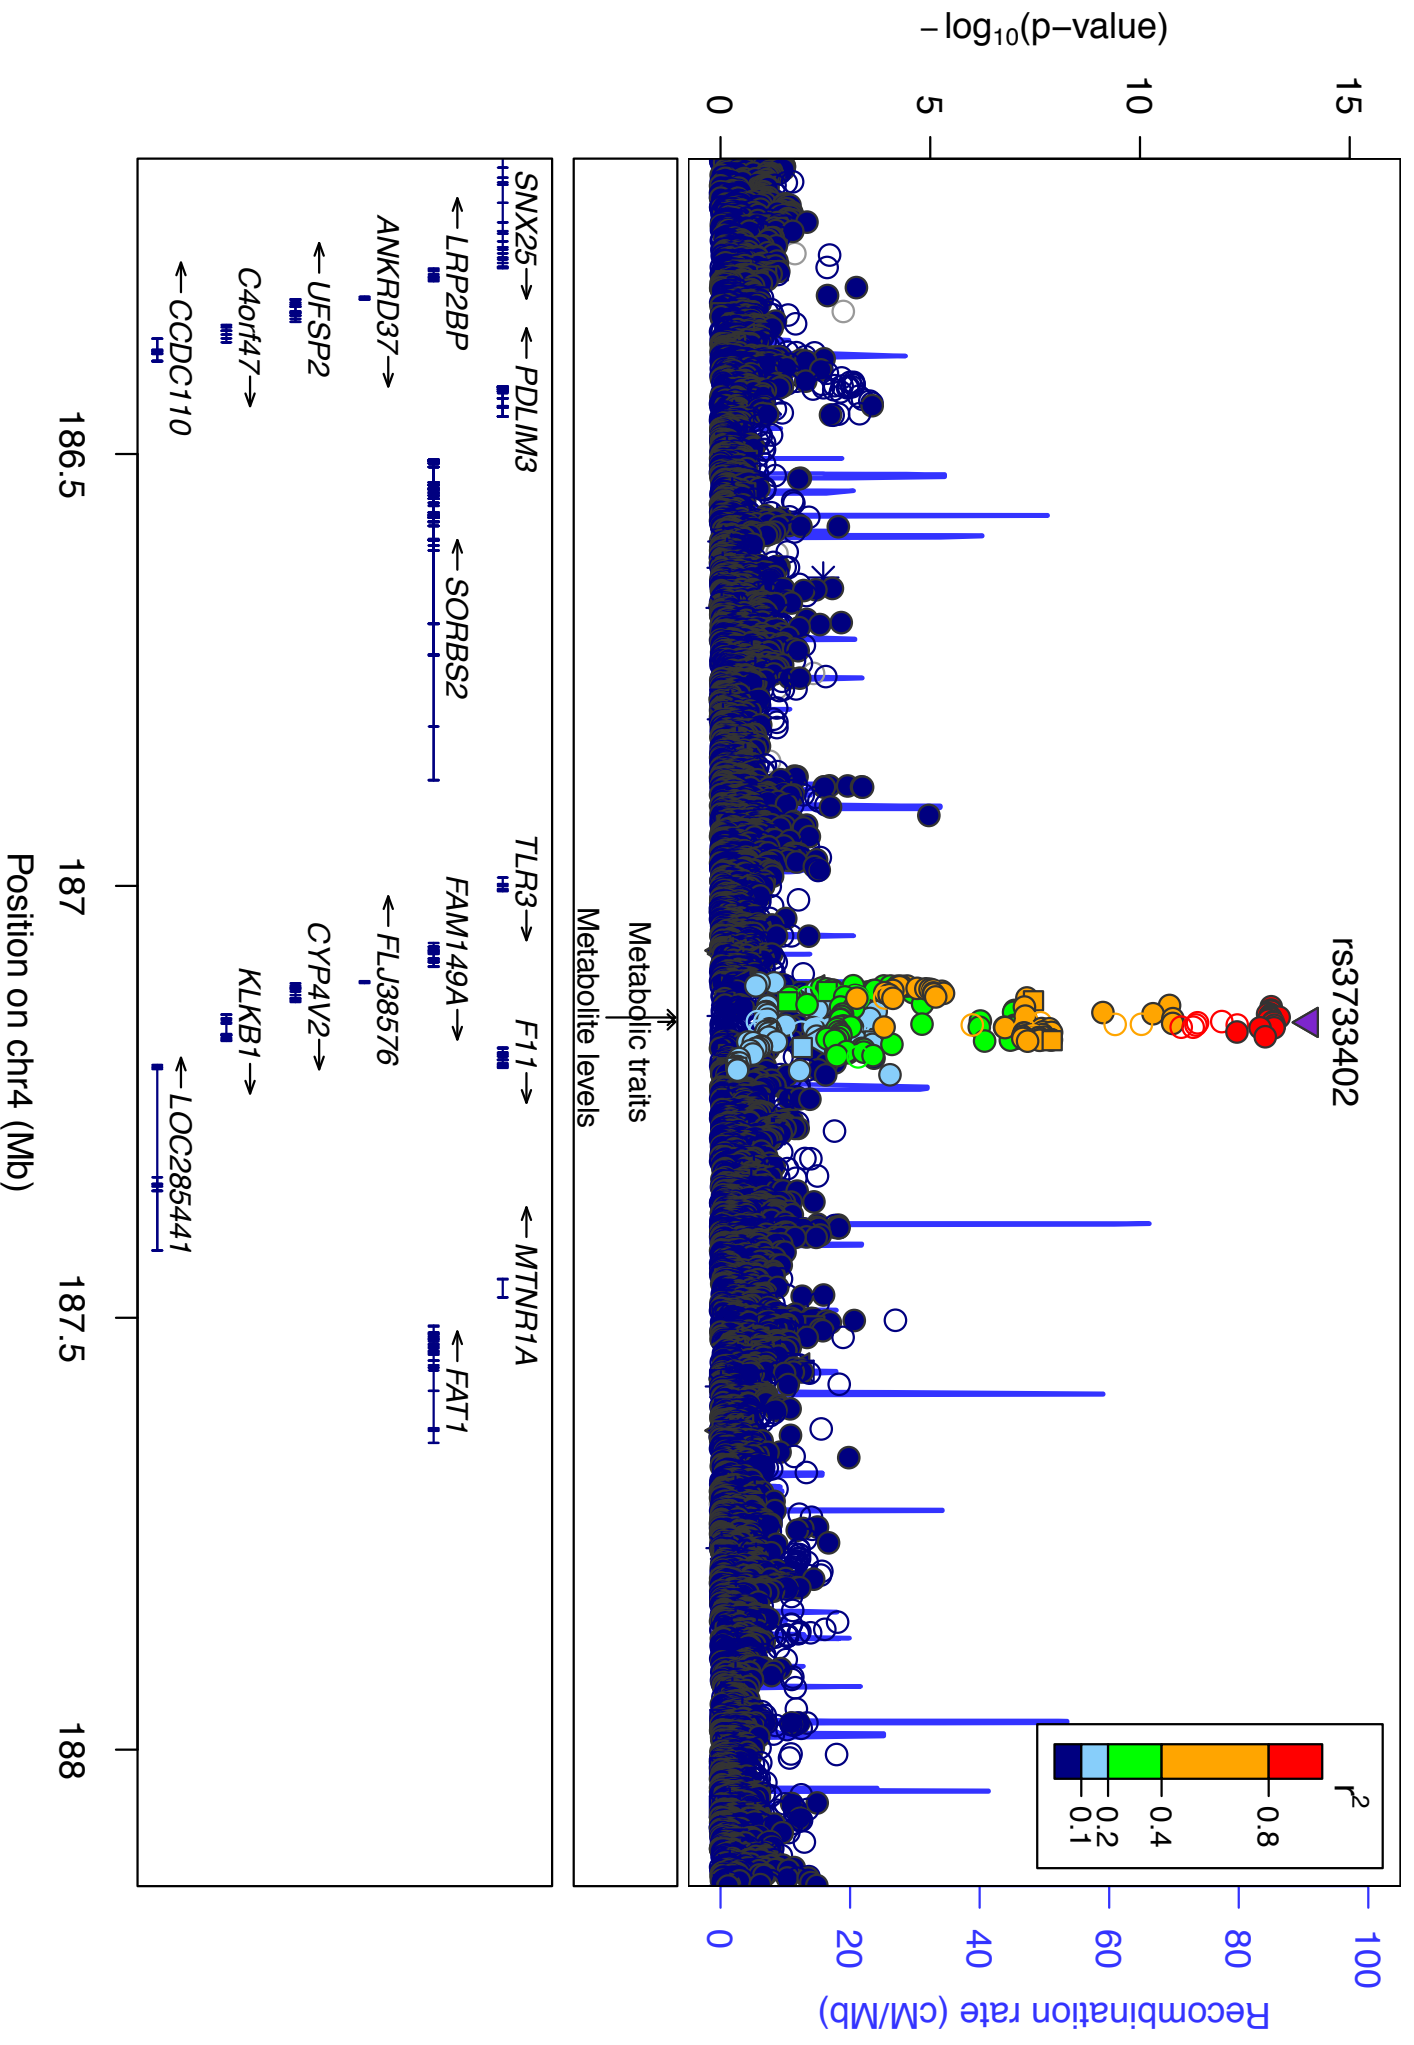

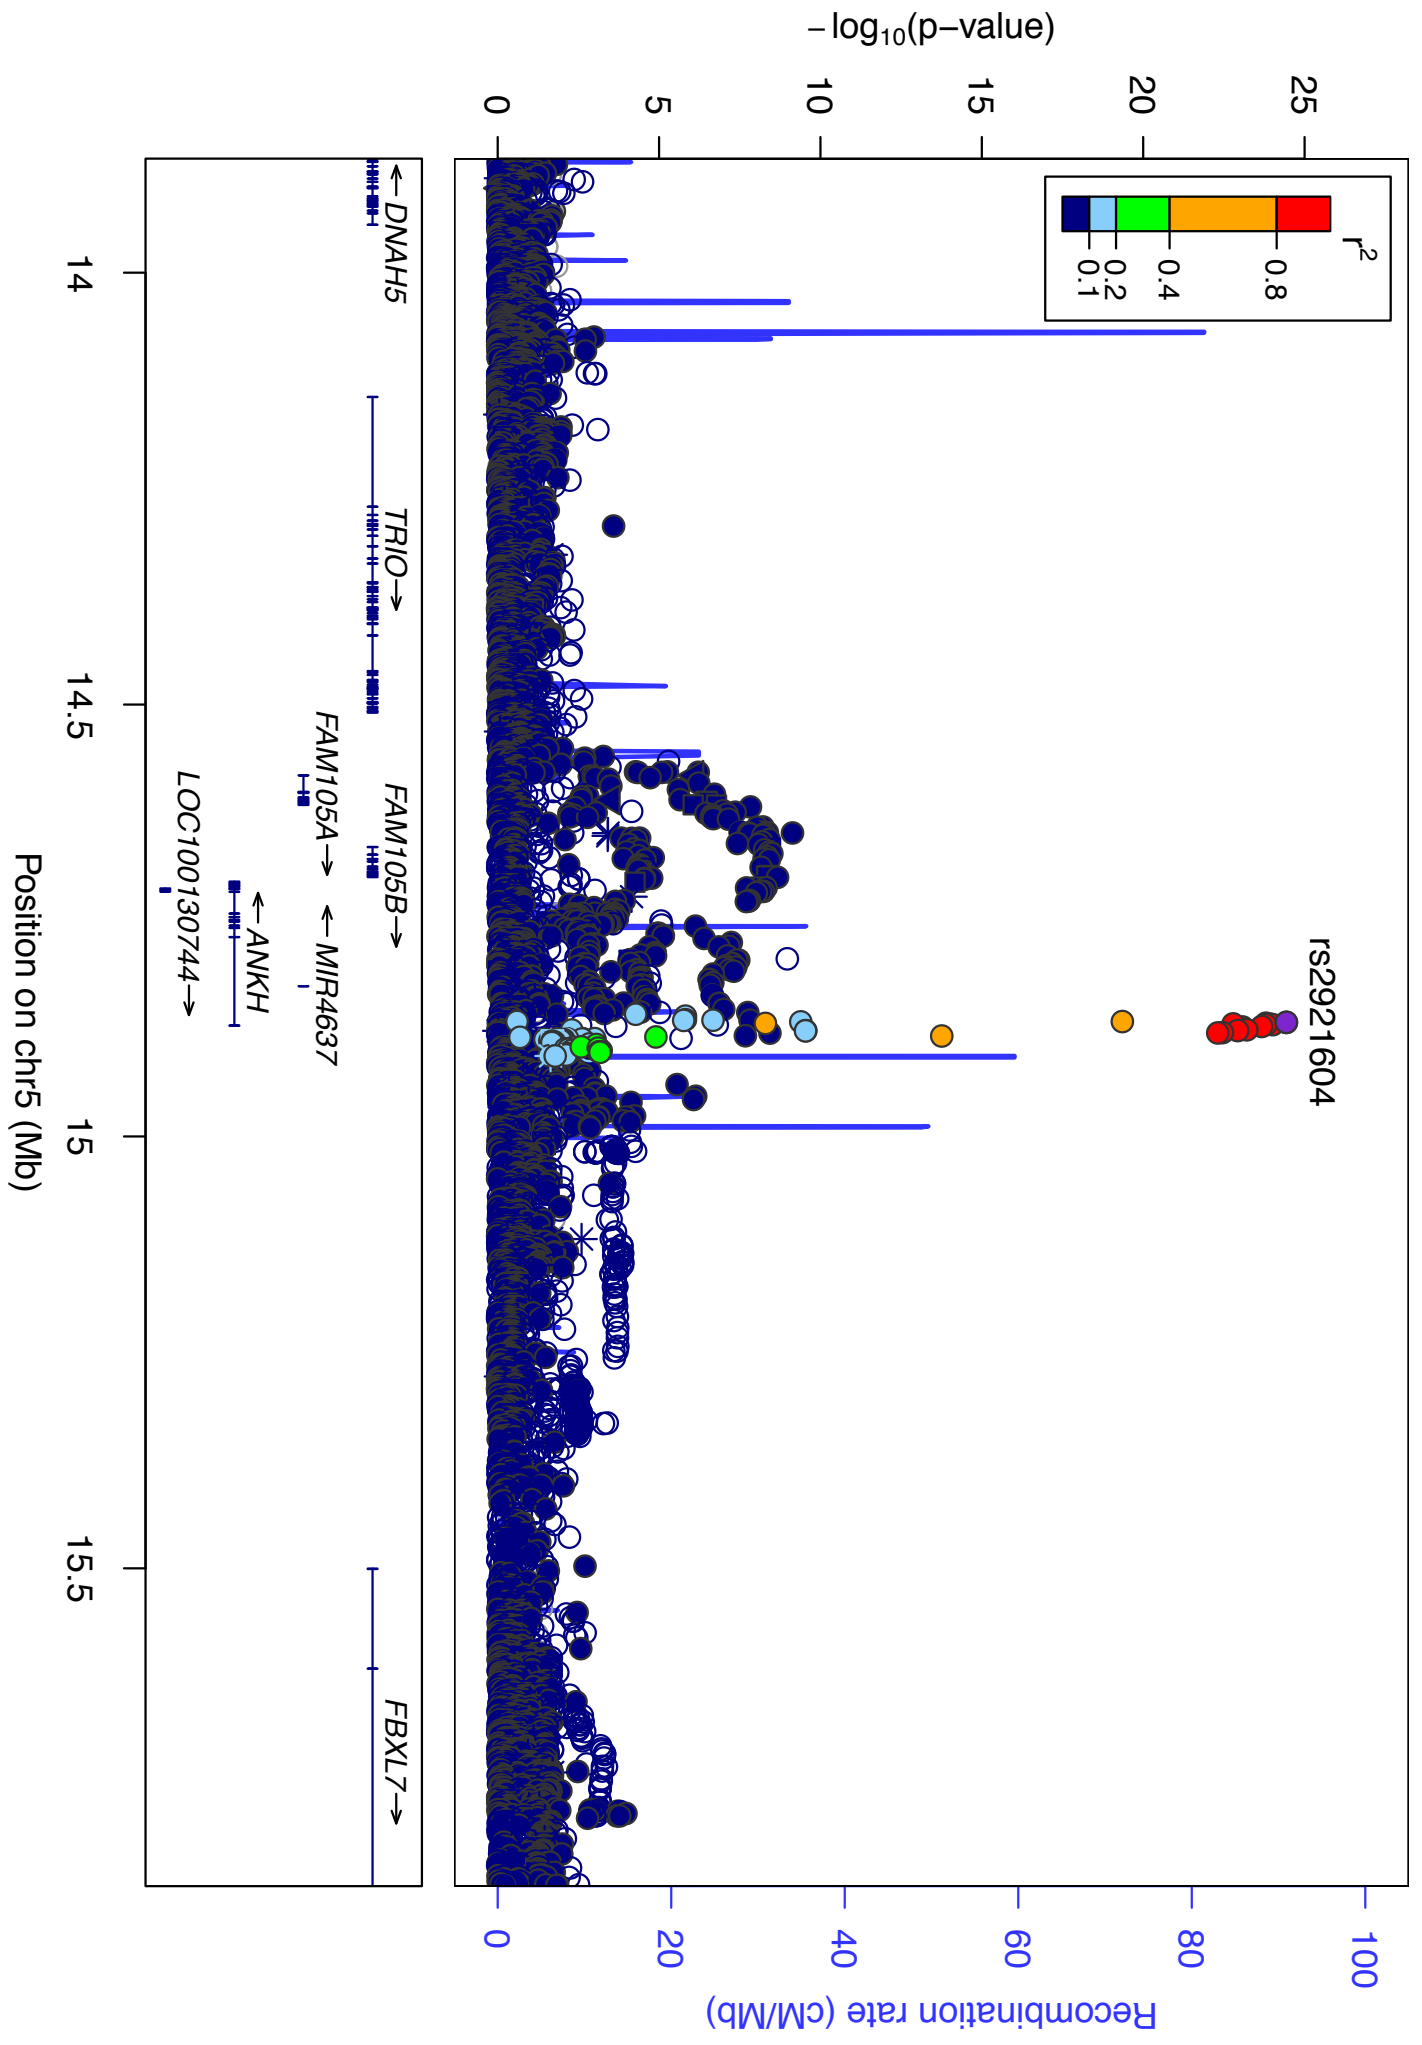

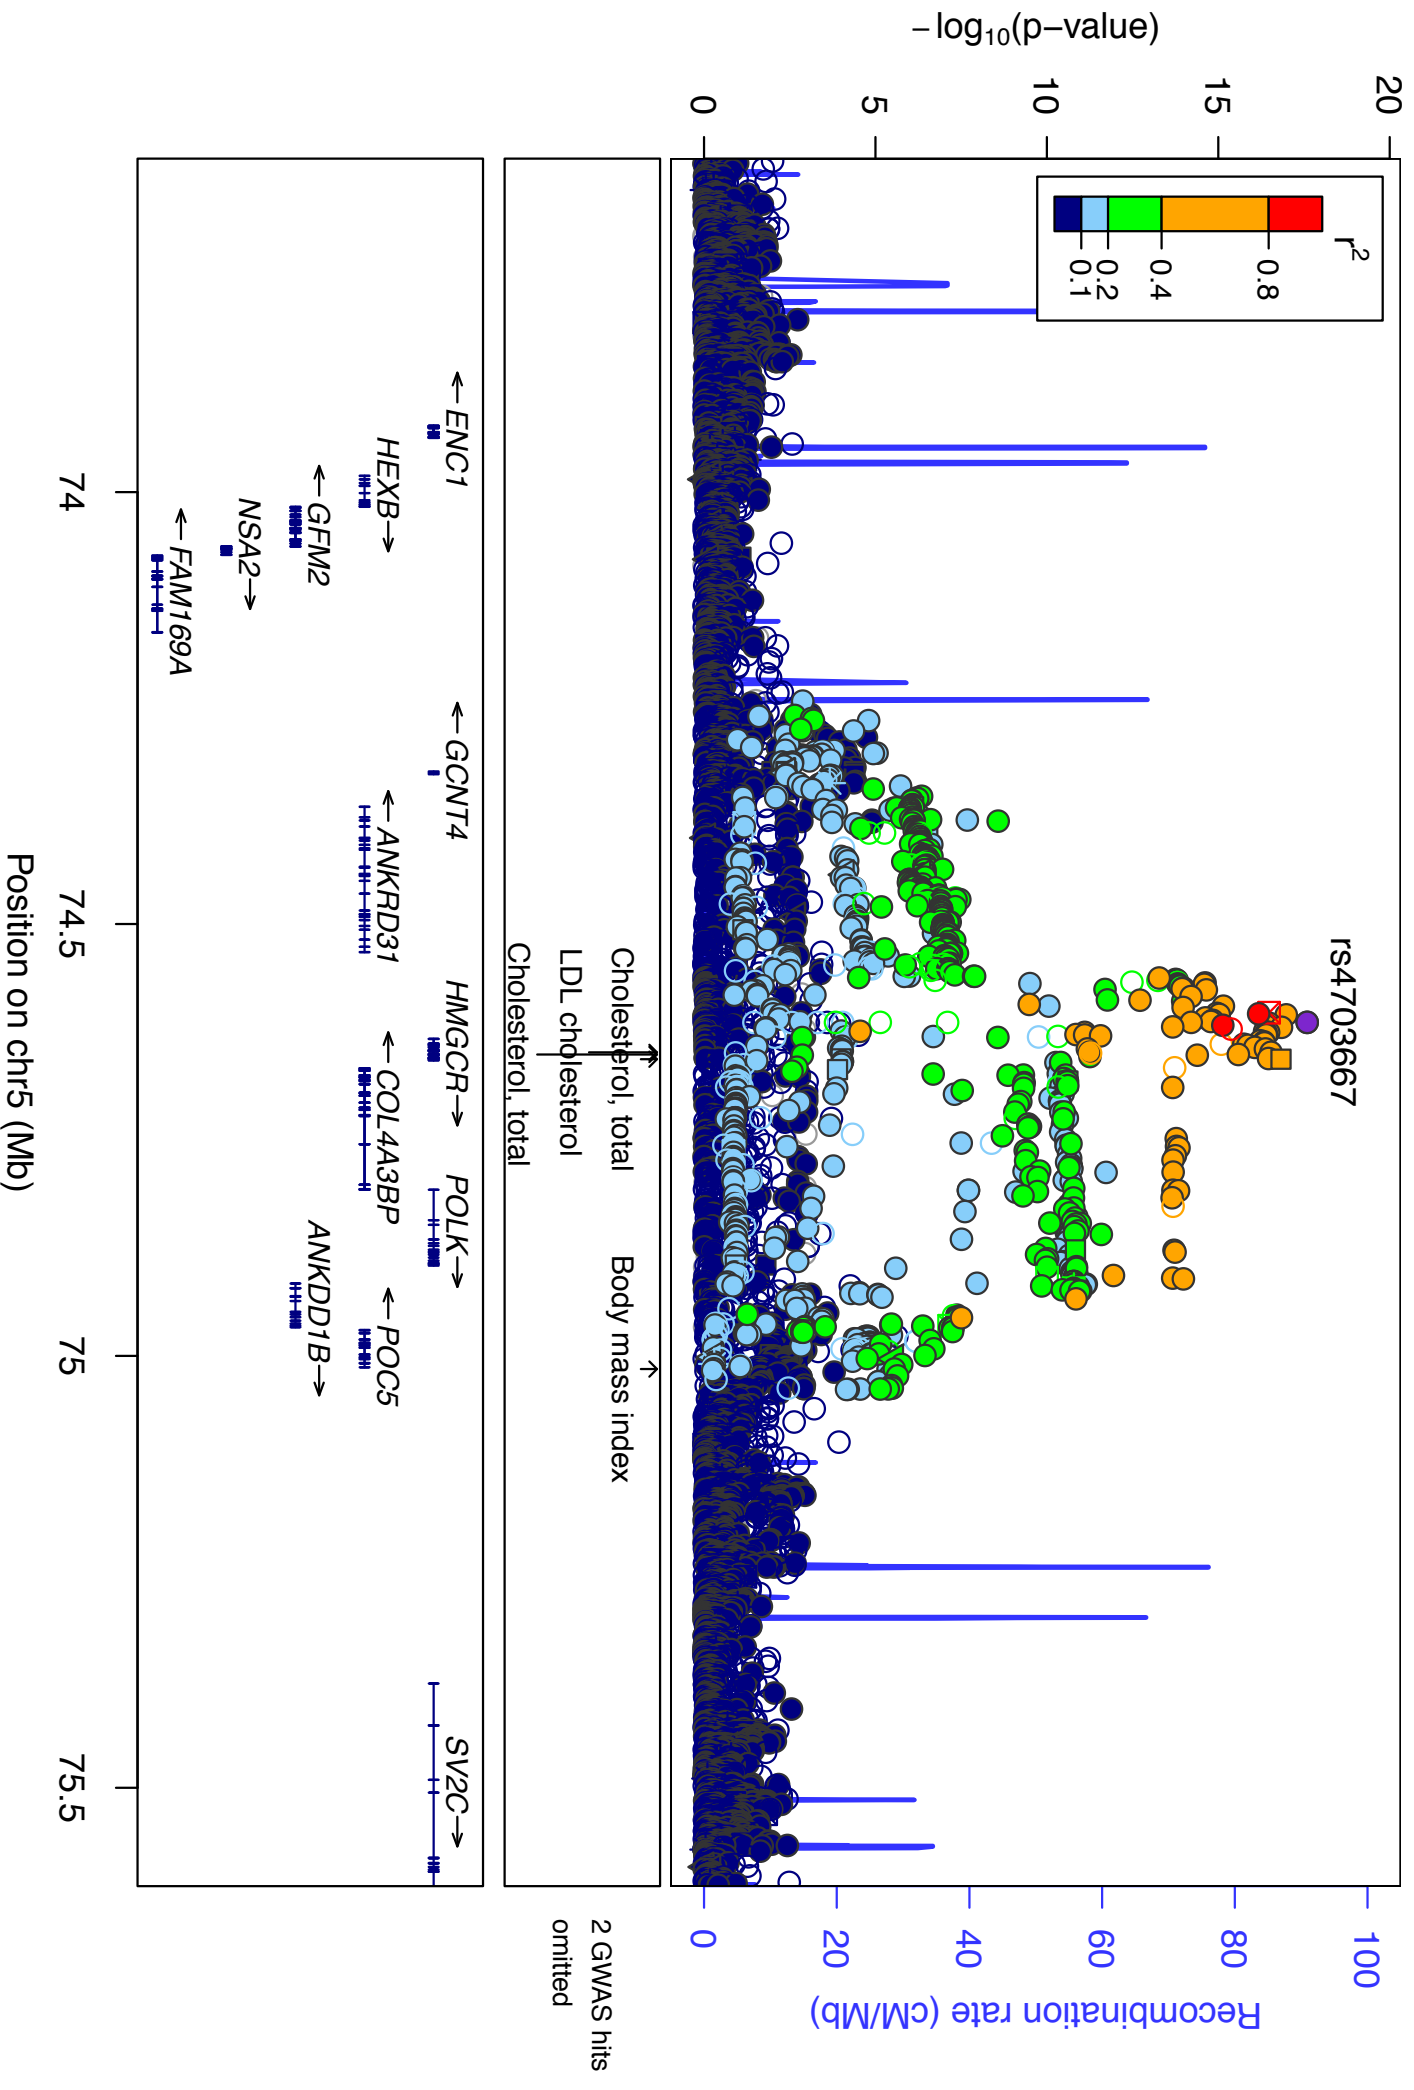

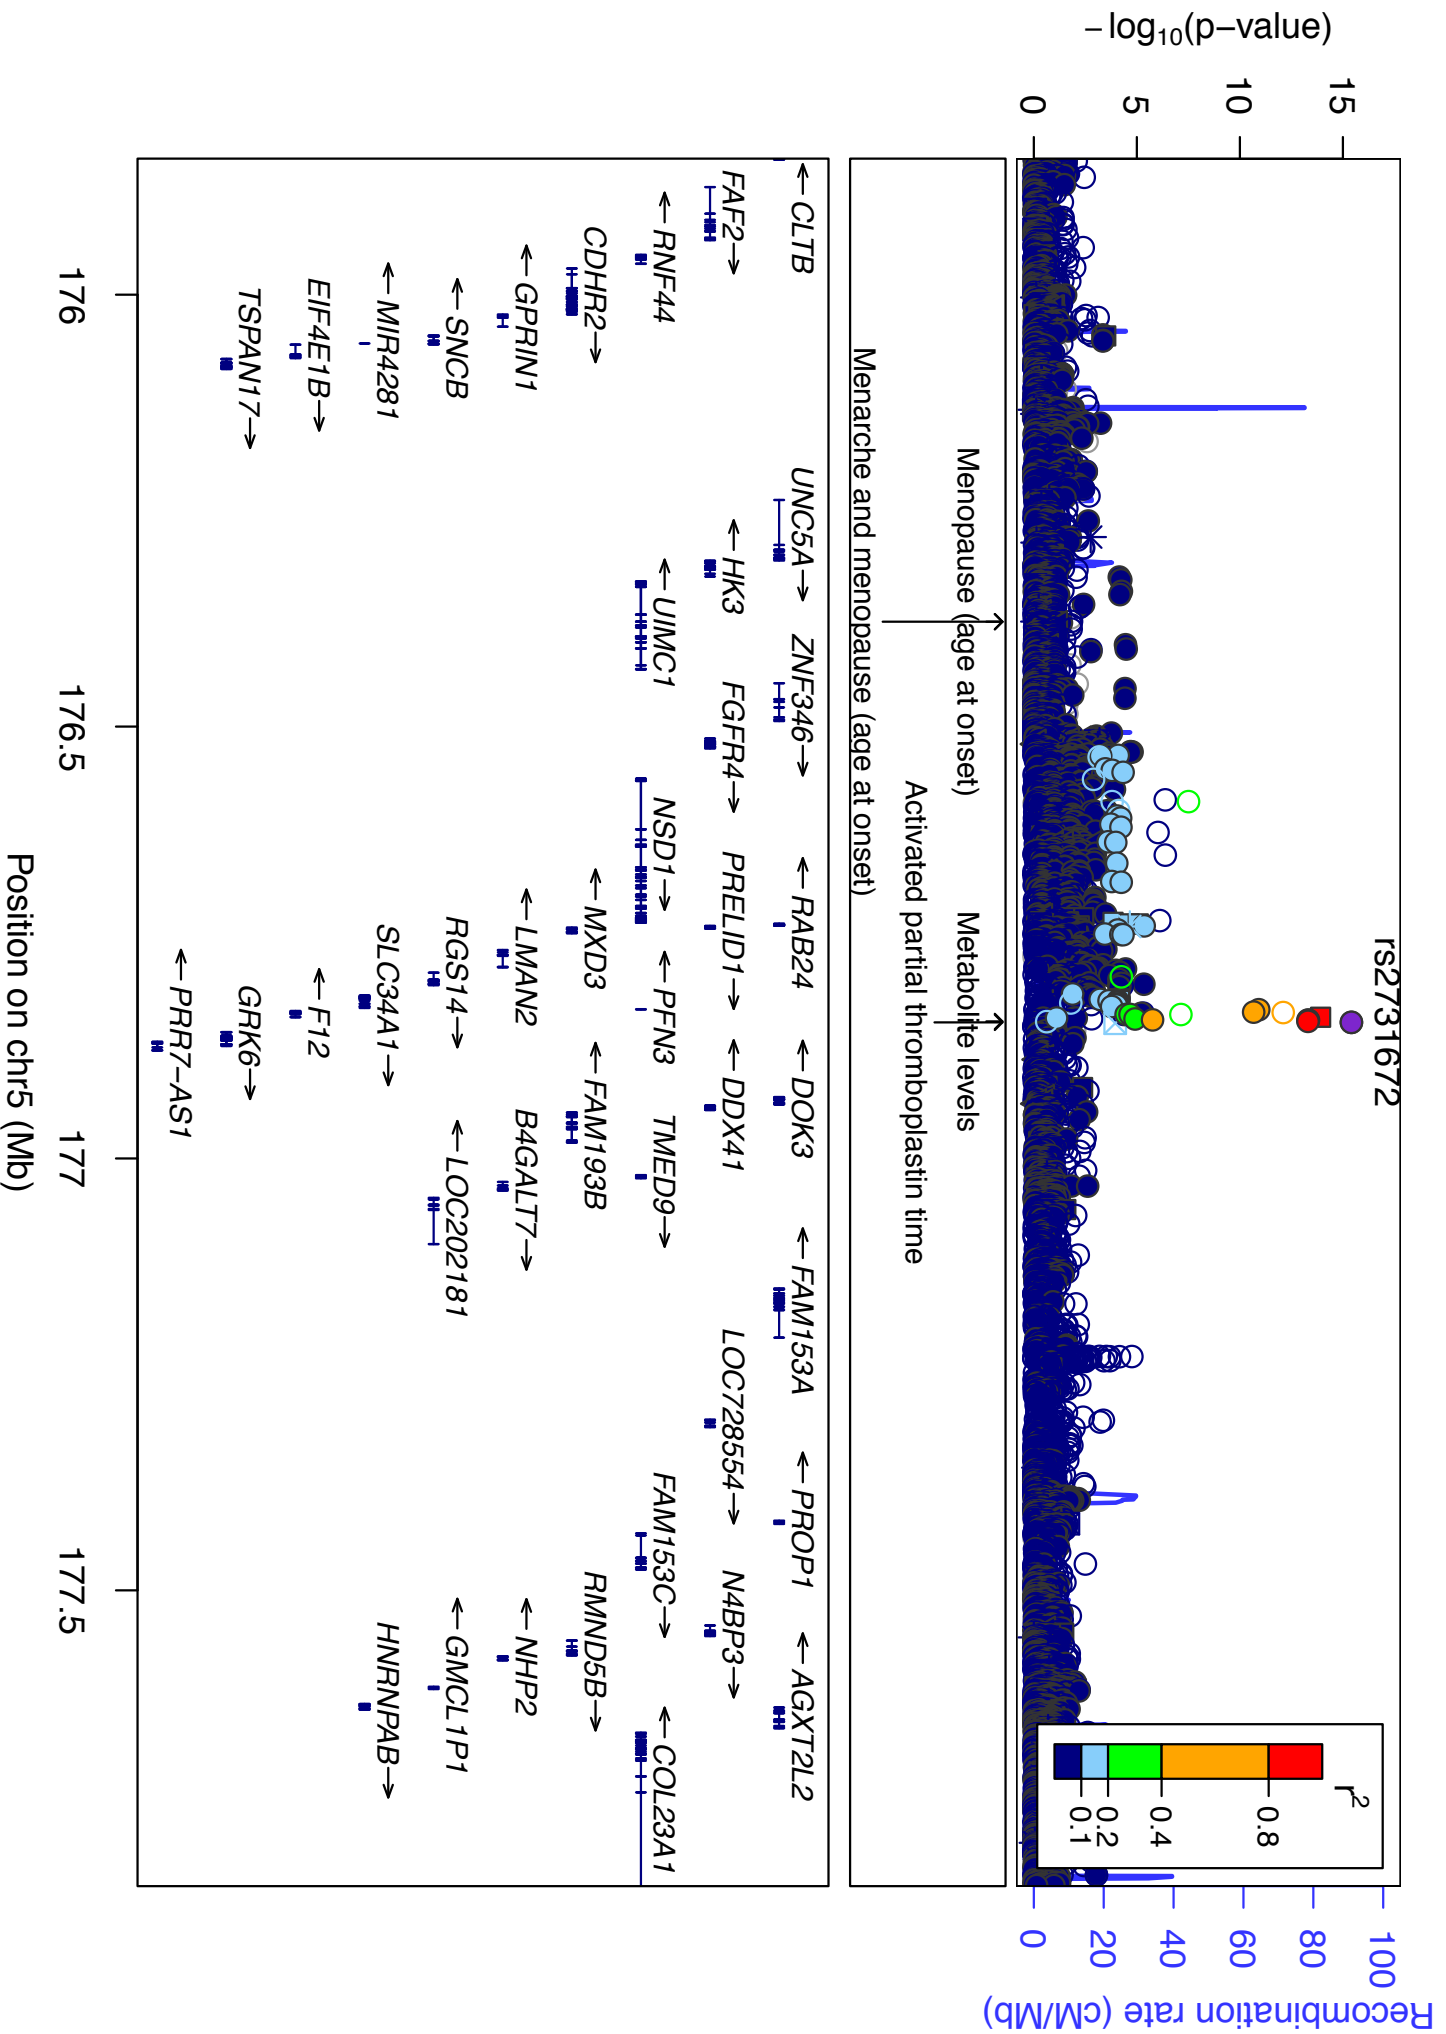

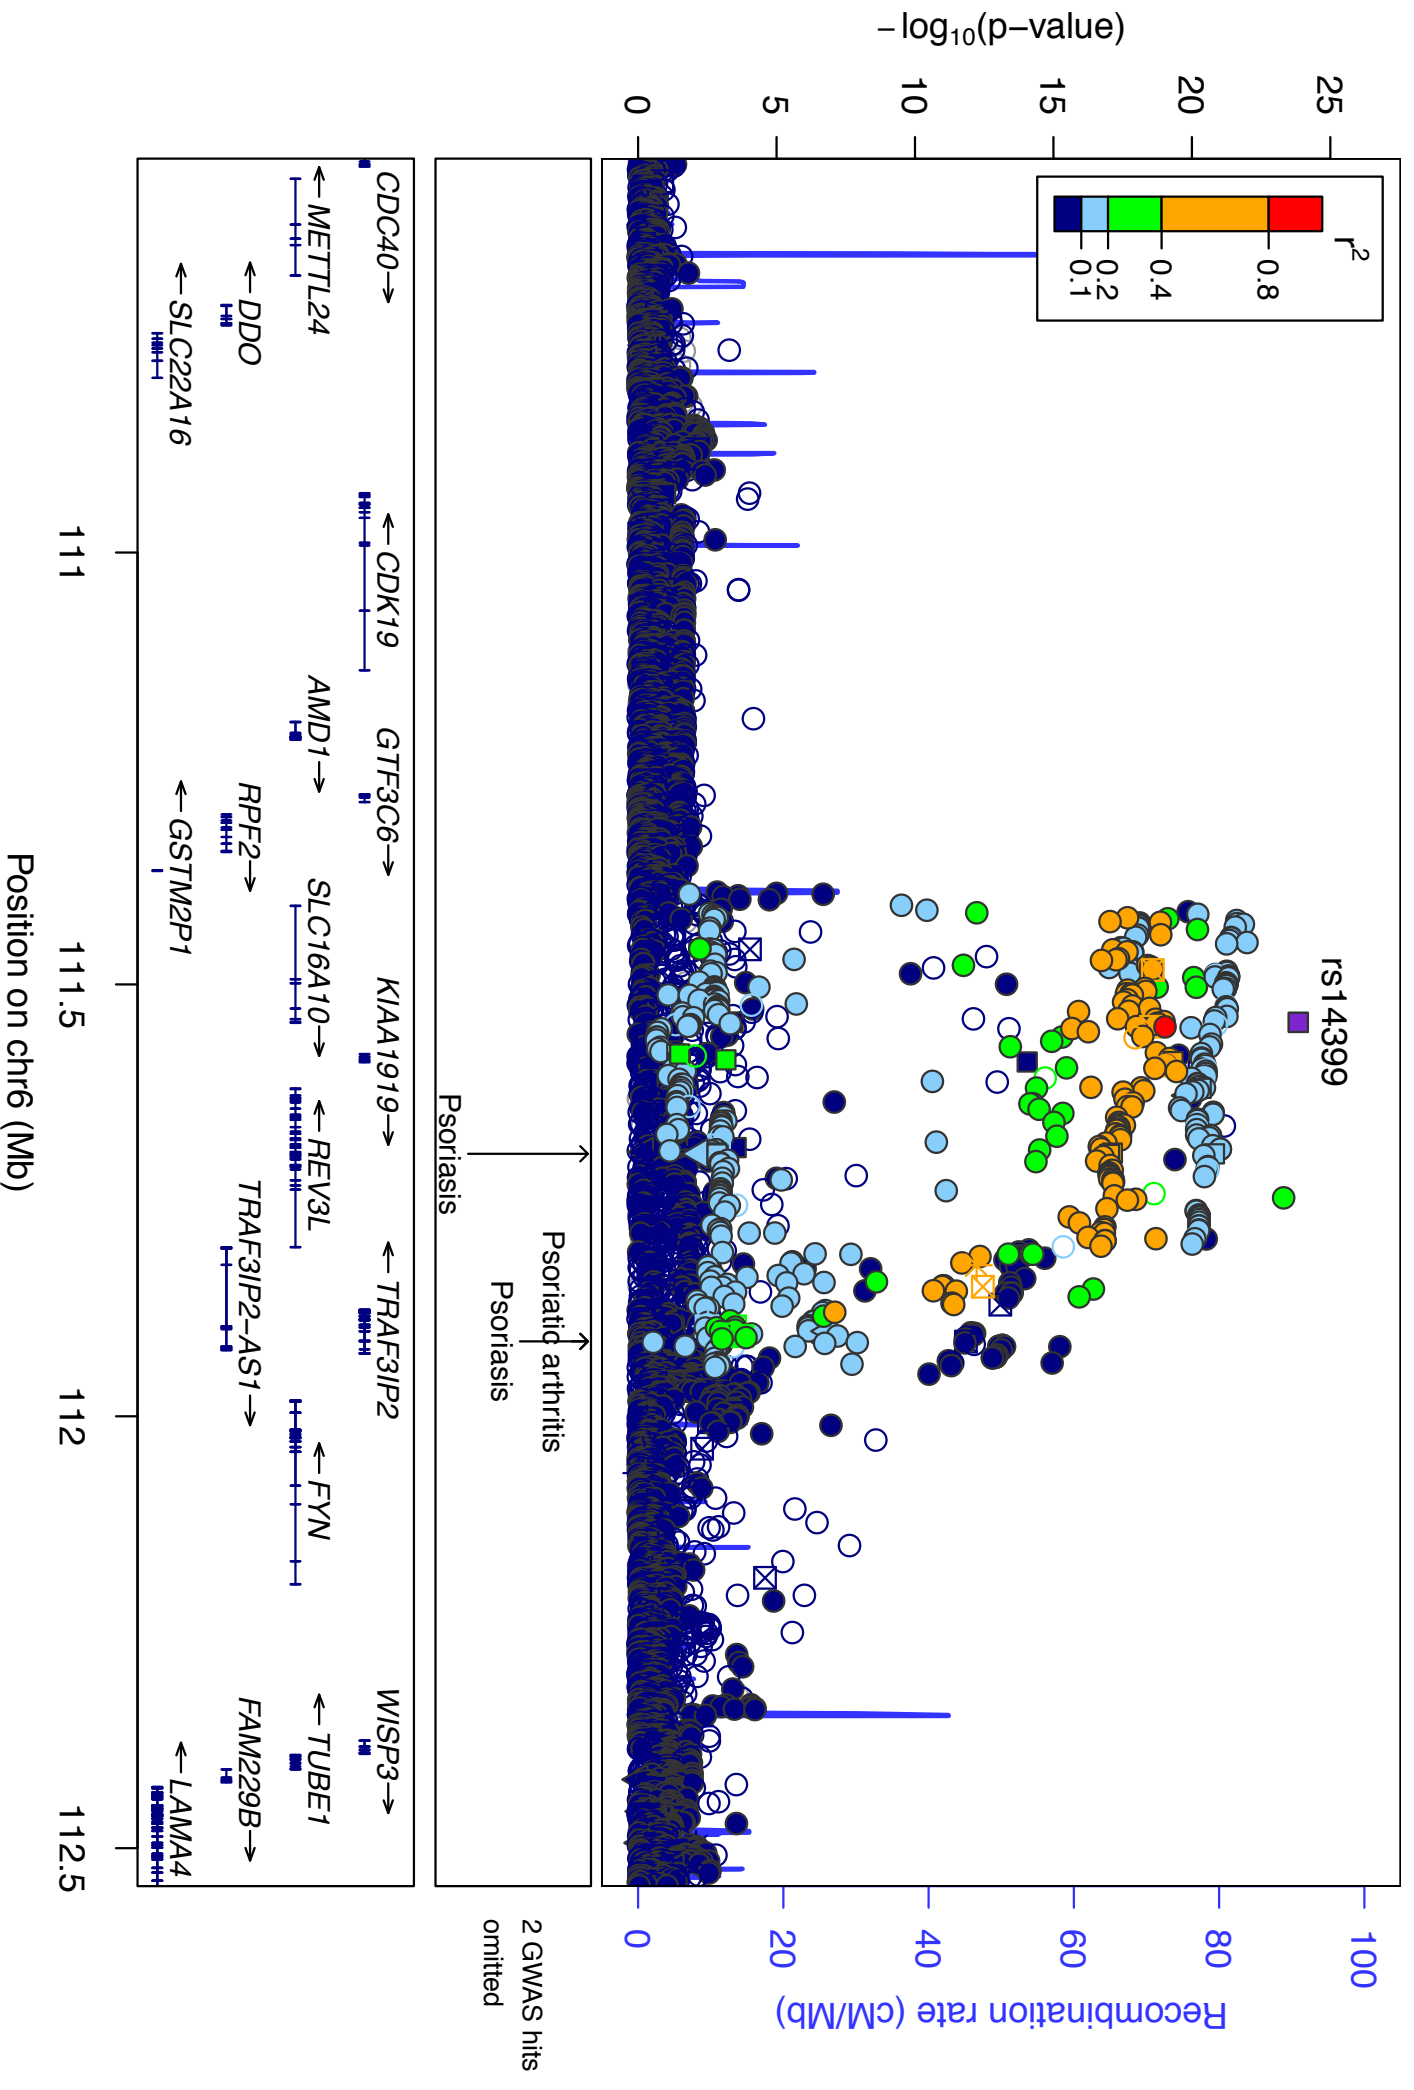

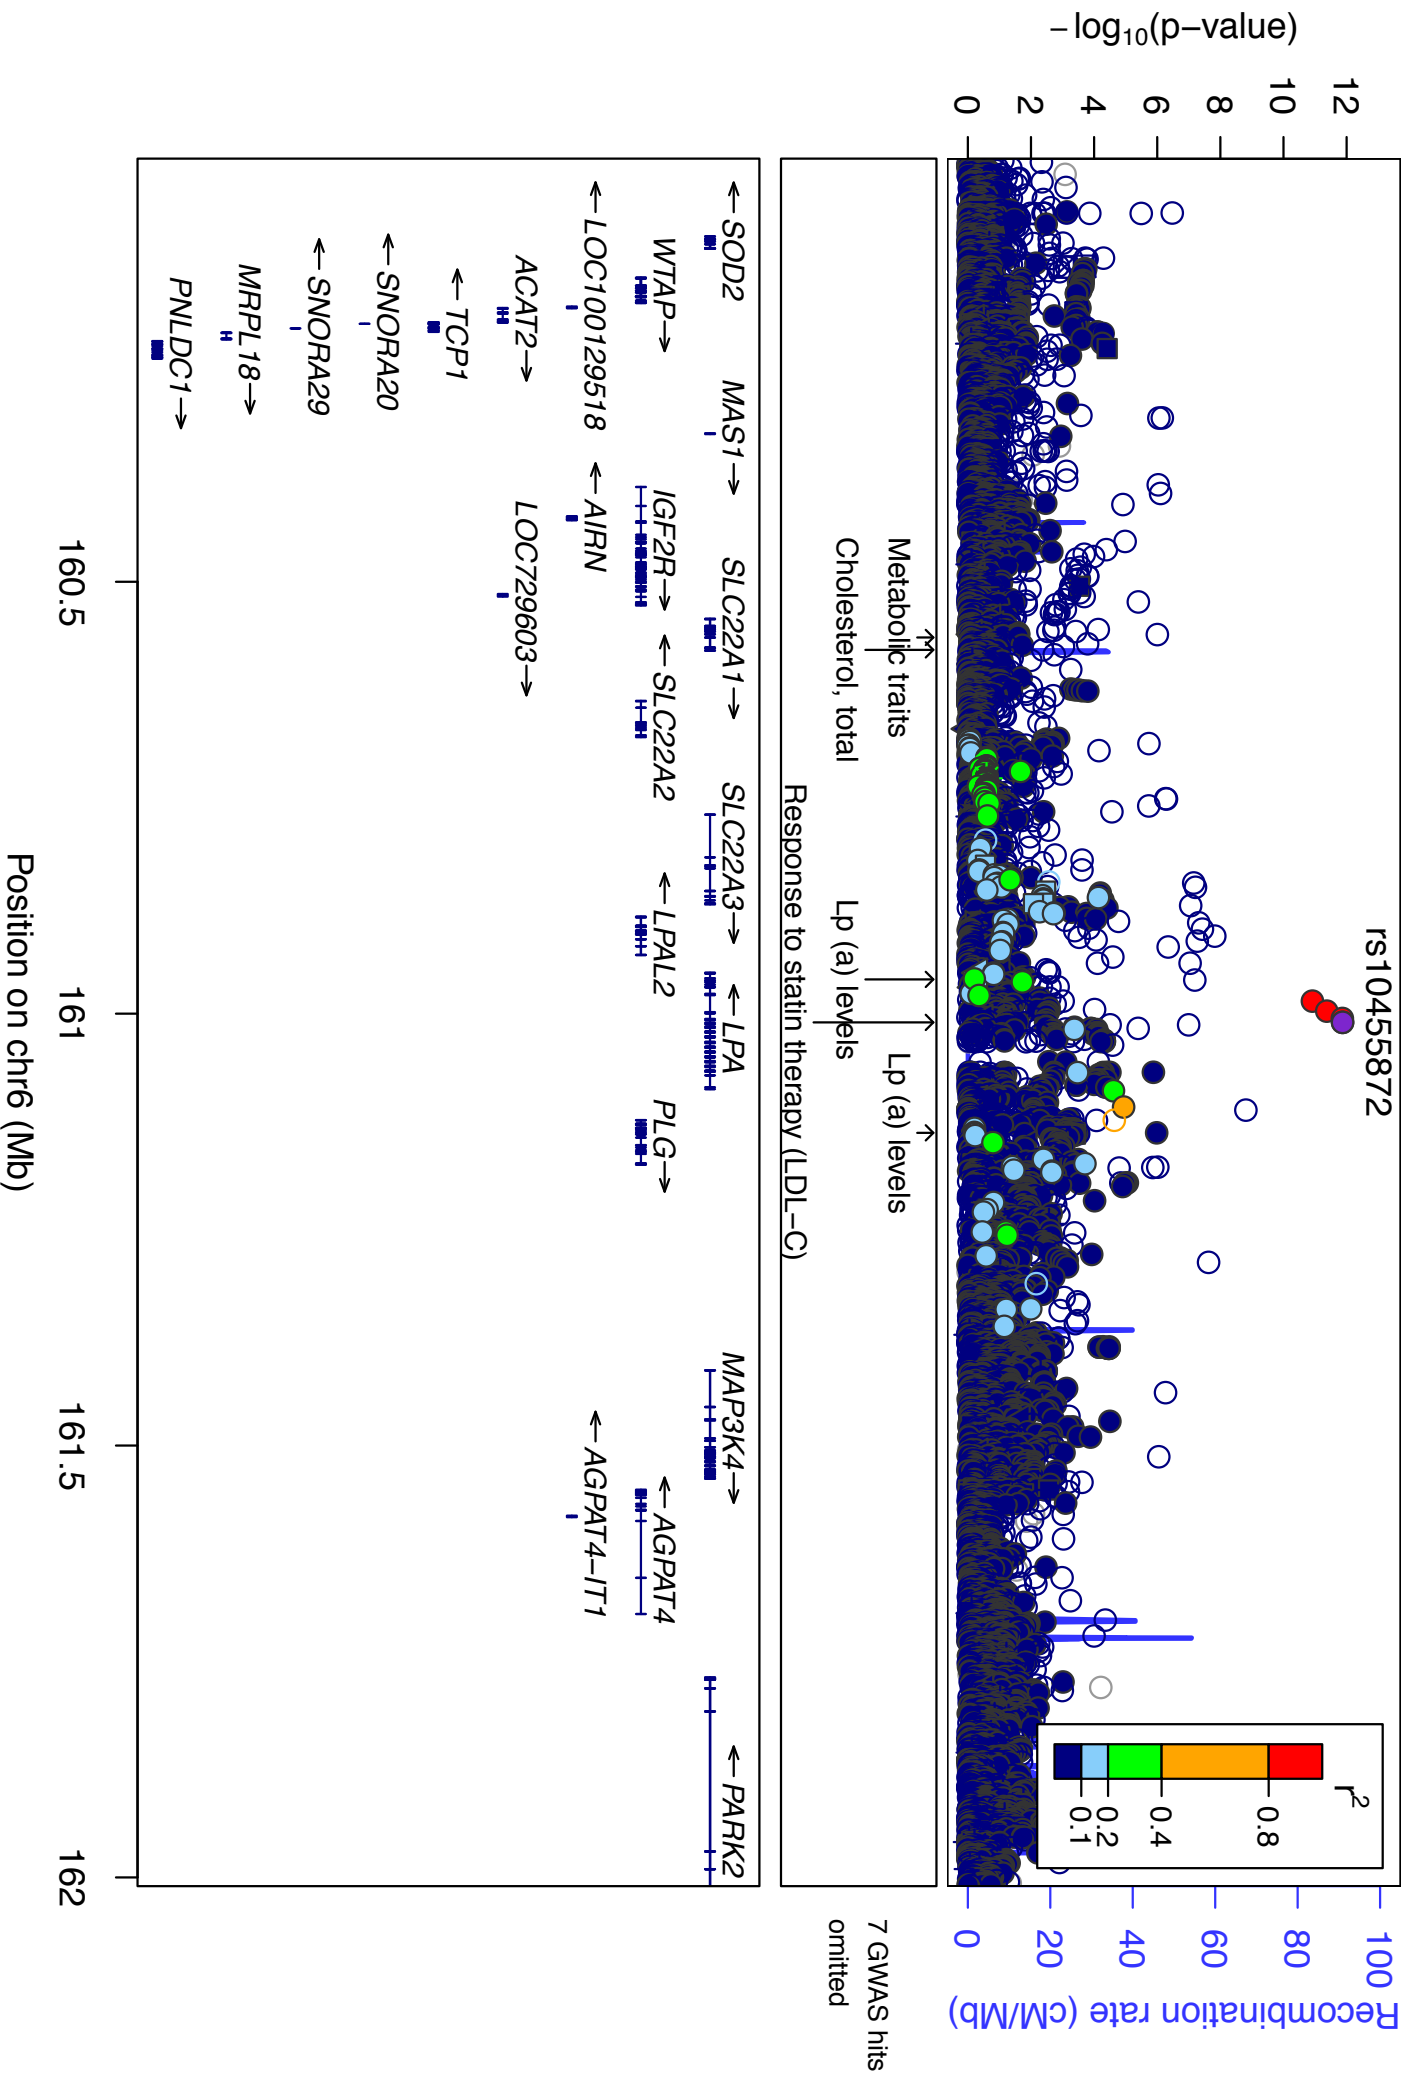

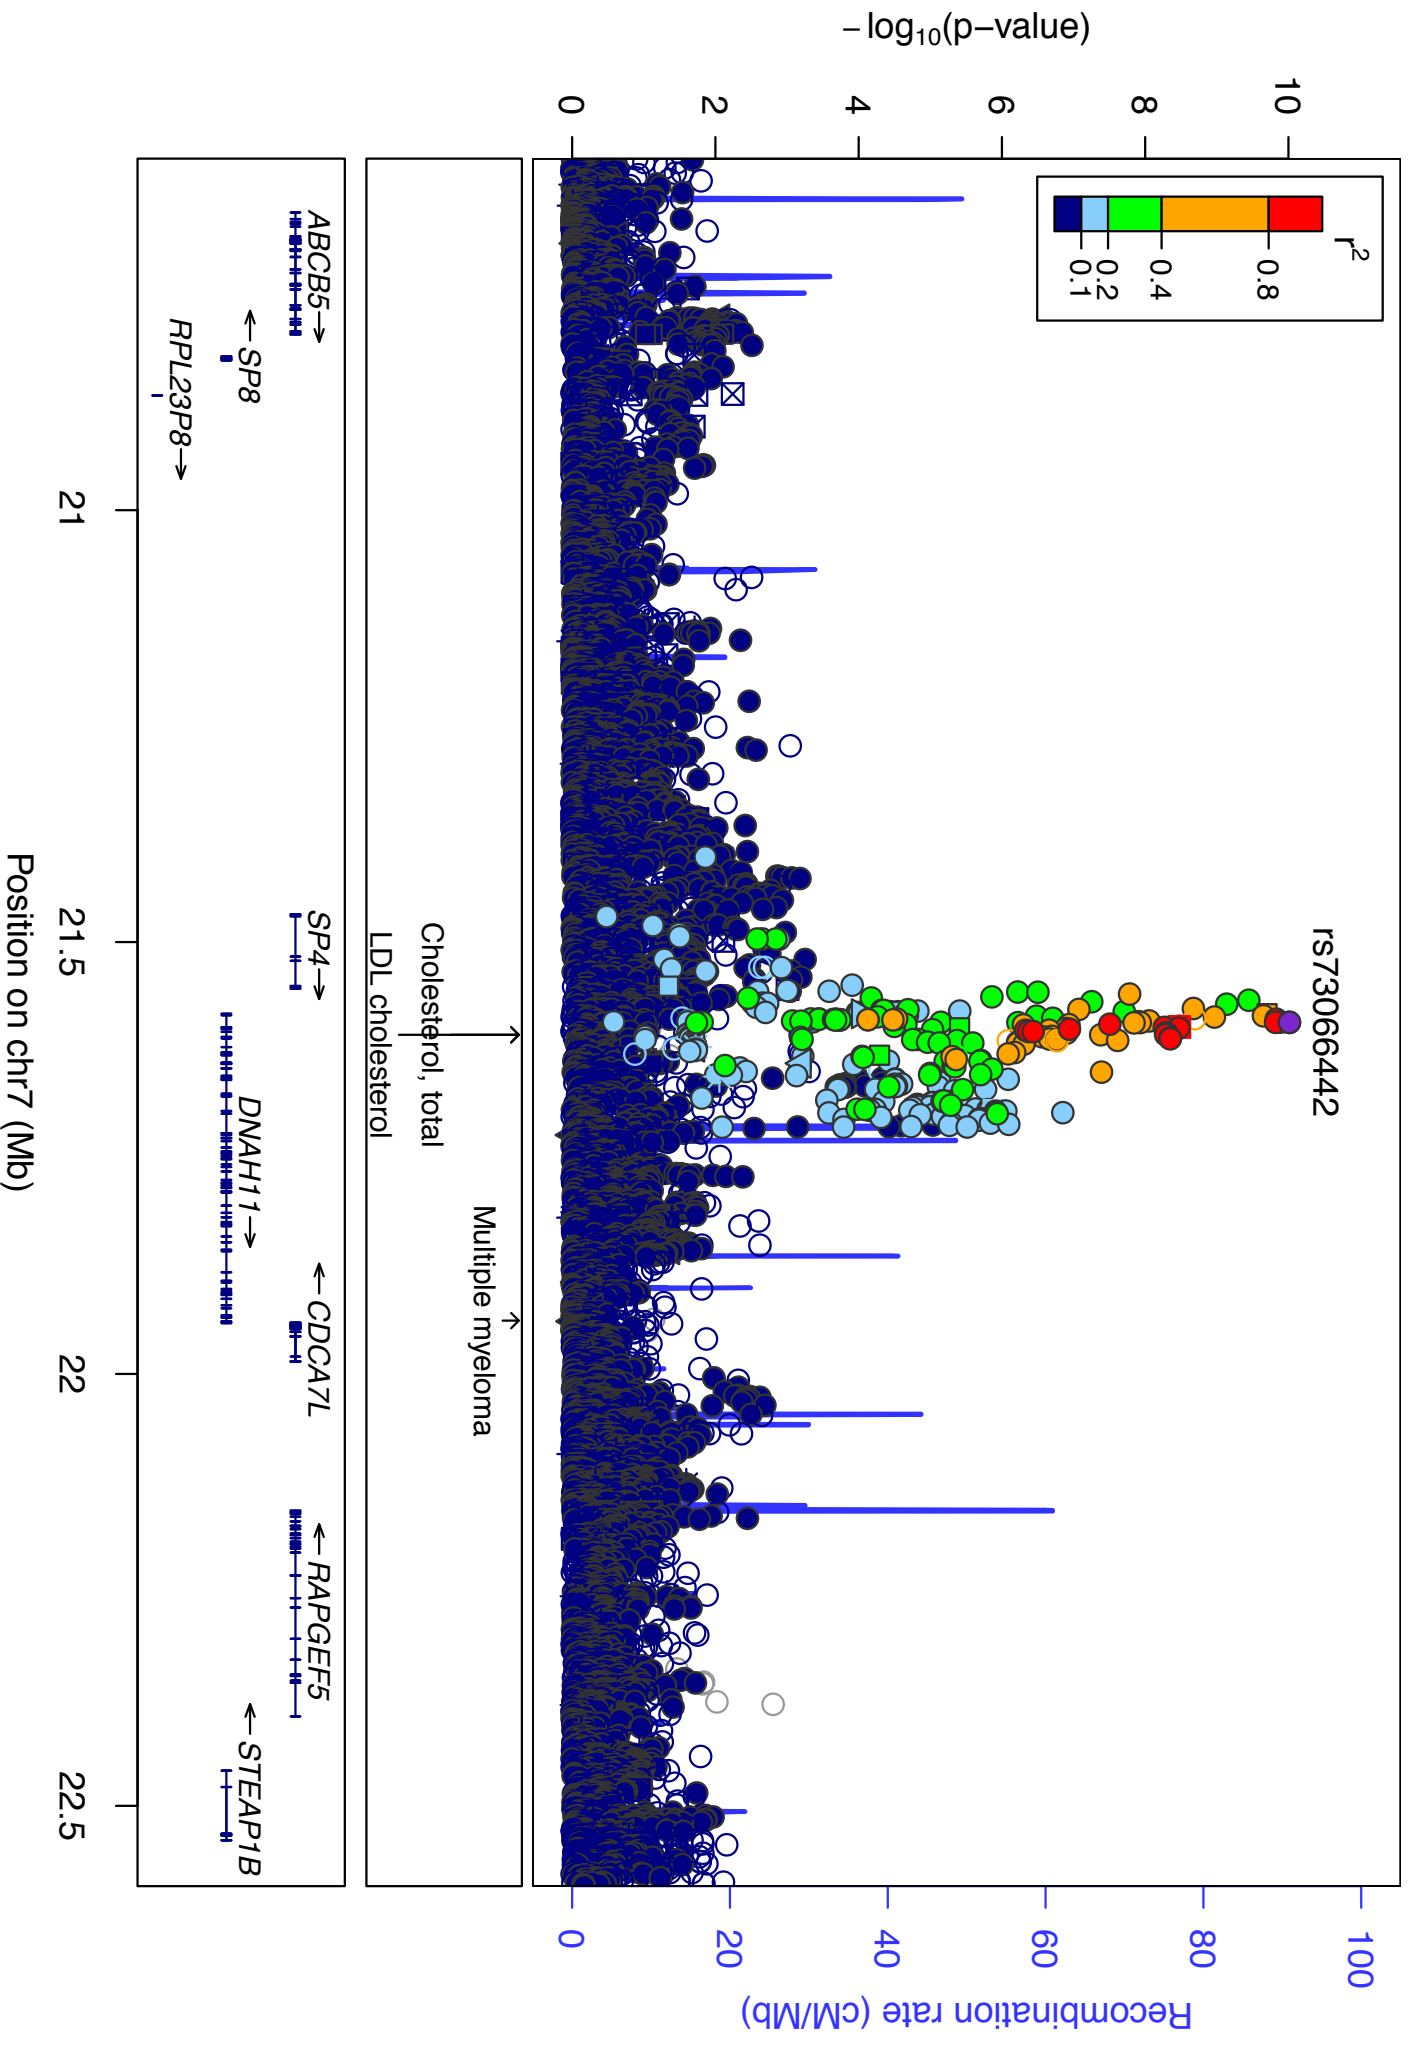

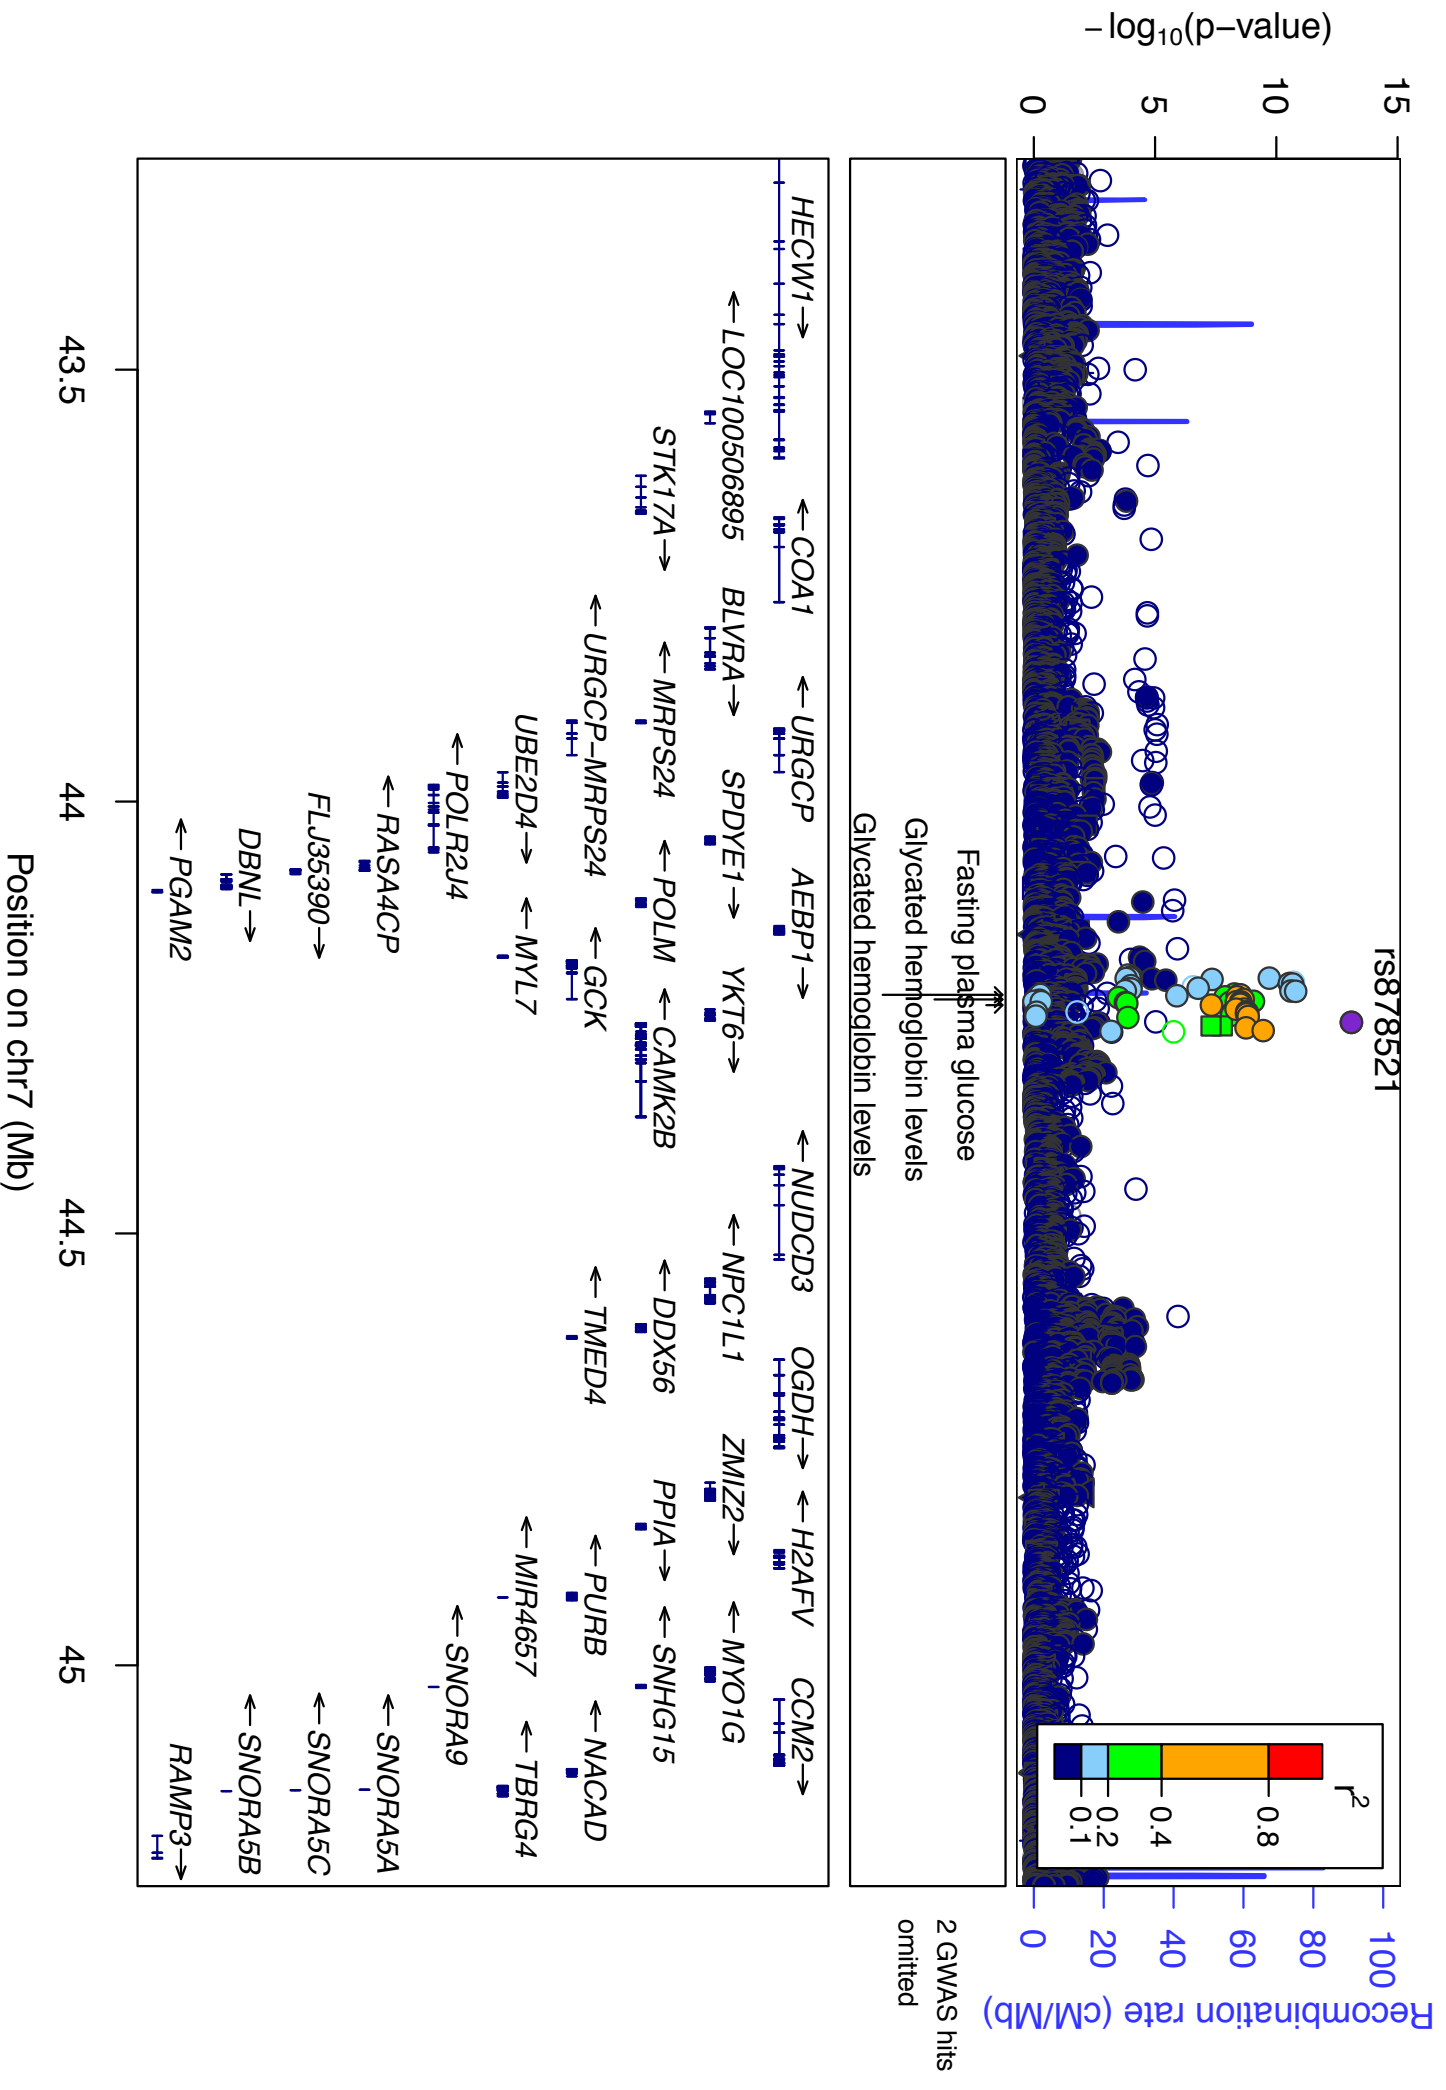



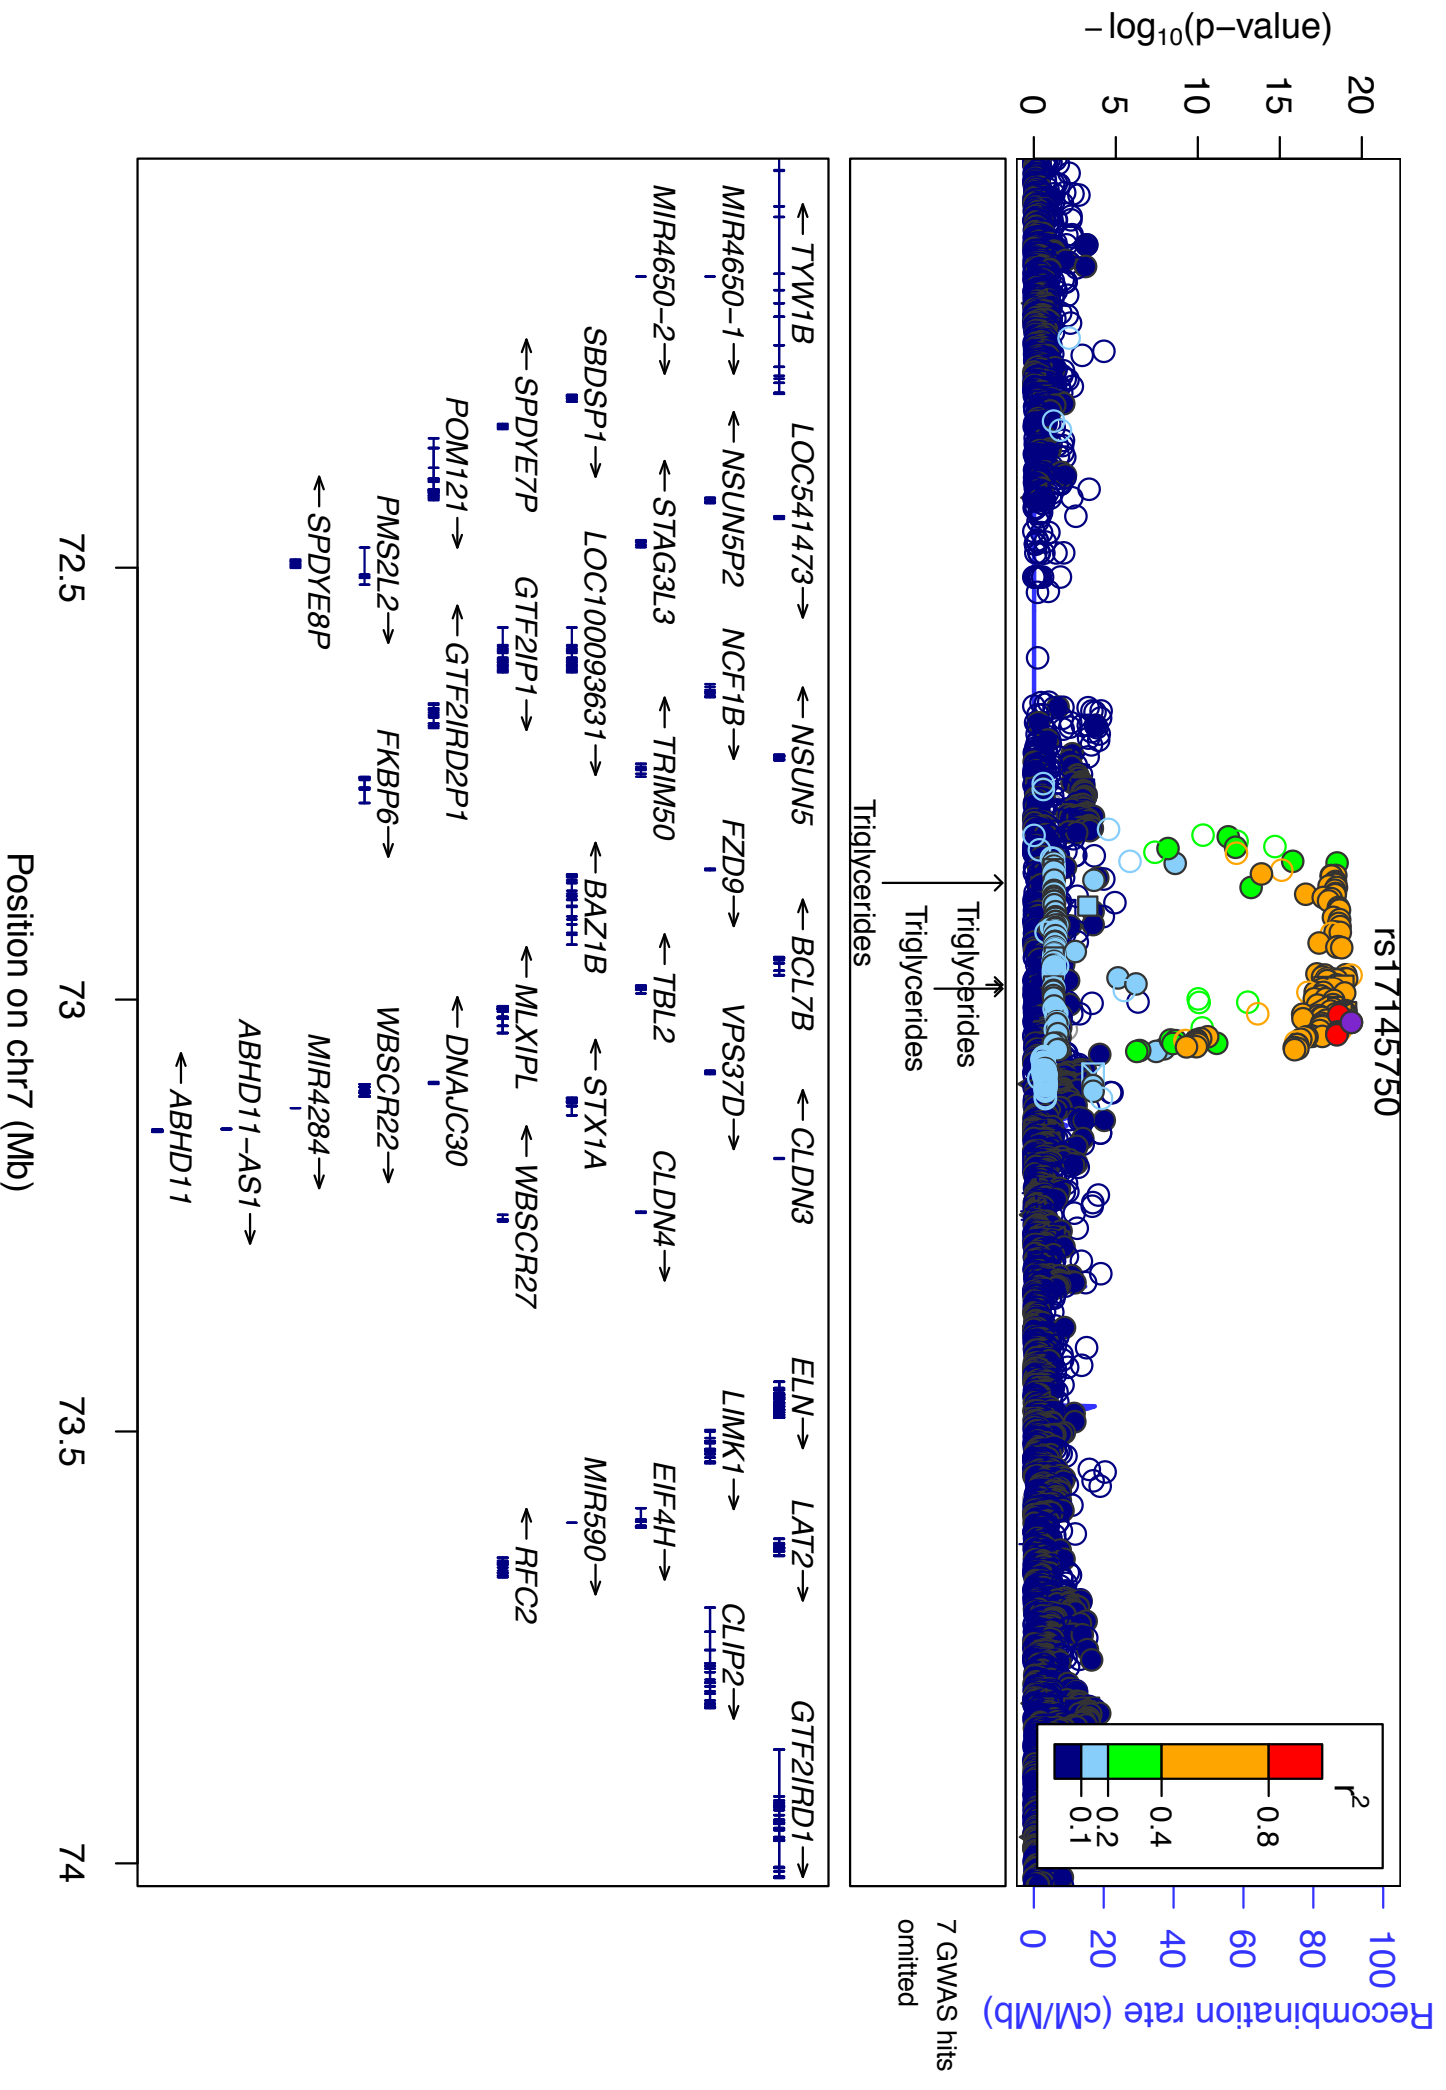

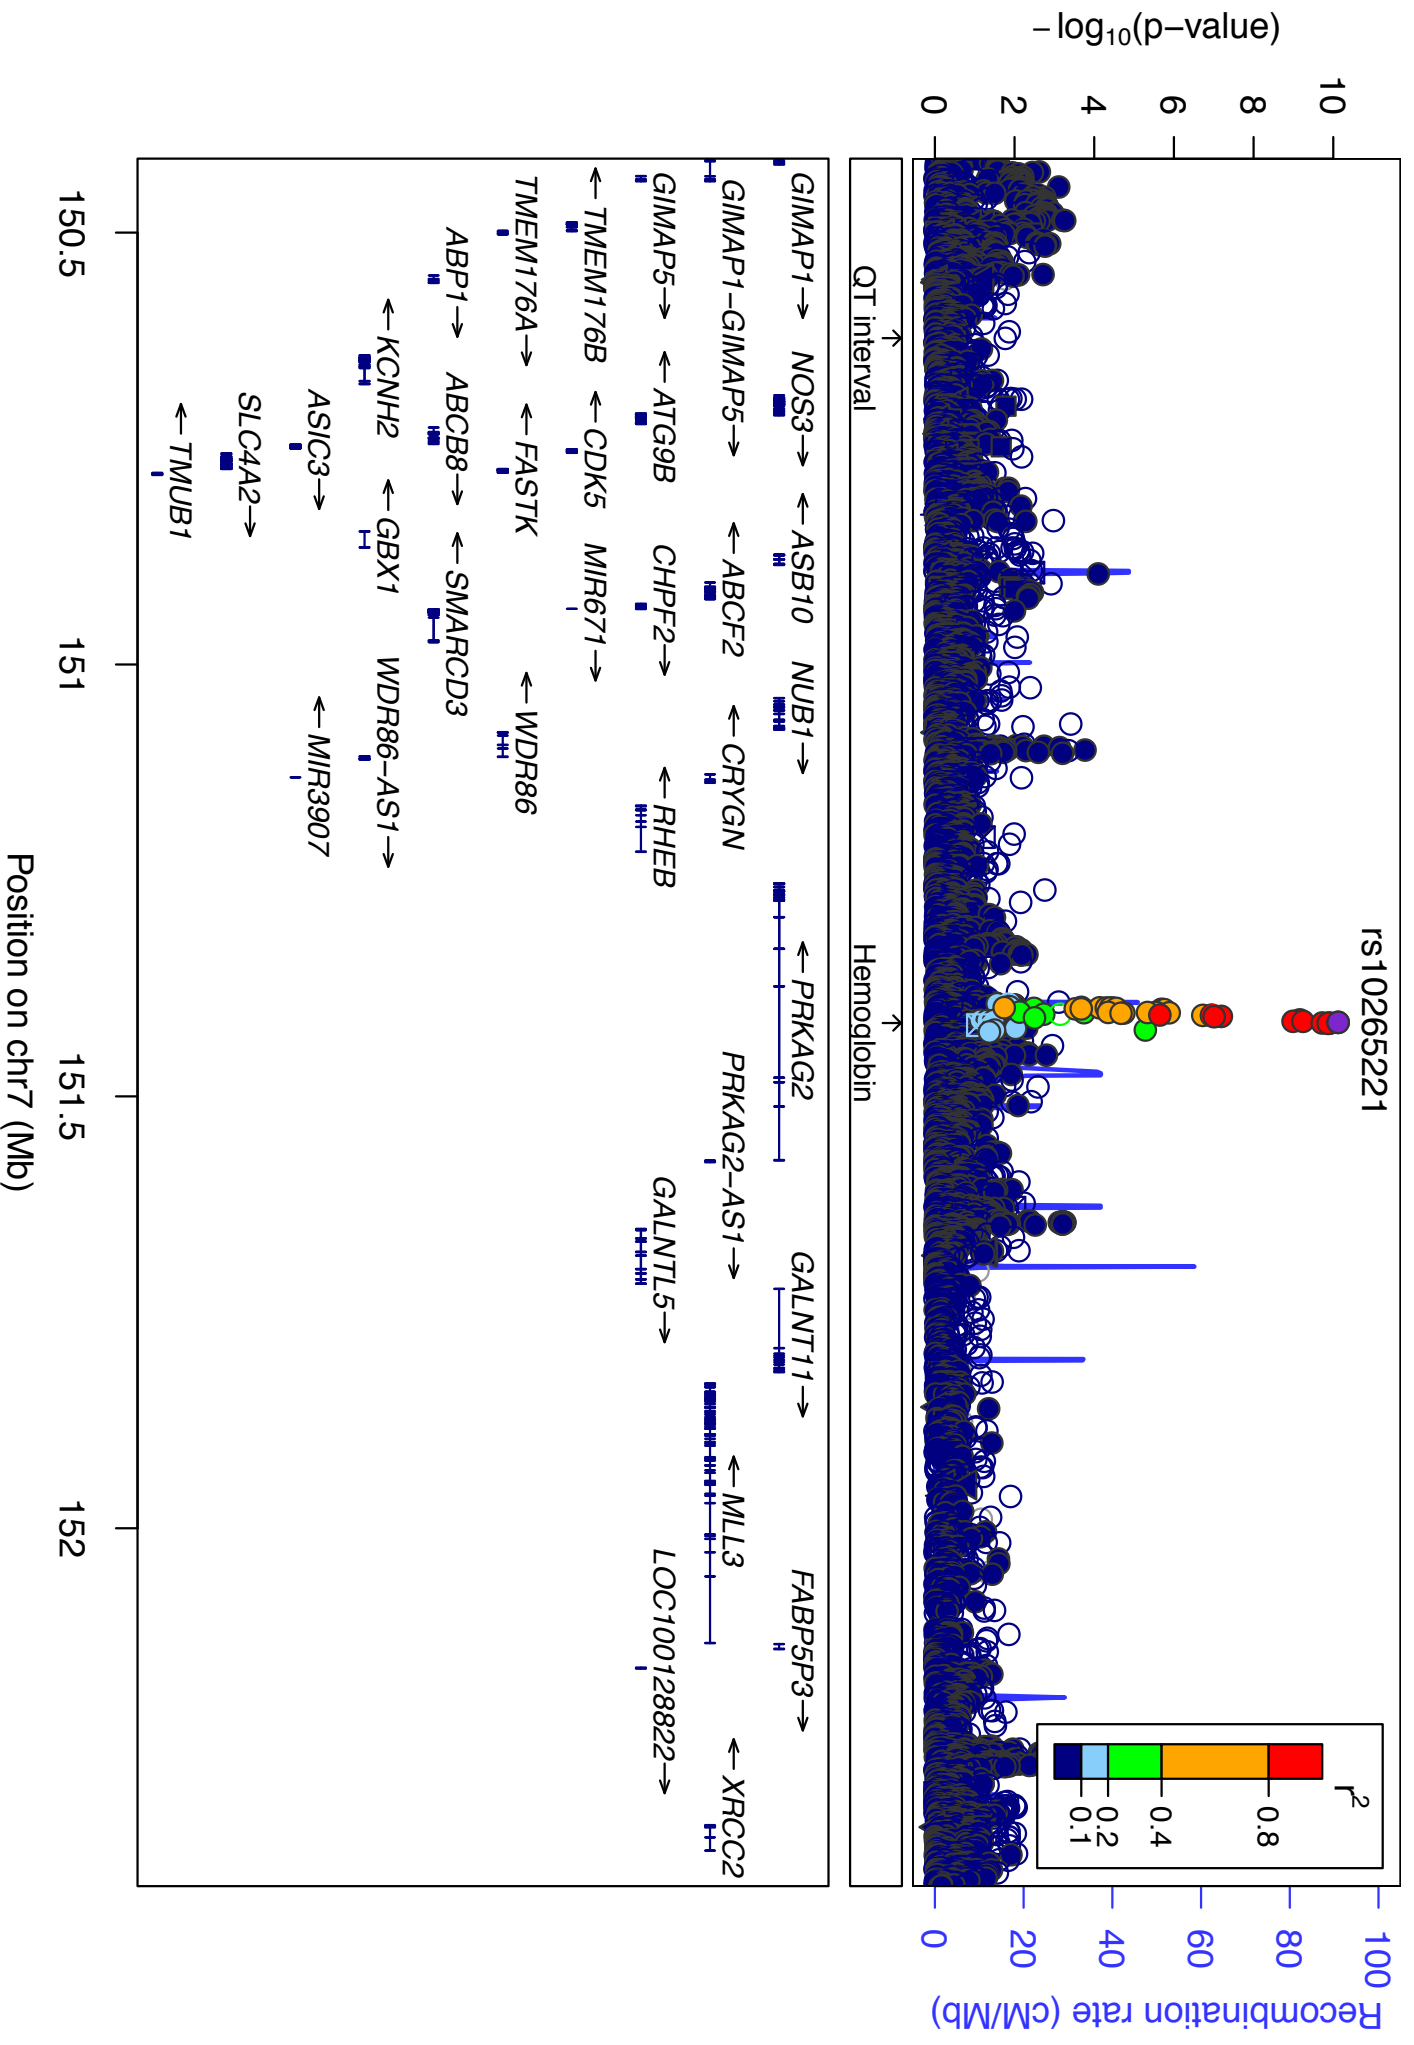

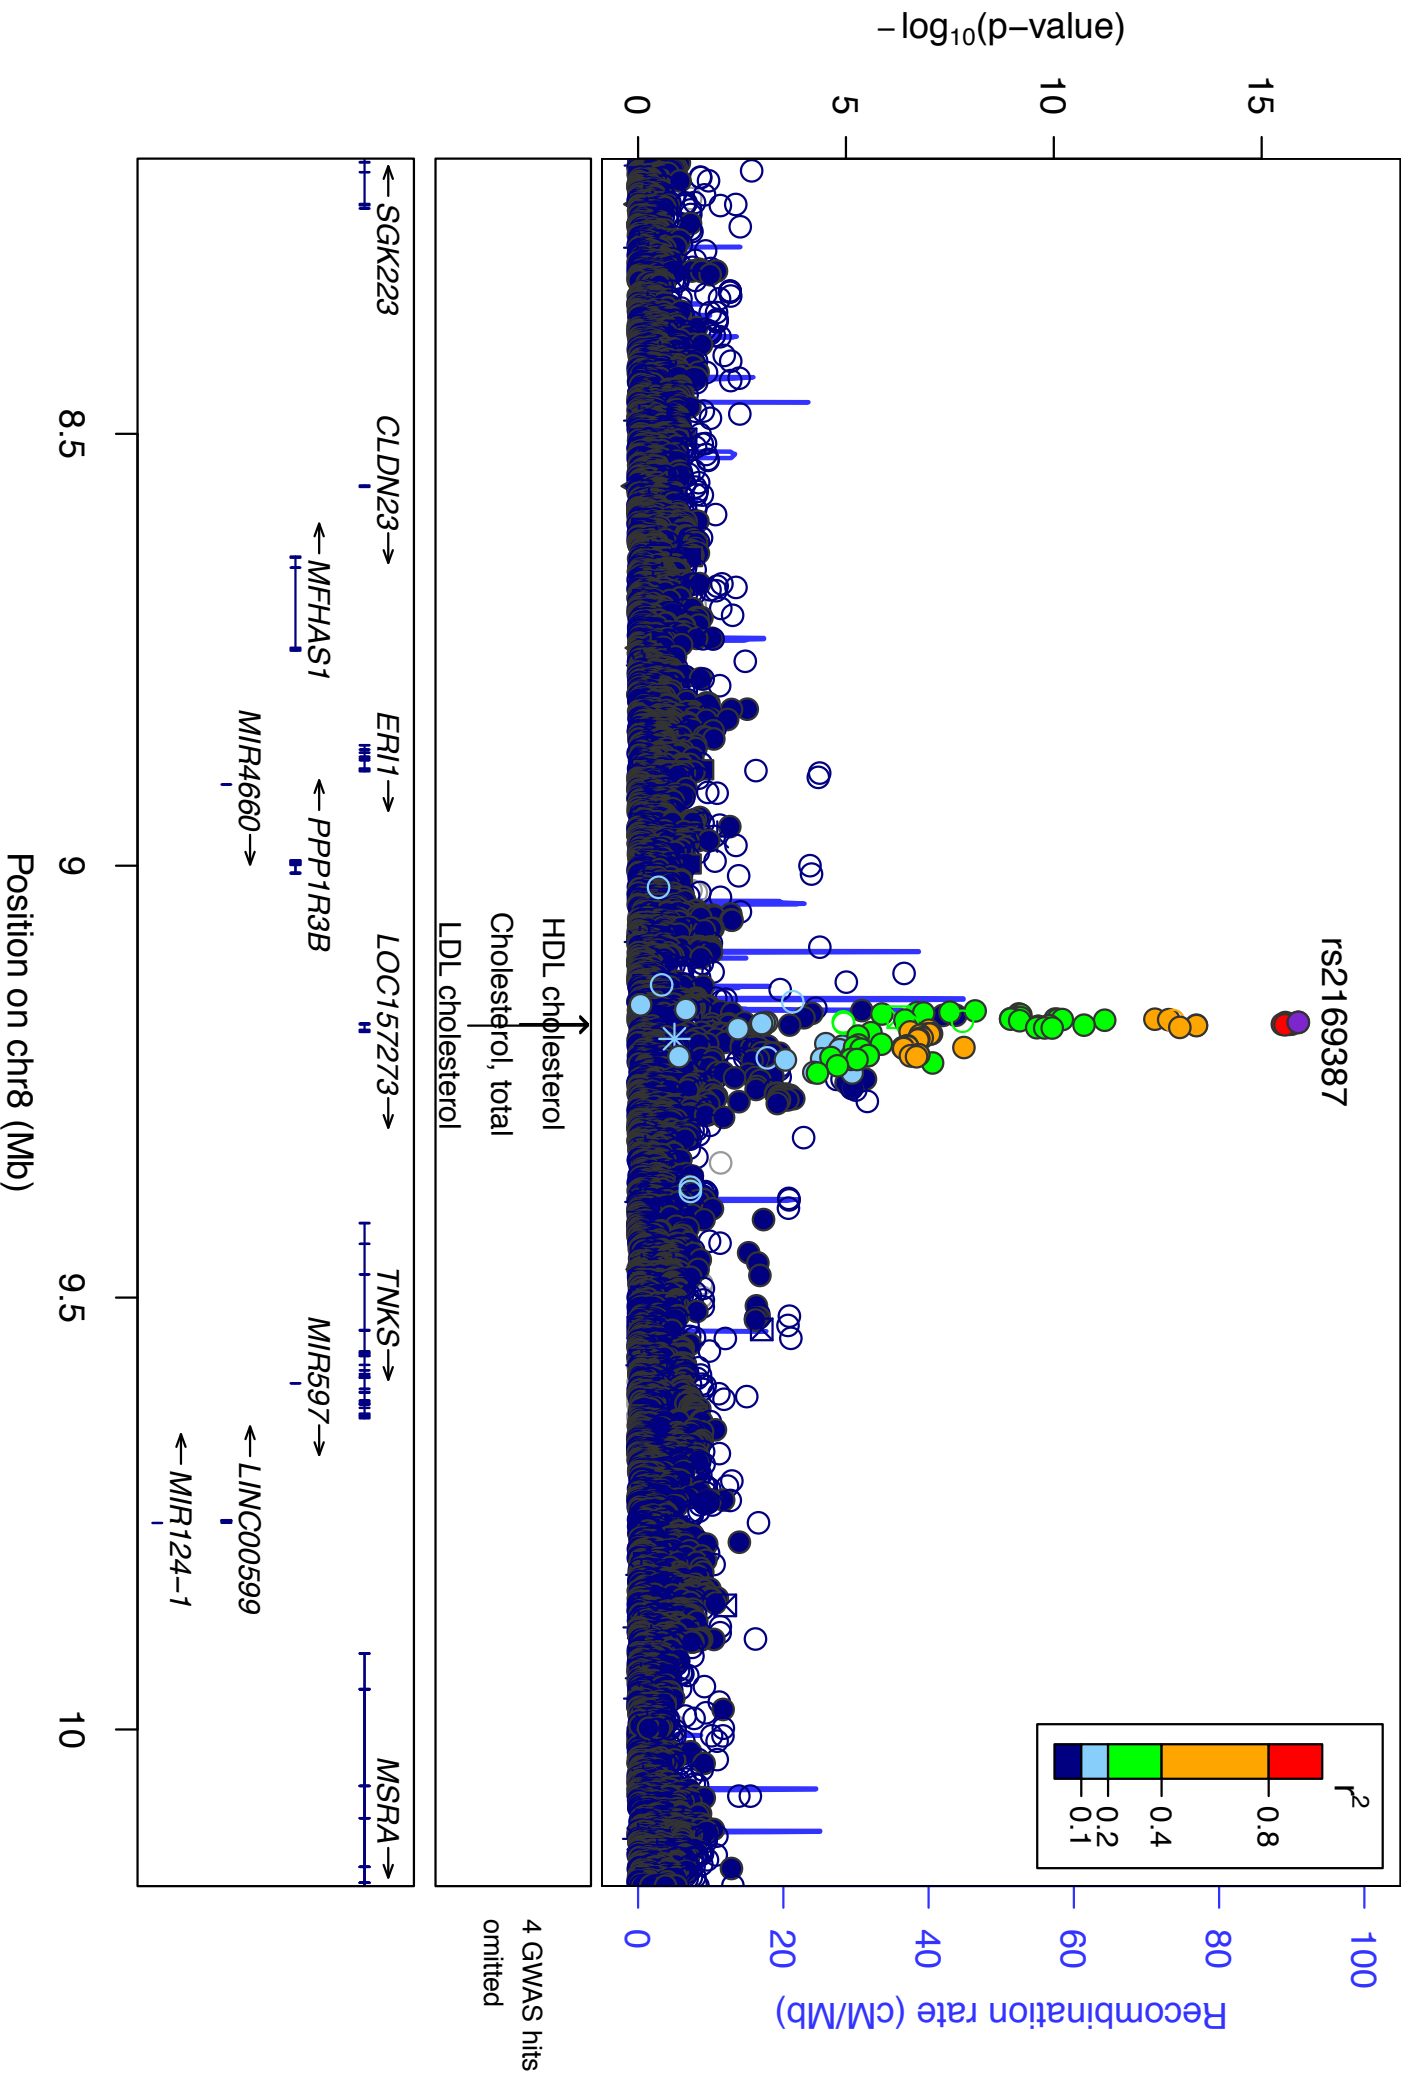

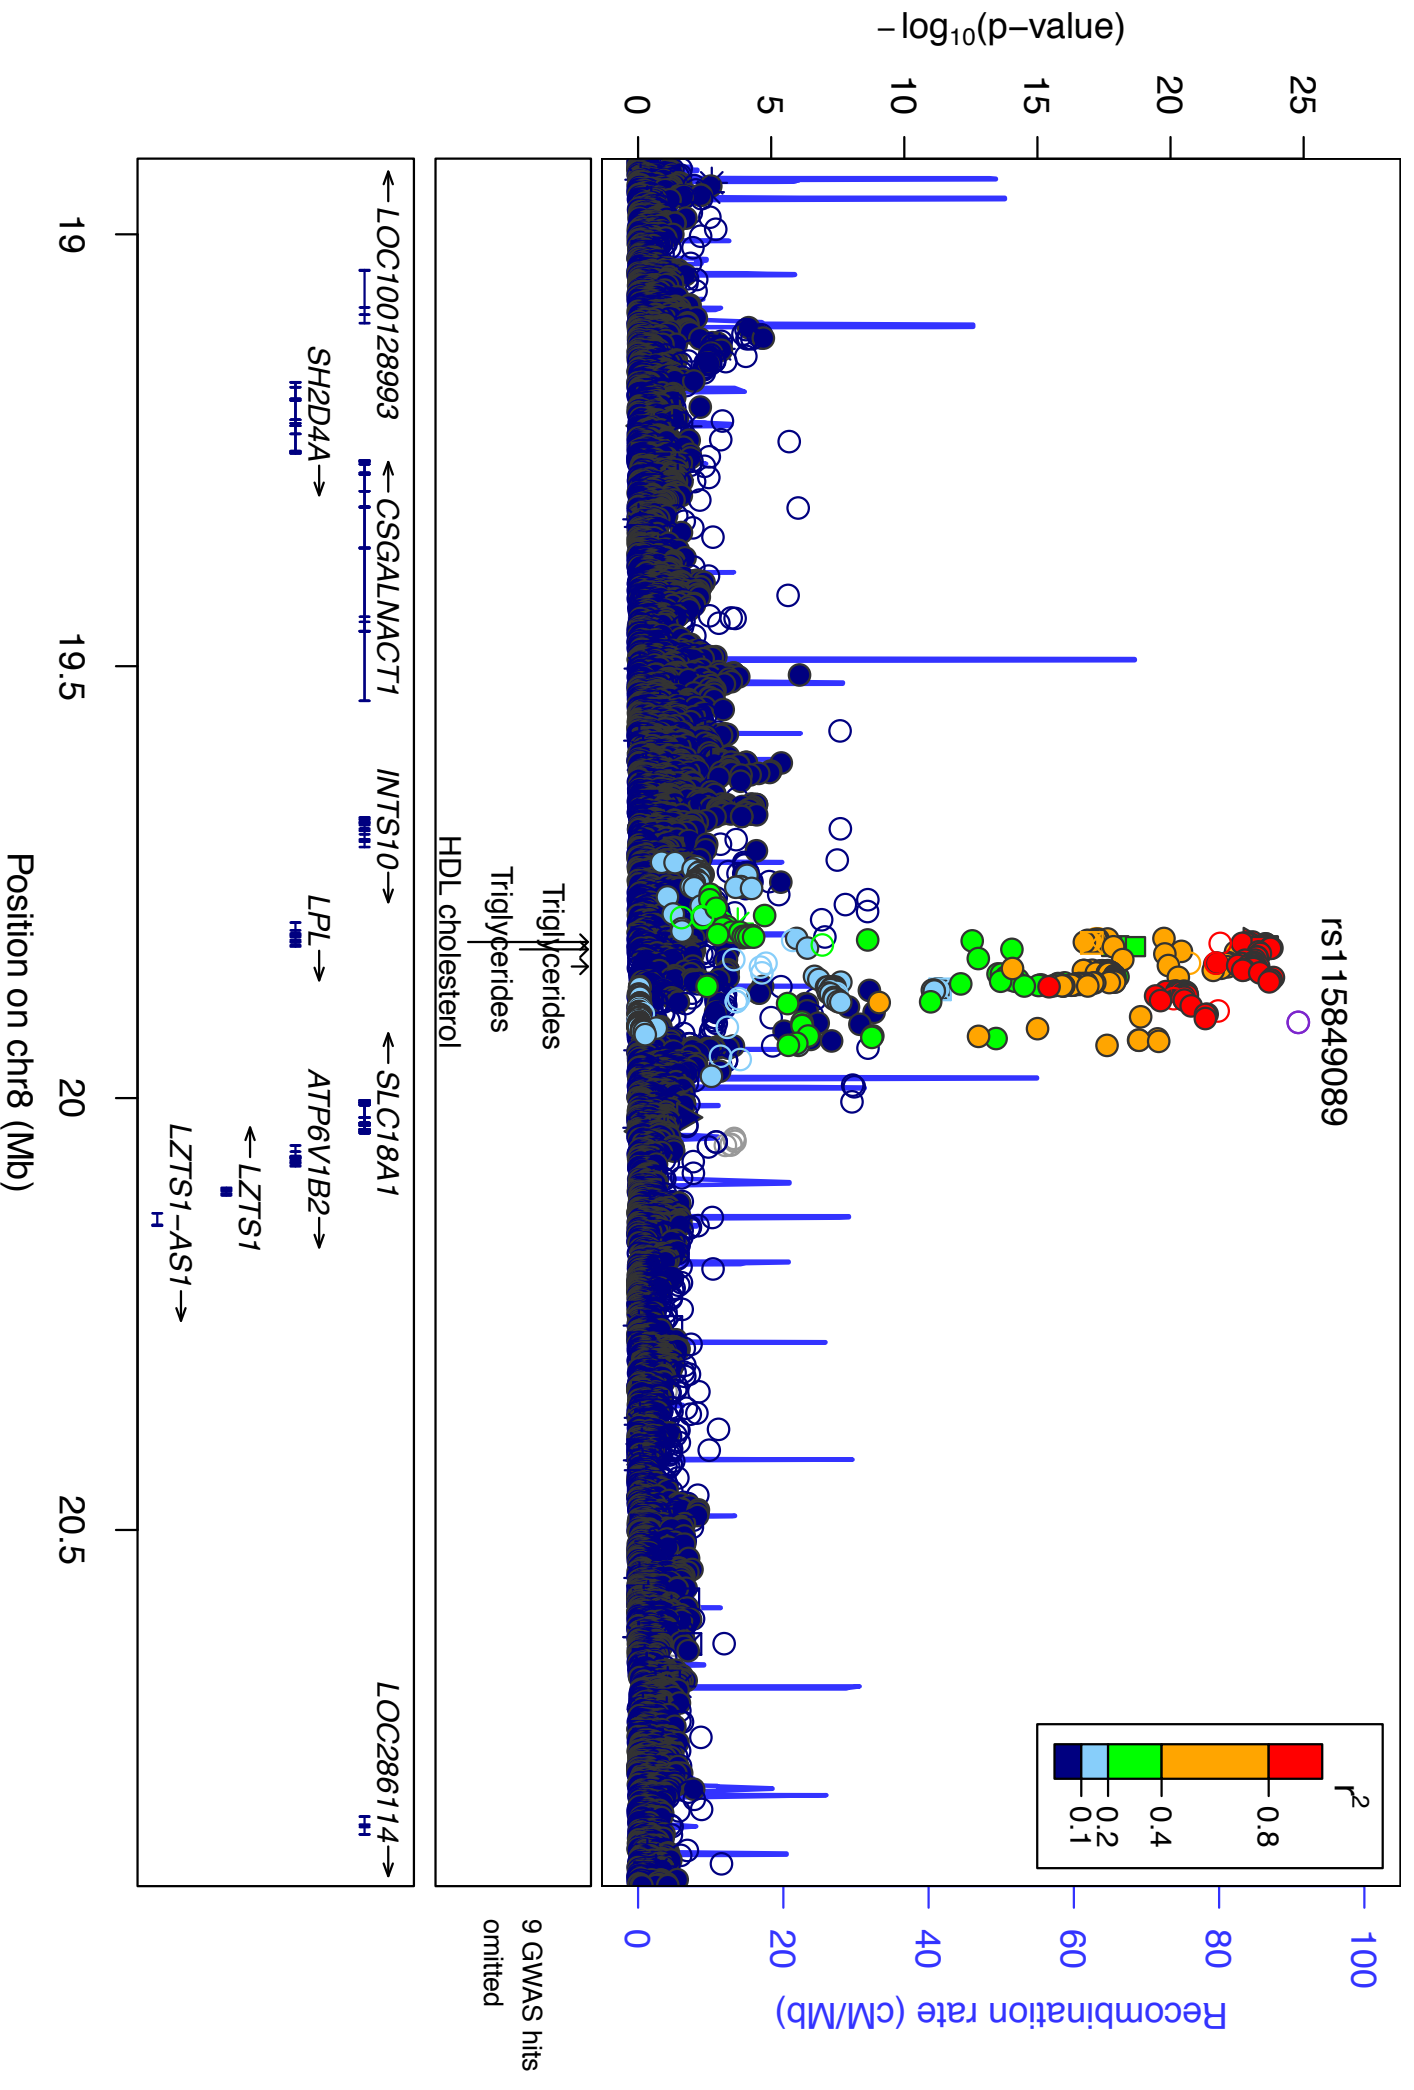

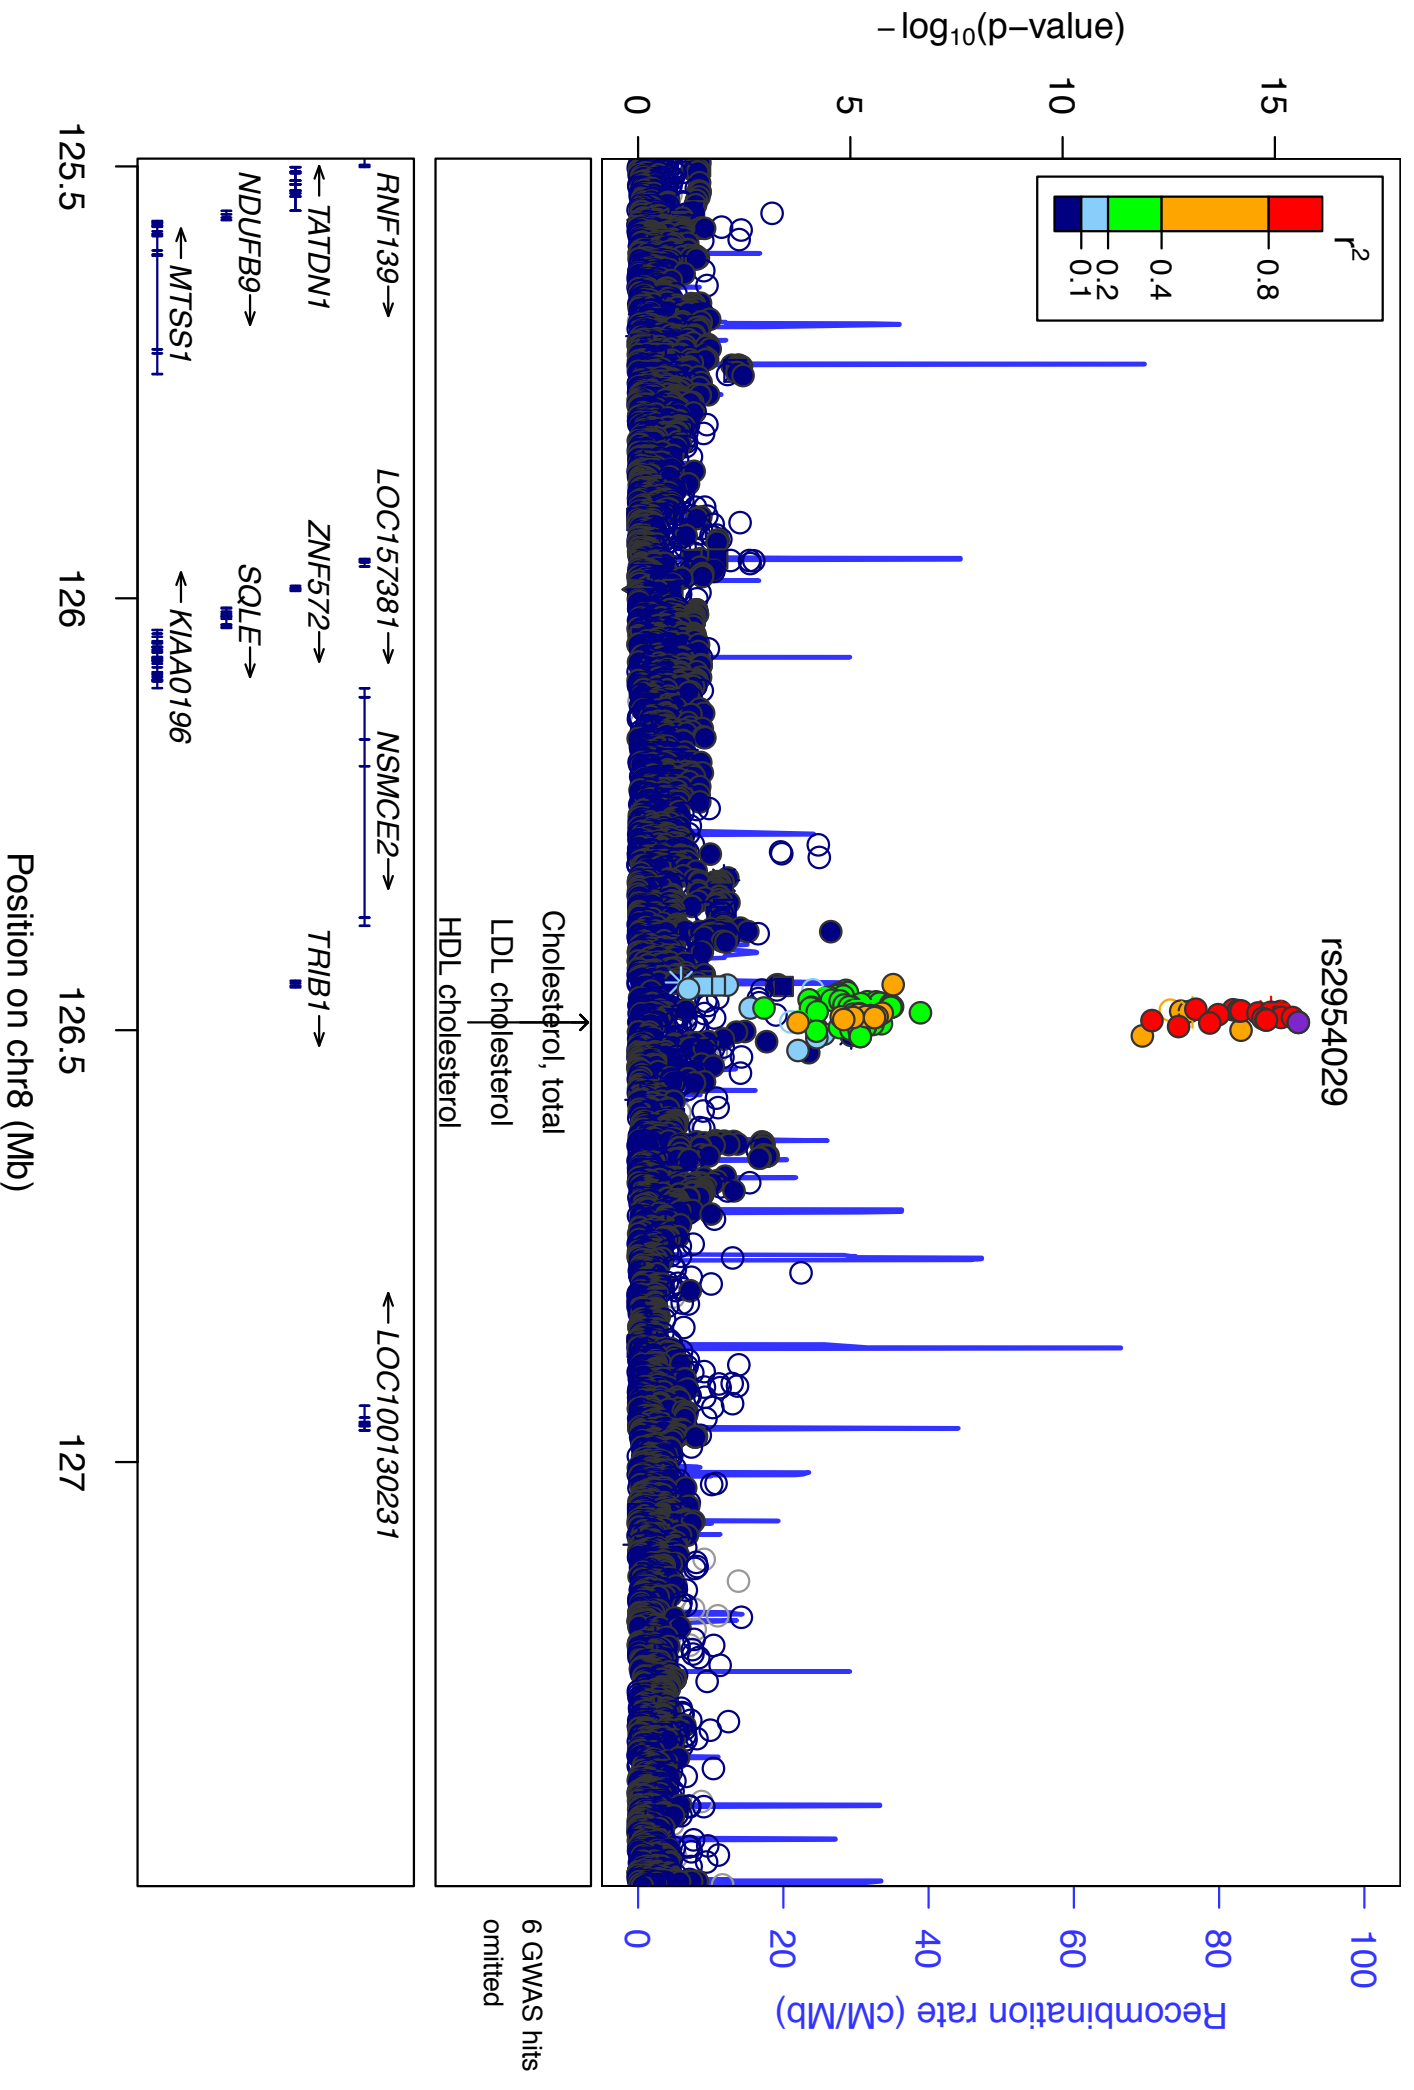

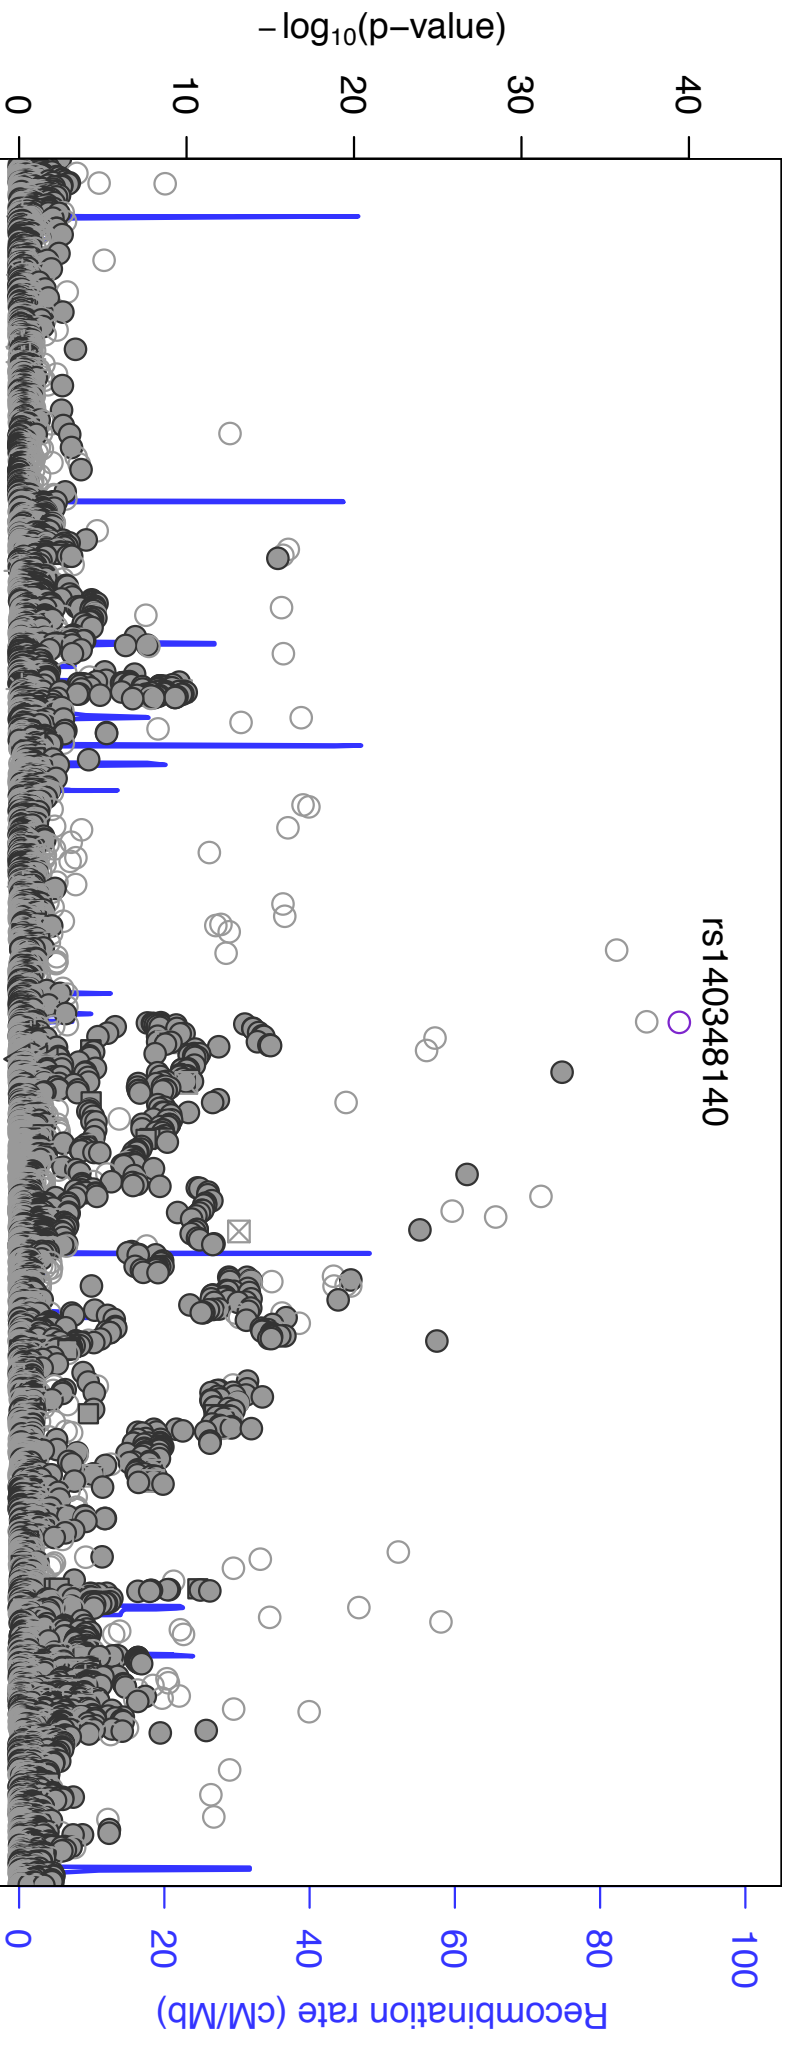

p-values for SNPs:  
 rs140348140:  $1.8 \times 10^{-9}$   
 rs1173771:  $4 \times 10^{-9}$   
 rs120139:  $4 \times 10^{-9}$

Asthma

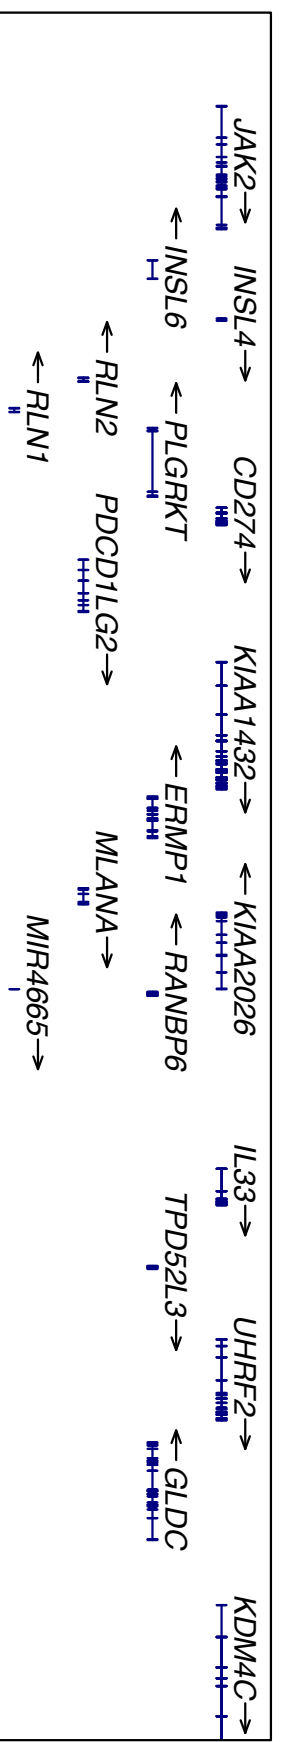

Position on chr9 (Mb)

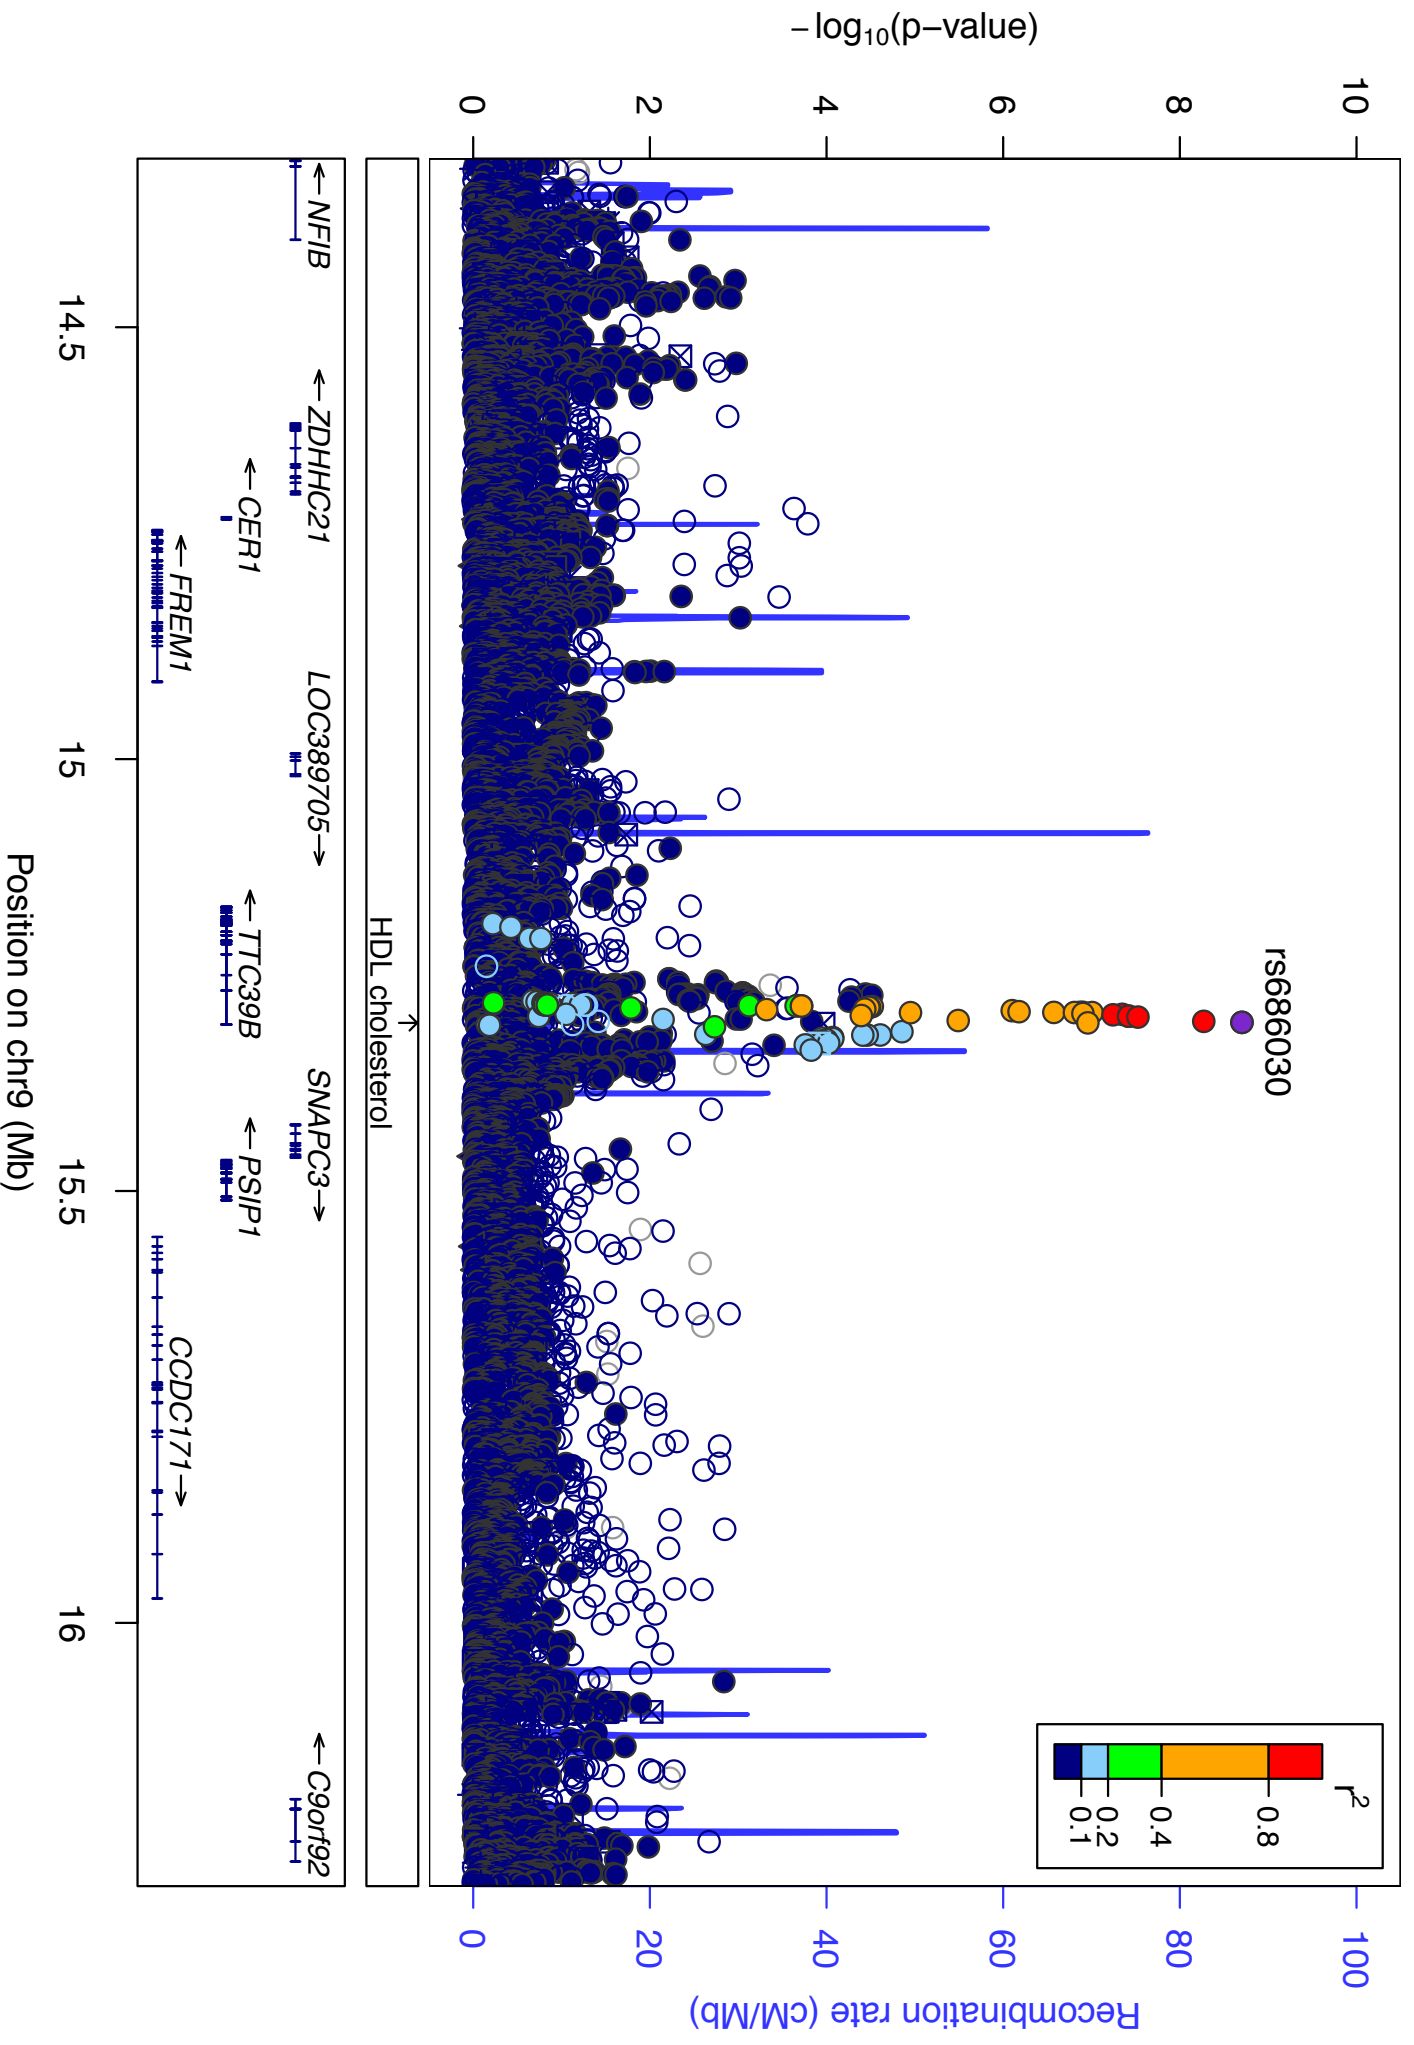

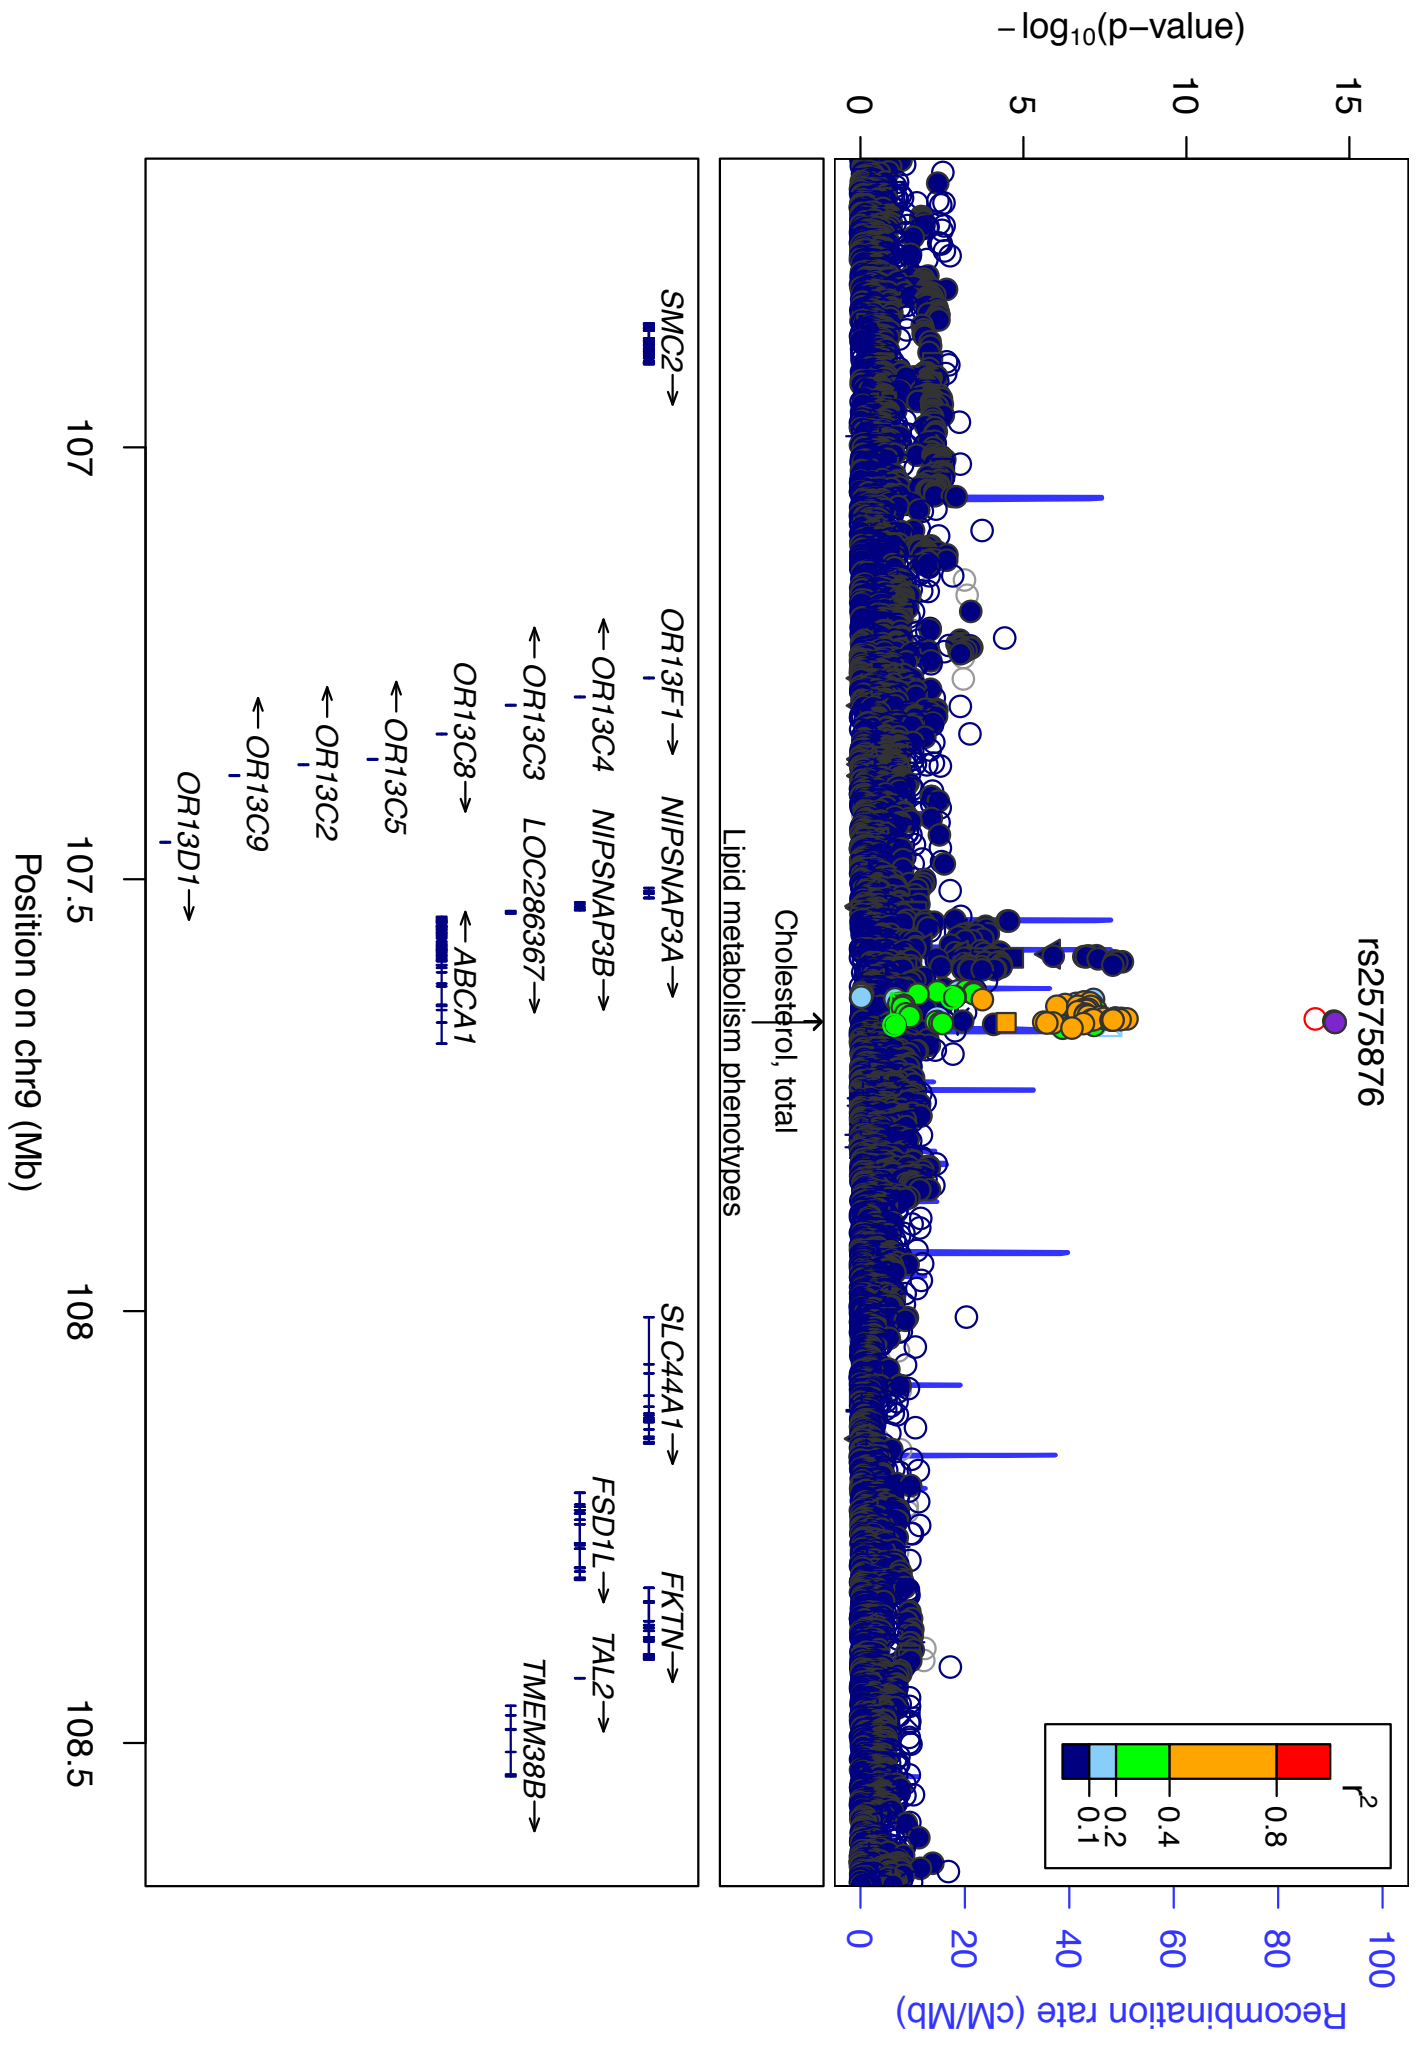





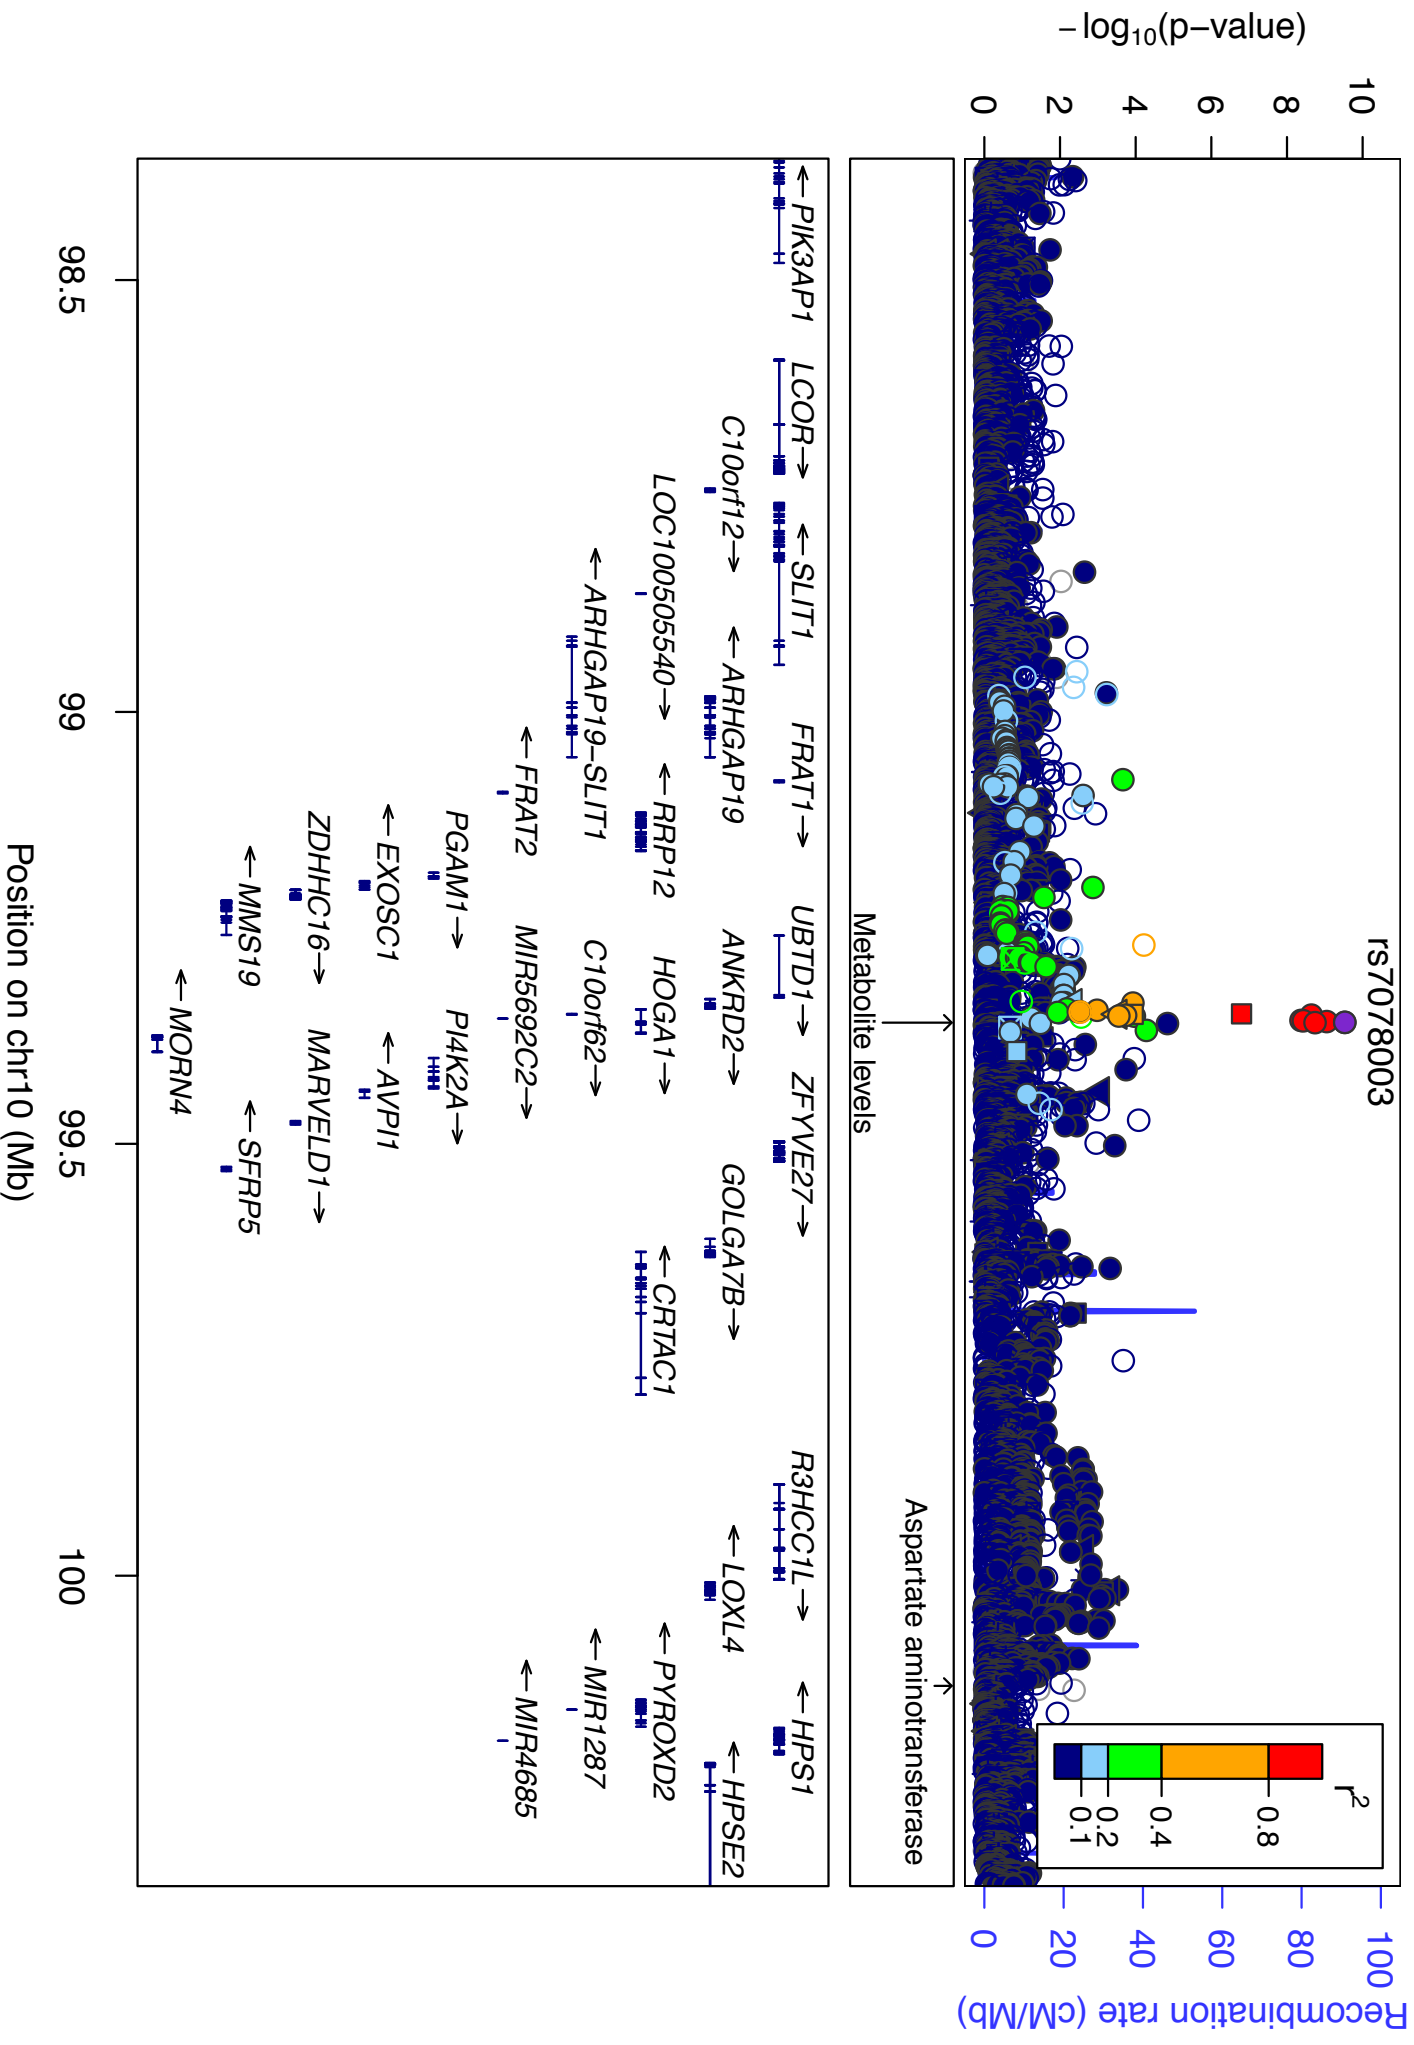



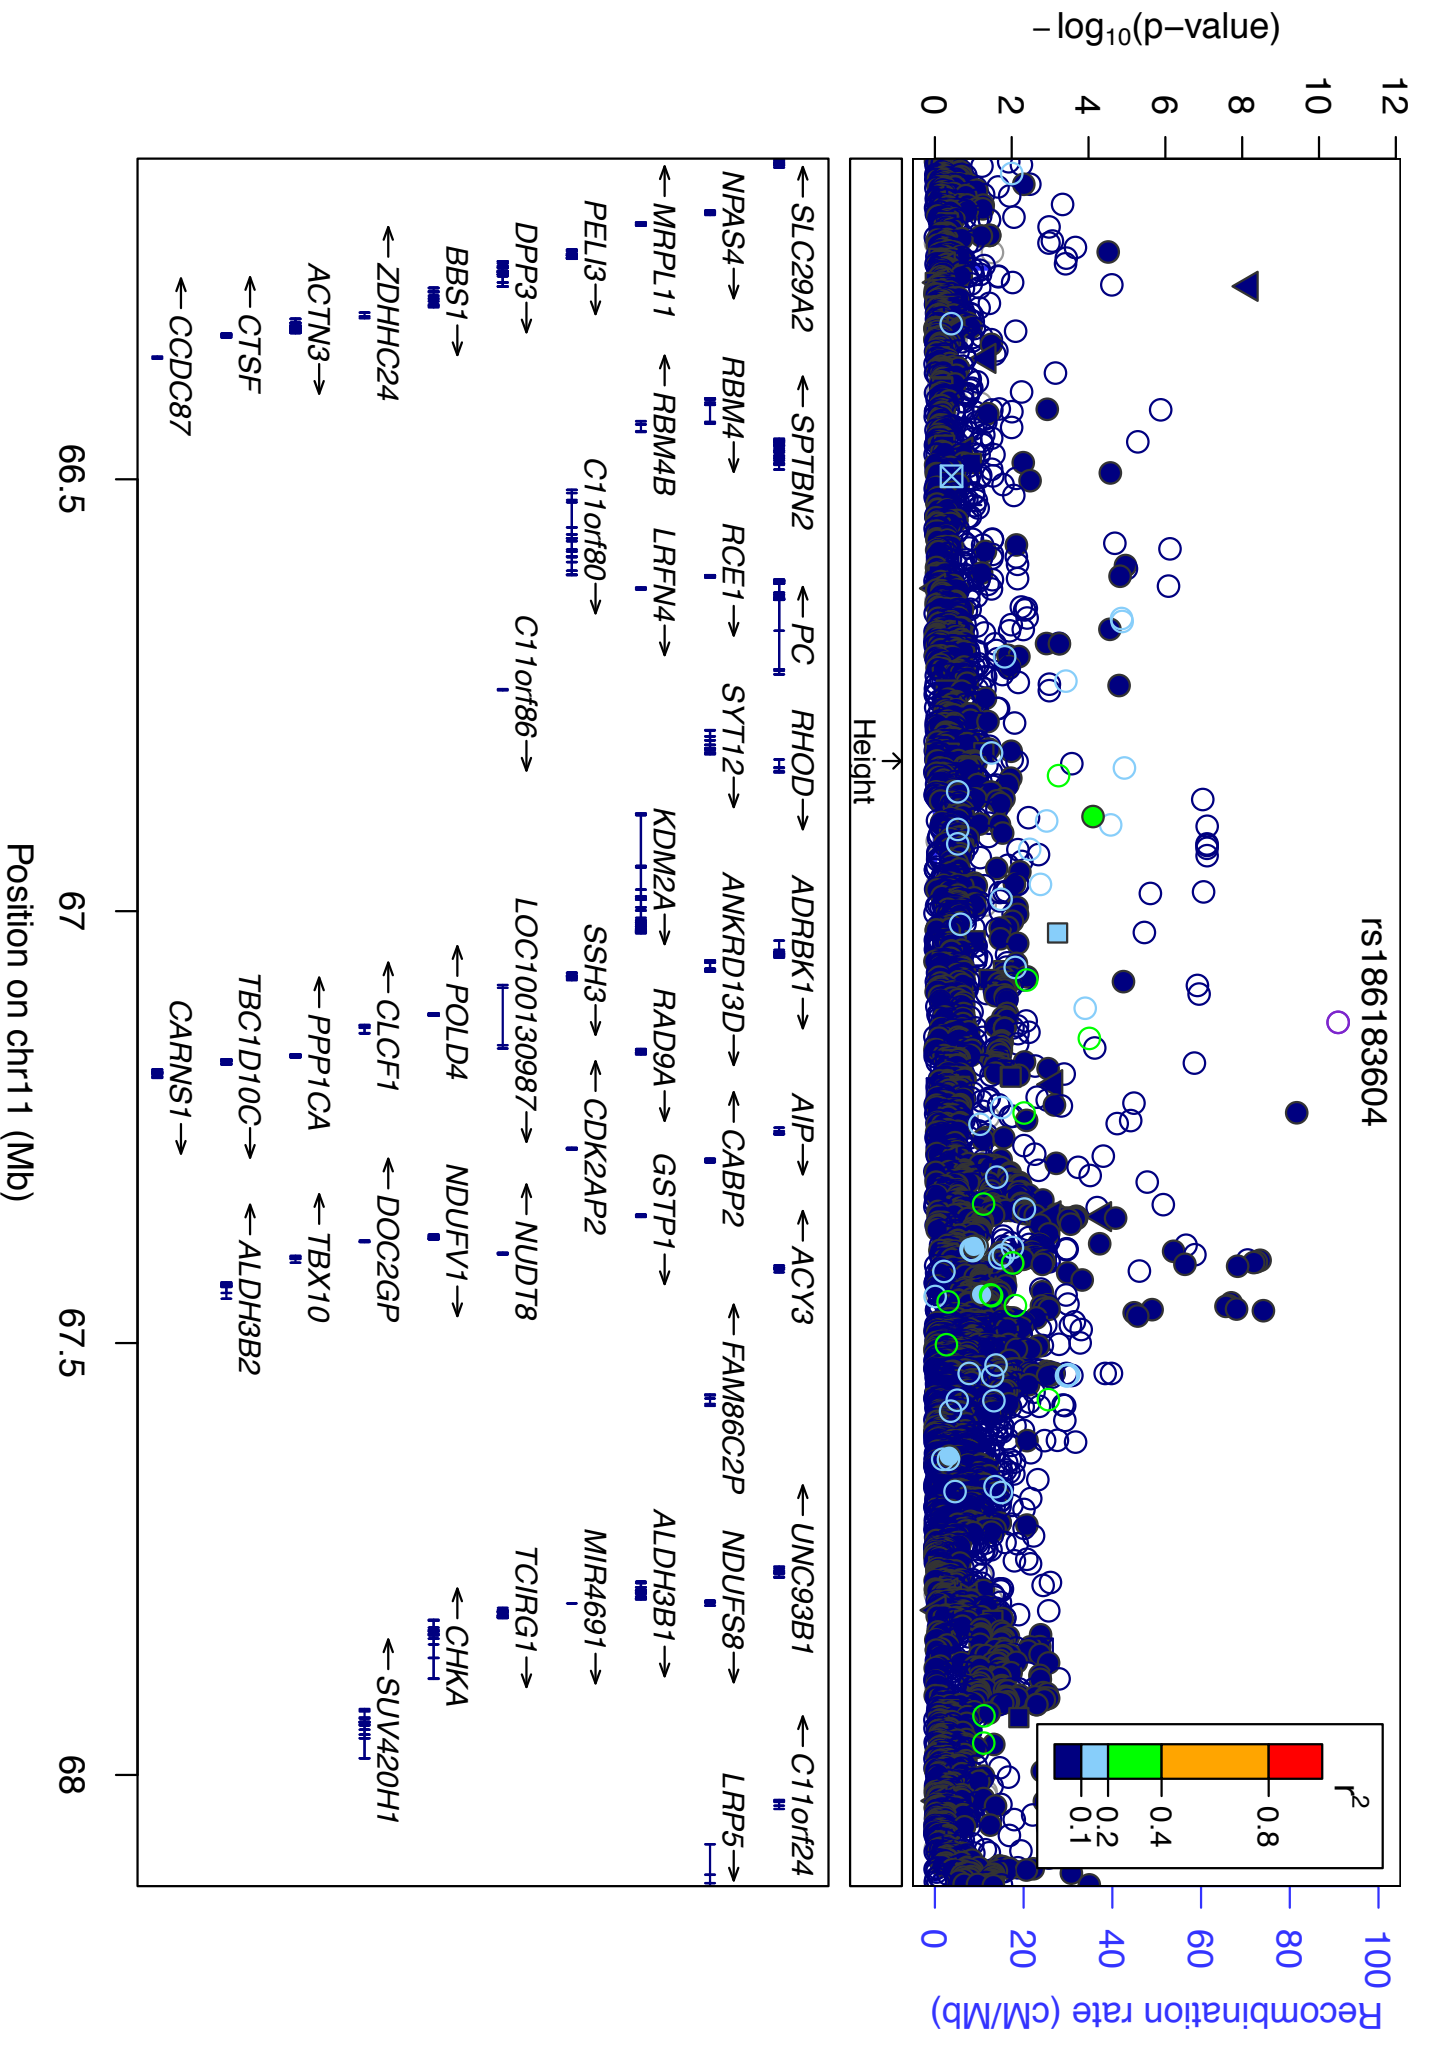

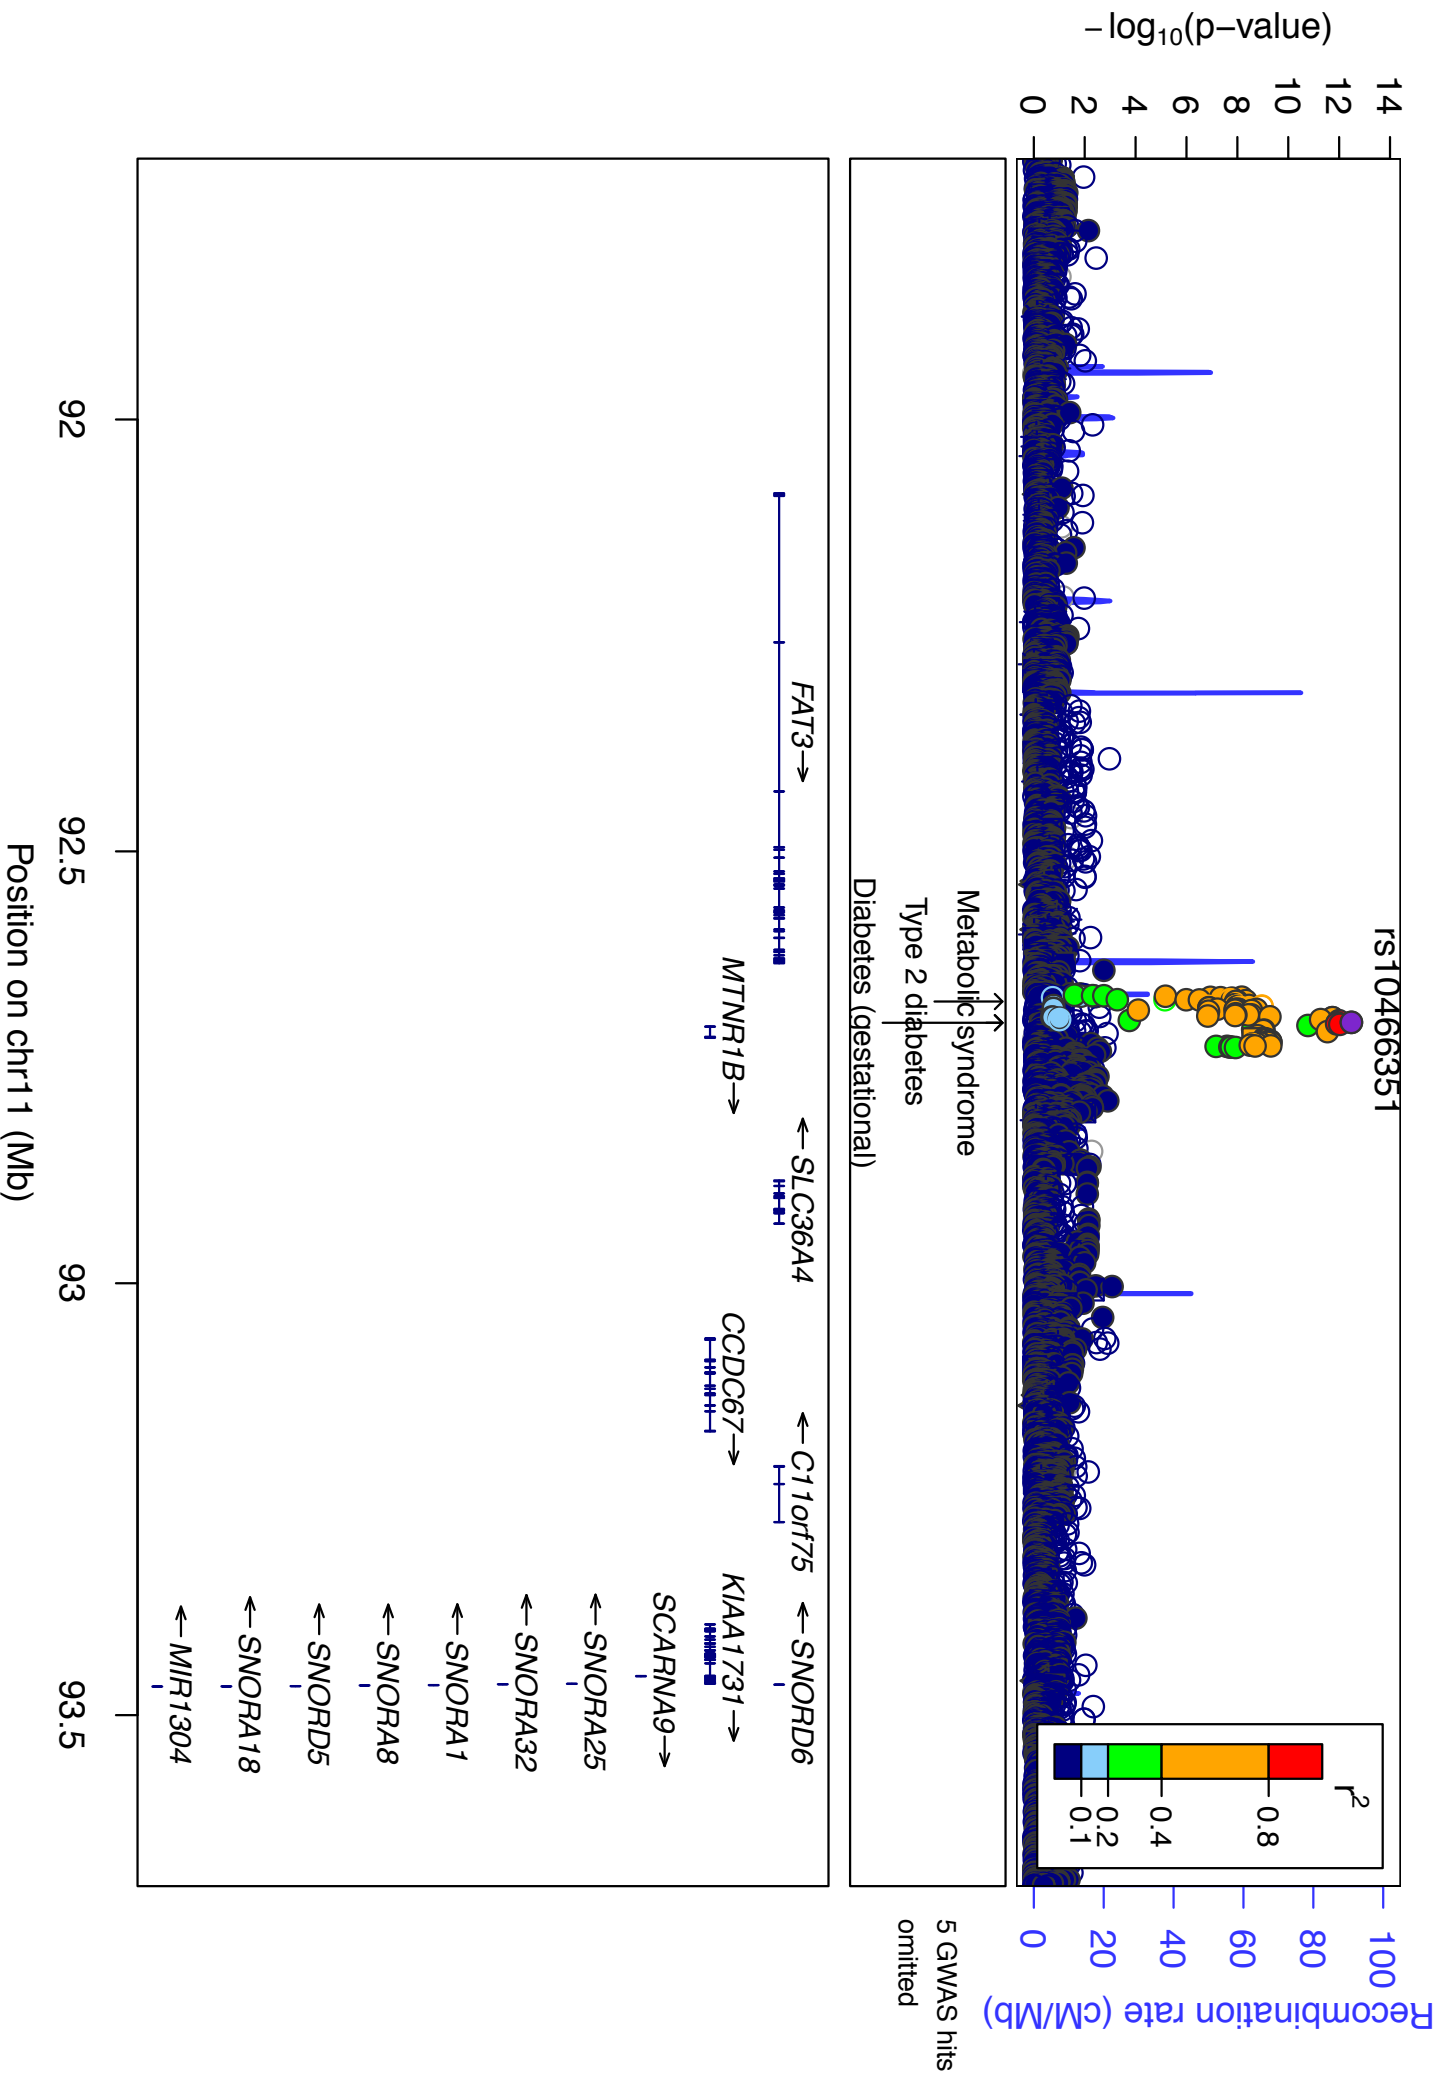

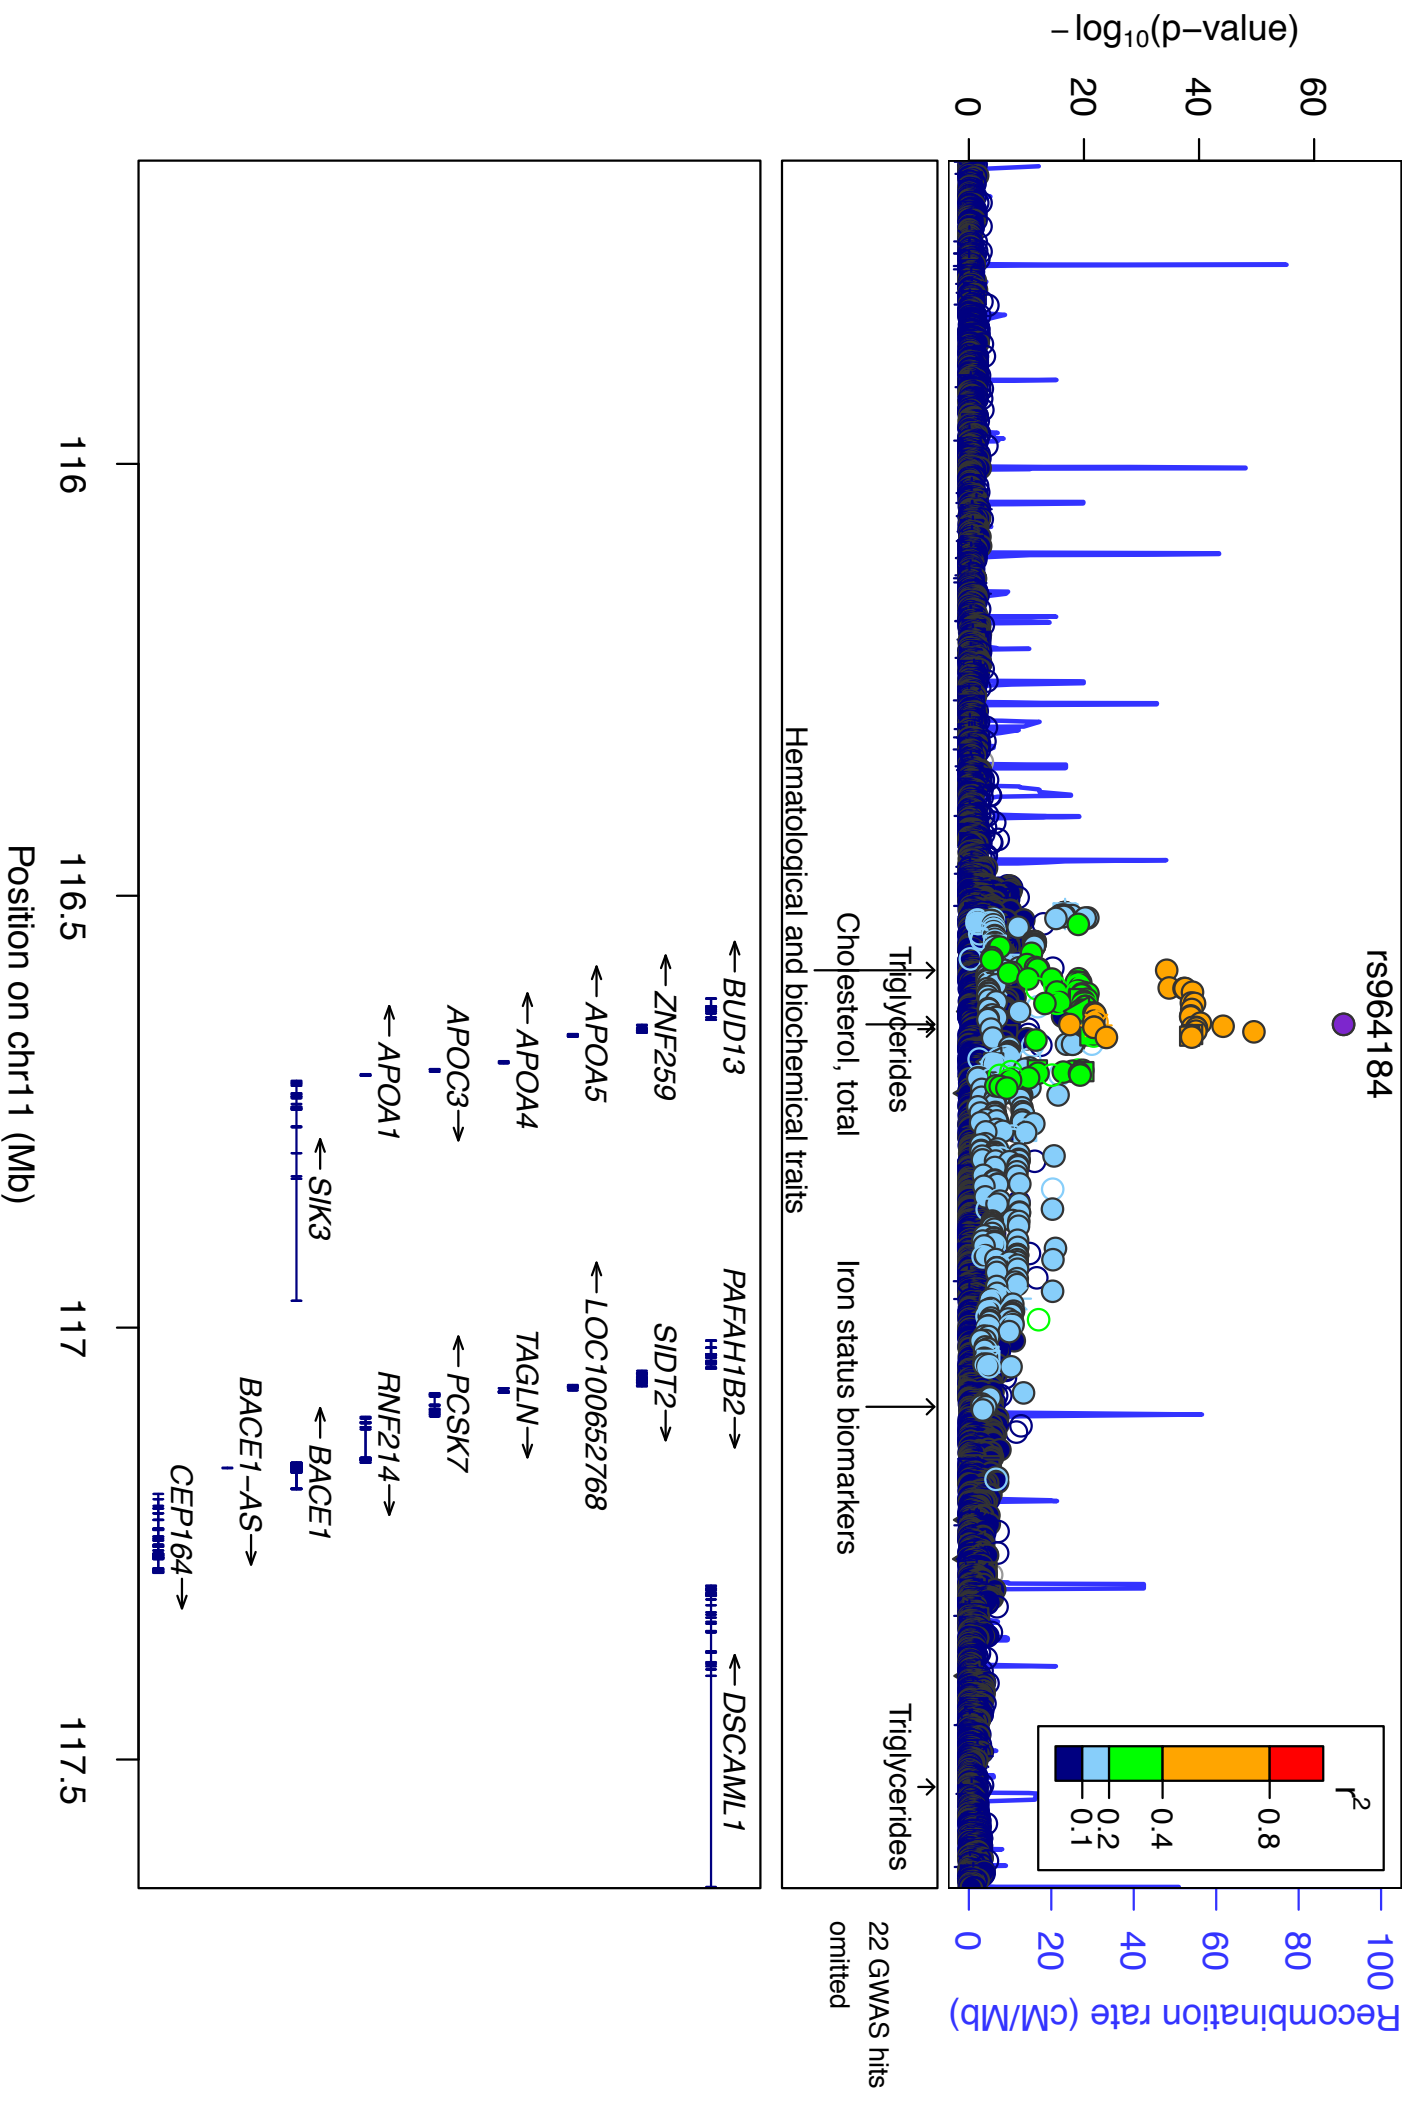

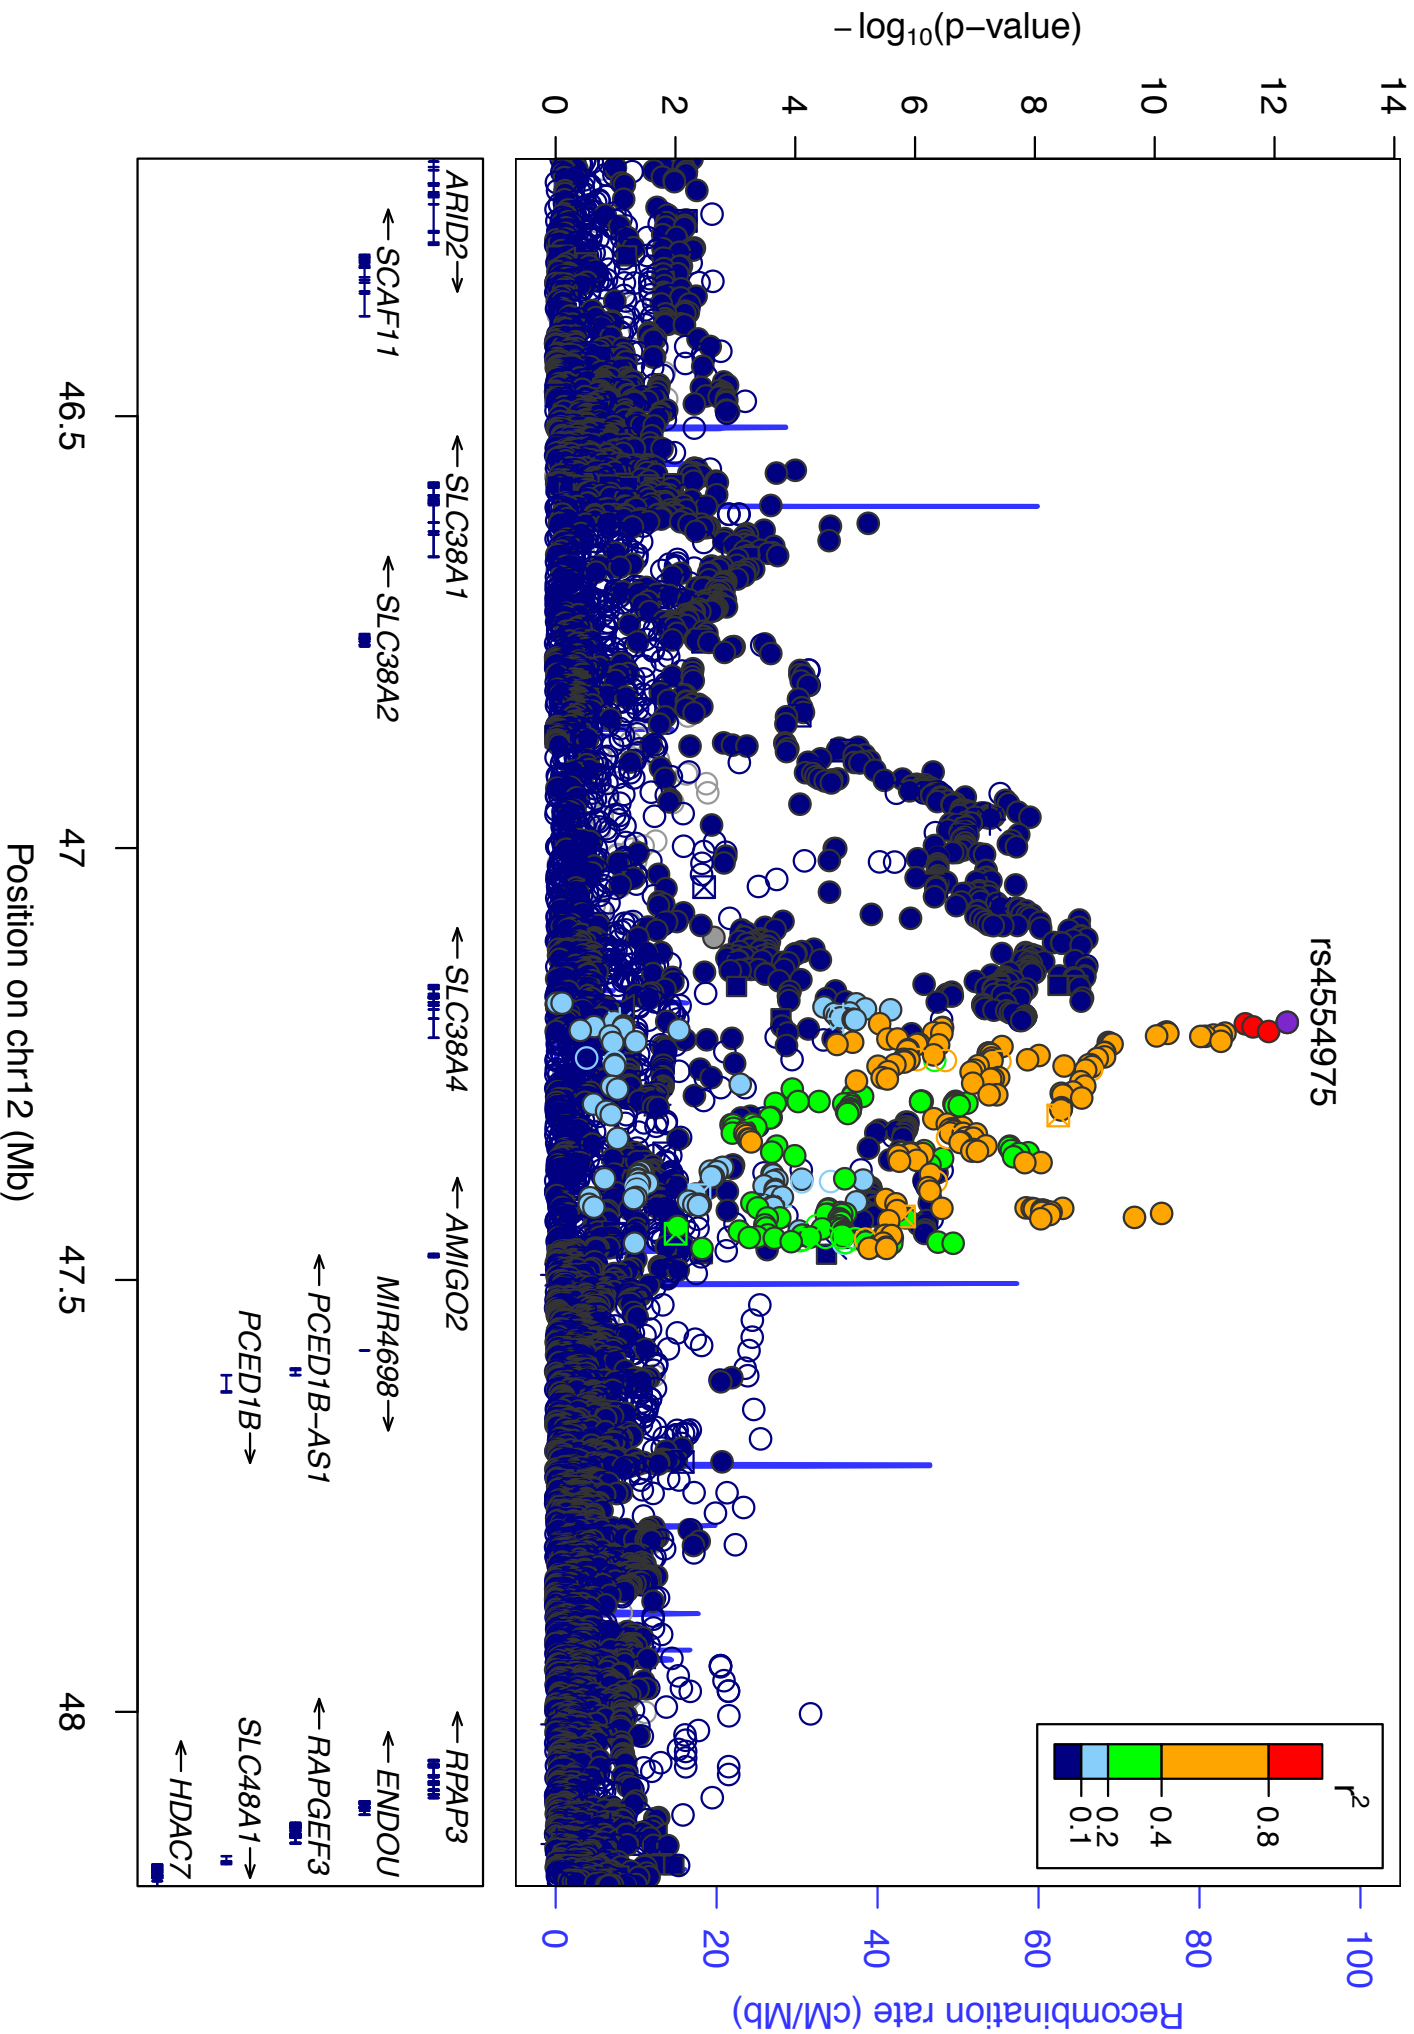

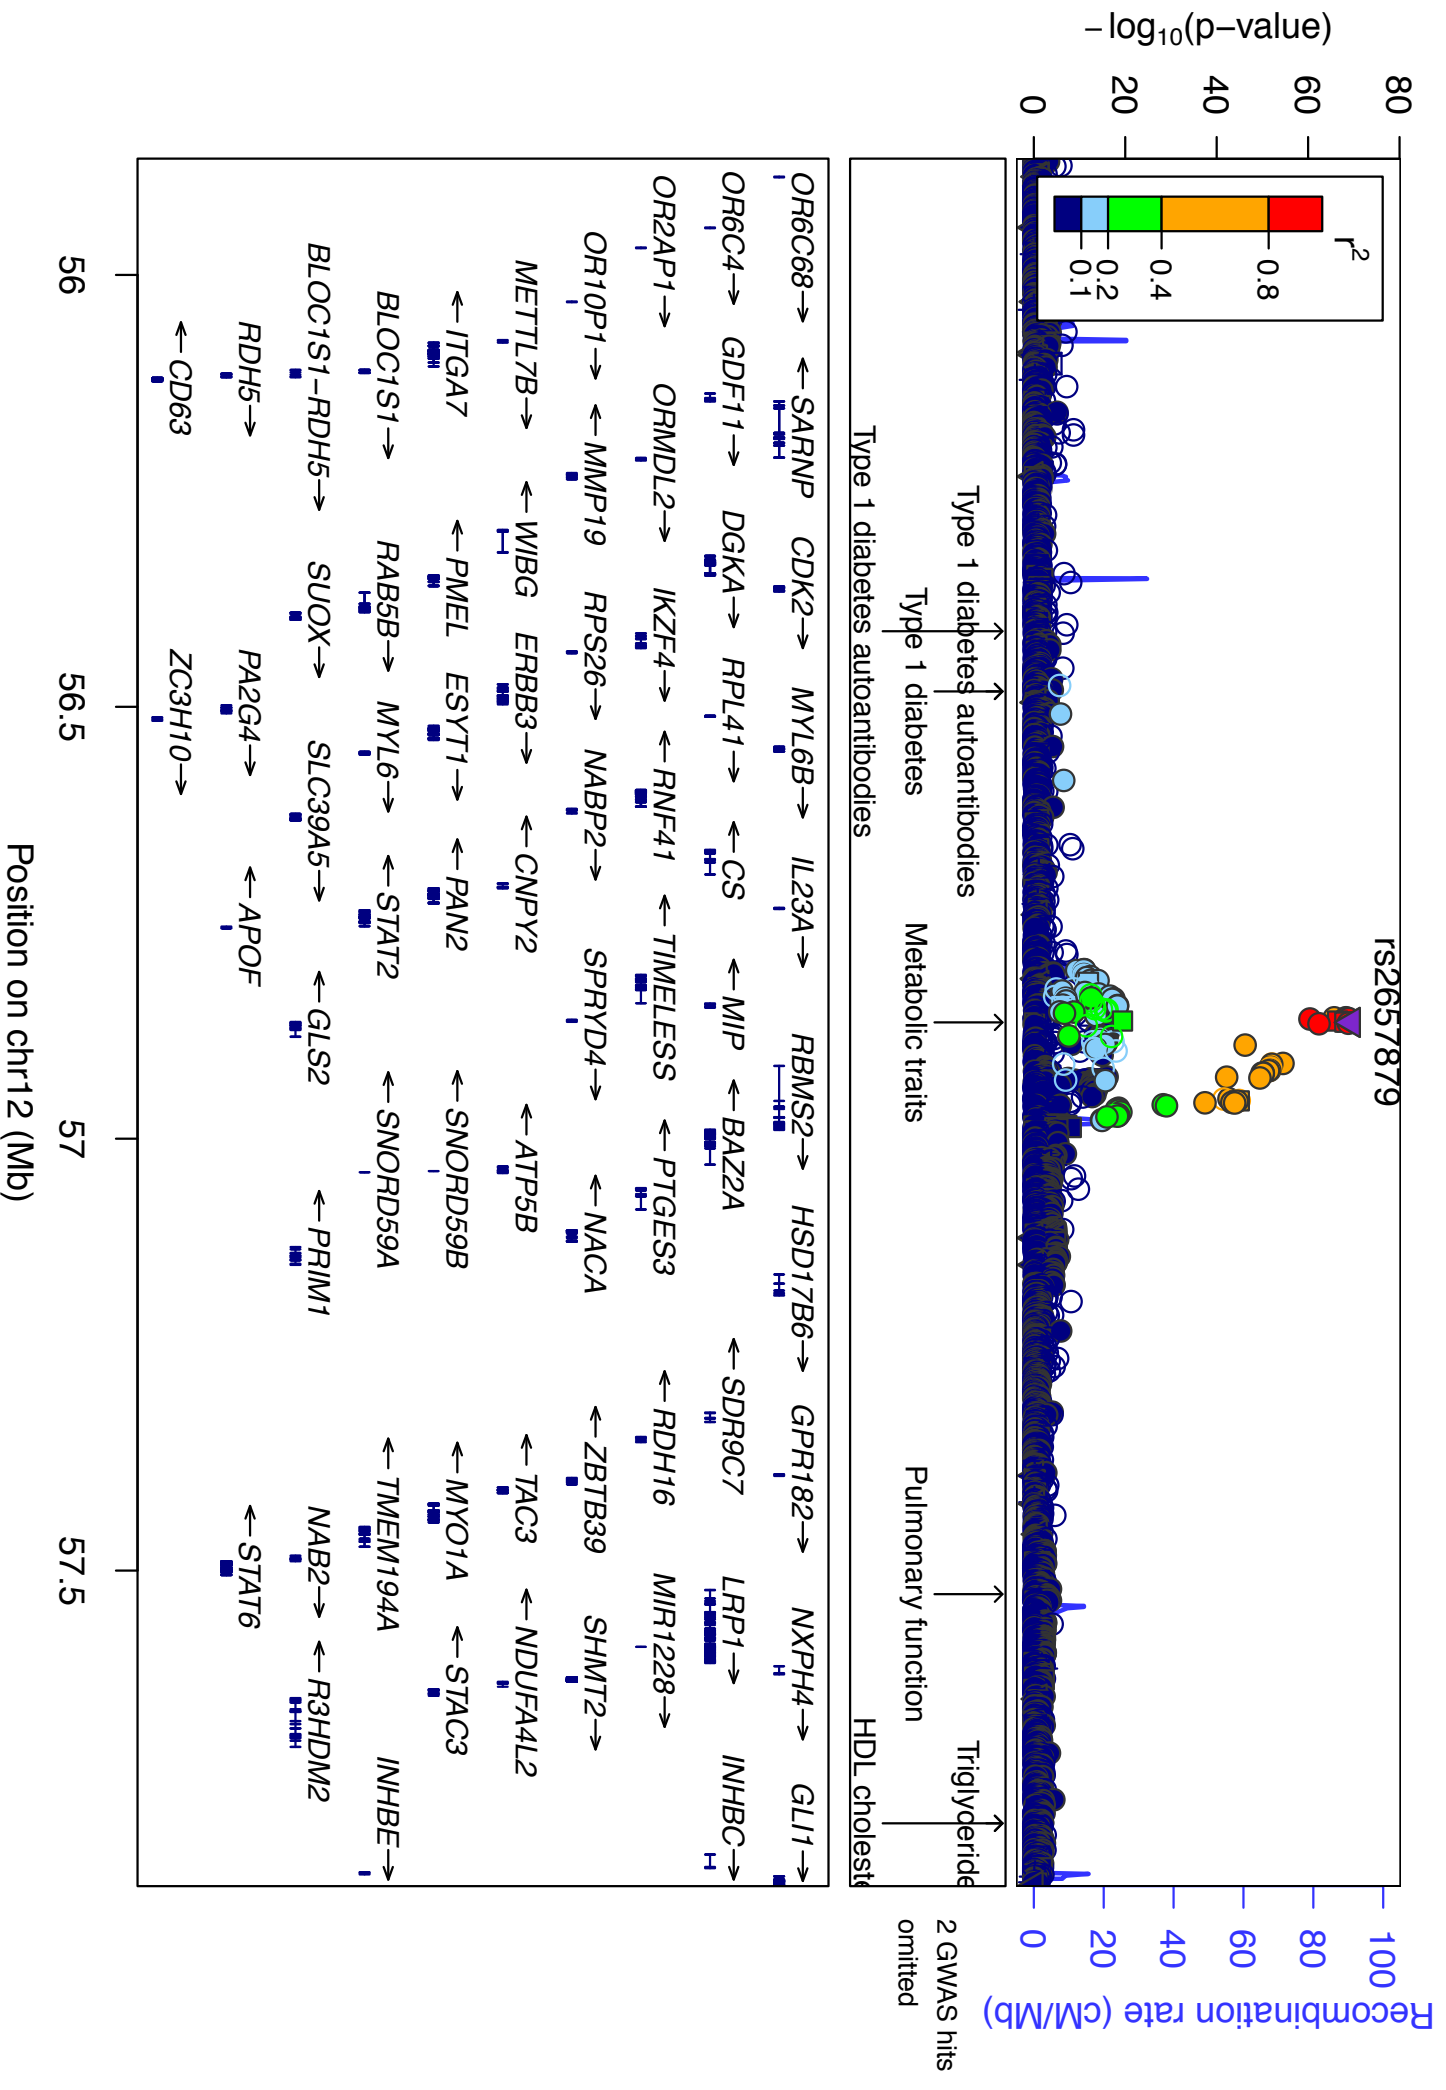



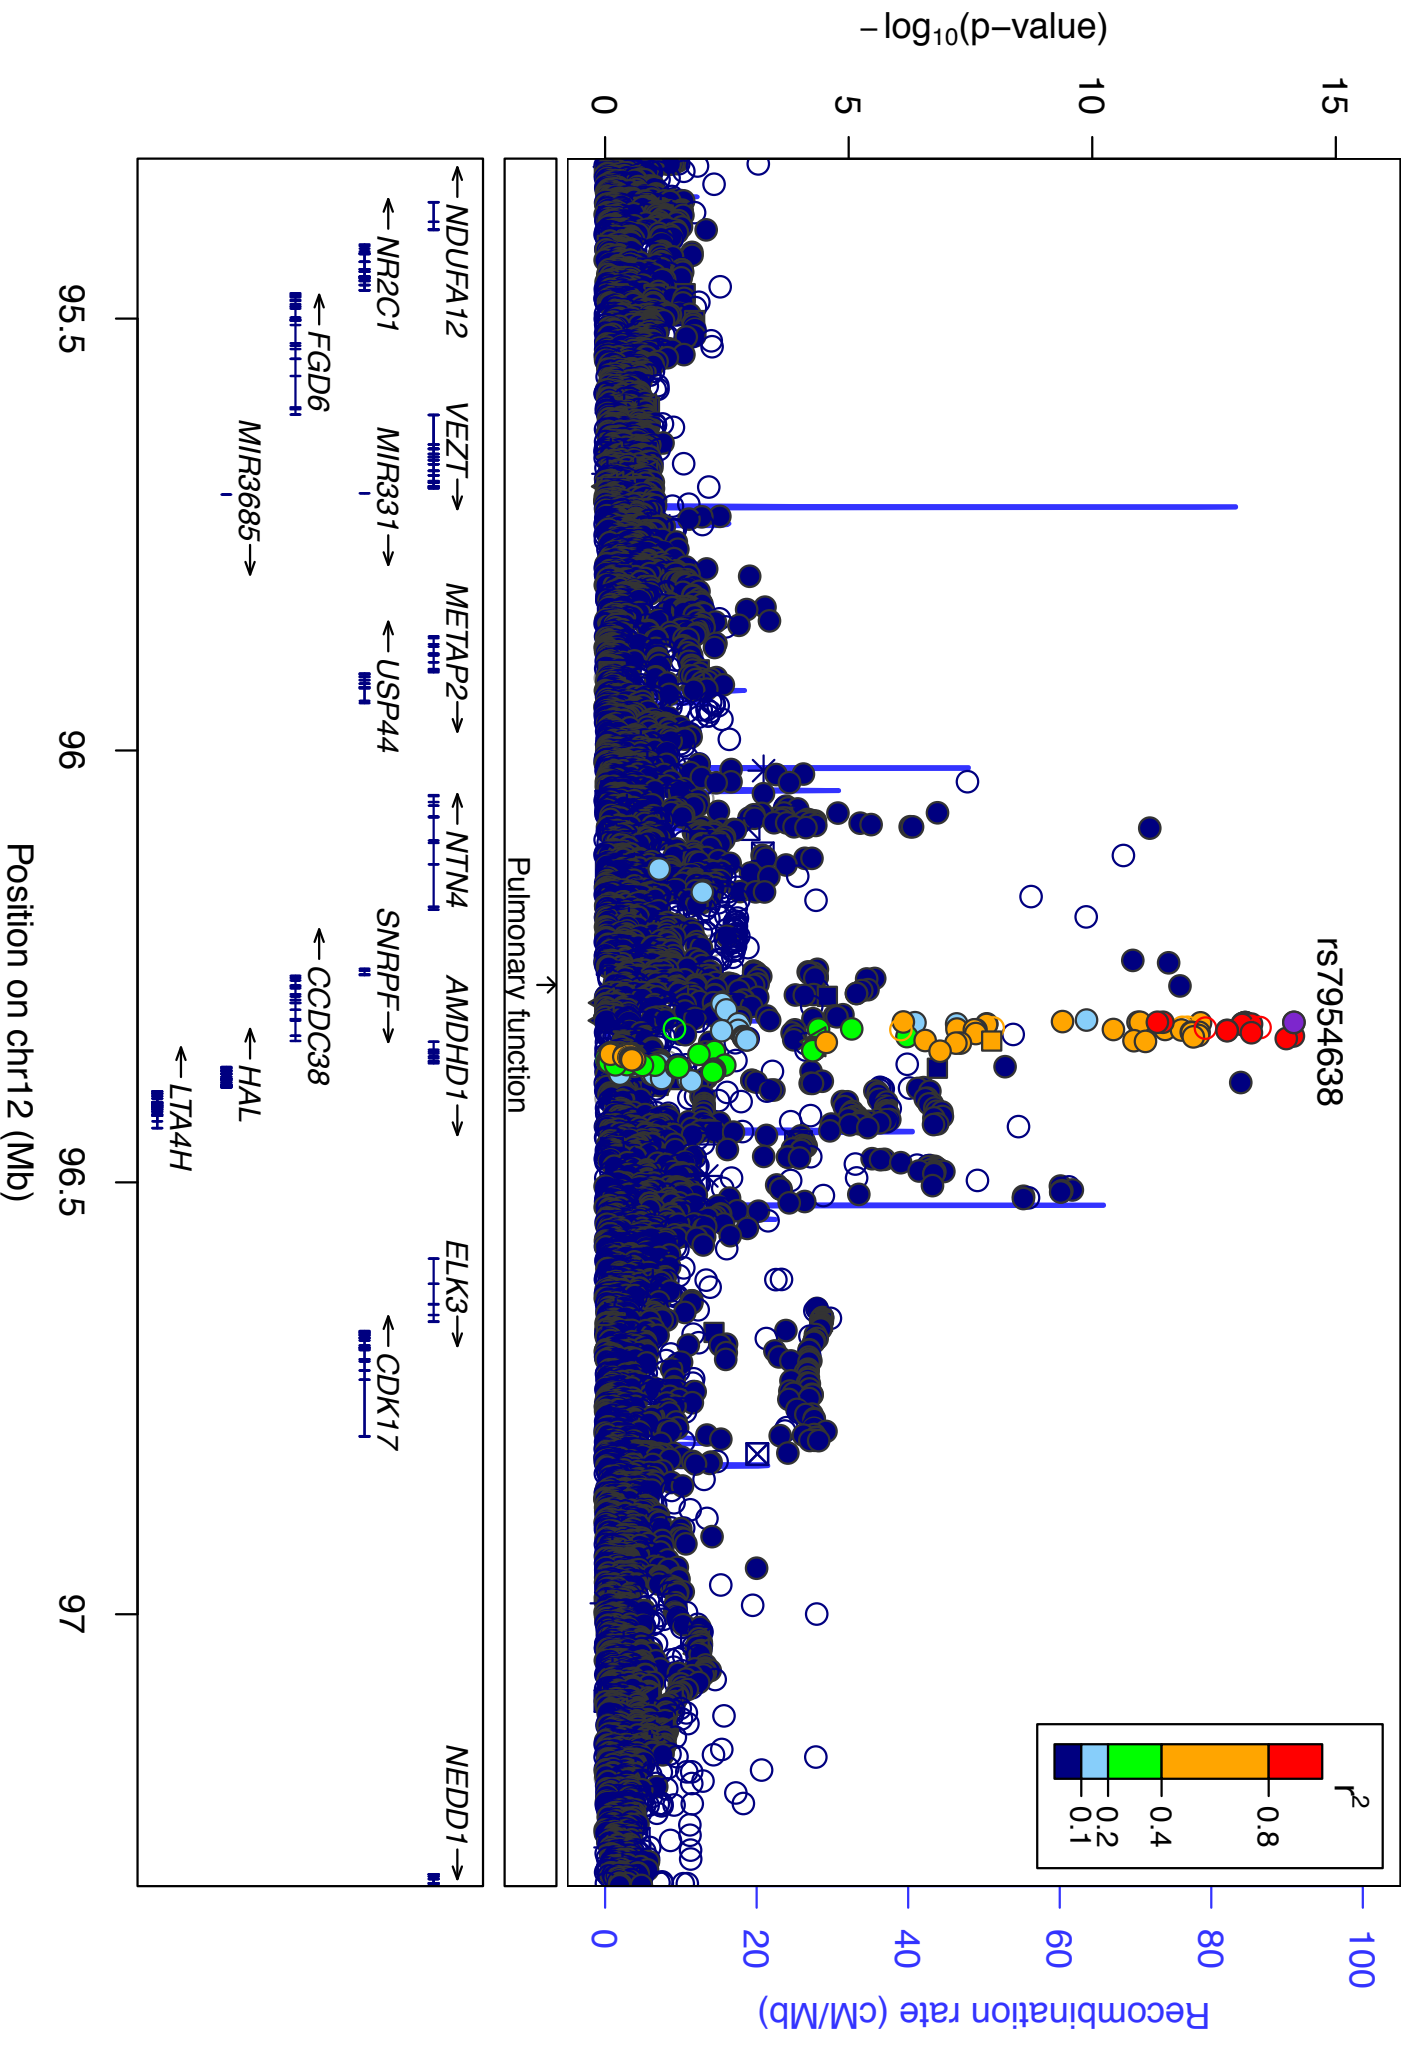

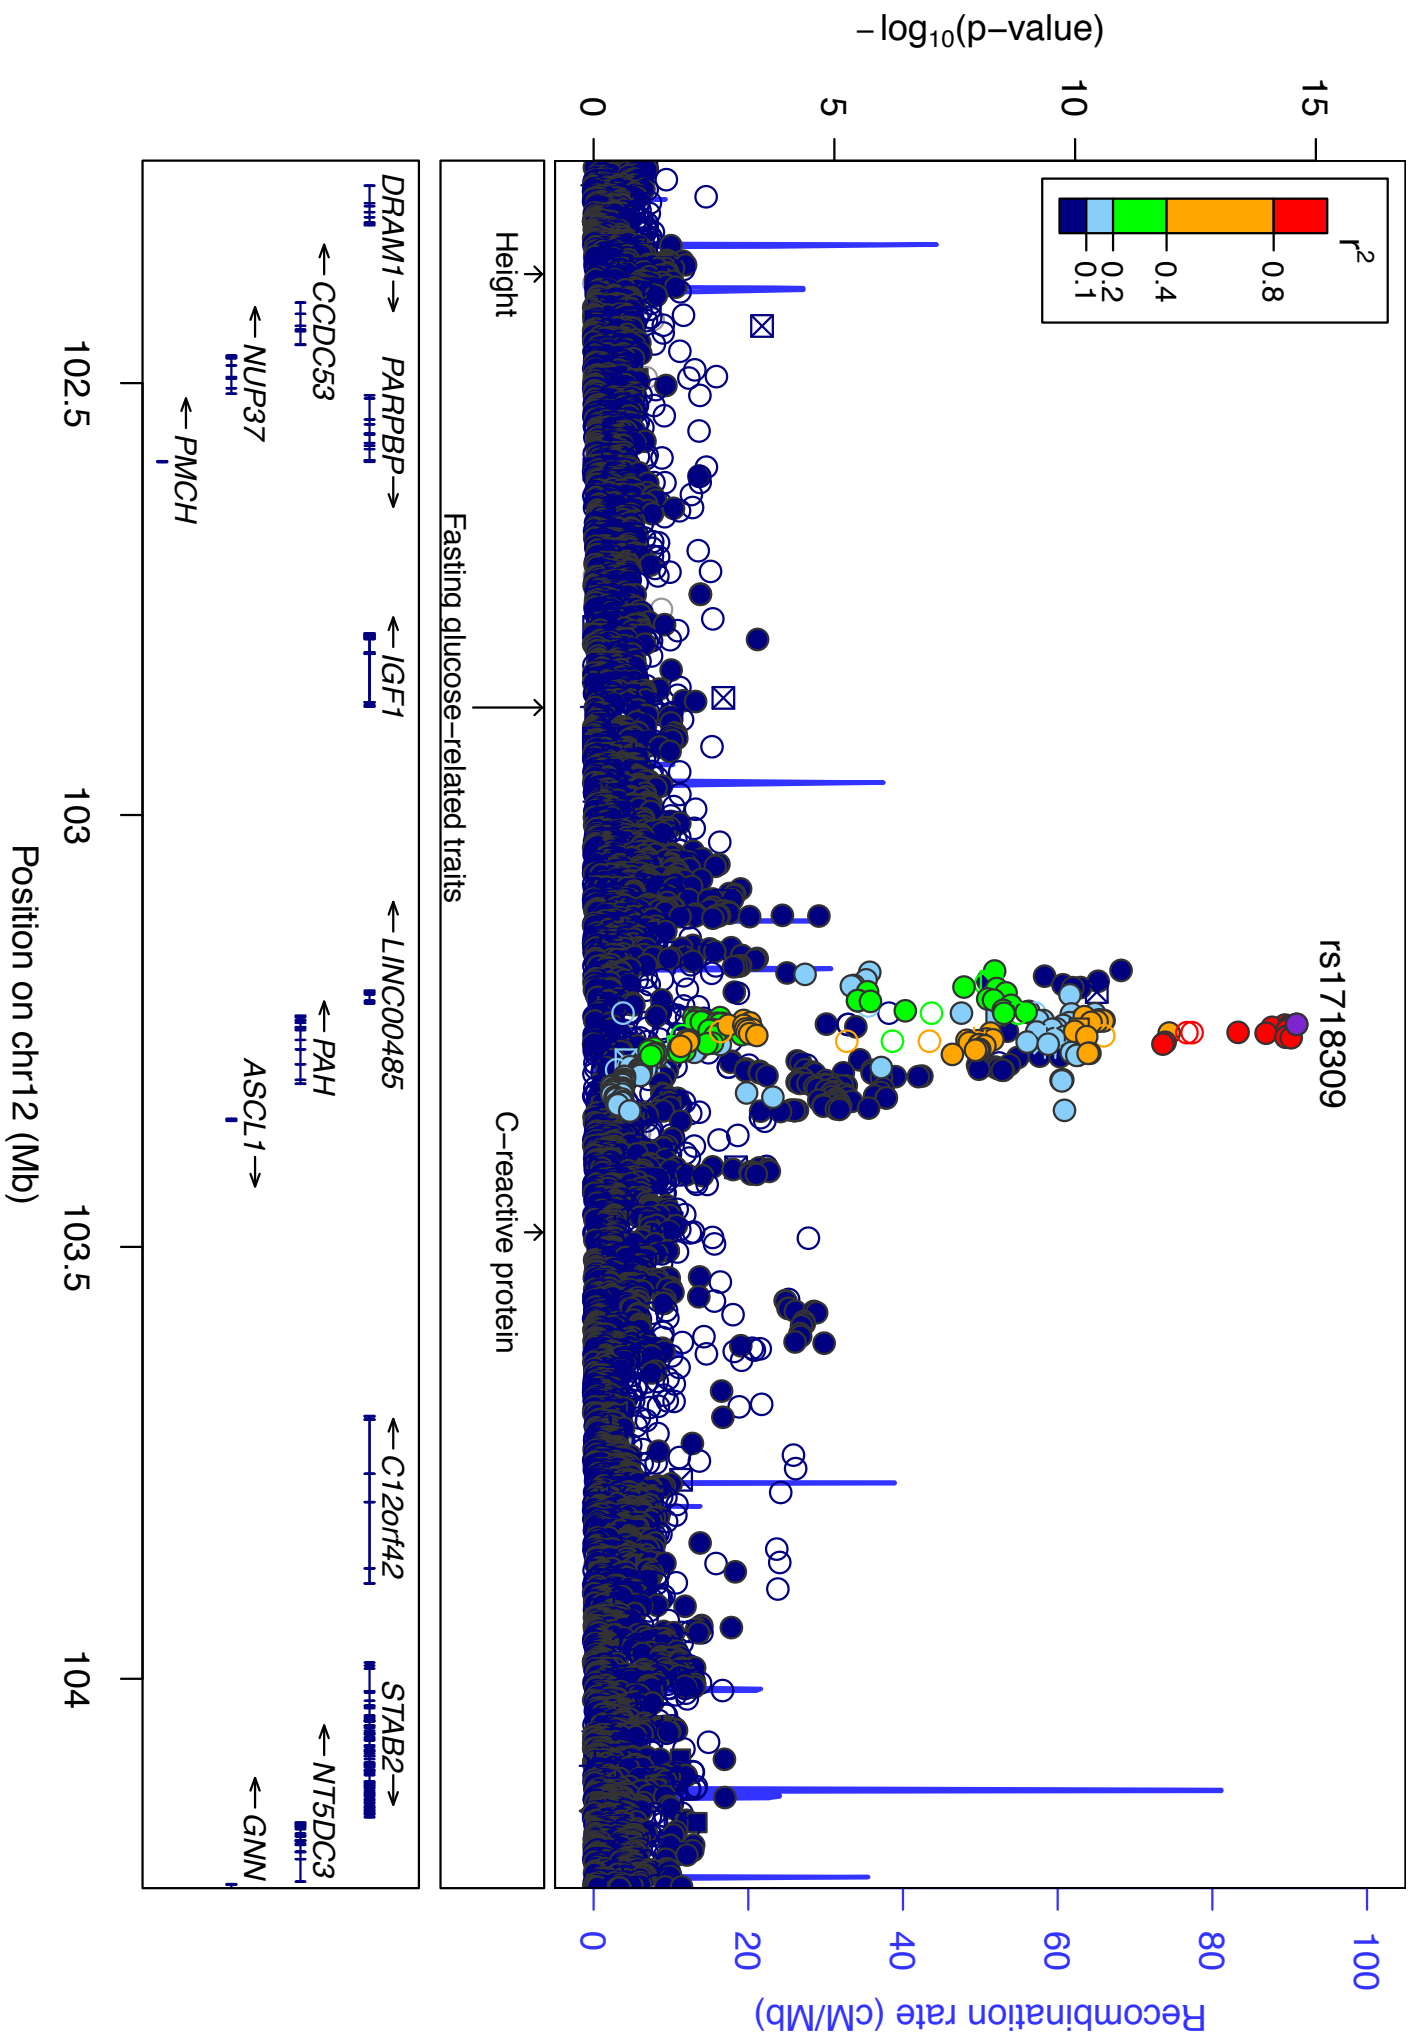

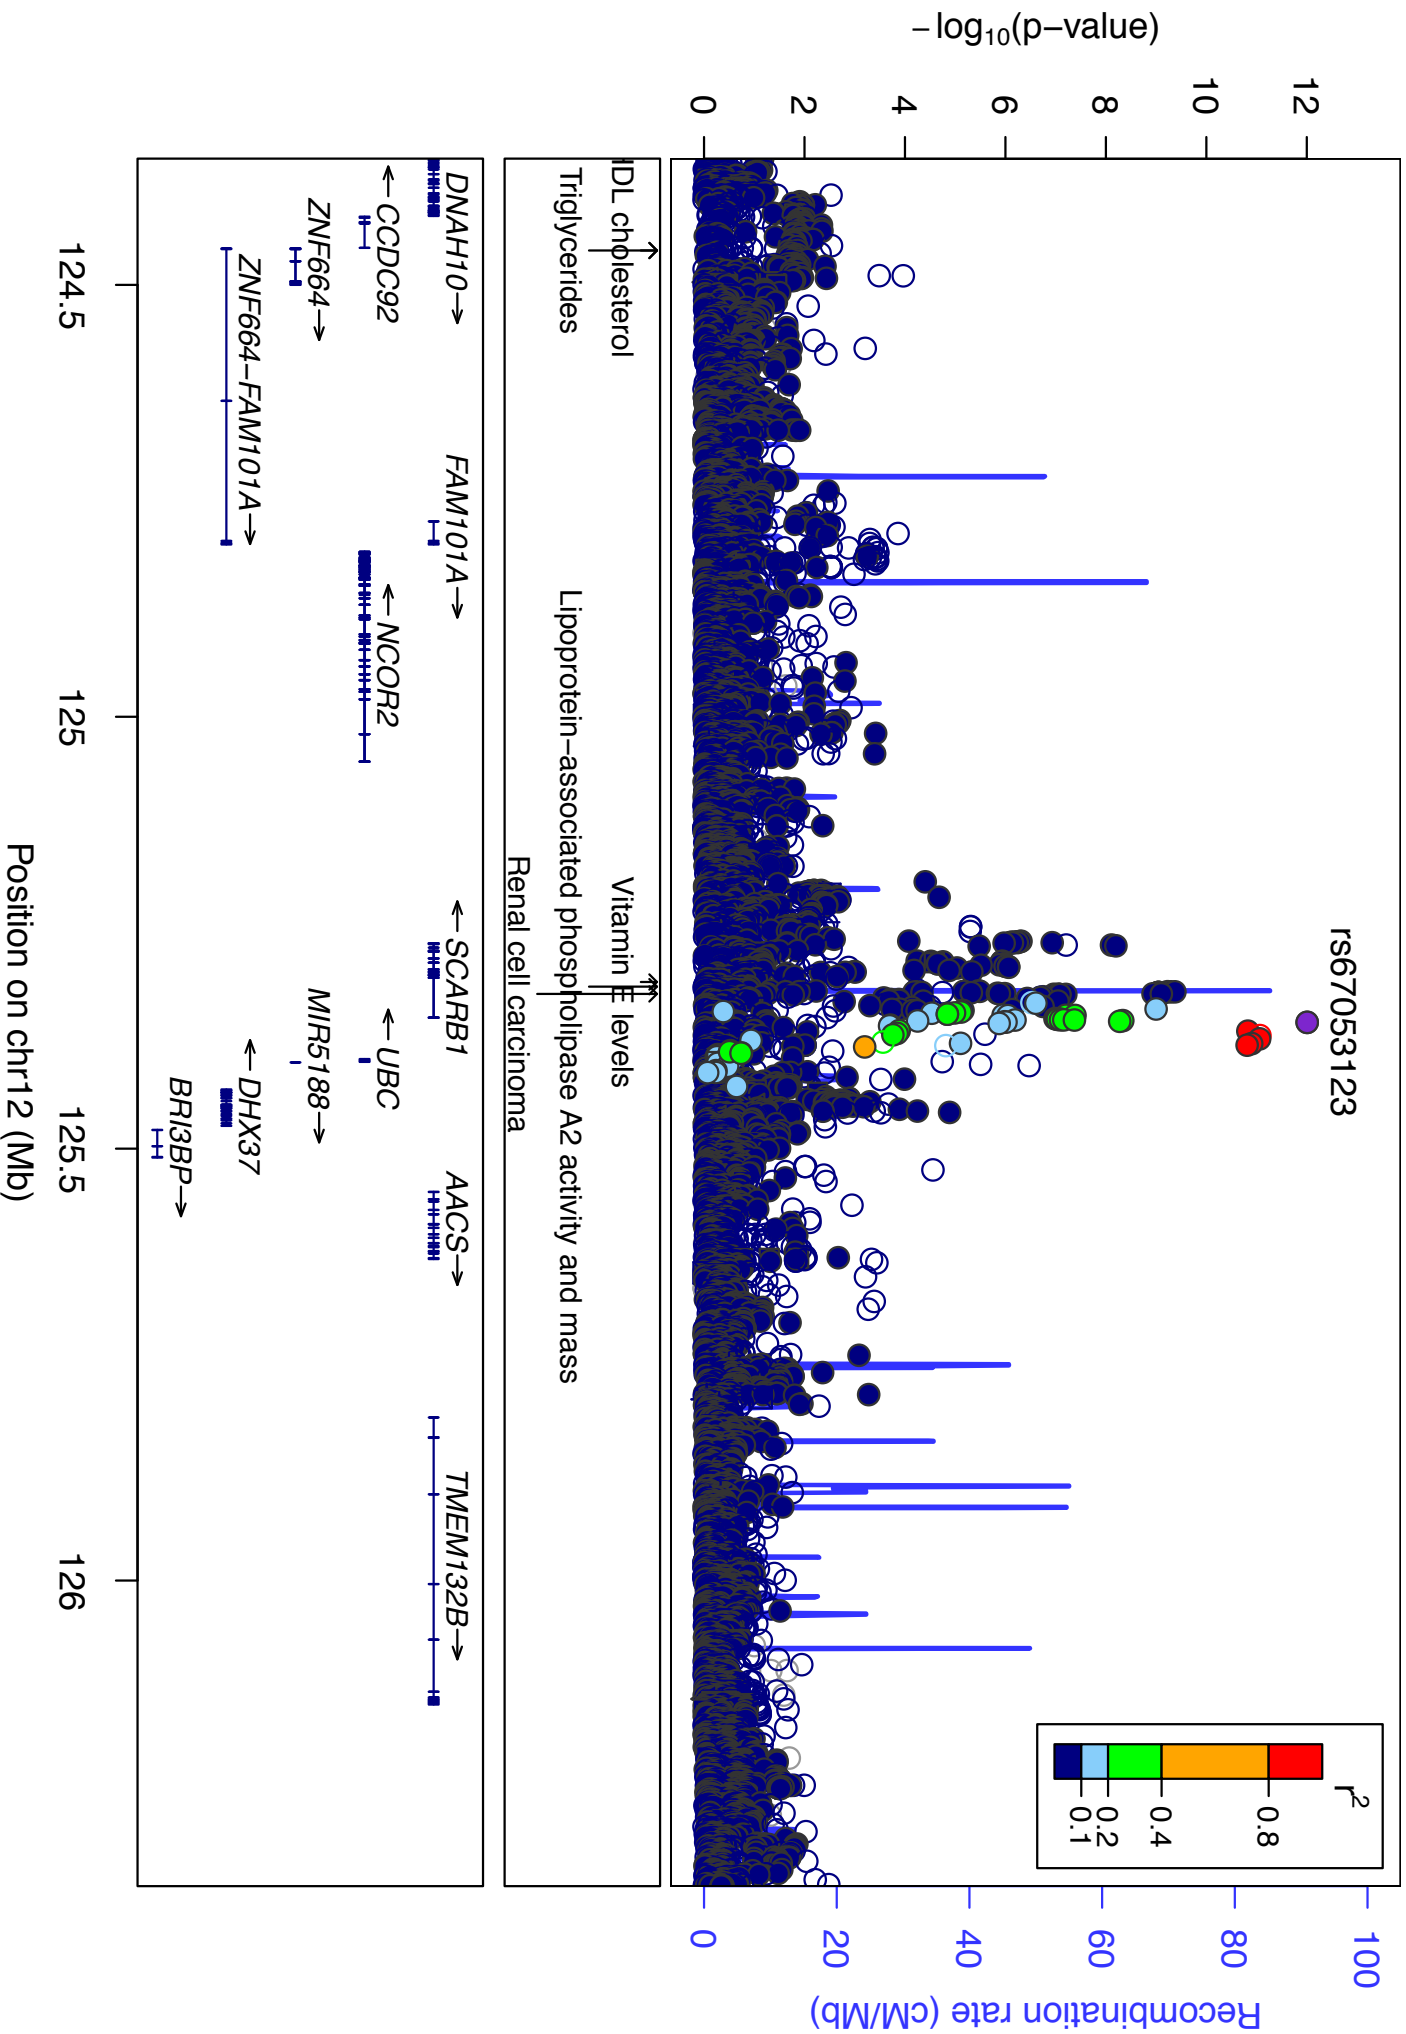

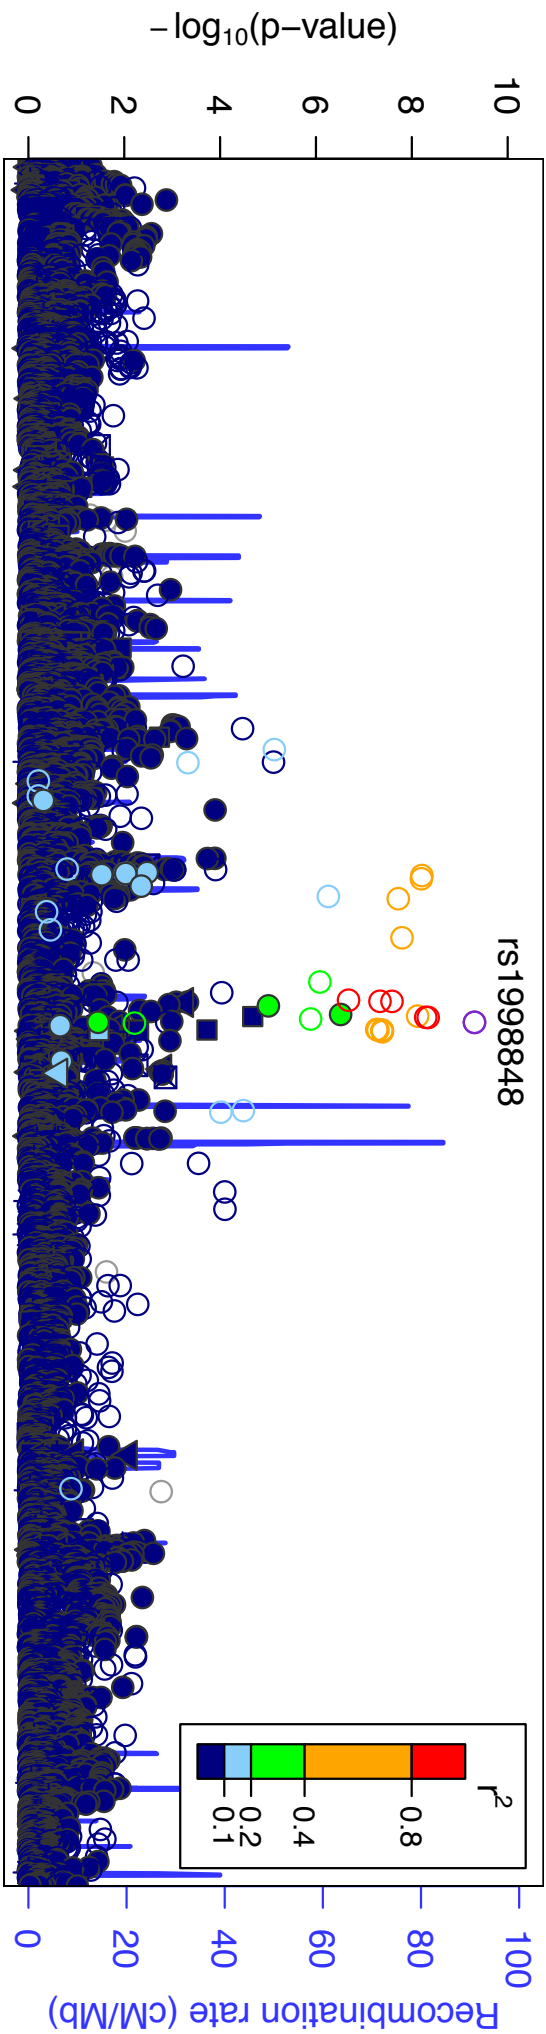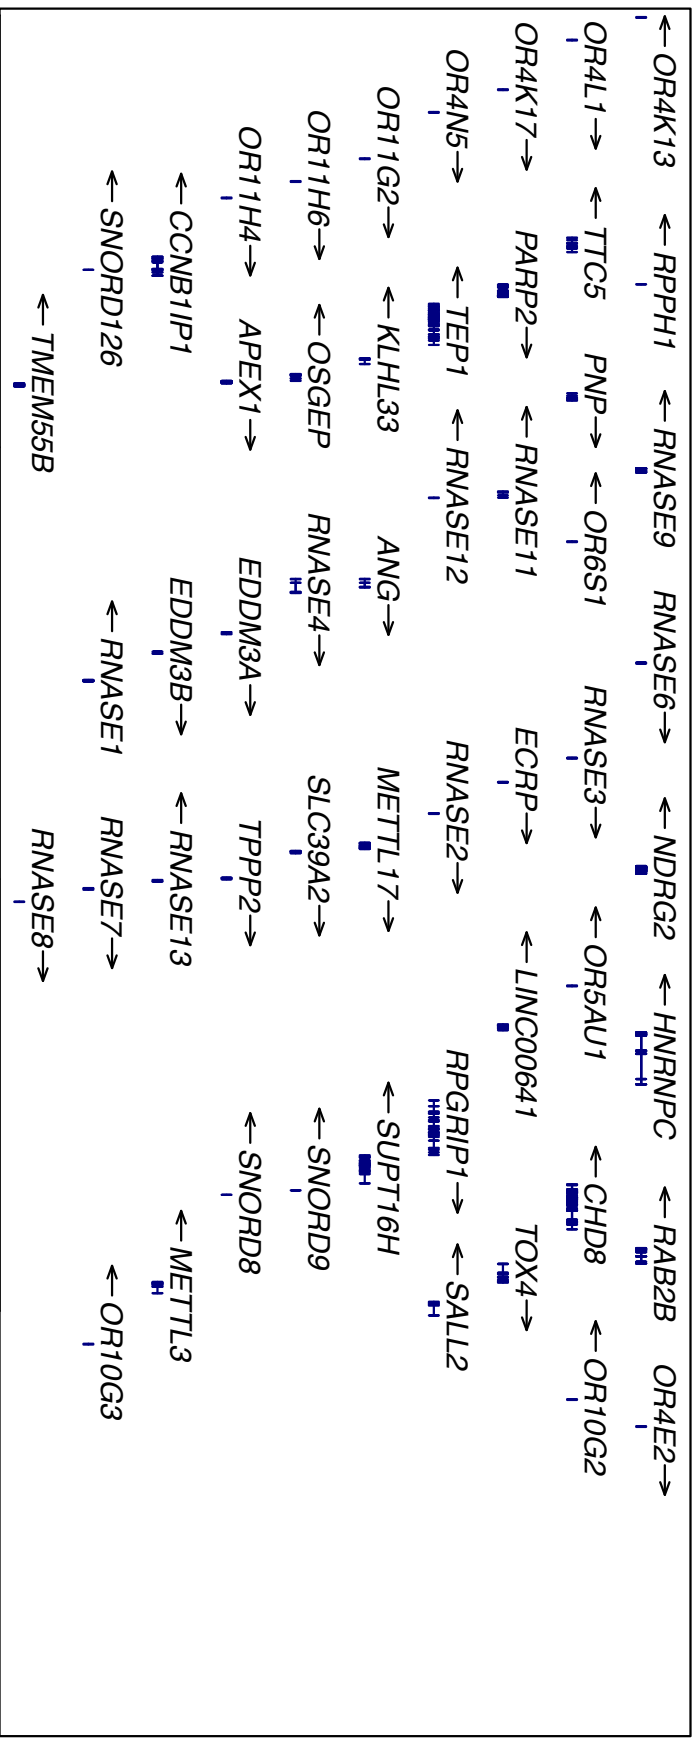

20.5      21      21.5      22

Position on chr14 (Mb)

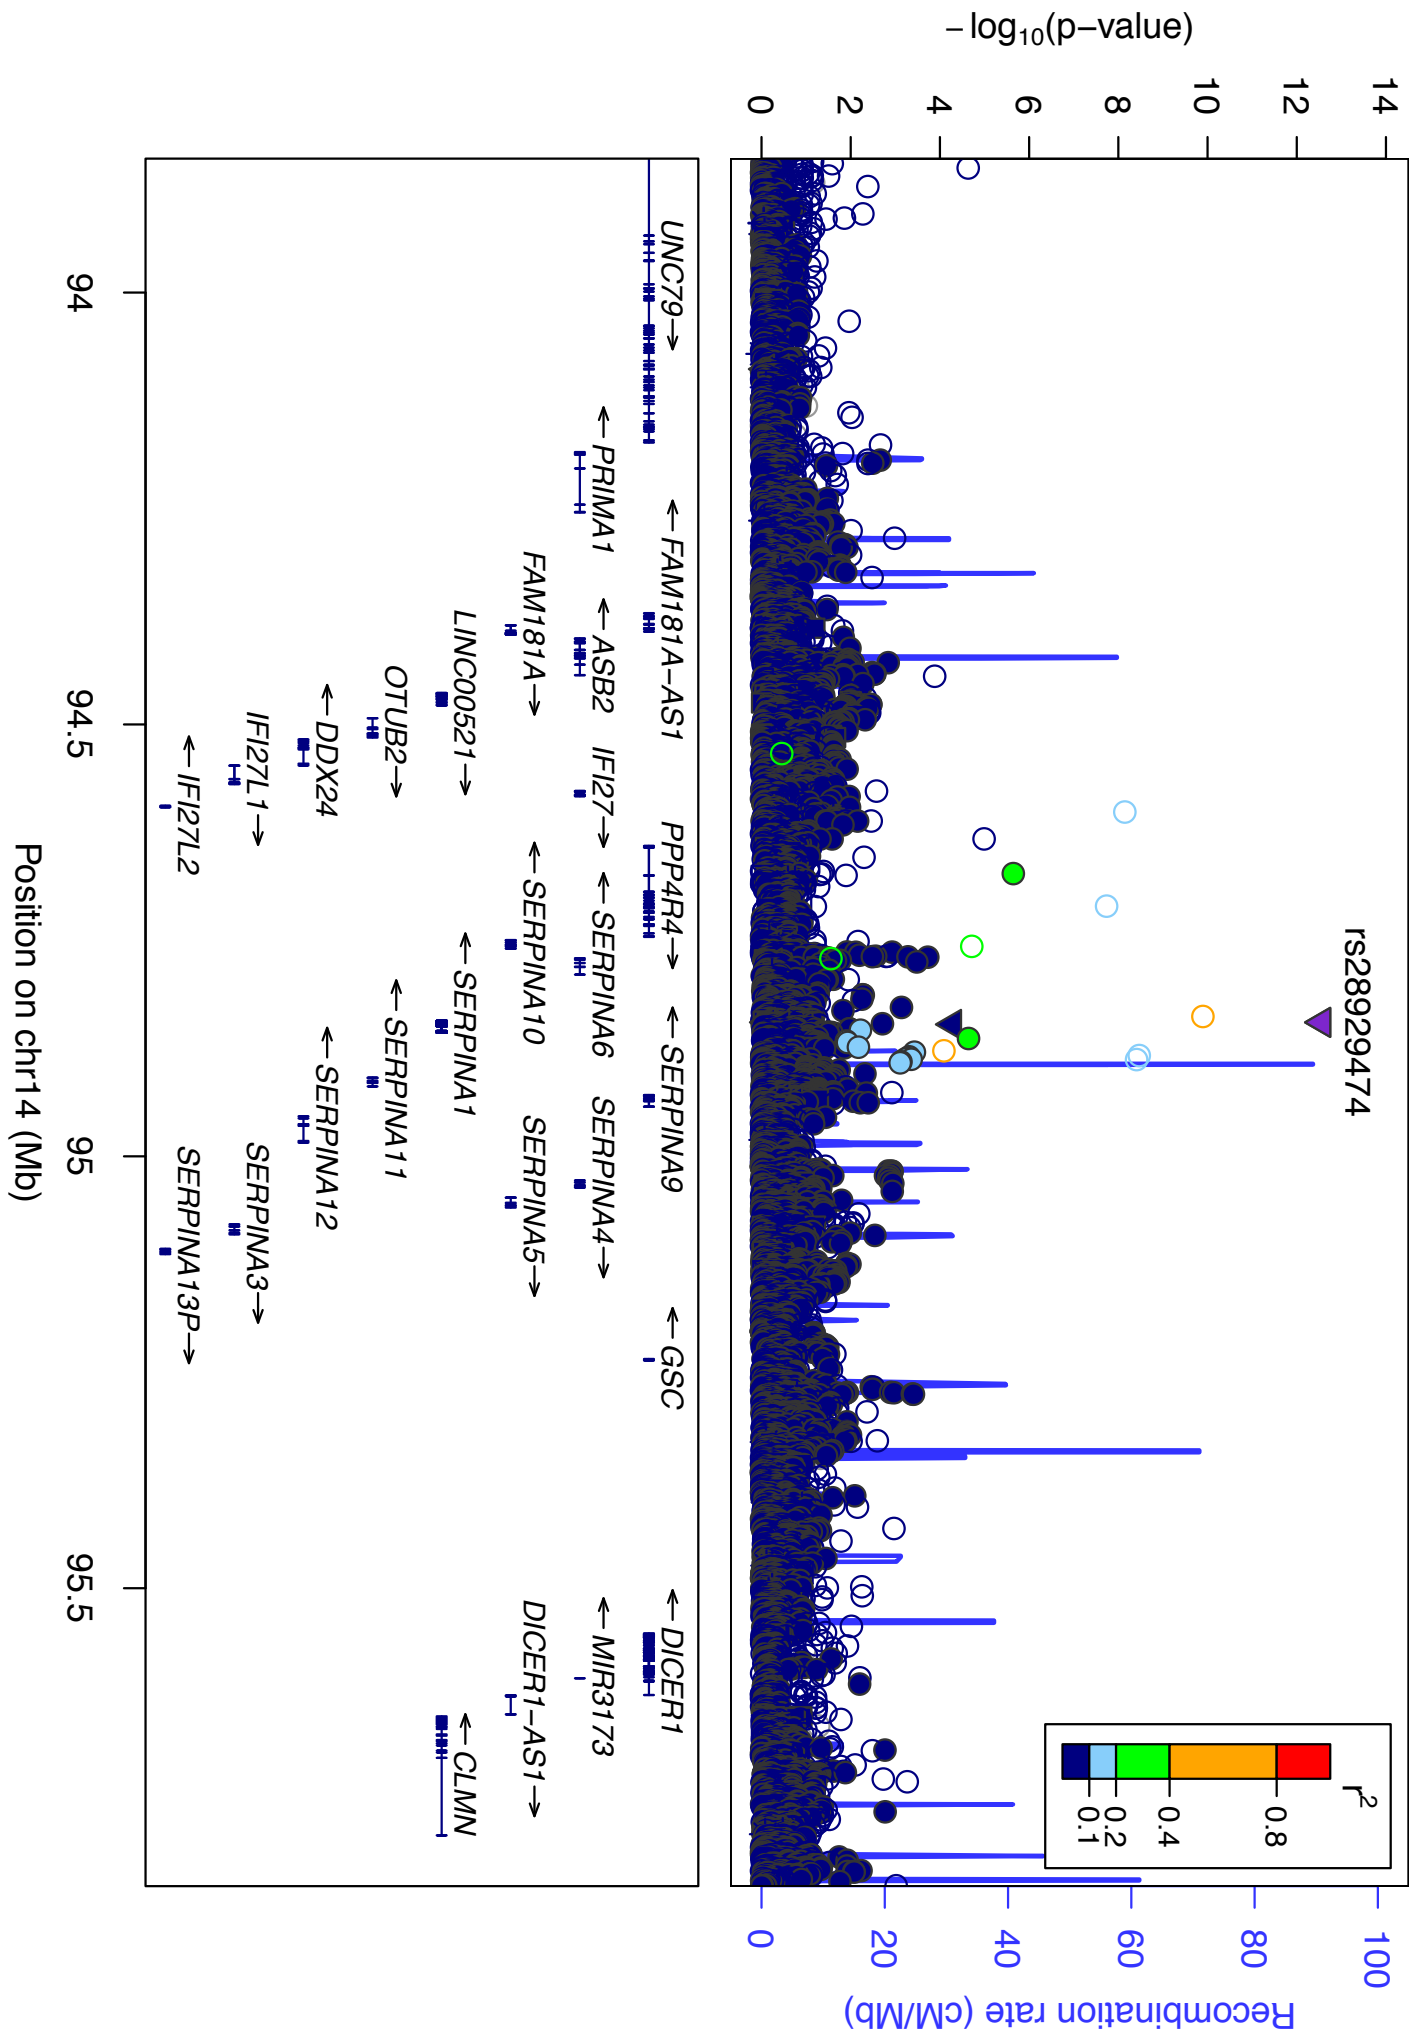

$-\log_{10}(\text{p-value})$

0 2 4 6 8 10 12 14

rs28929474

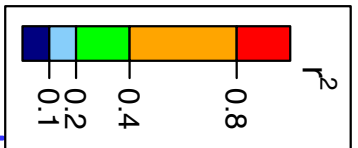

Recombination rate (cM/Mb)

0 20 40 60 80 100

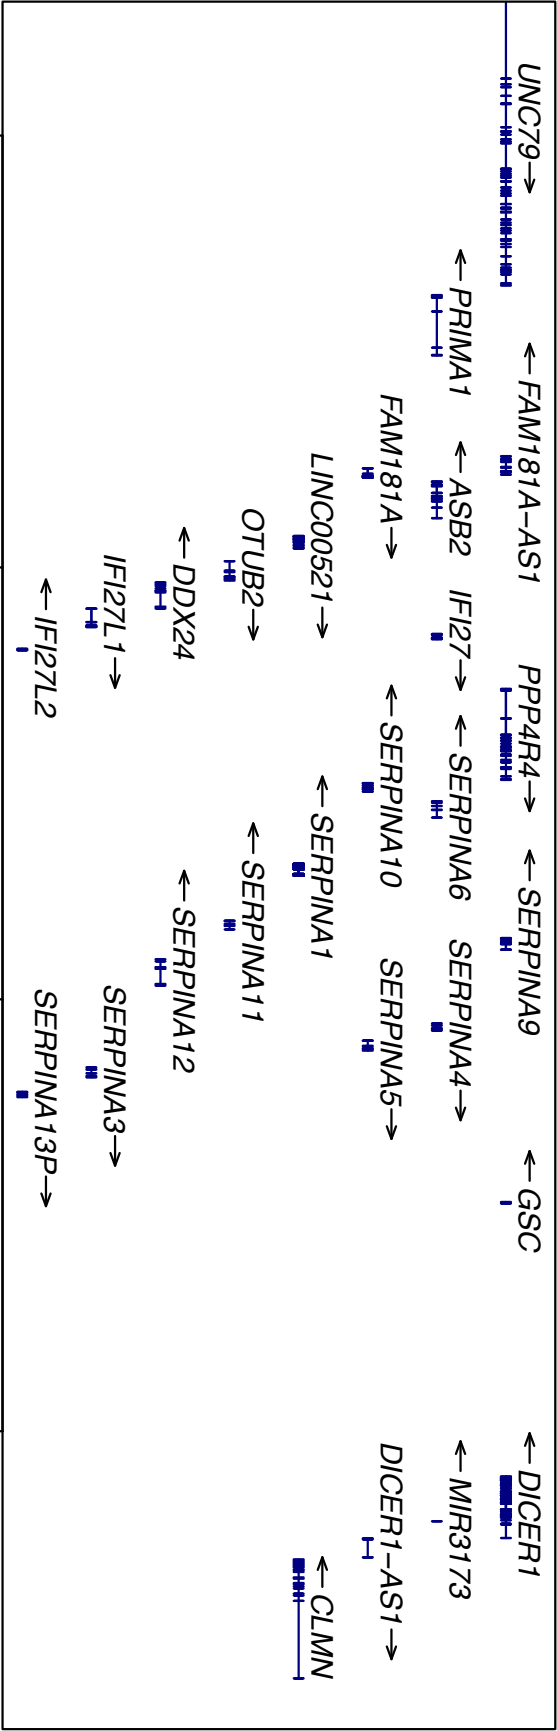

94

94.5

95

95.5

Position on chr14 (Mb)

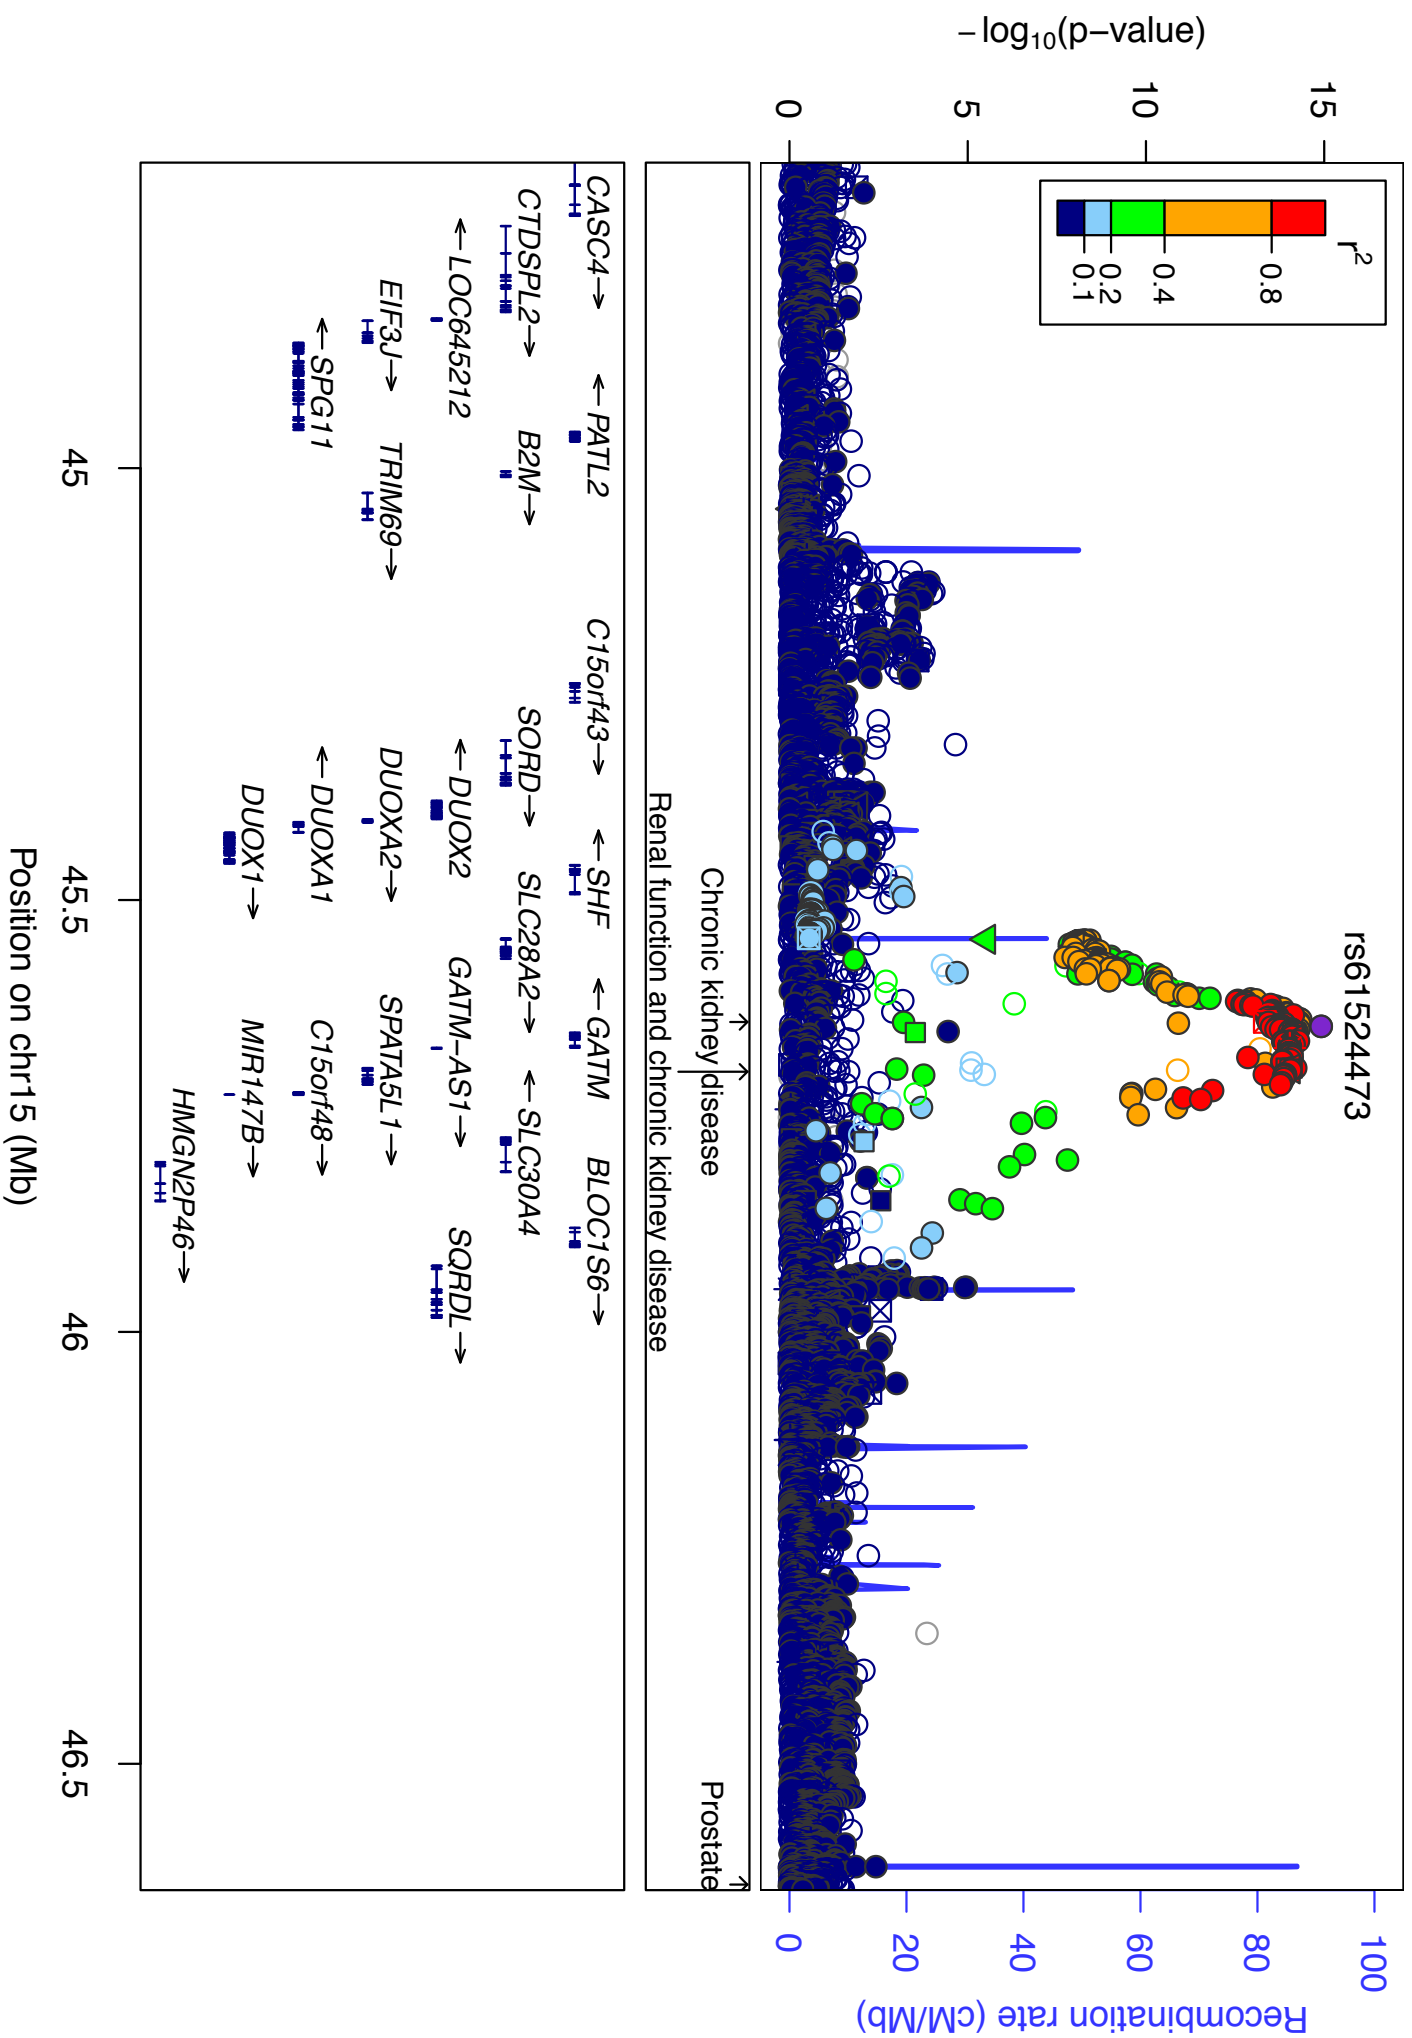

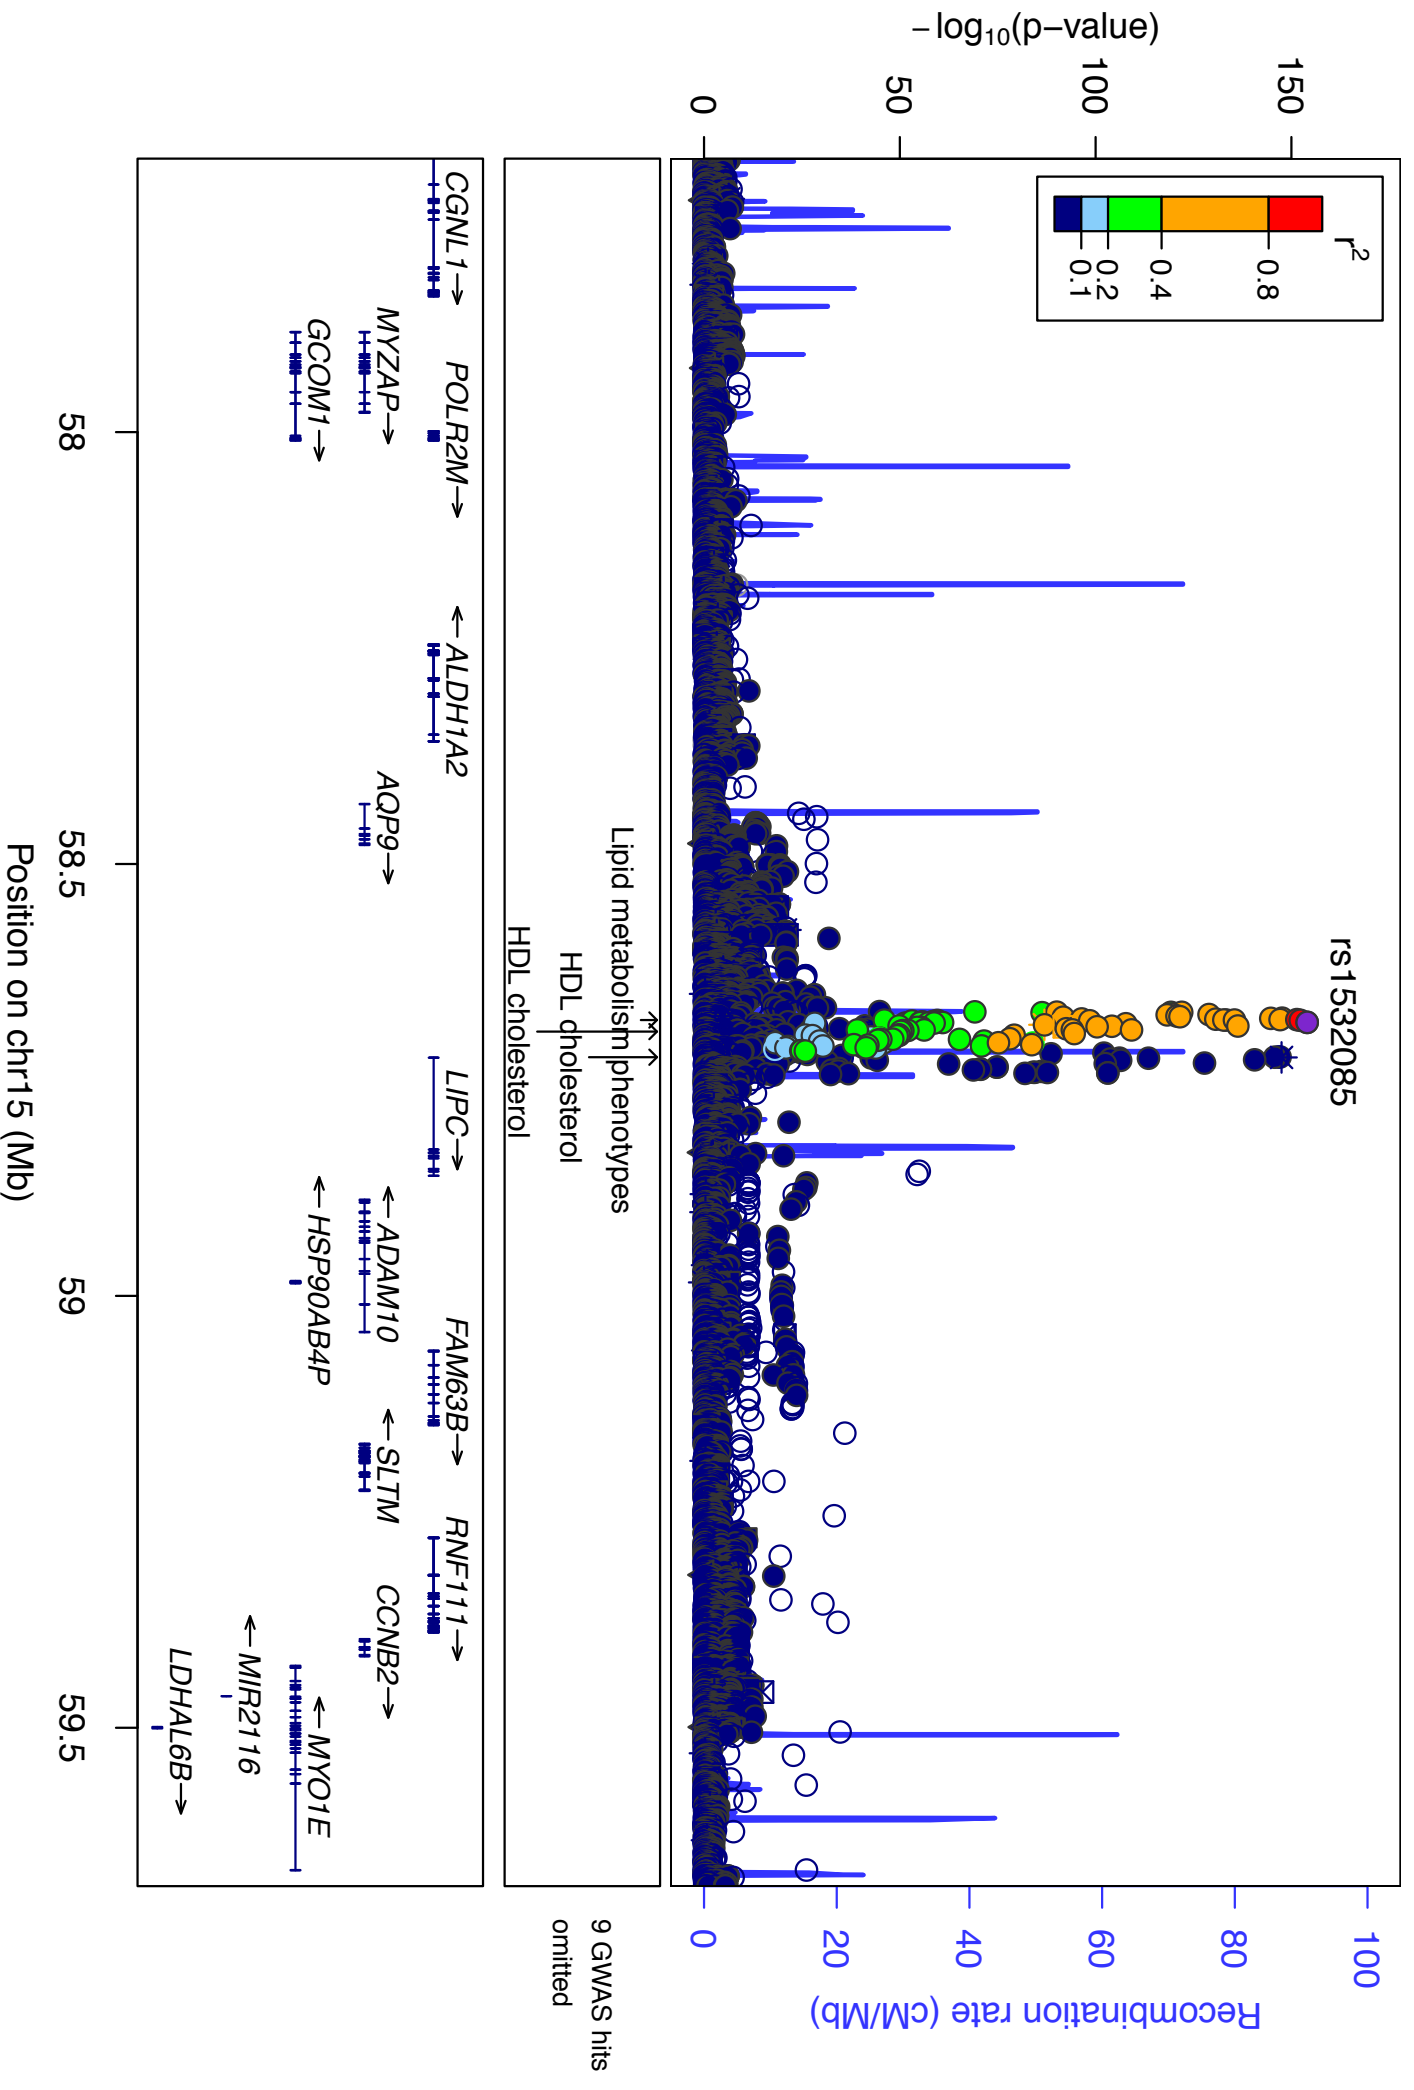

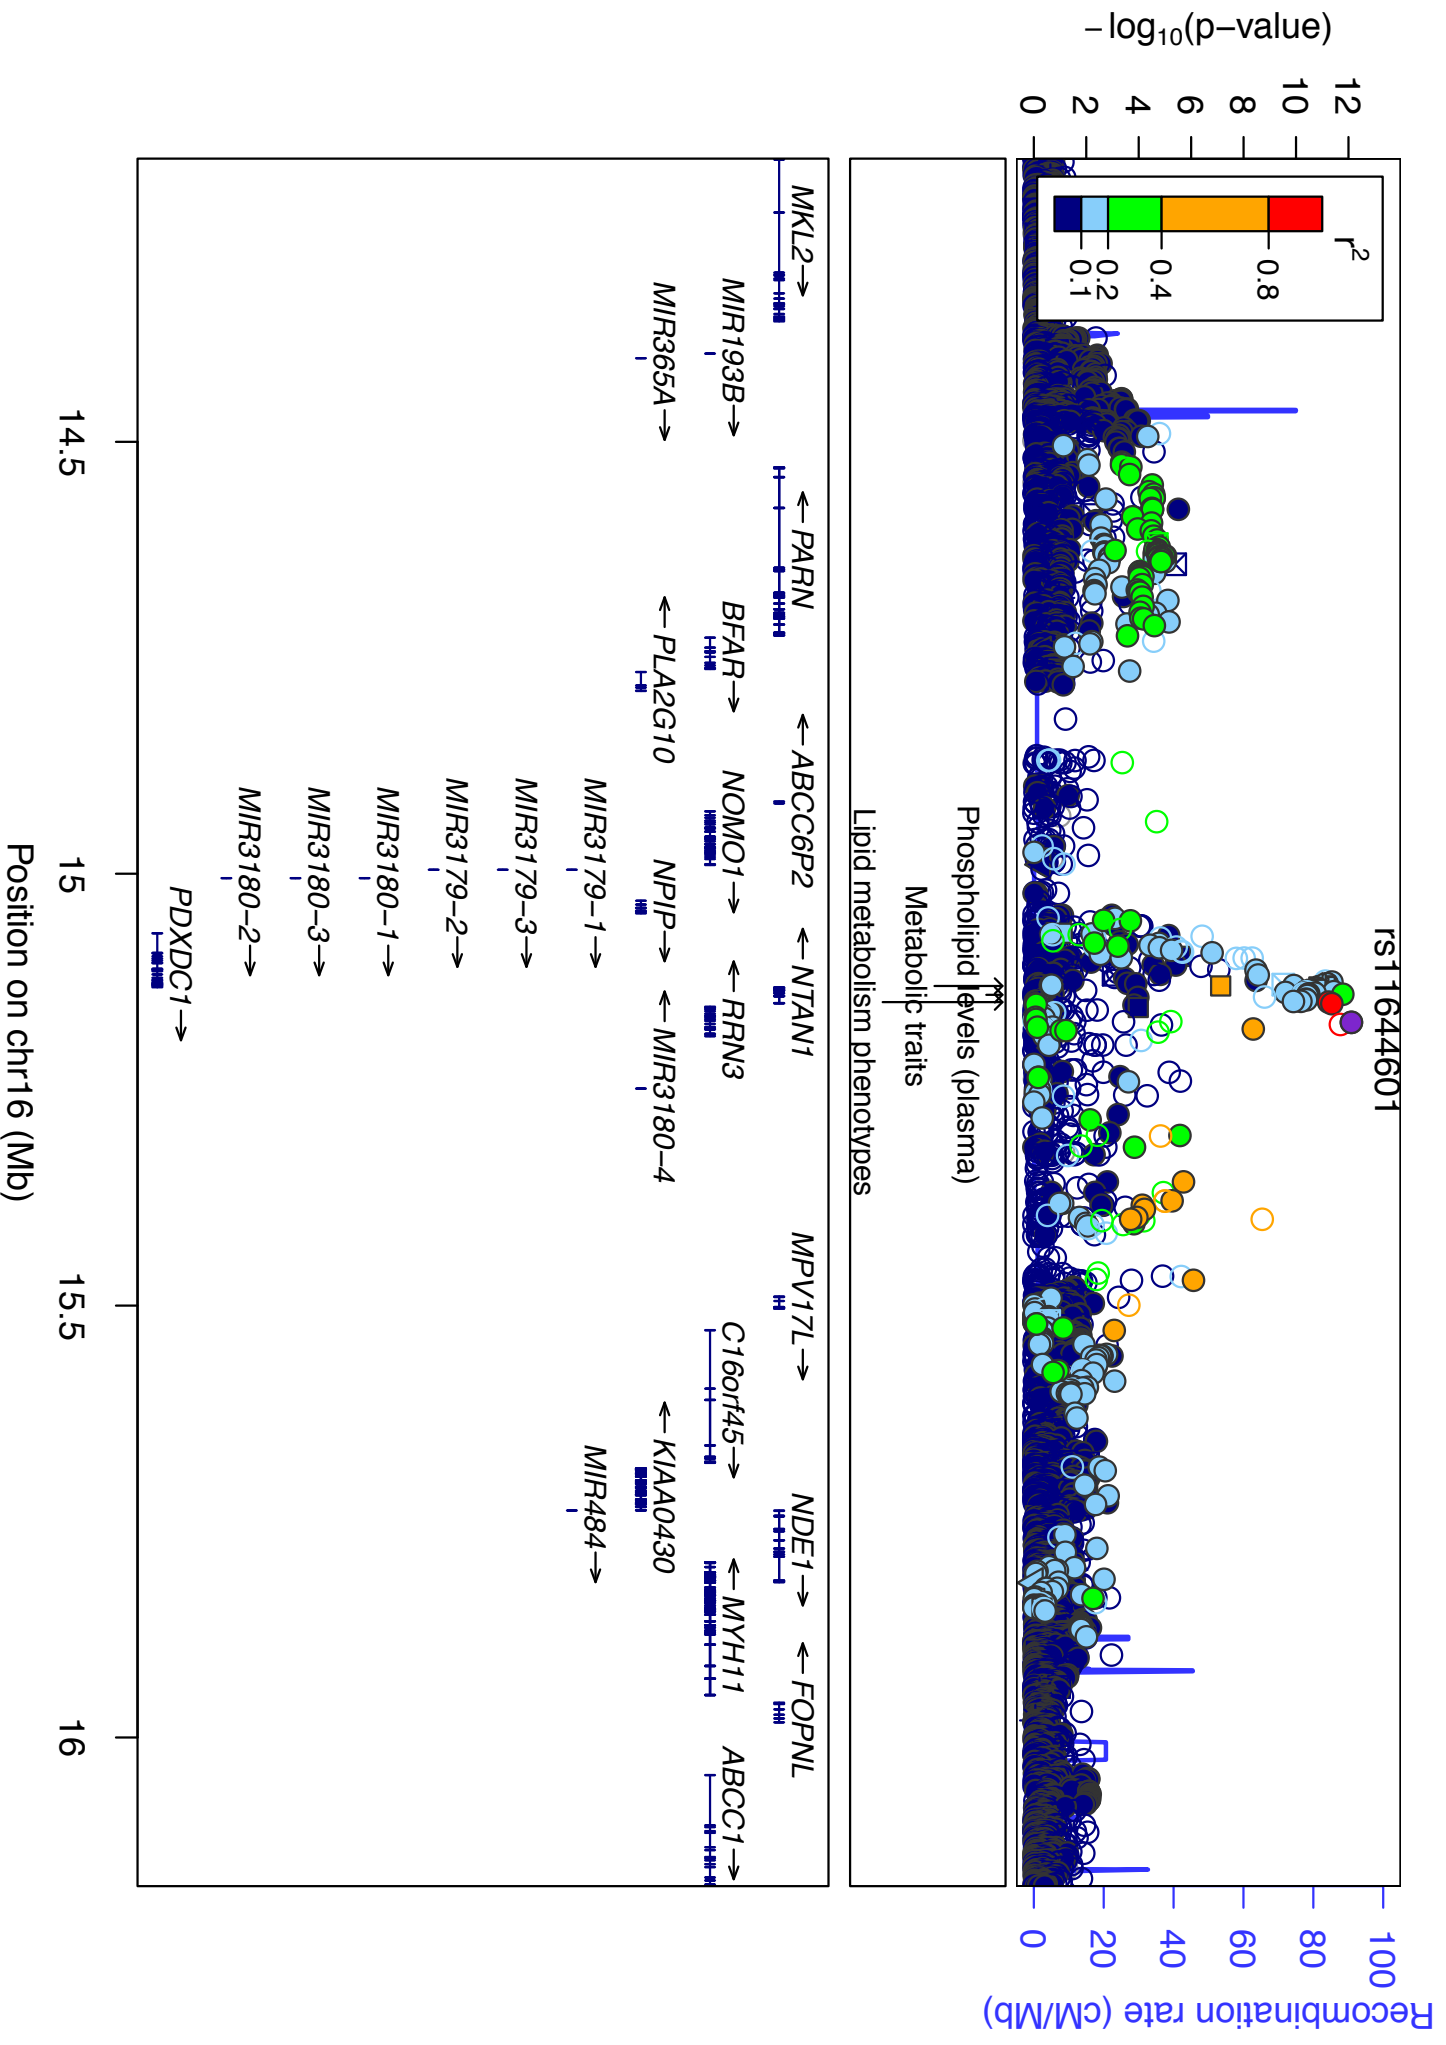



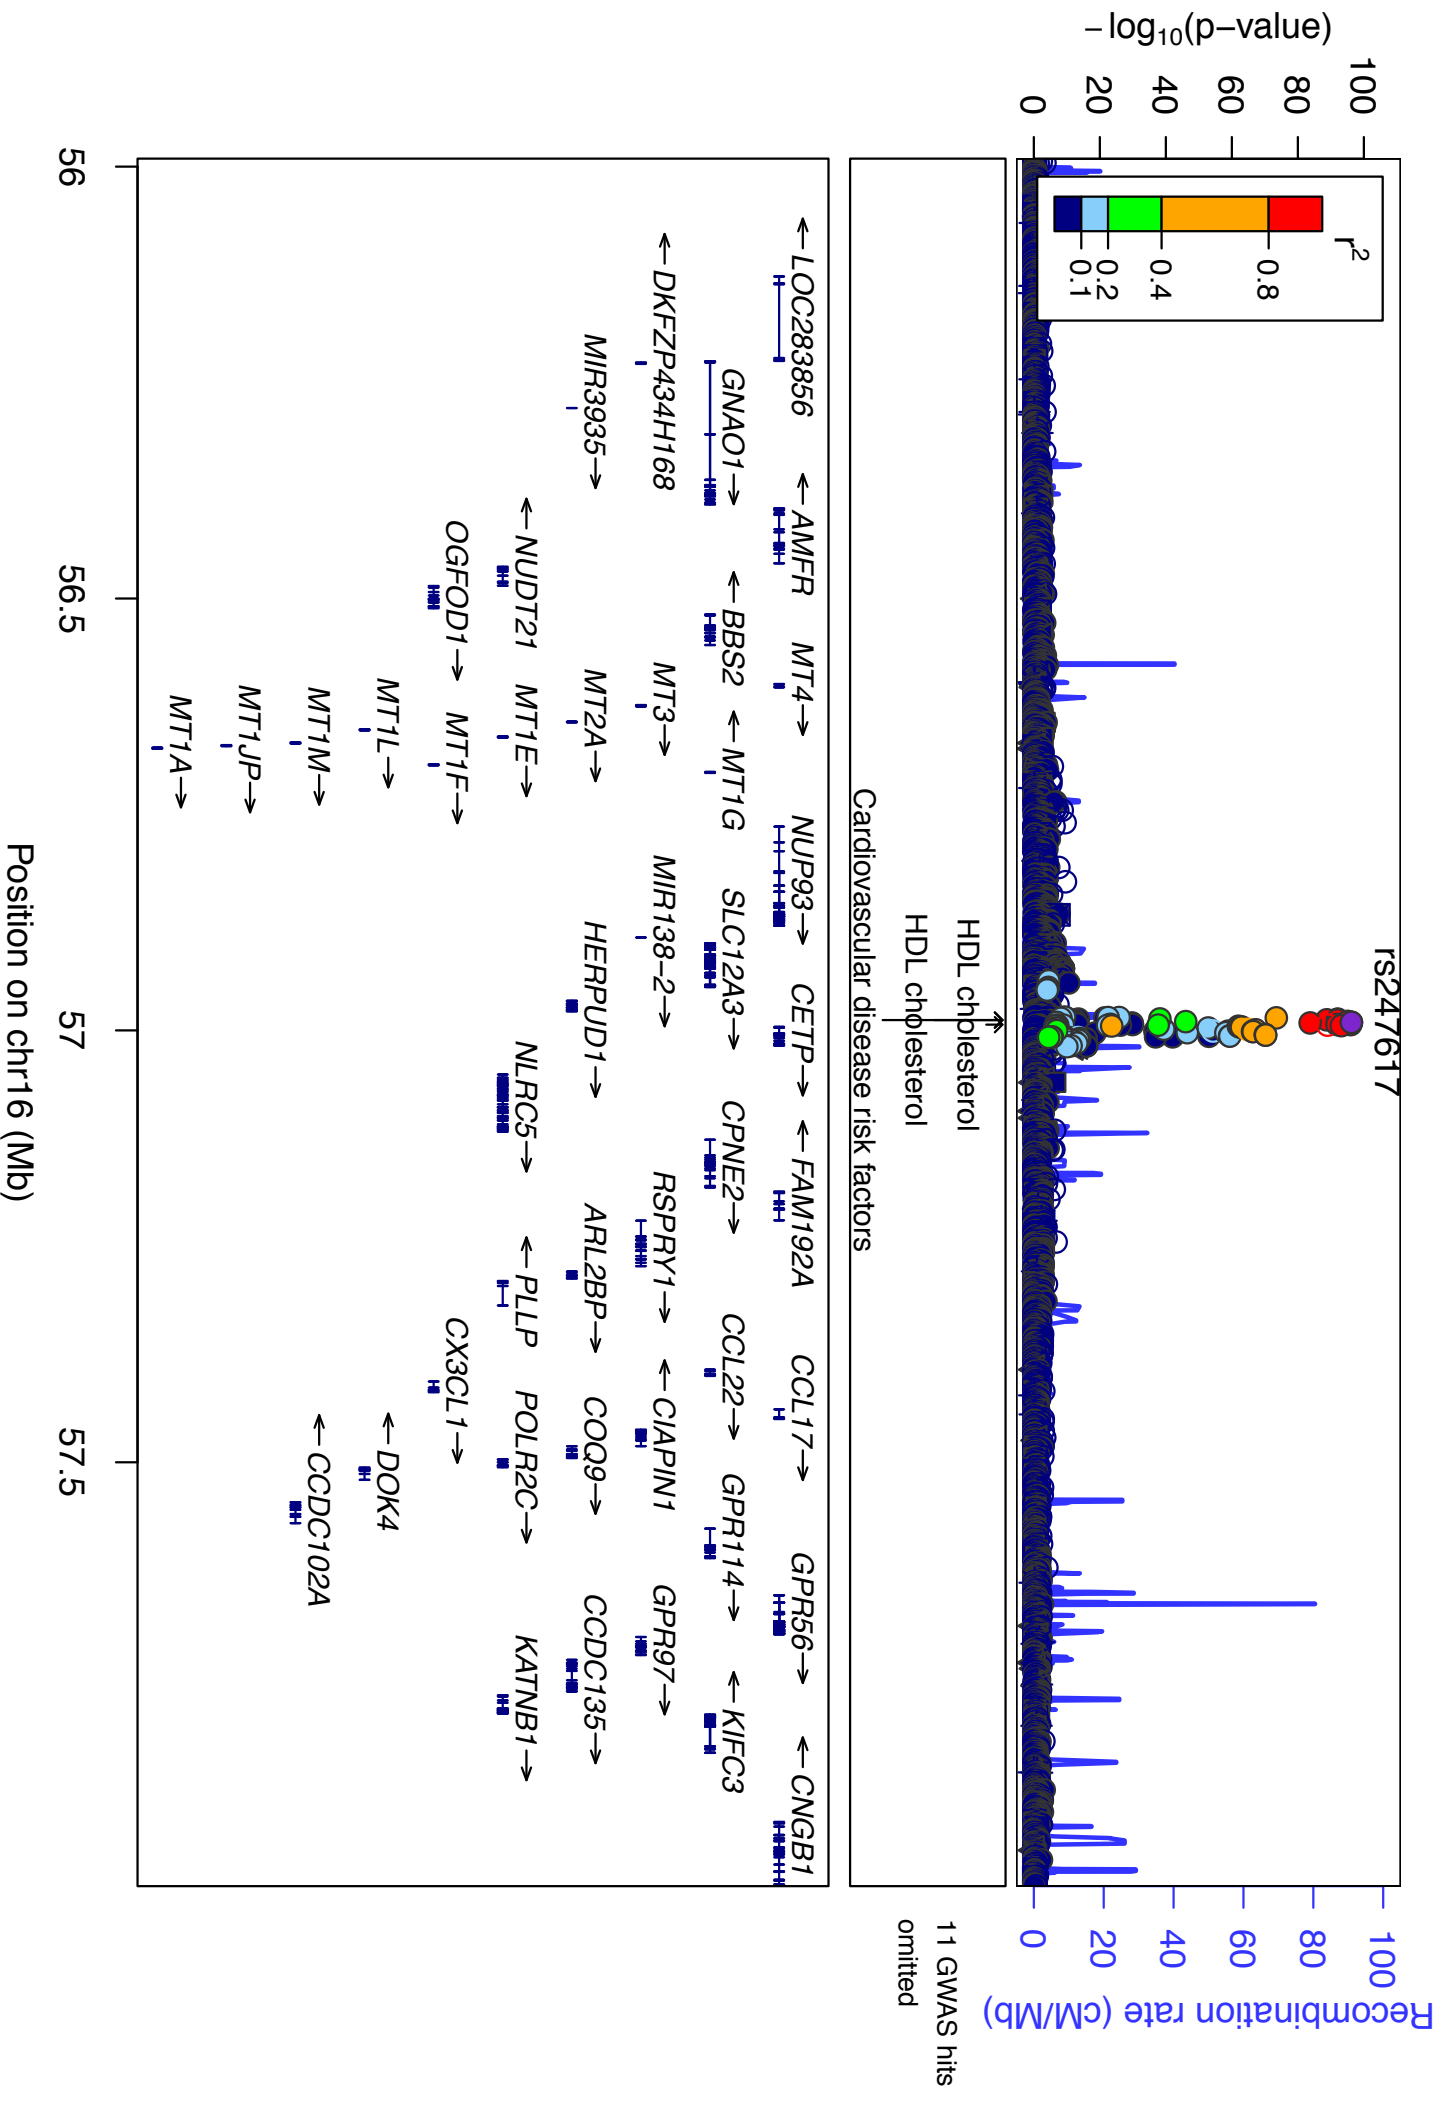

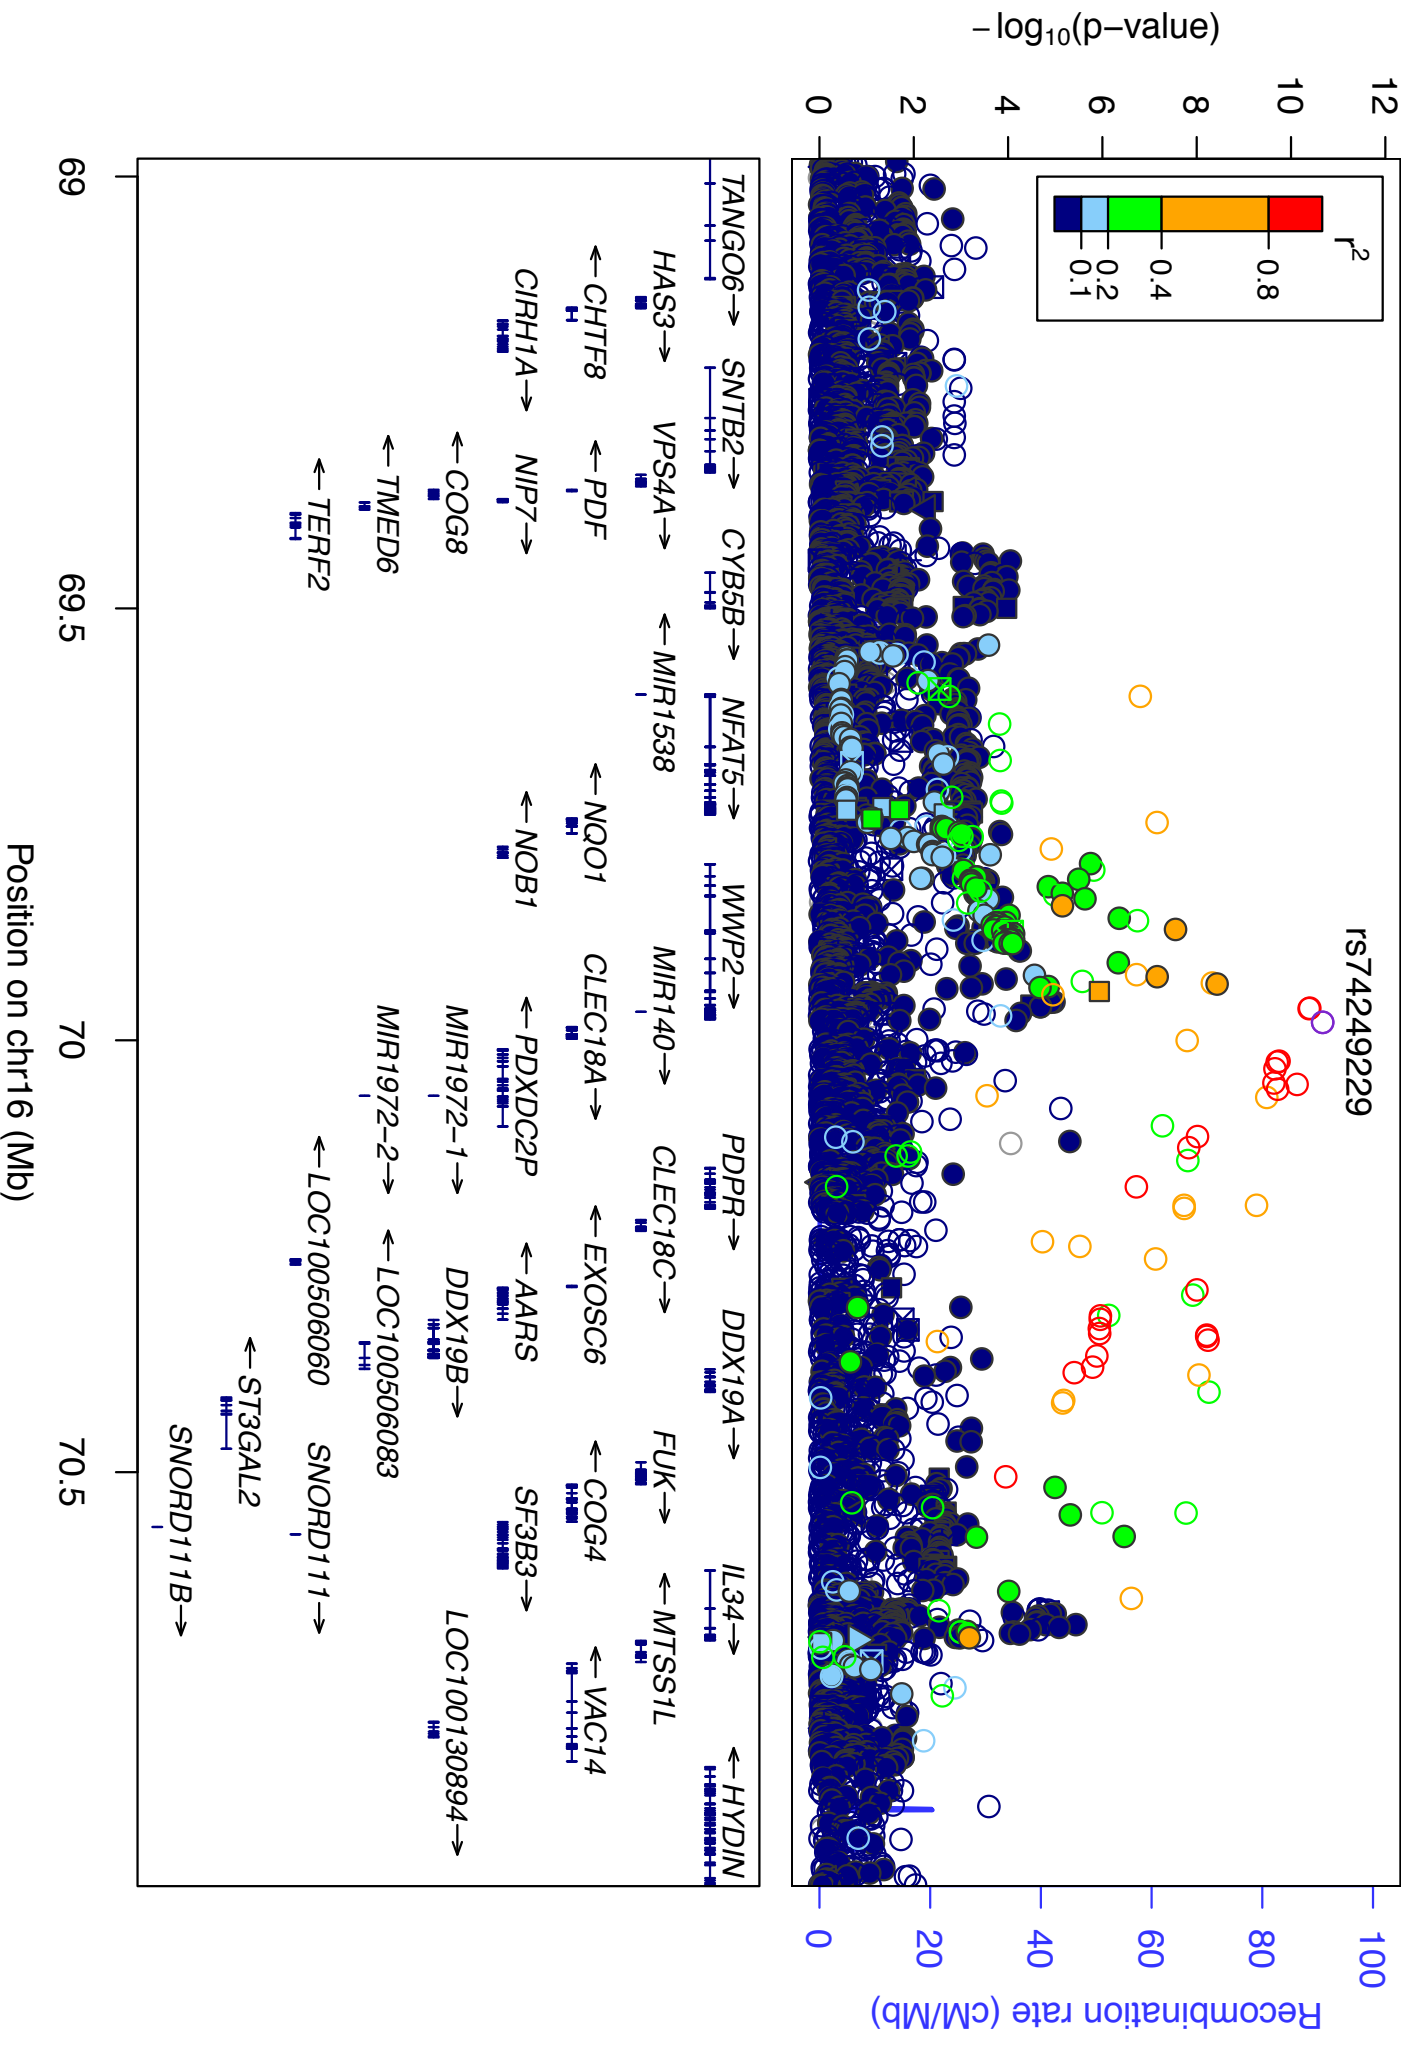



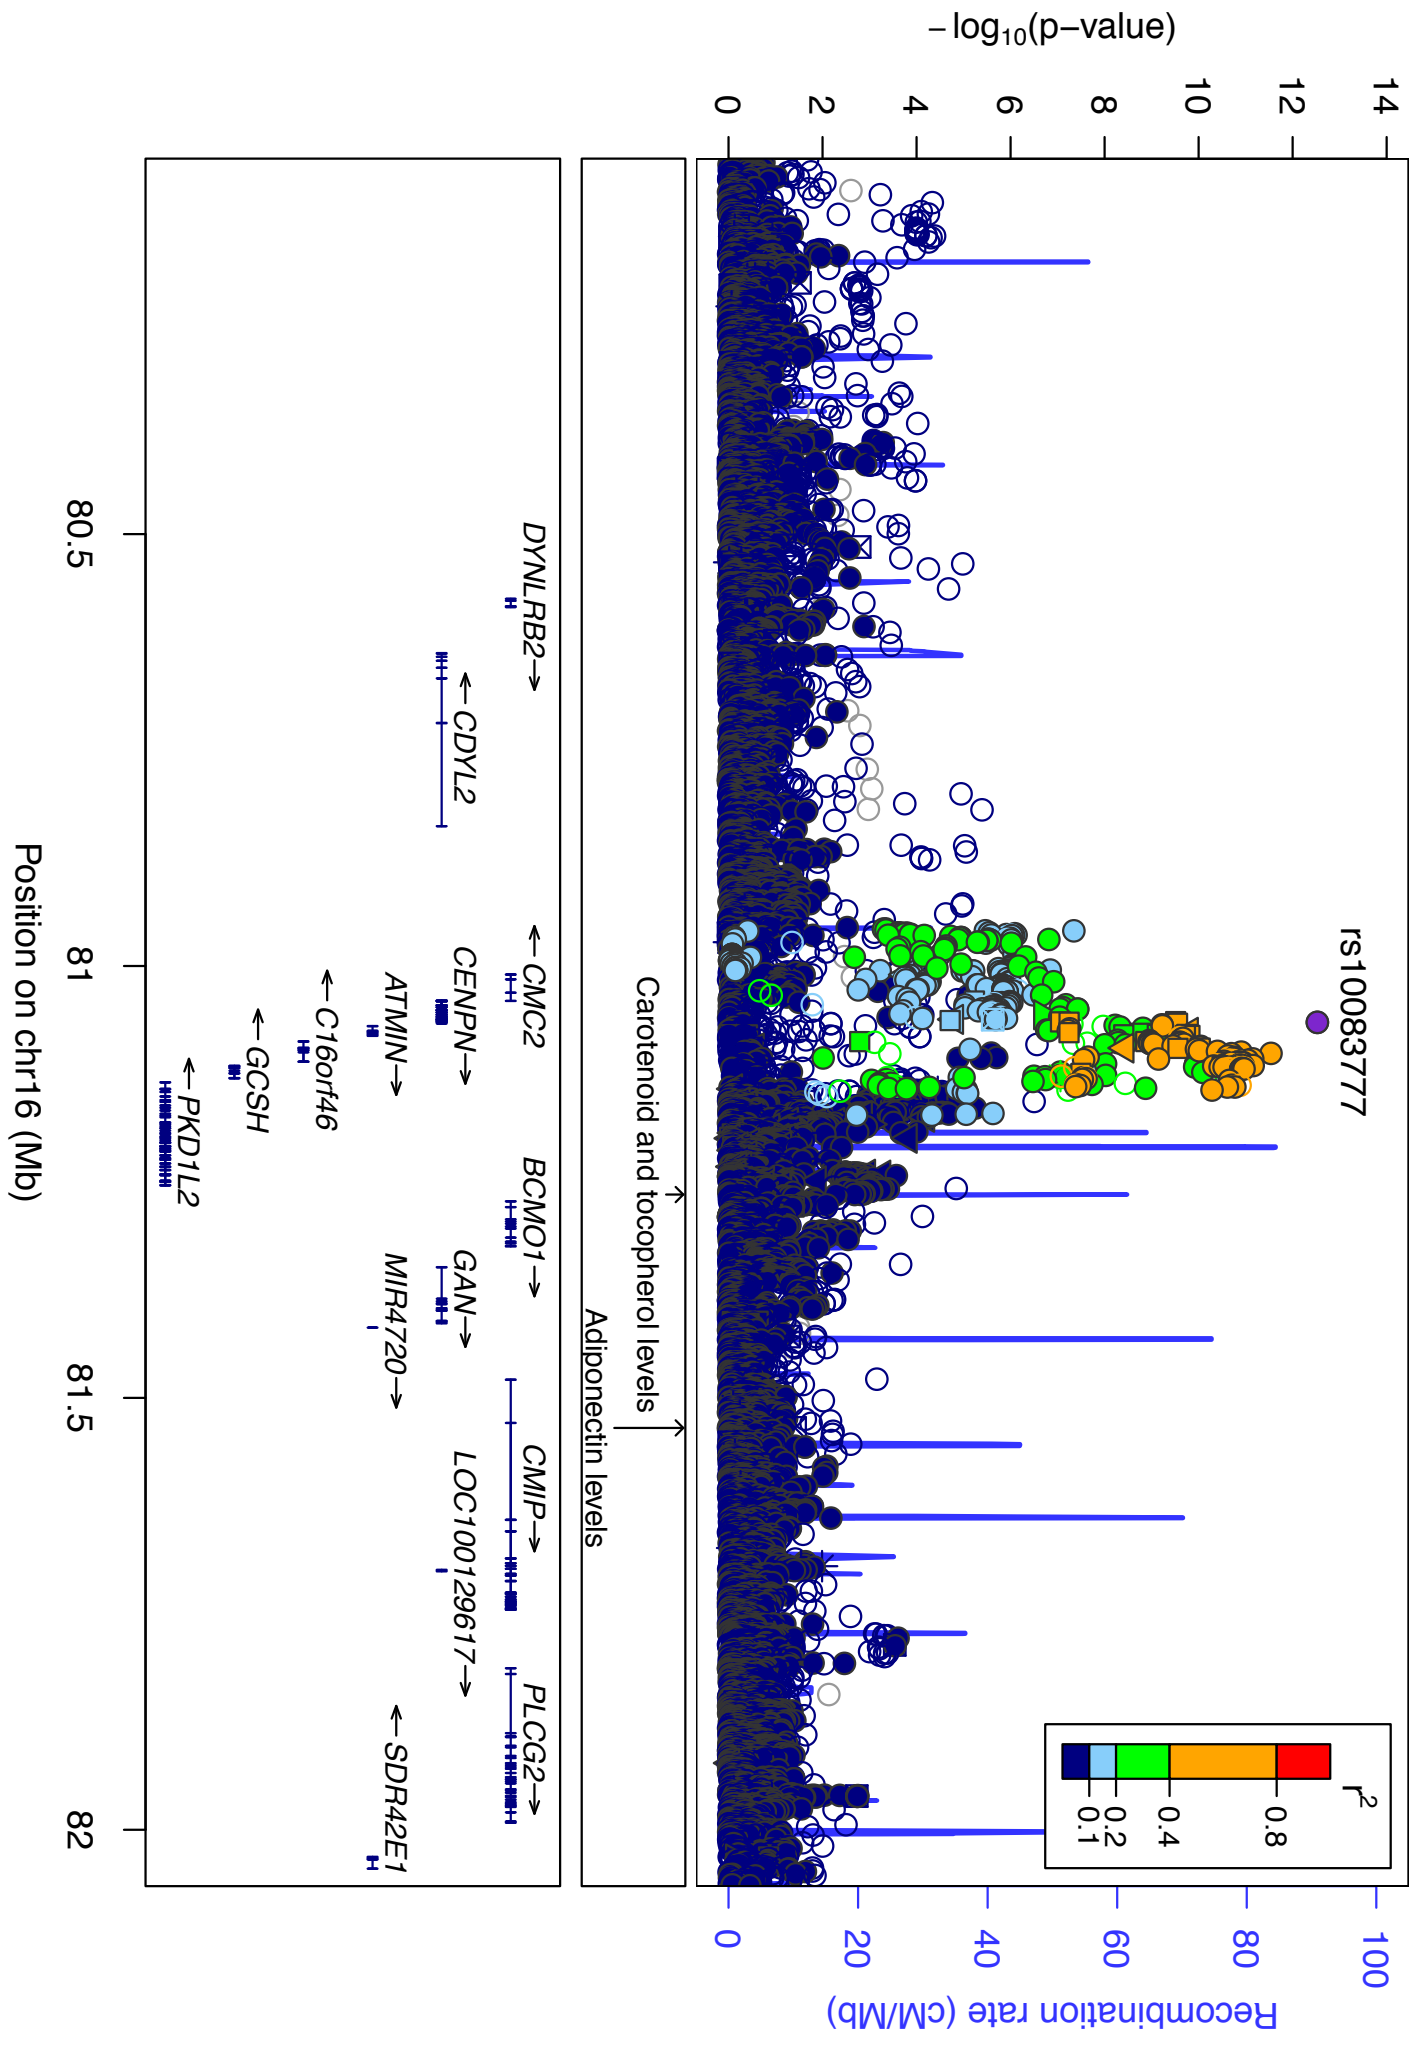

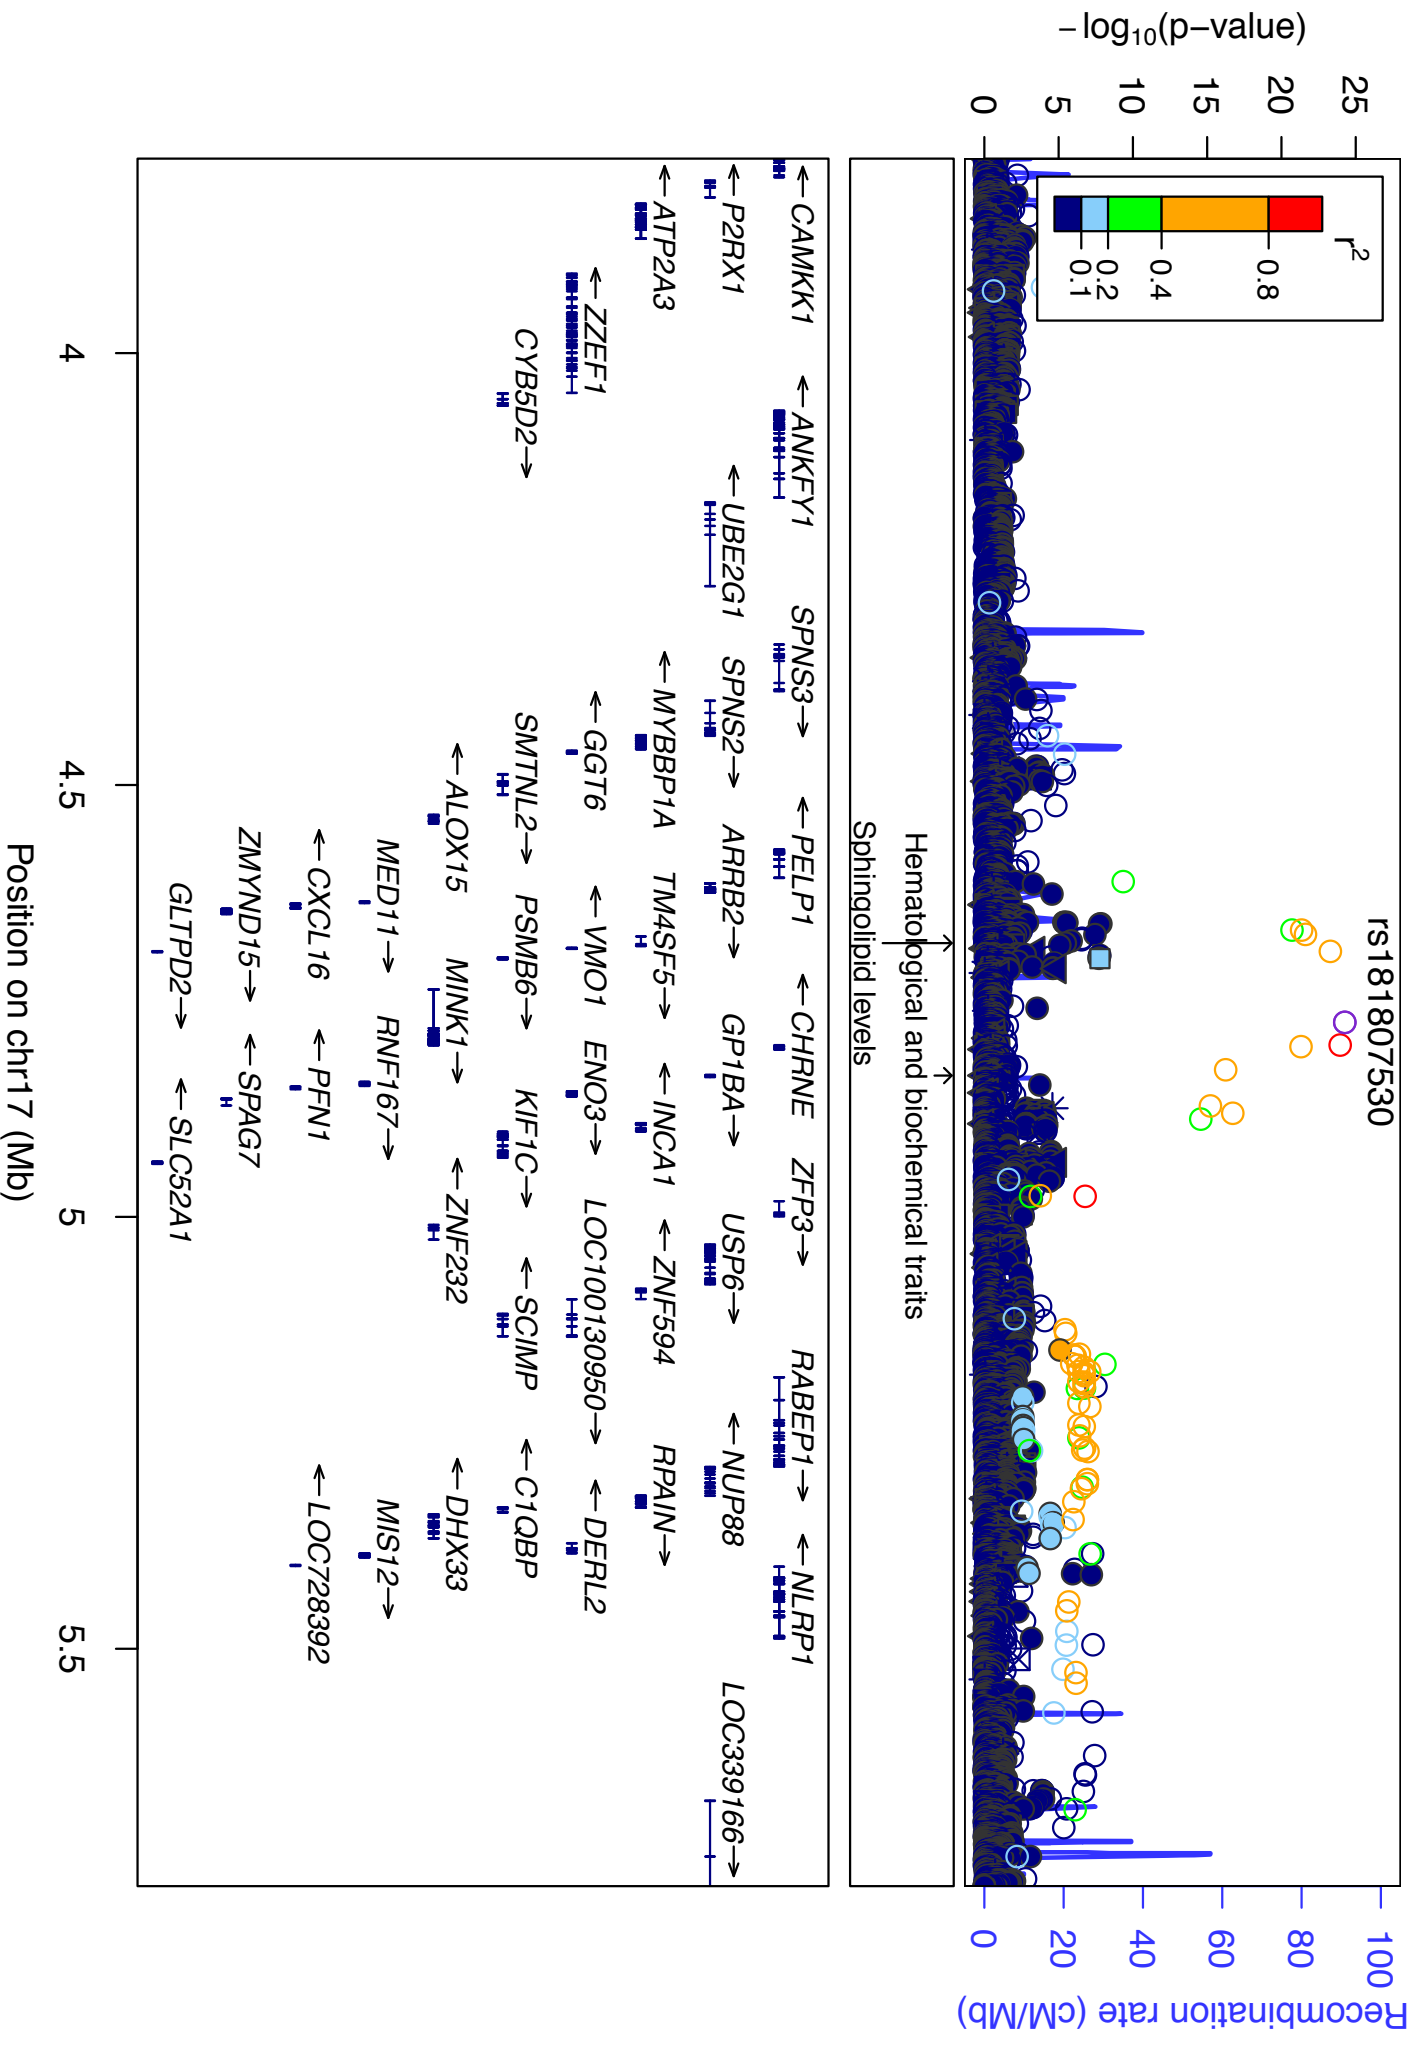

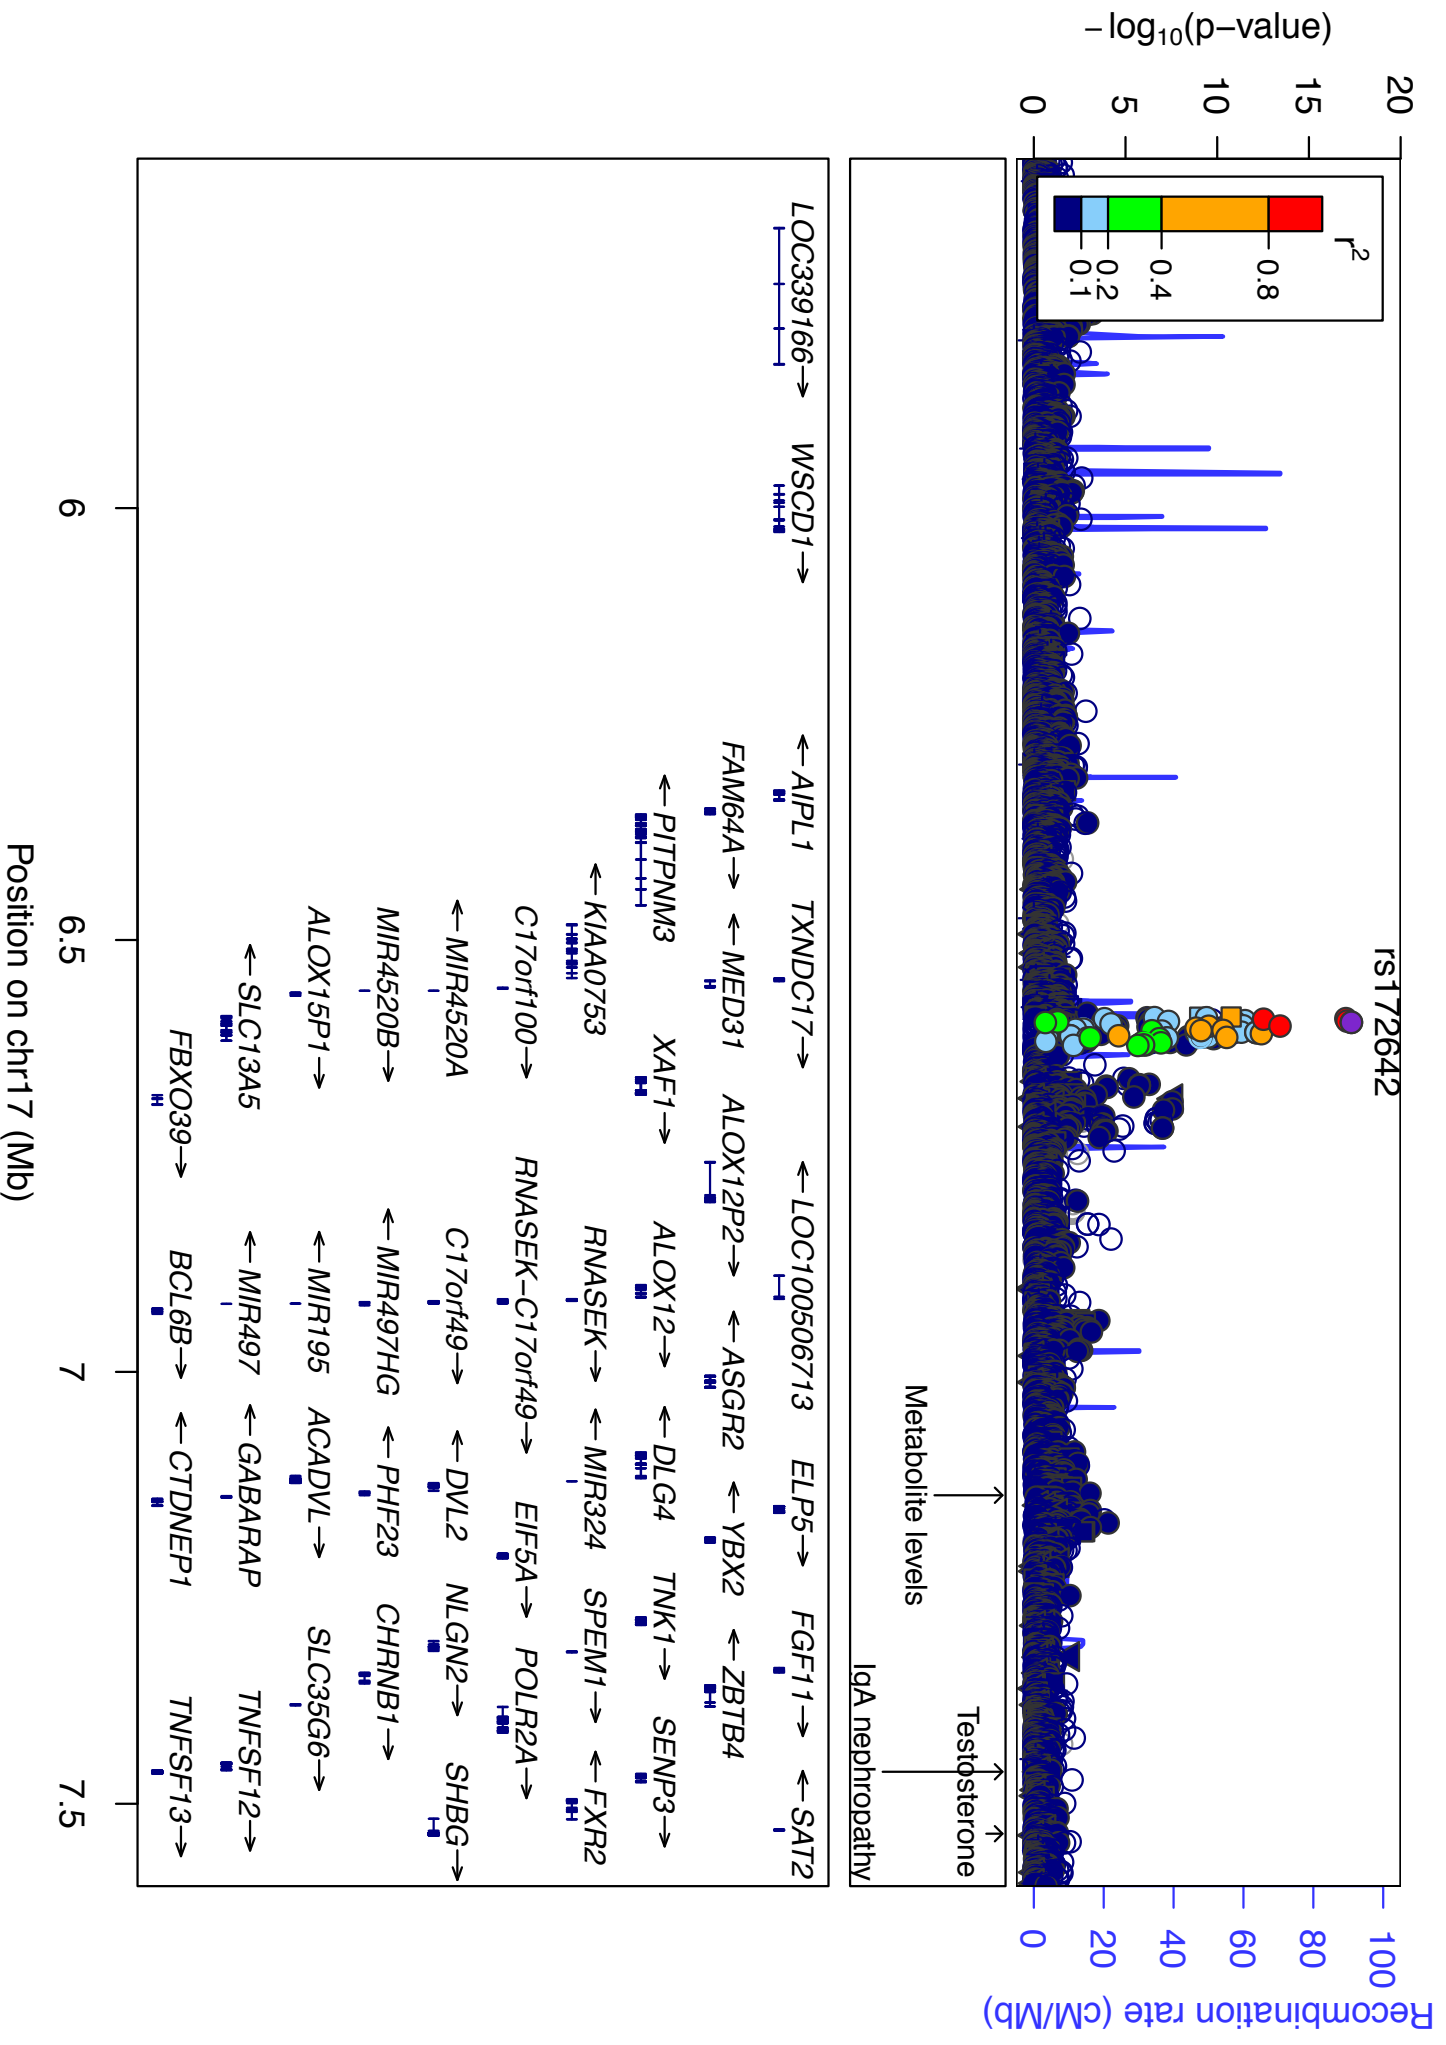

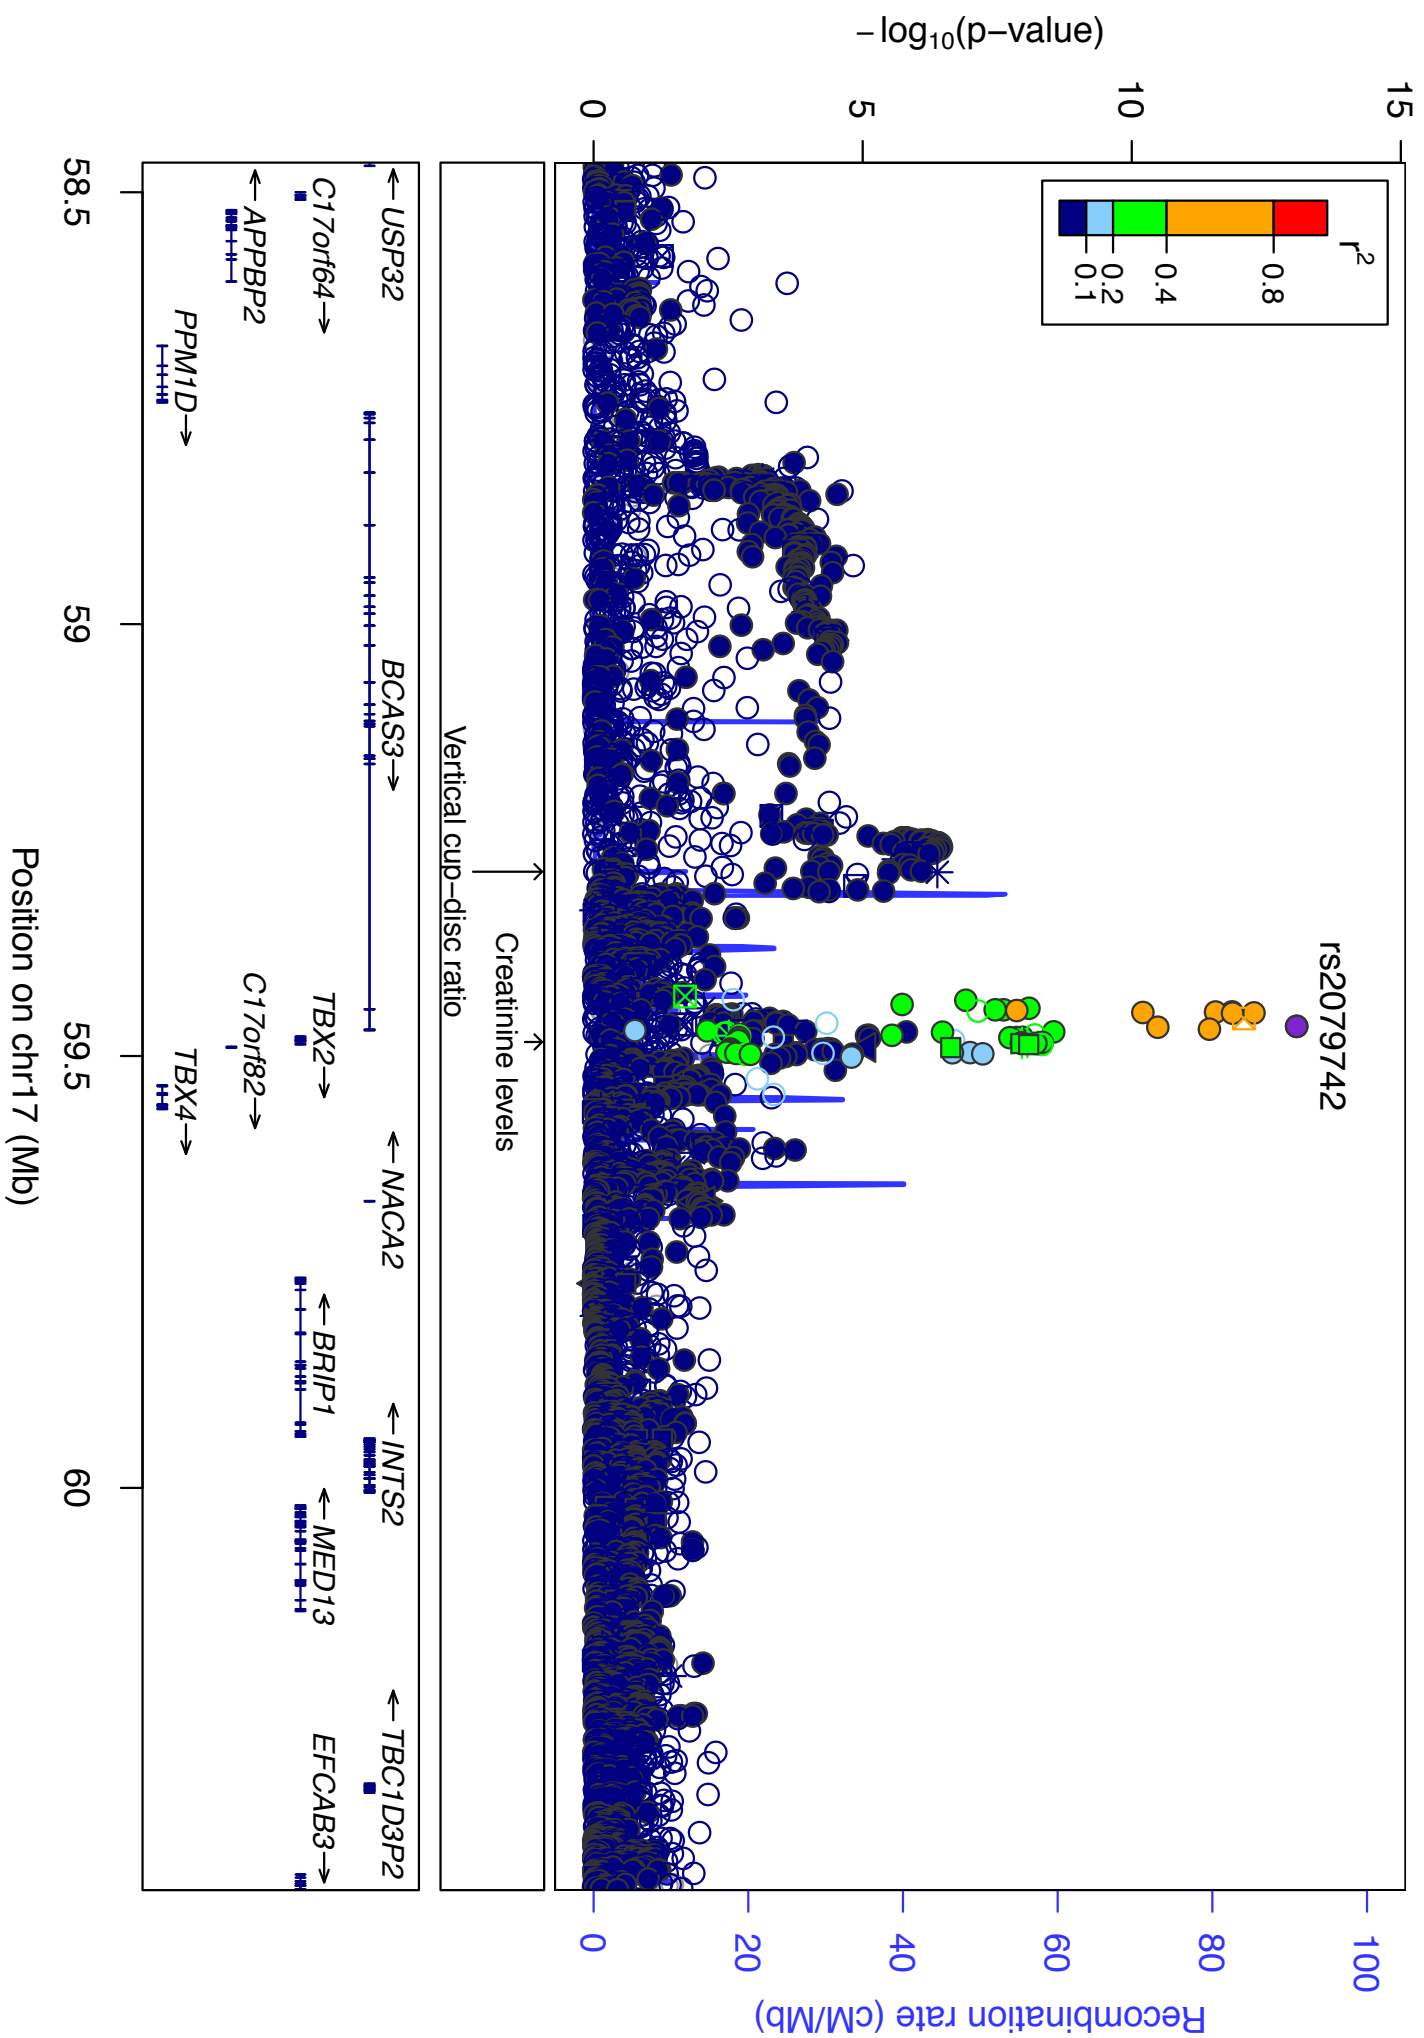

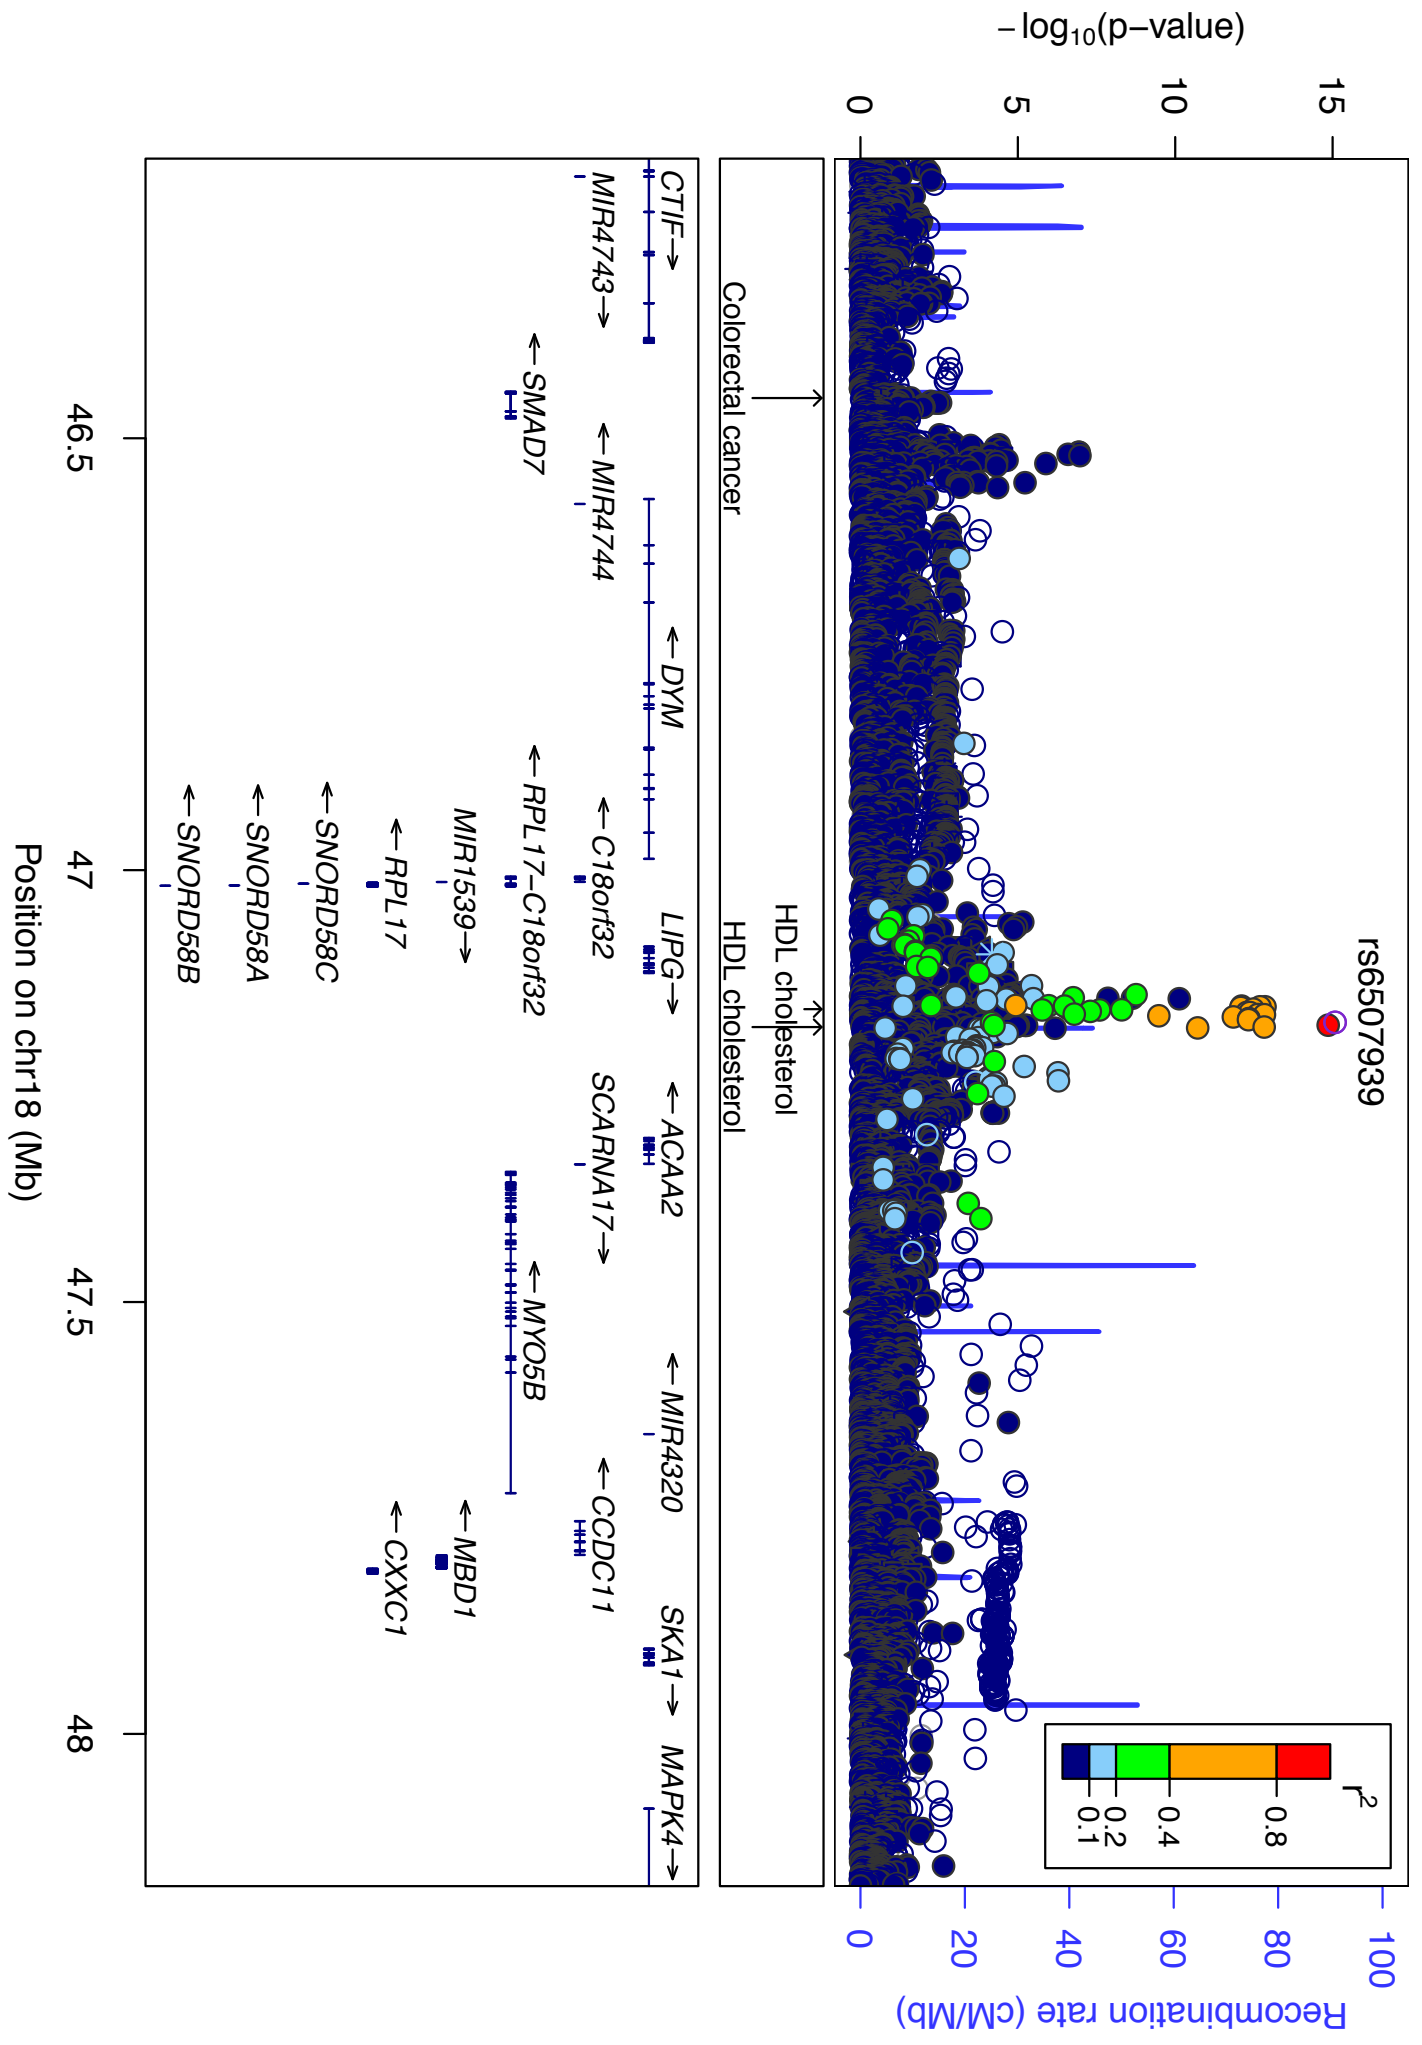



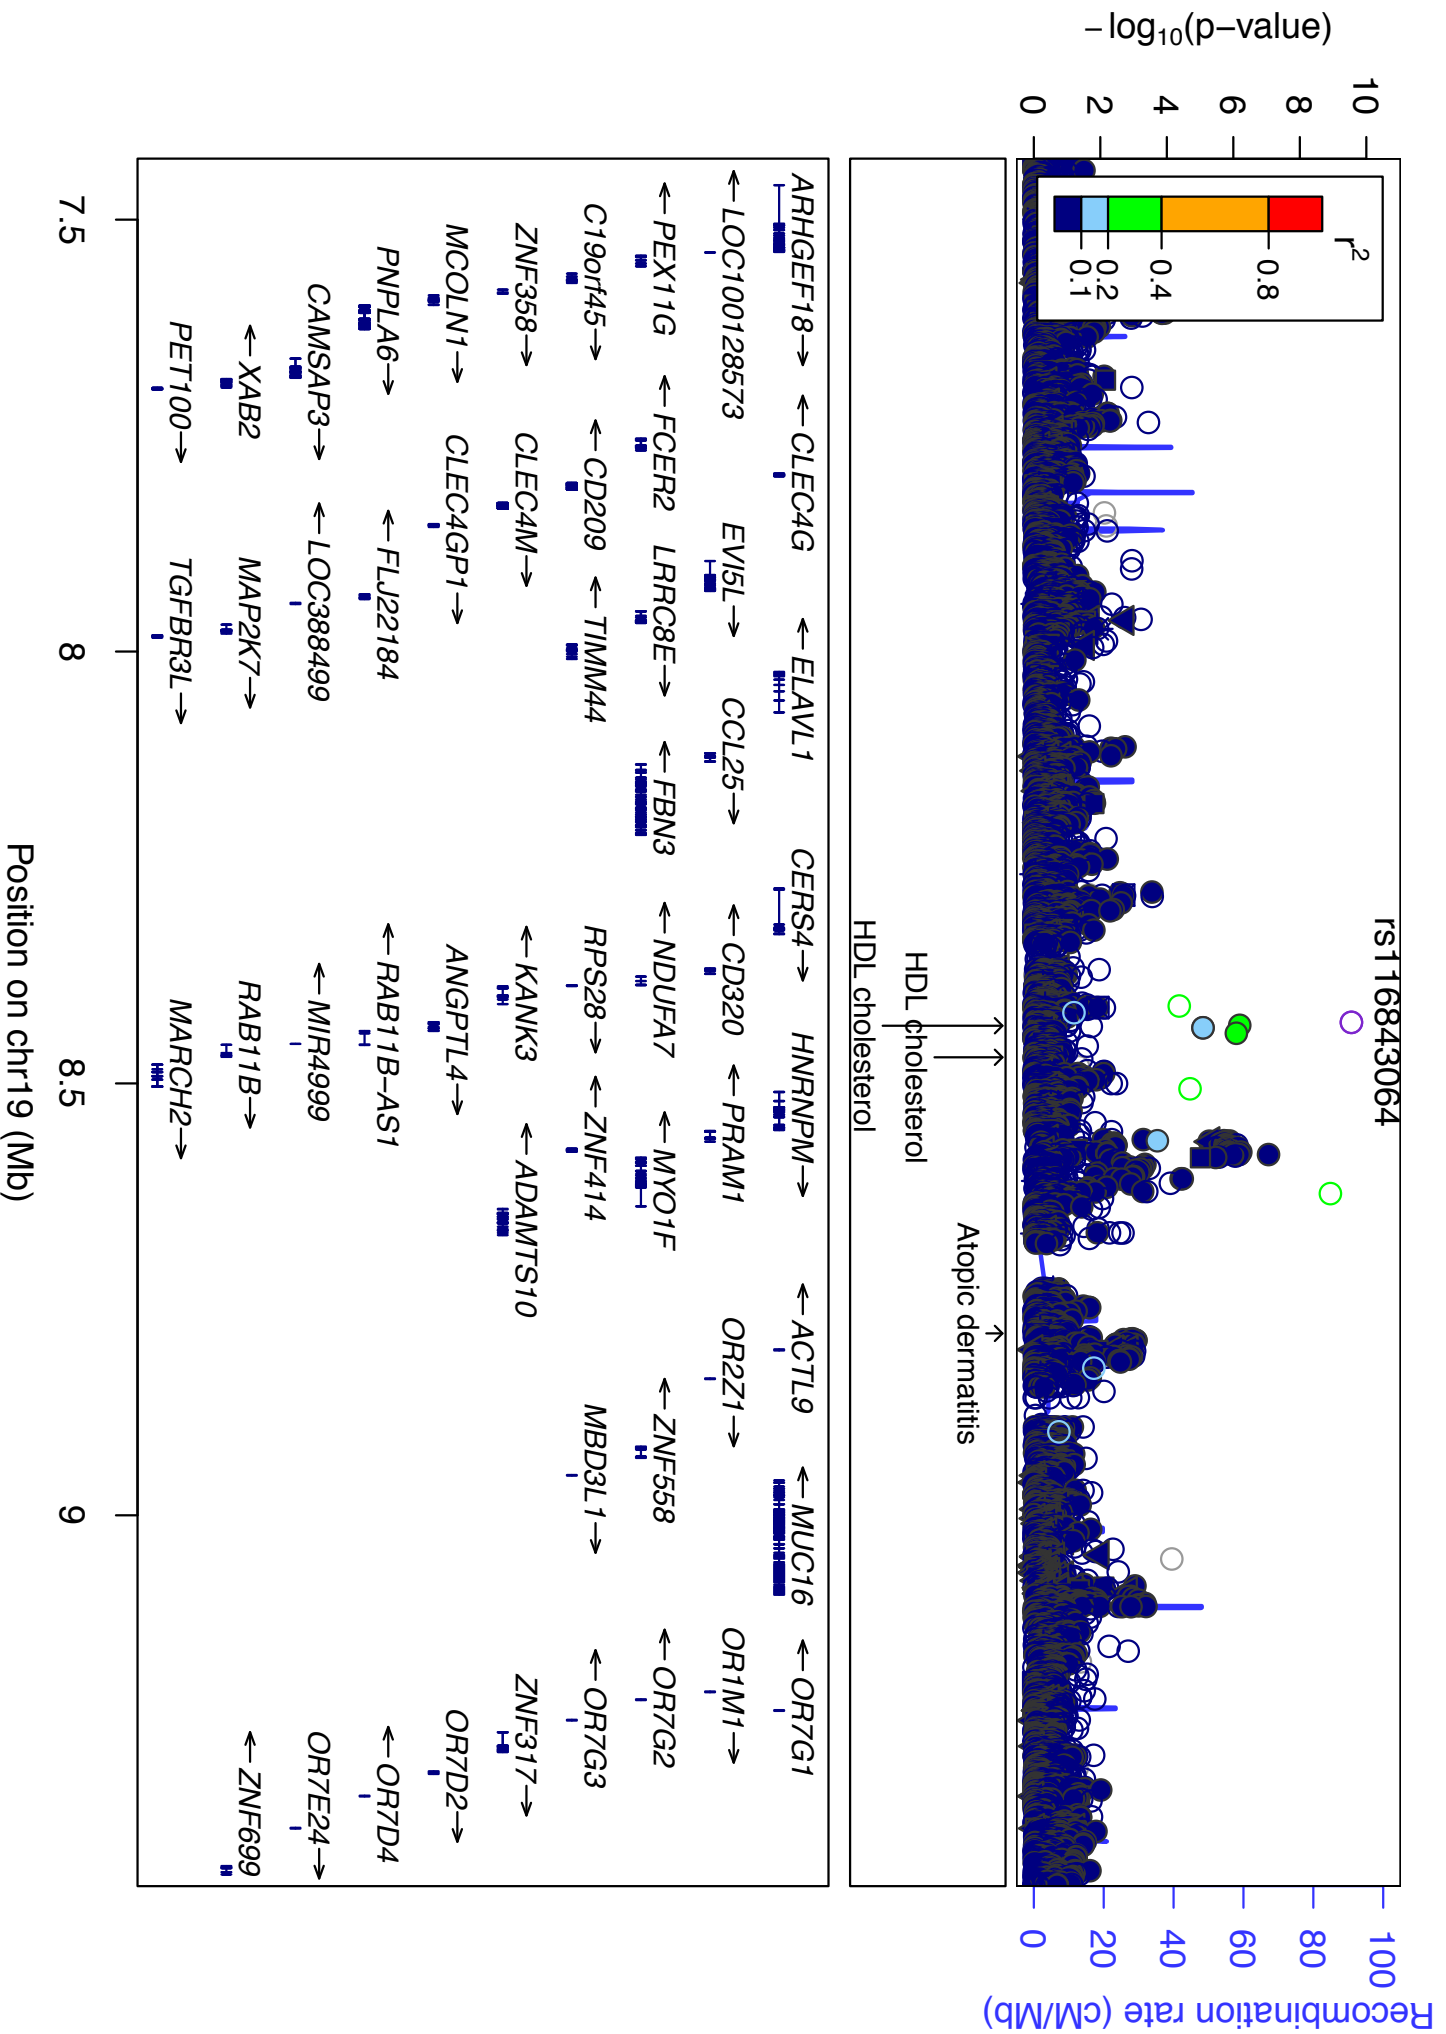

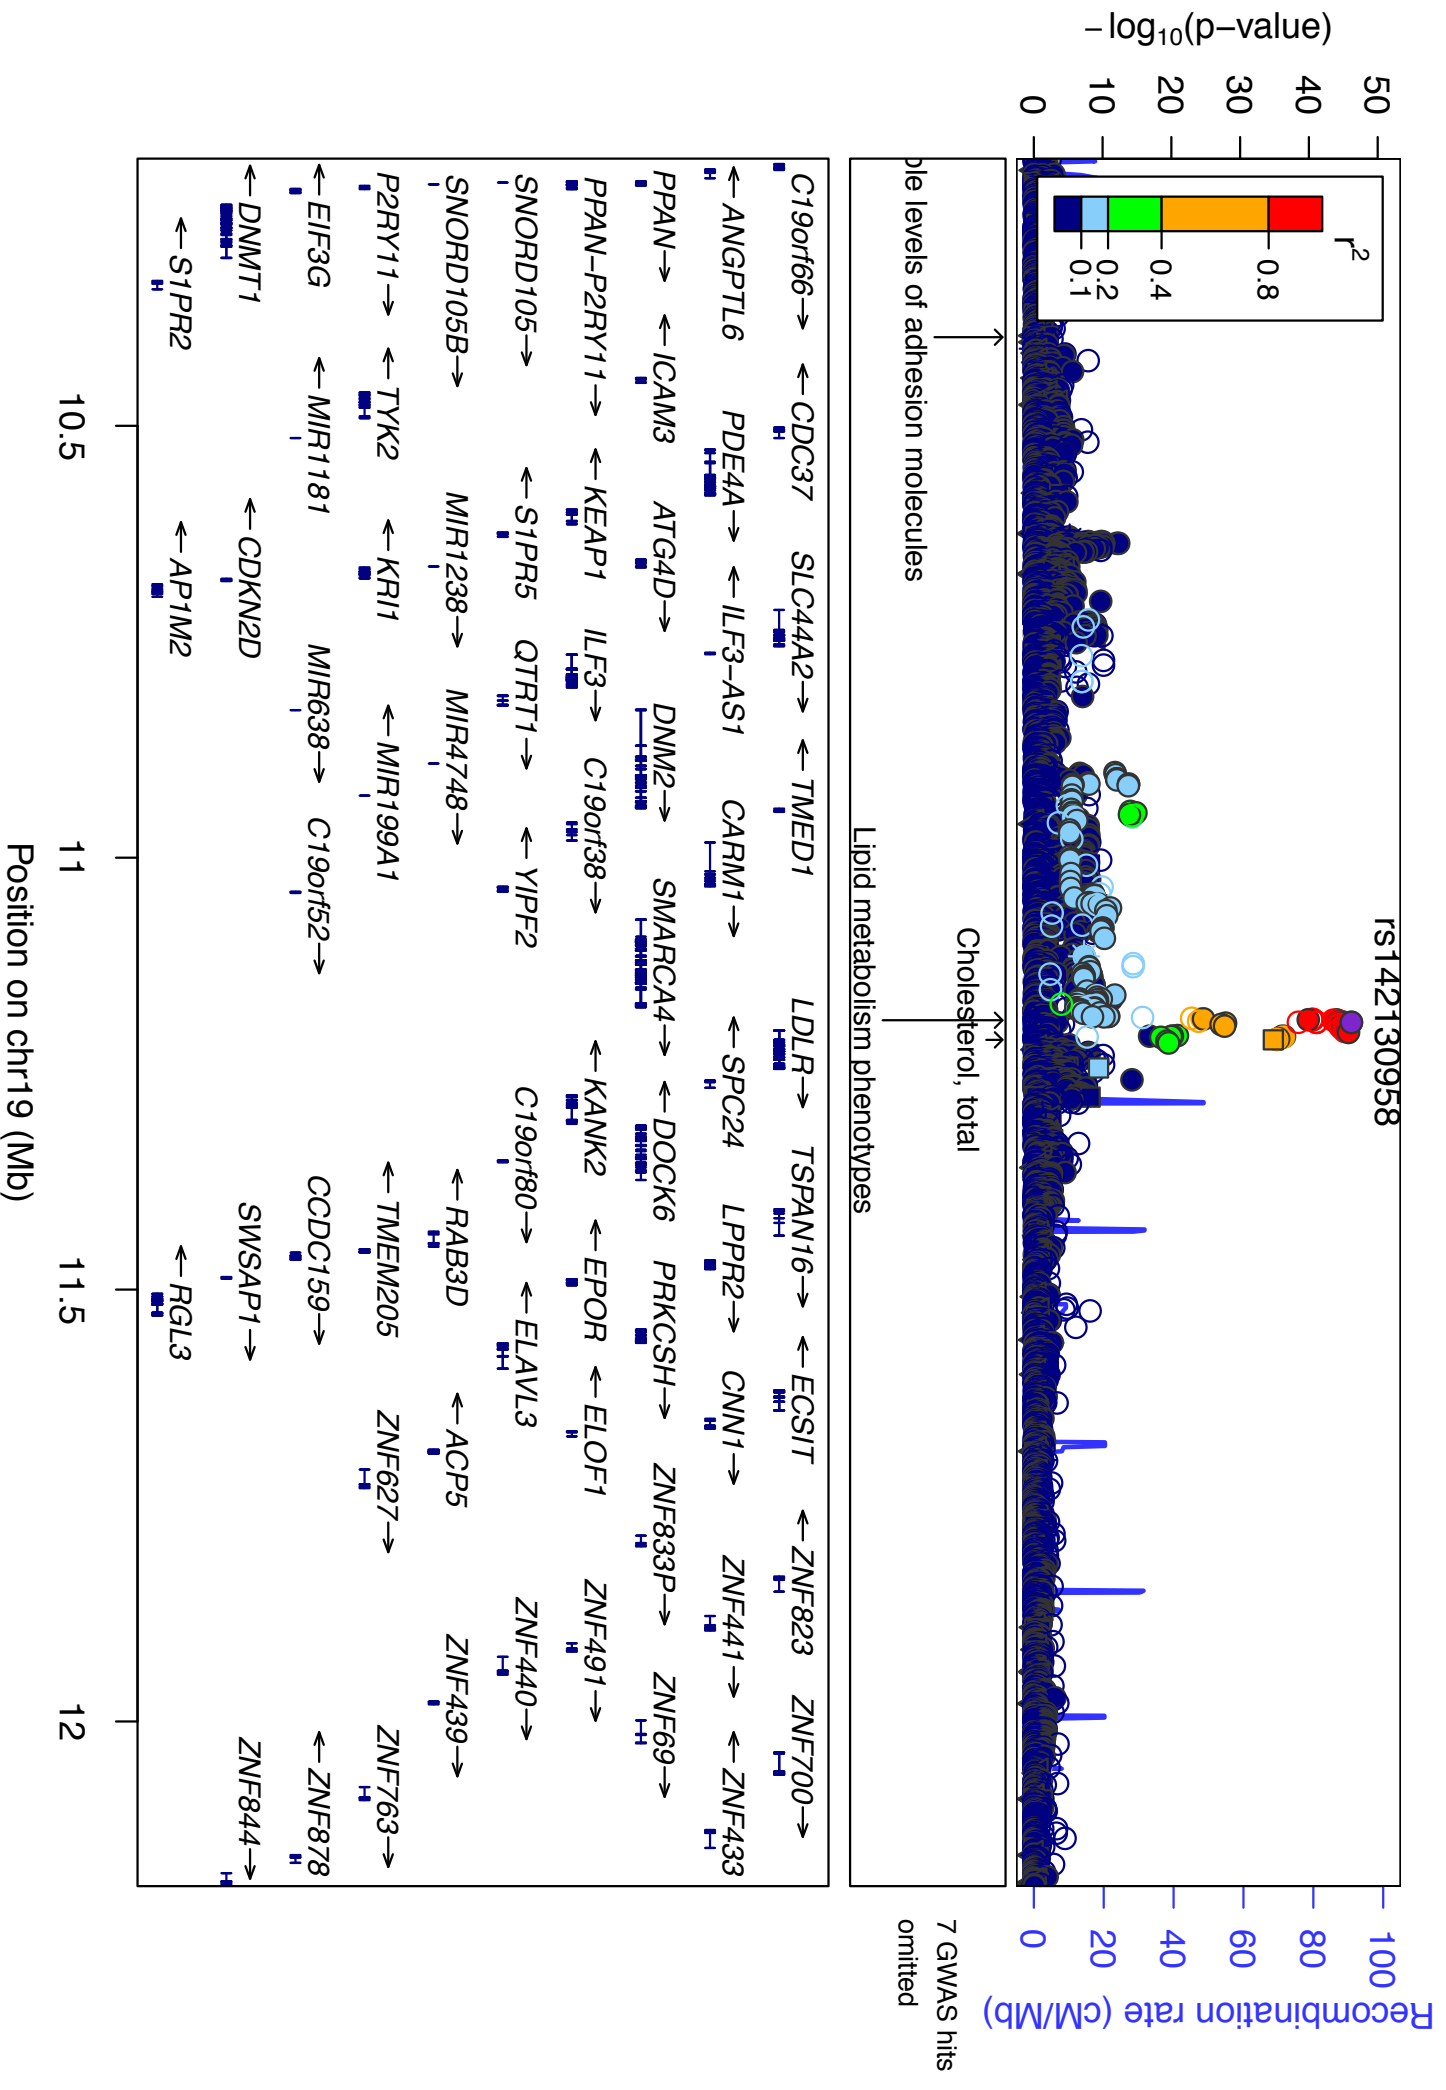

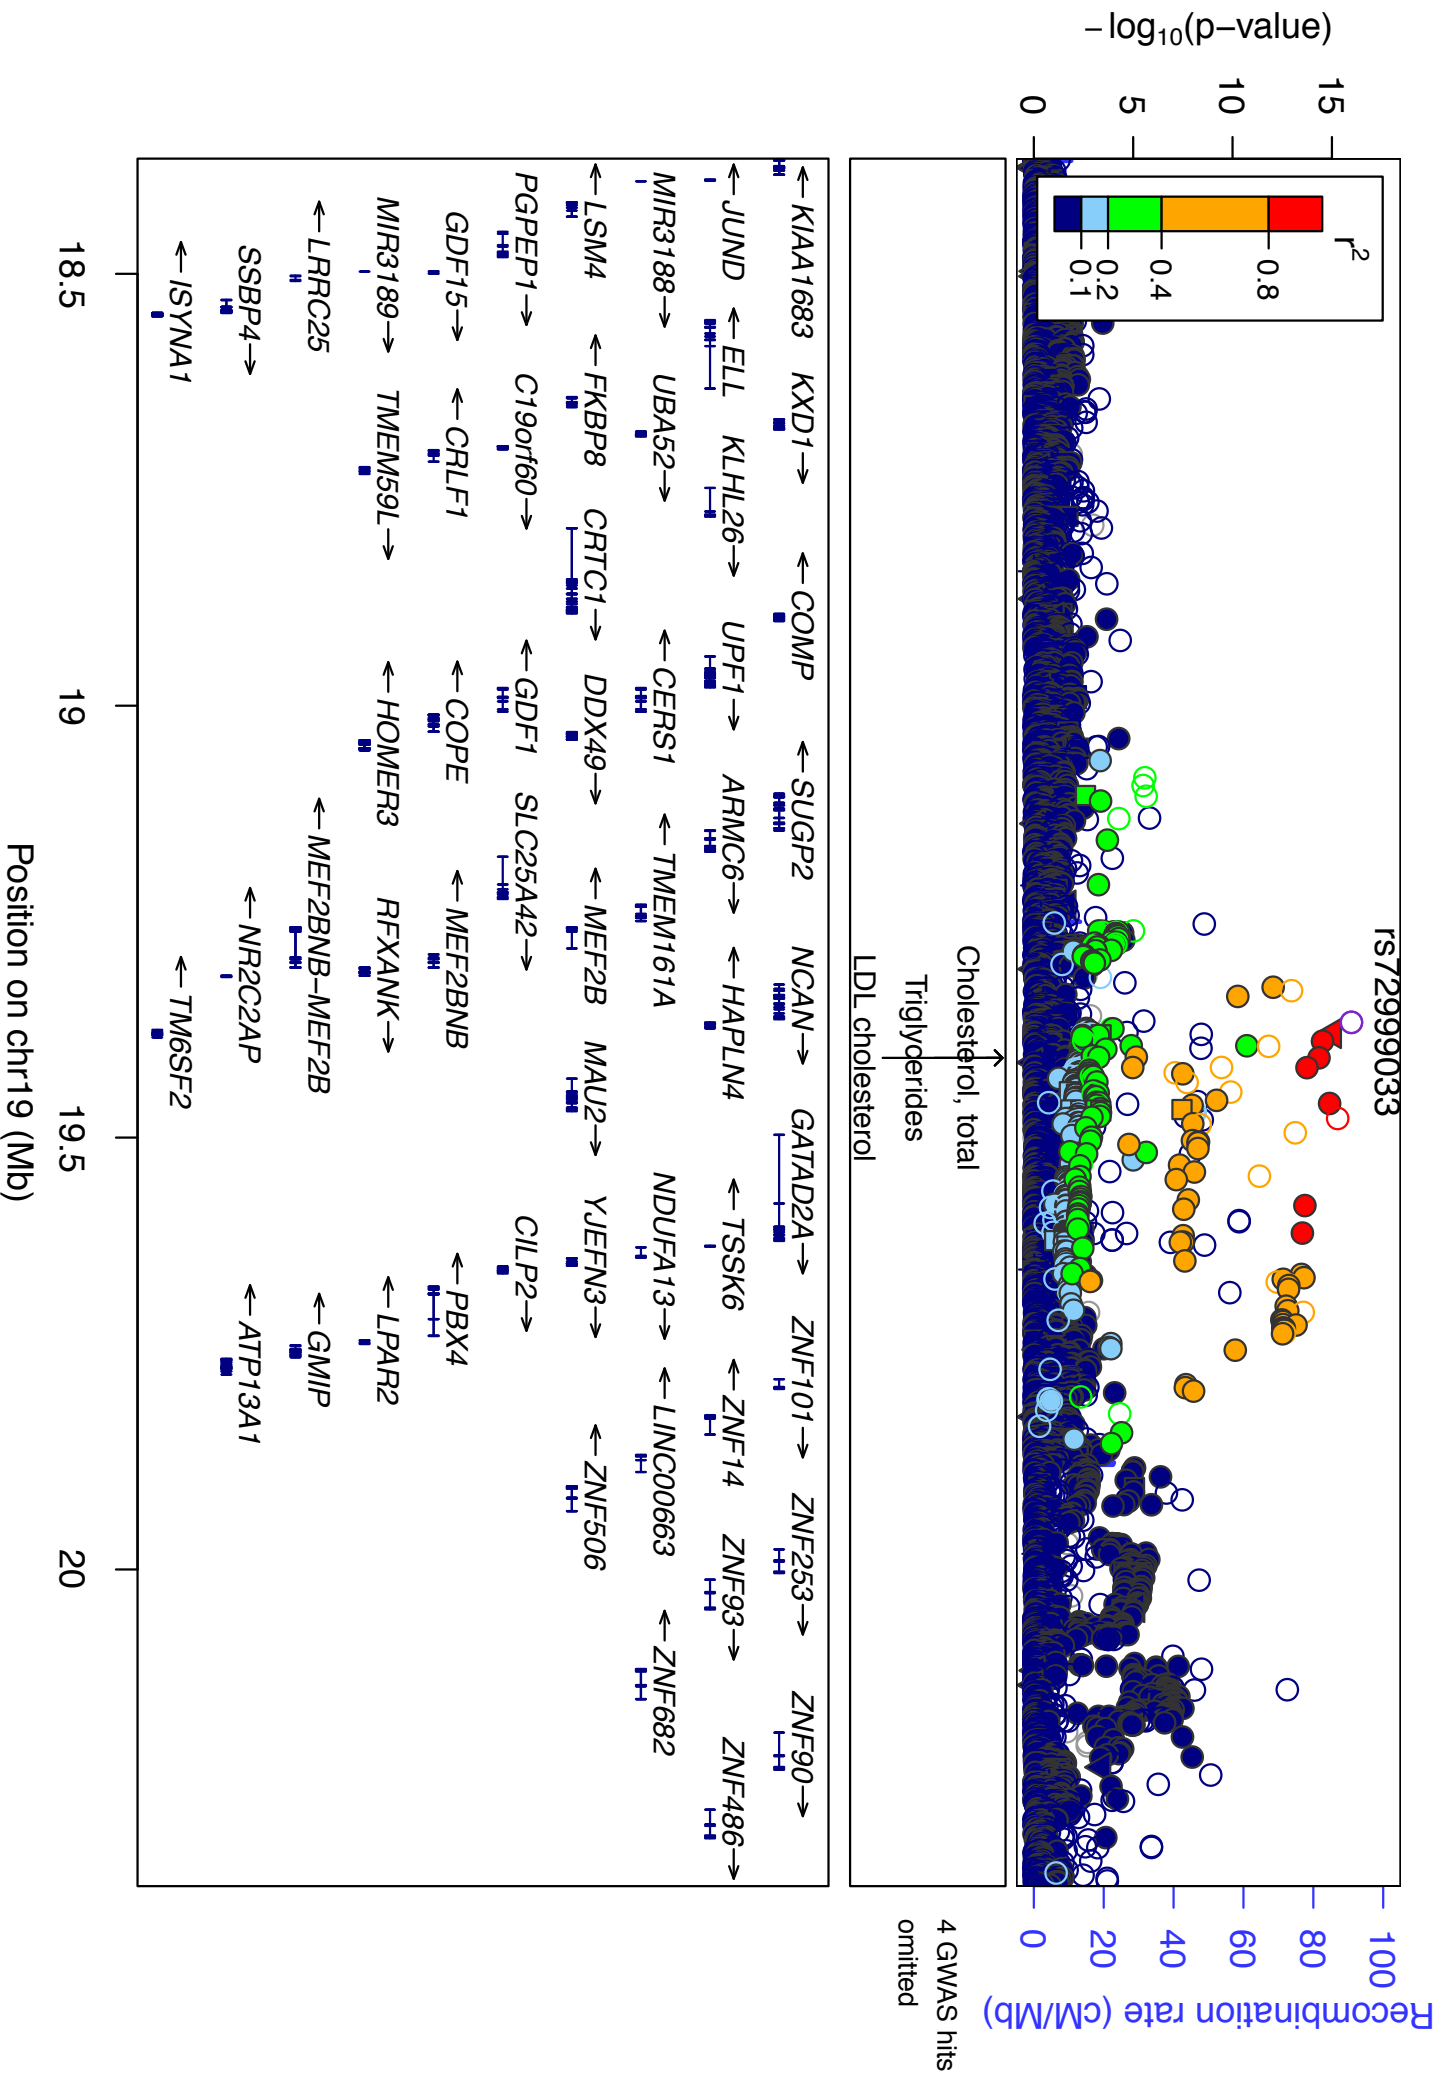

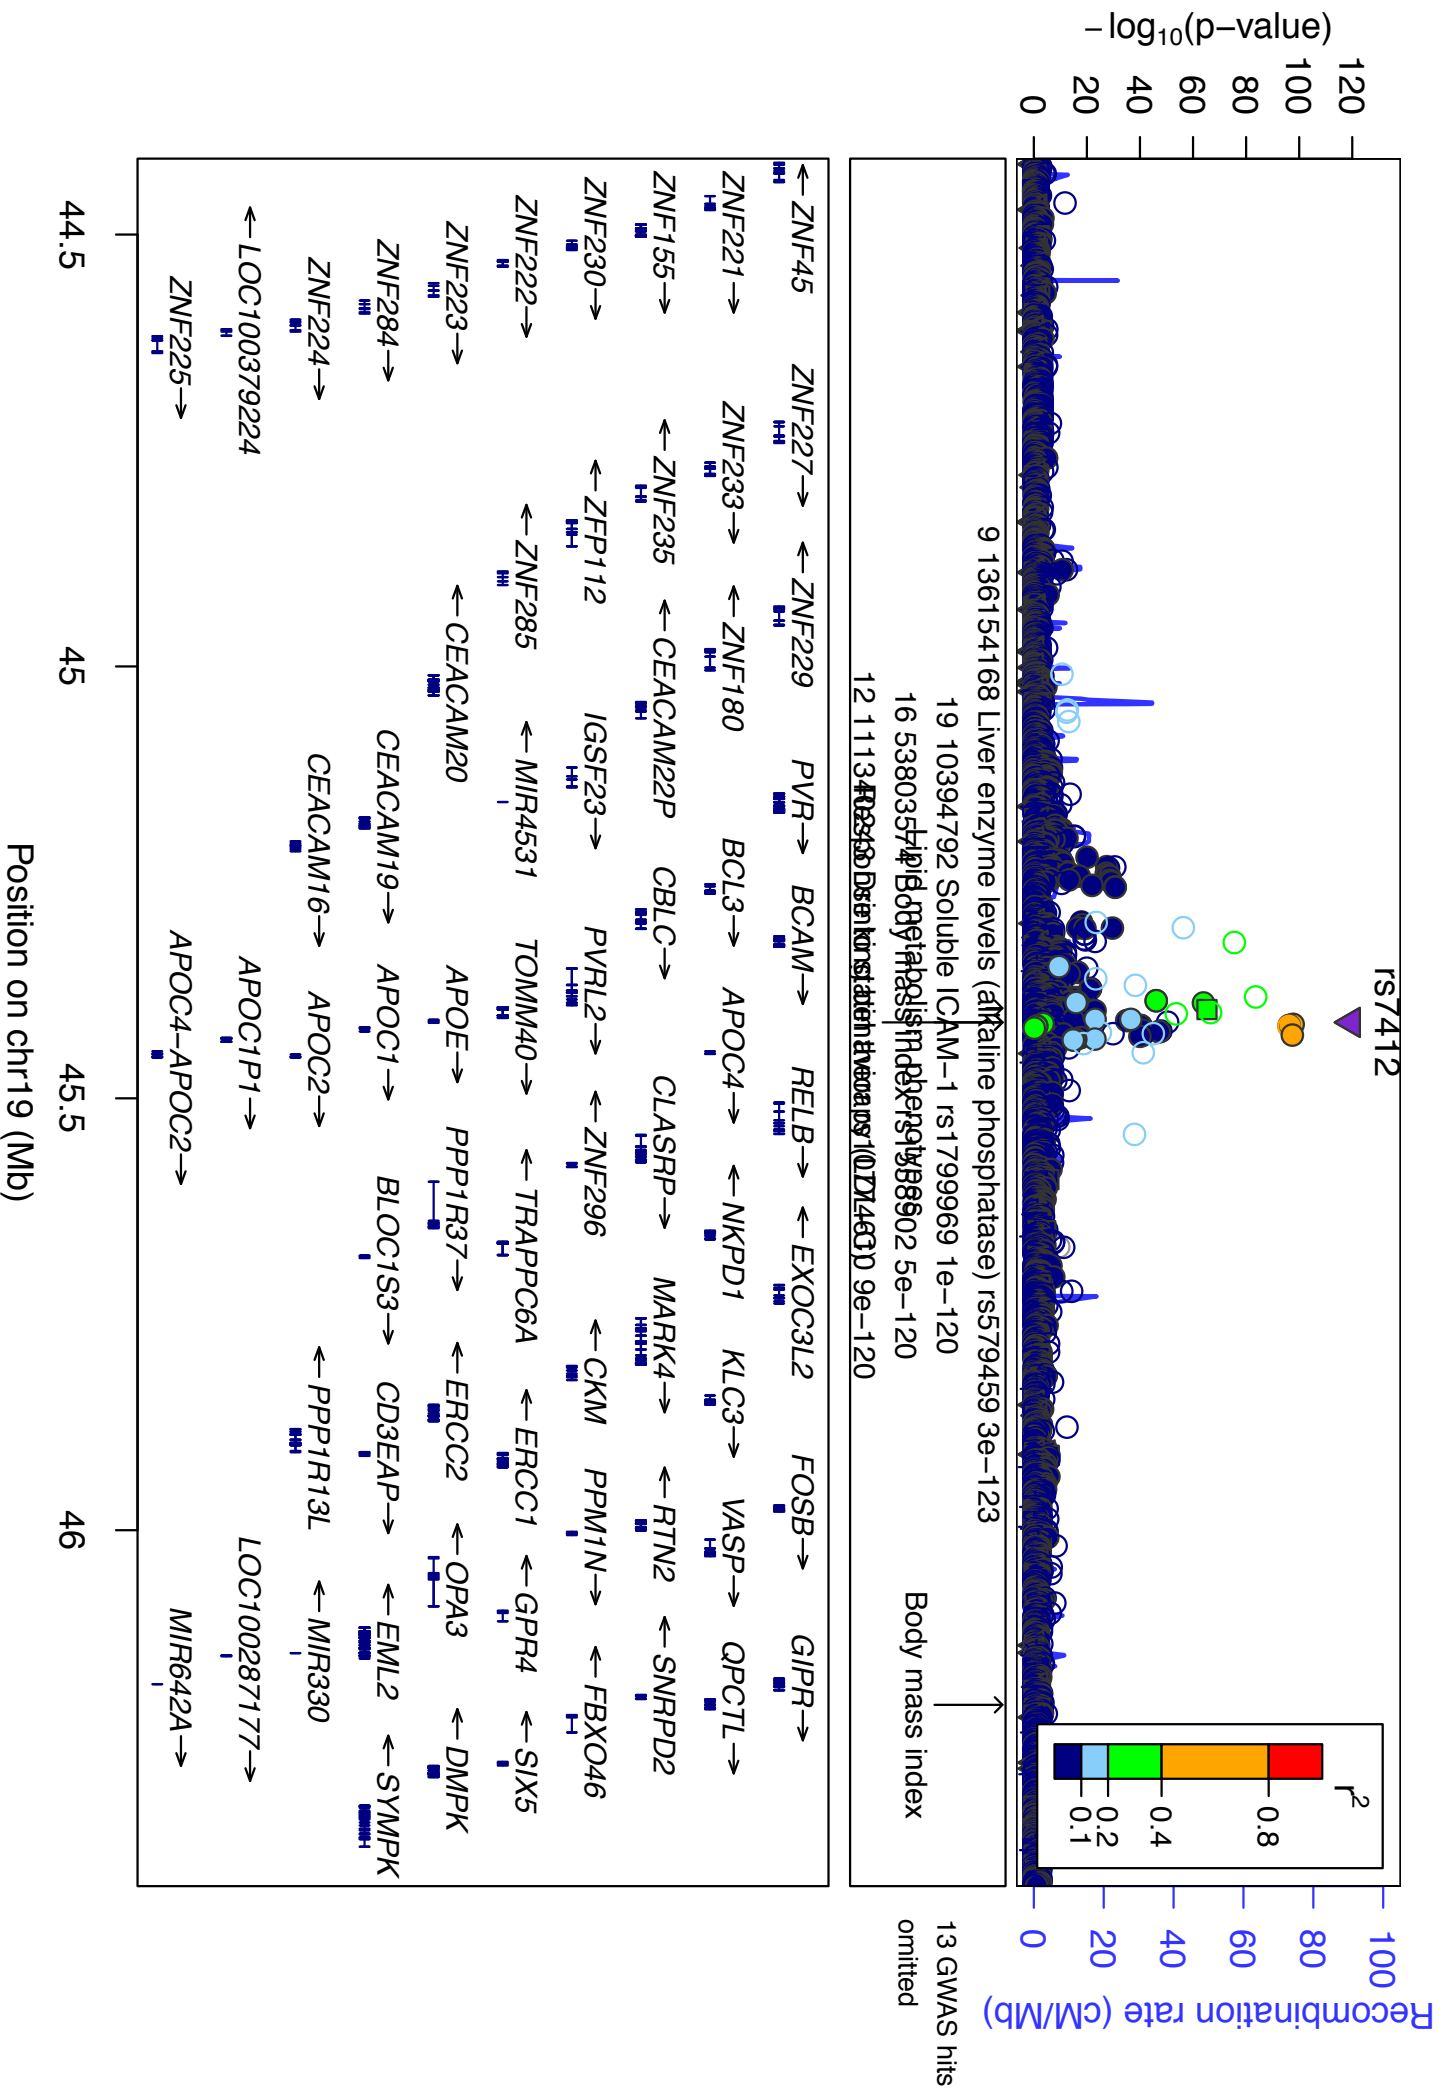

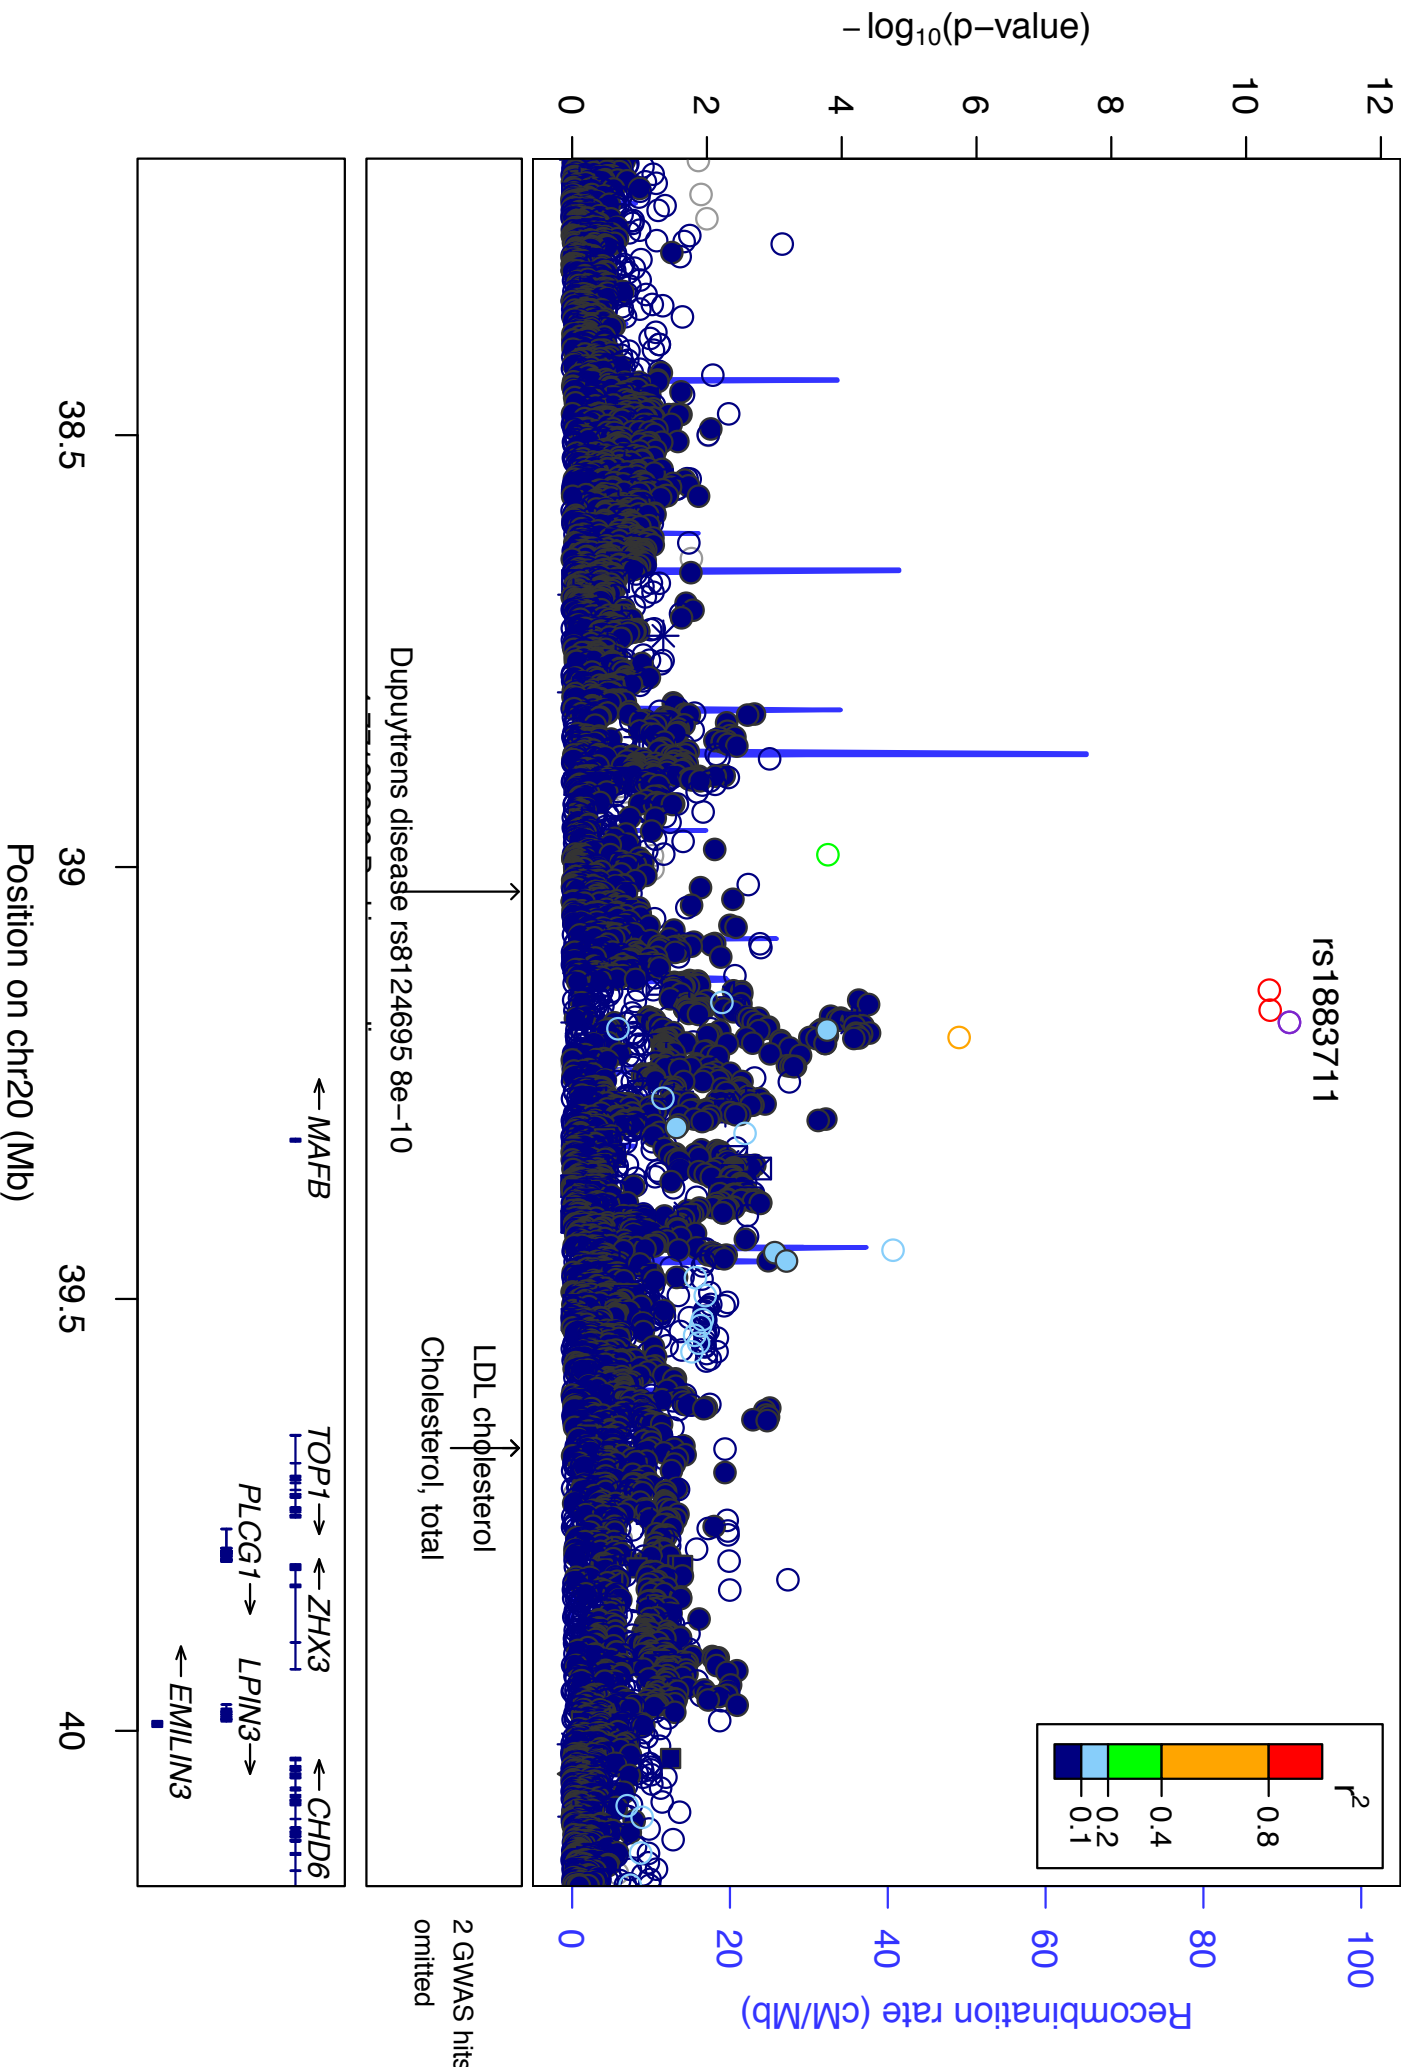

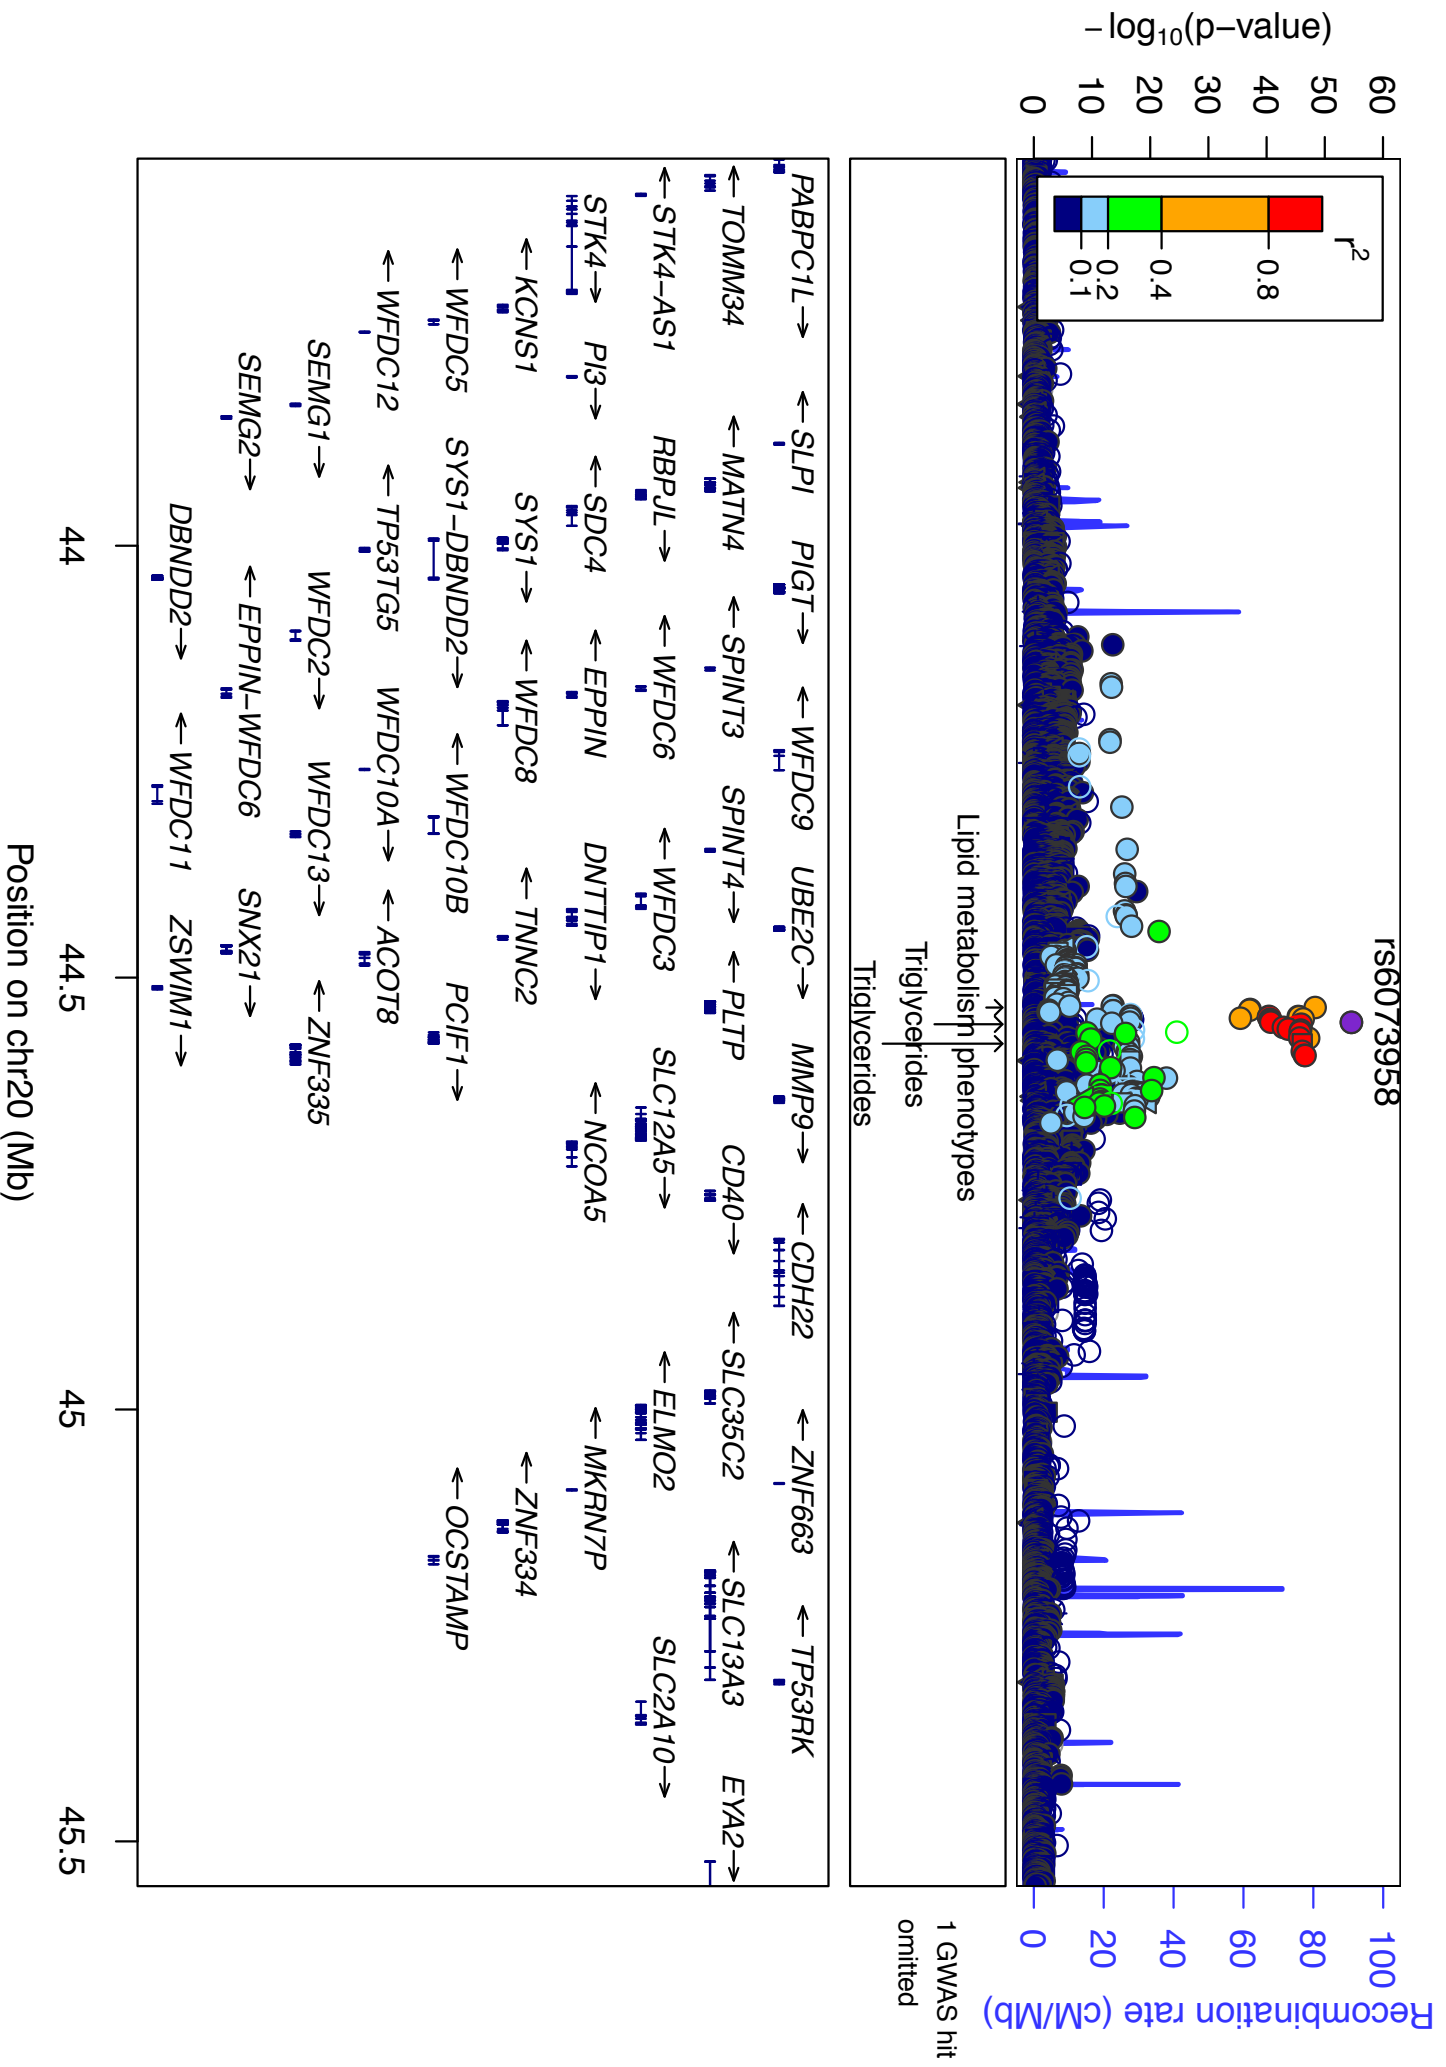



Supplementary Figure 2. Forest plots of individual cohort and meta-analysis association results for all lead SNP associations in **Table 2** and **Supplementary Table 4**.



### SNP rs191448950, Chr 1, Pos 55584844, L.LDL.FC

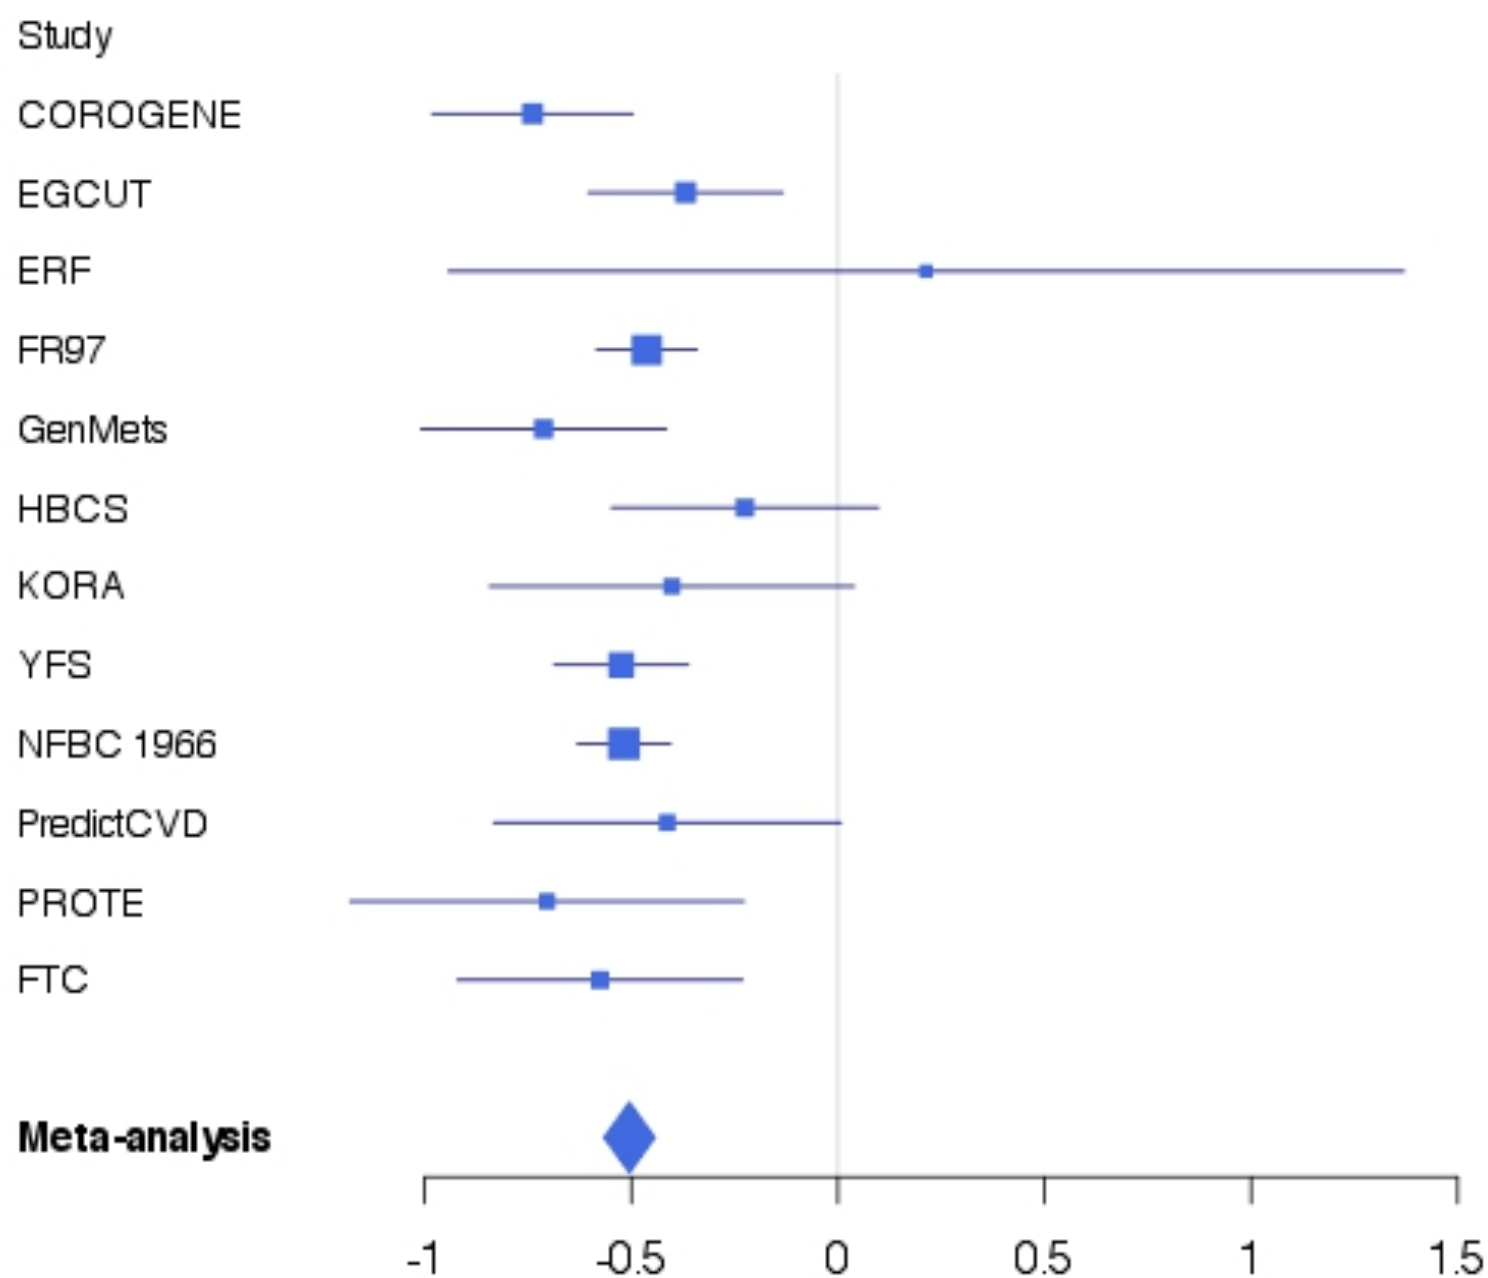

### SNP rs1168041, Chr 1, Pos 62960250, Serum.TG

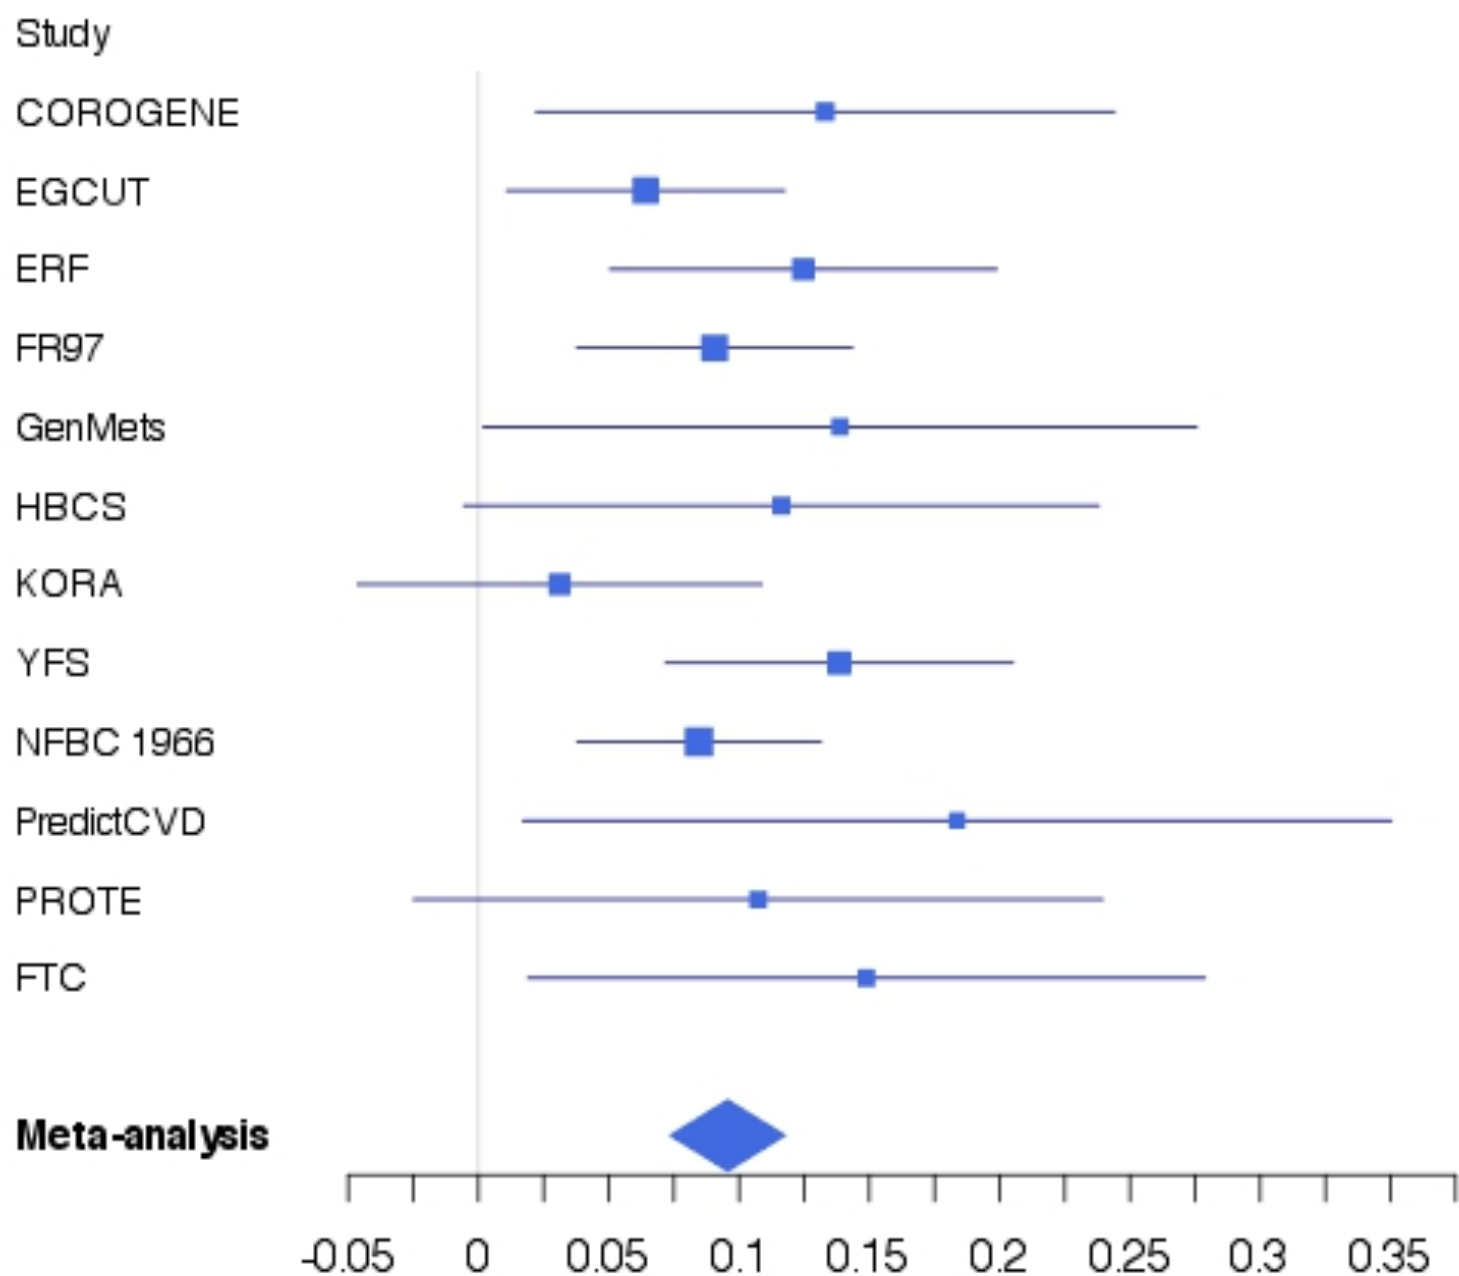

### SNP chr1:109818158:l, Chr 1, Pos 109818158, L.LDL.FC

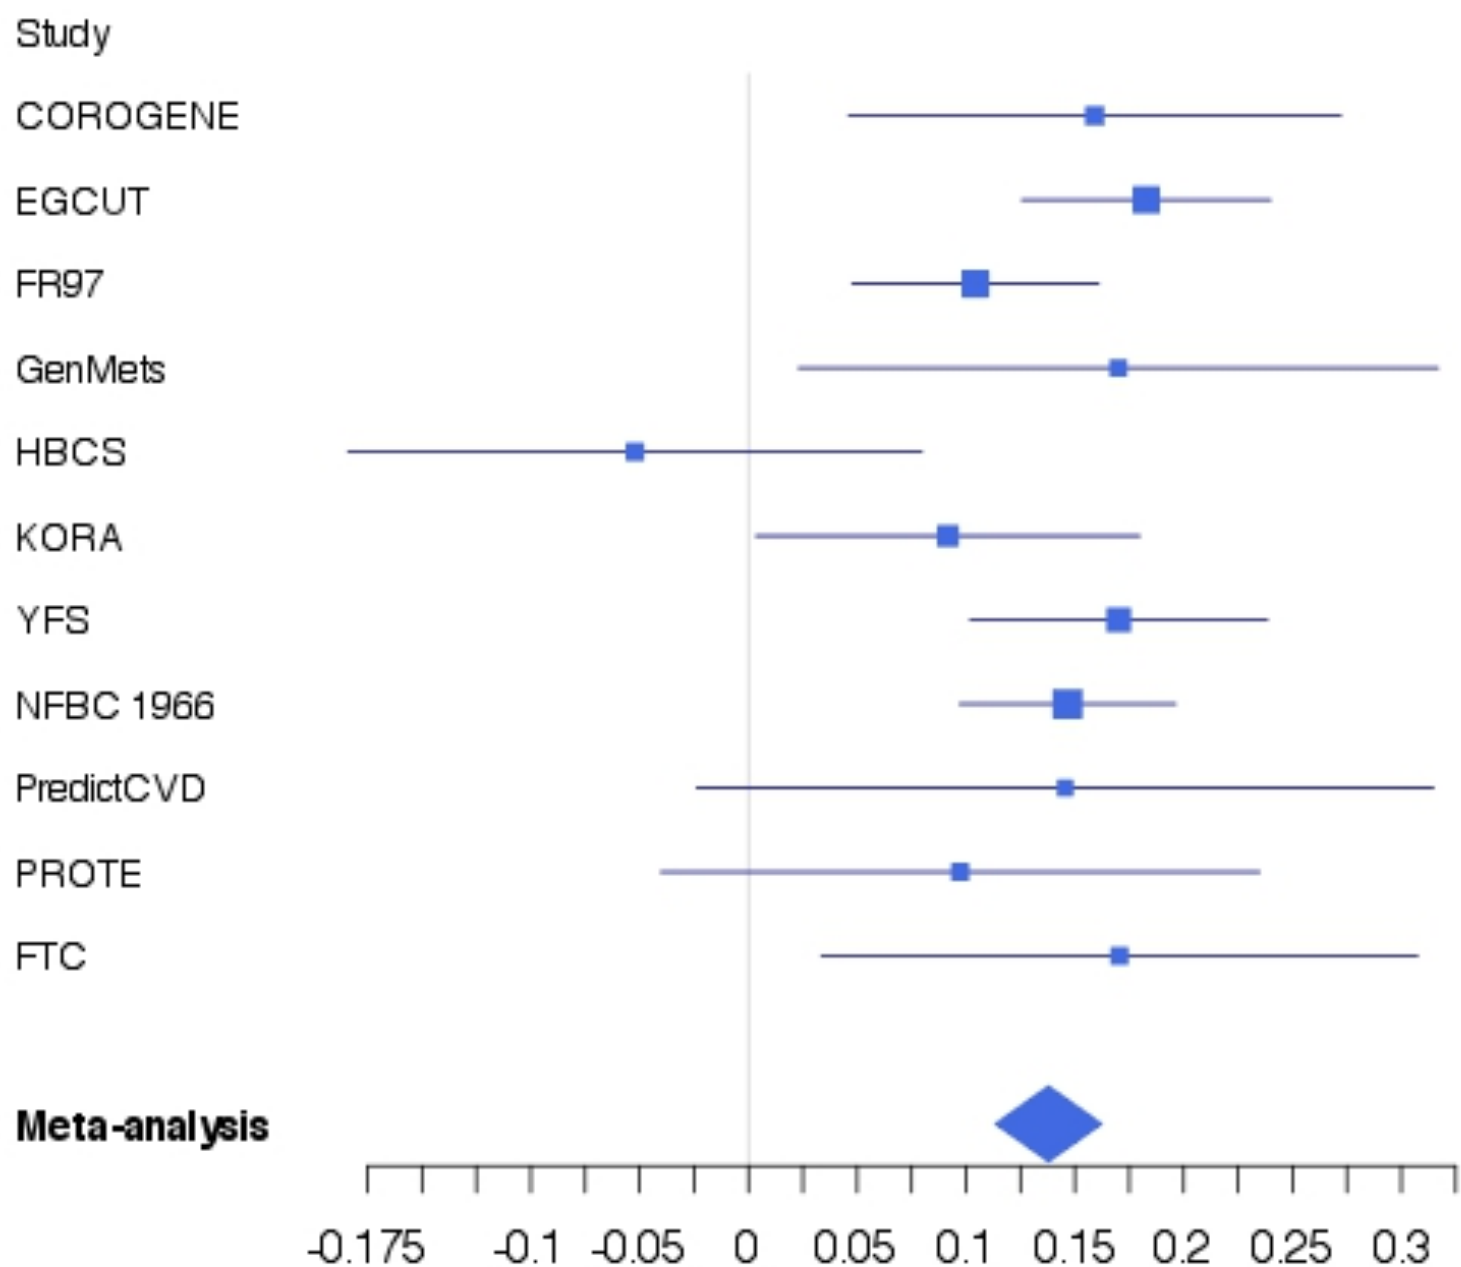

### SNP rs4503368, Chr 1, Pos 161190250, XL.HDL.PL

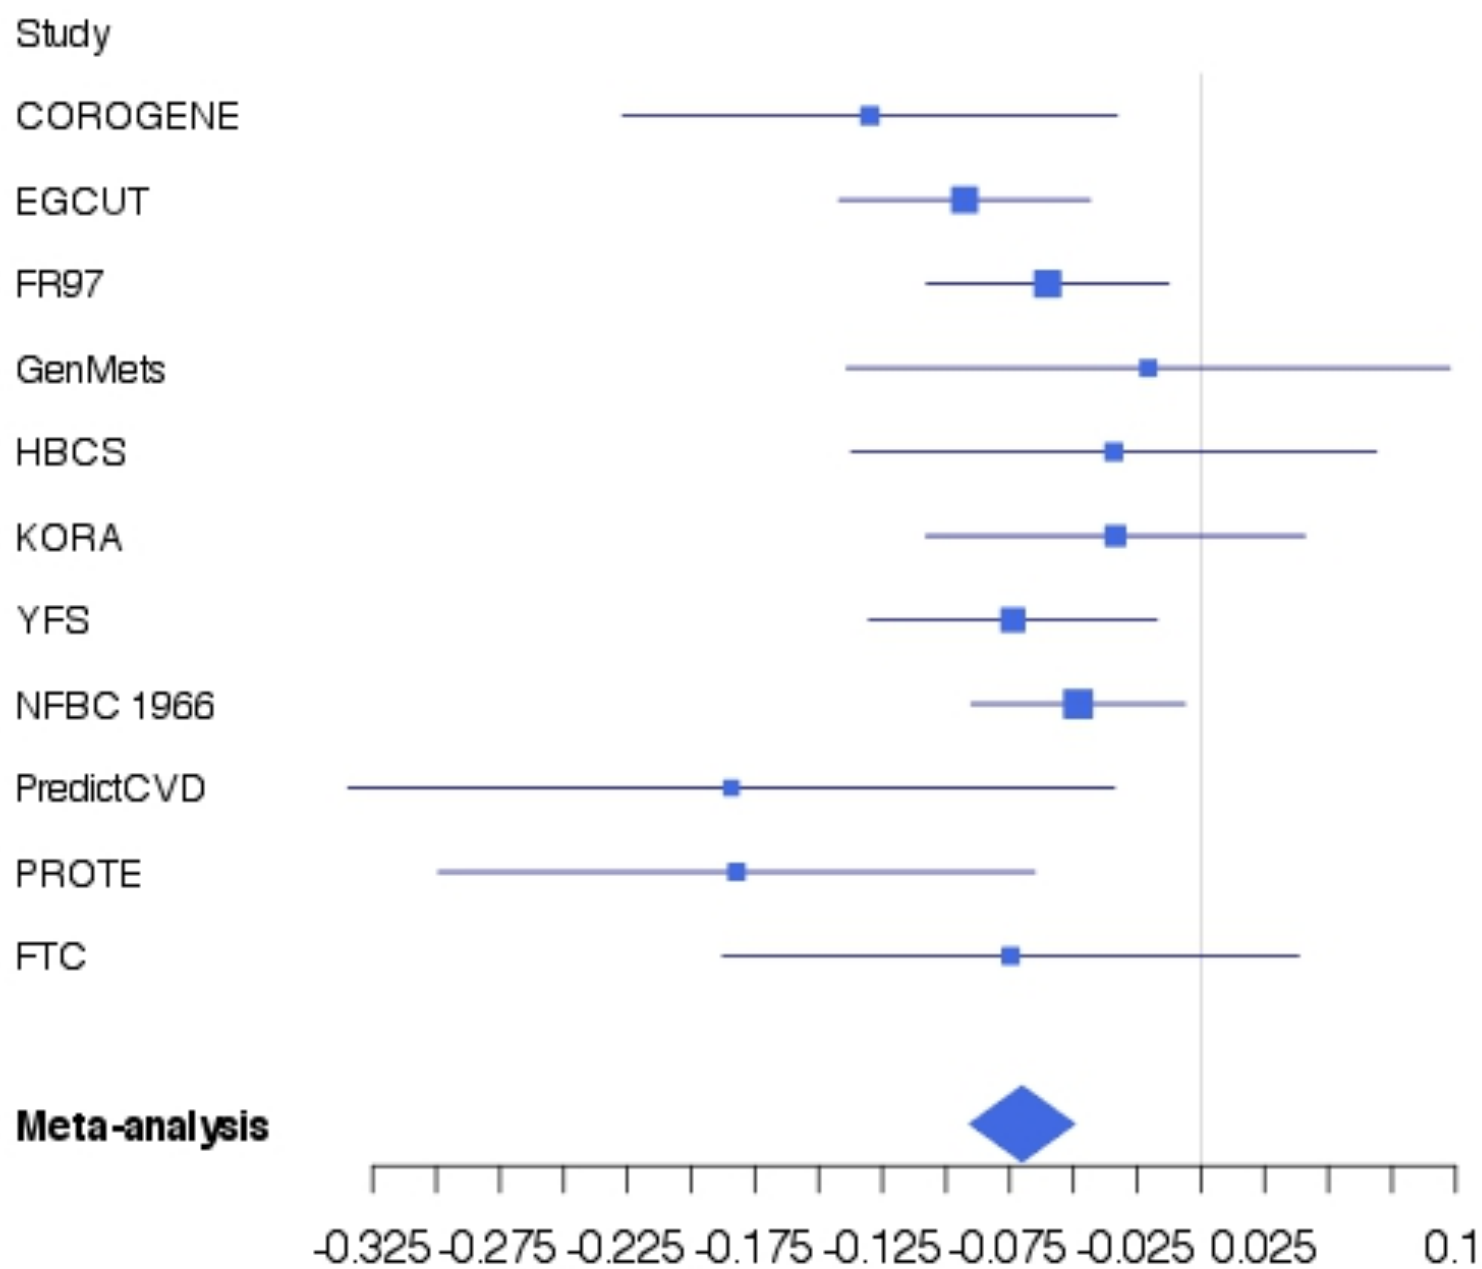

**SNP rs590820, Chr 1, Pos 230309619, M.HDL.FC**

Study

COROGENE

EGCUT

ERF

FR97

GenMets

HBCS

KORA

YFS

NFBC 1966

PredictCVD

PROTE

FTC

**Meta-analysis**

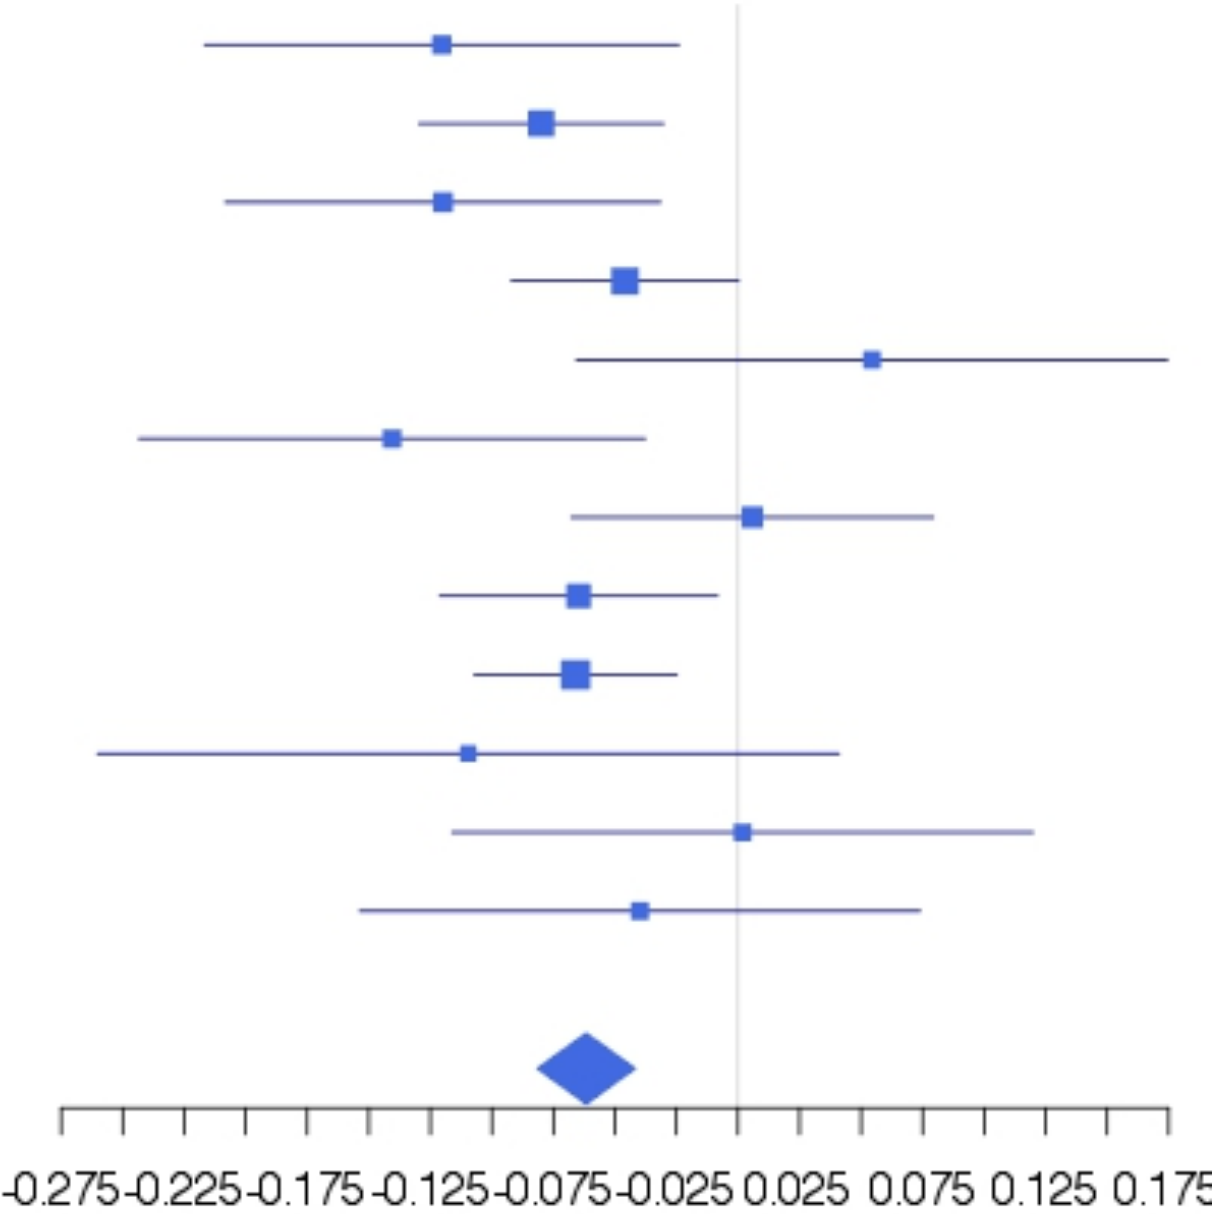

### SNP rs6756629, Chr 2, Pos 44065090, LDL.C

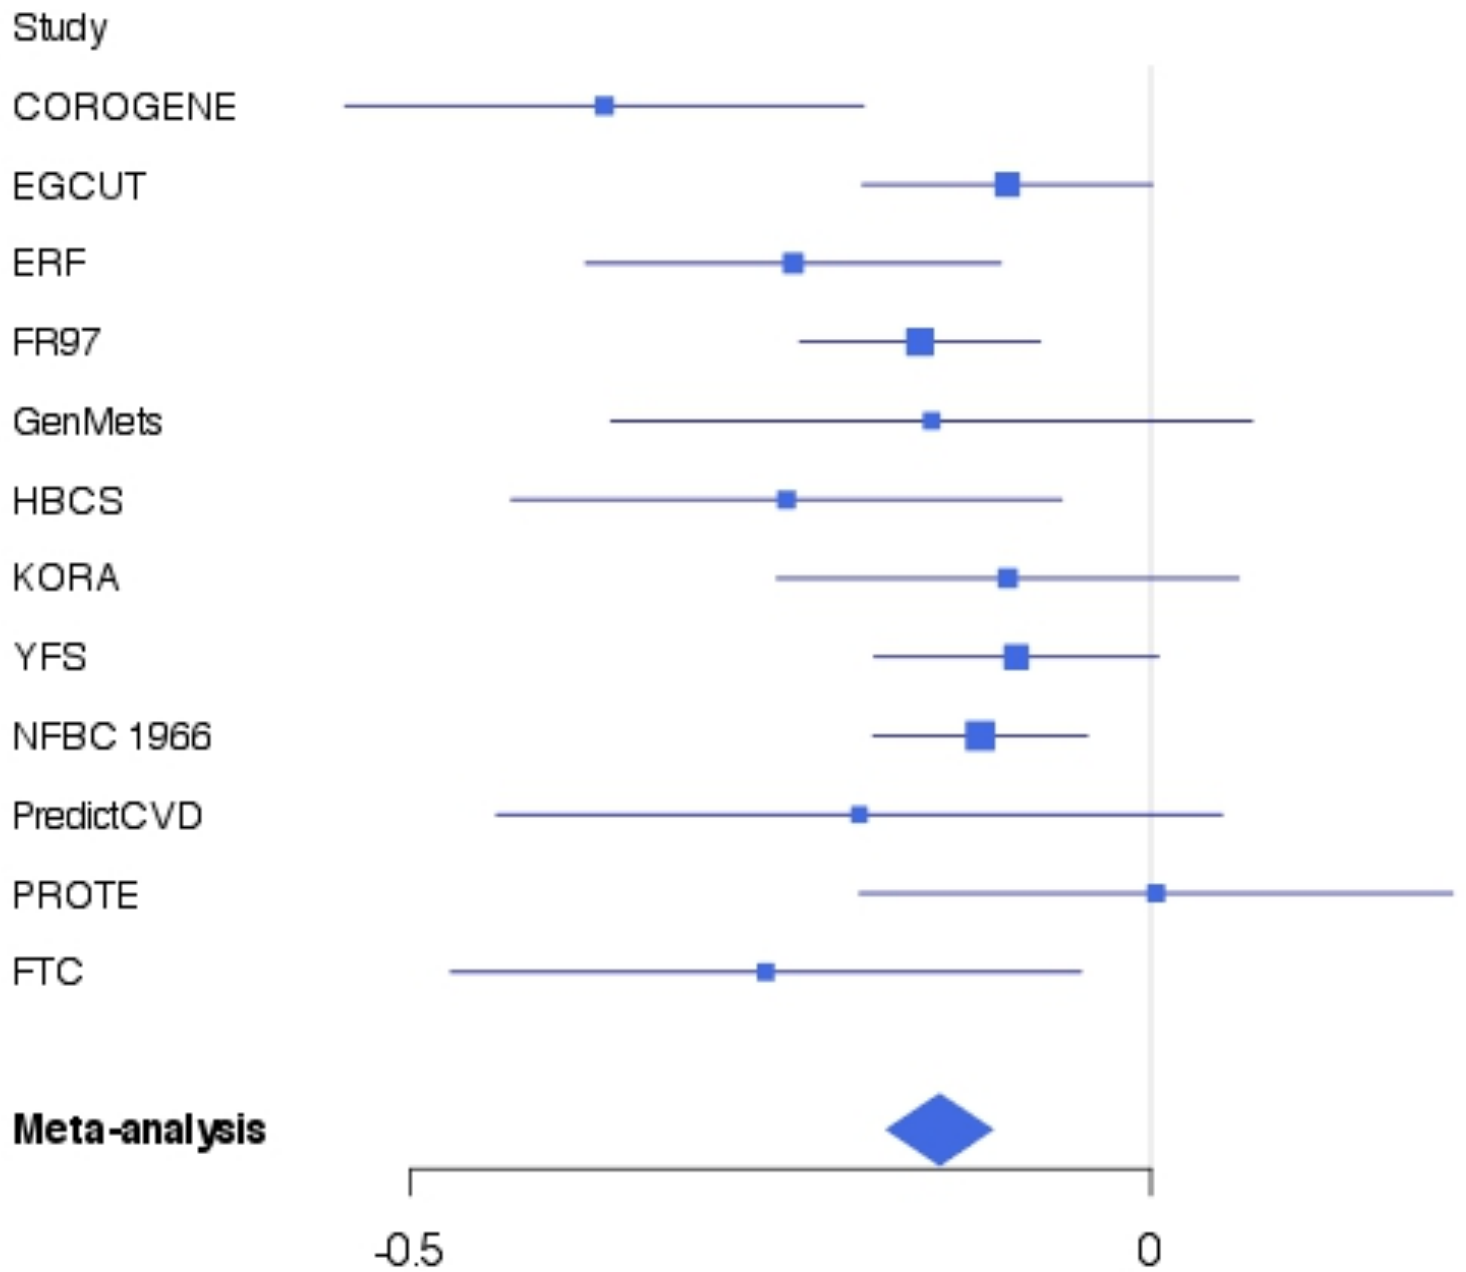

### SNP rs10211524, Chr 2, Pos 65208074, Val

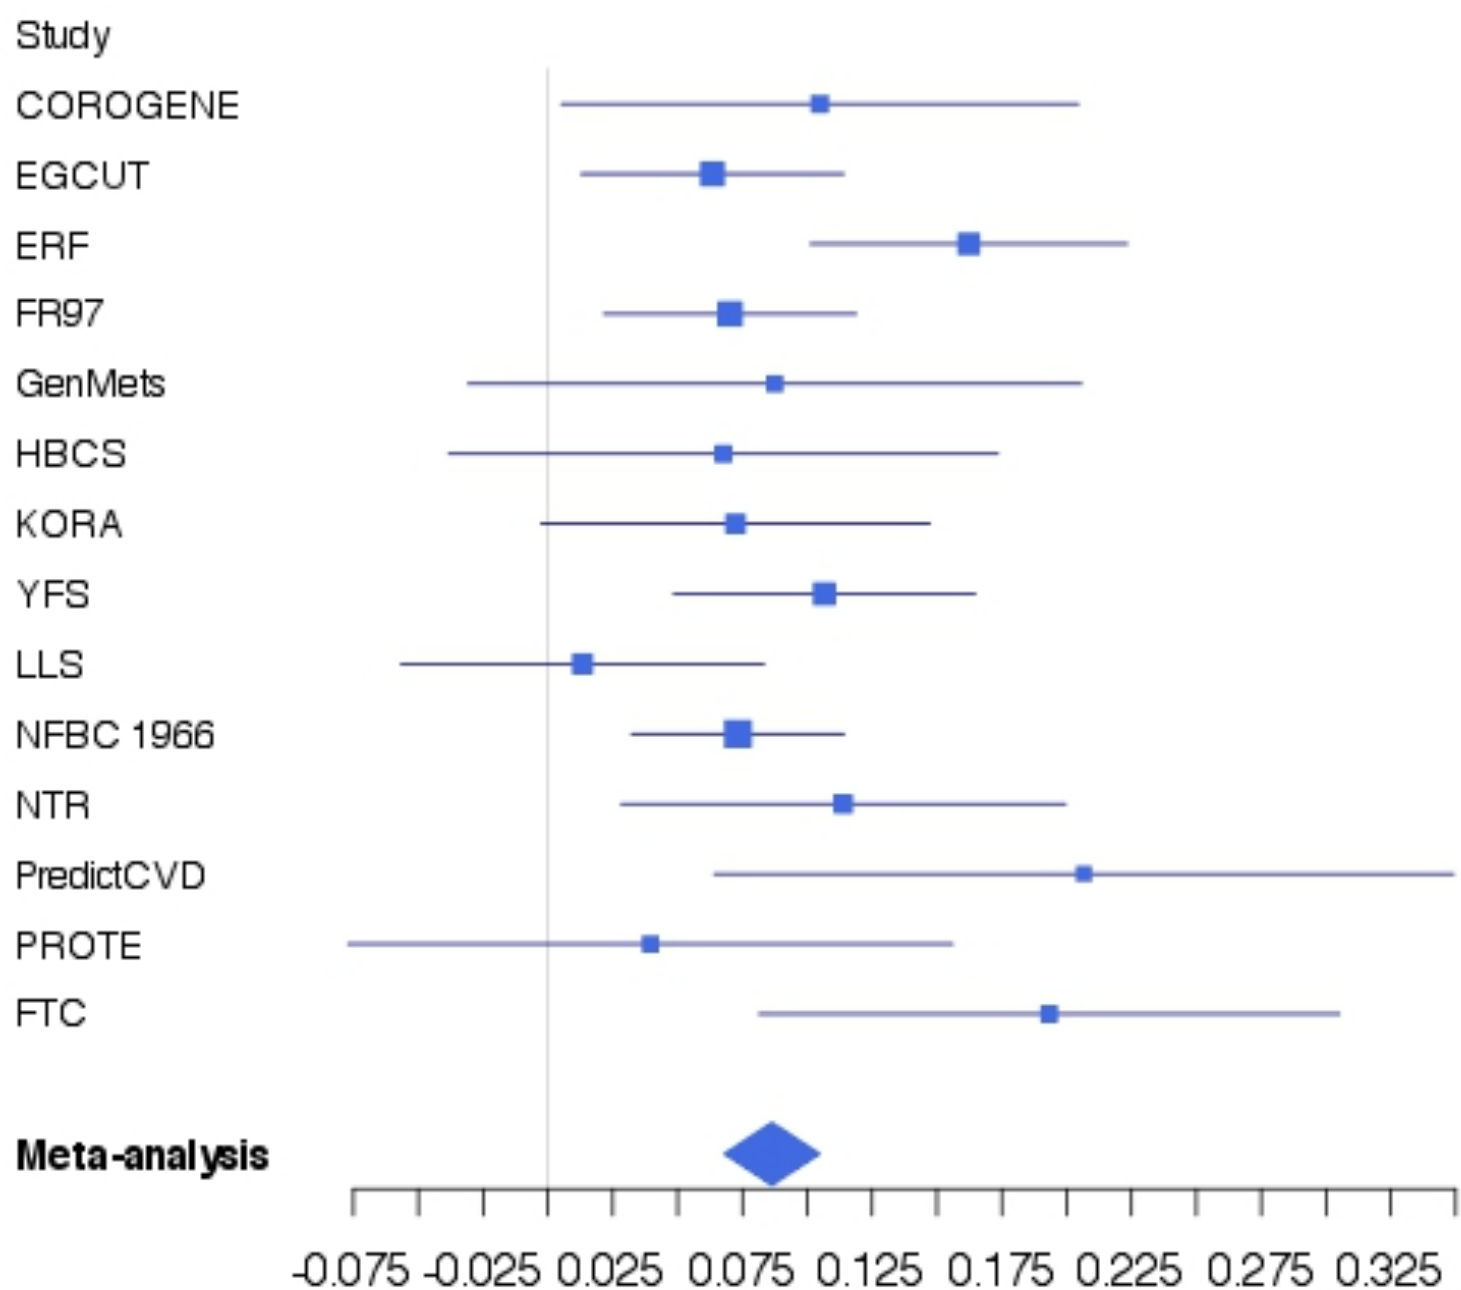

### SNP rs560887, Chr 2, Pos 169763148, Glc

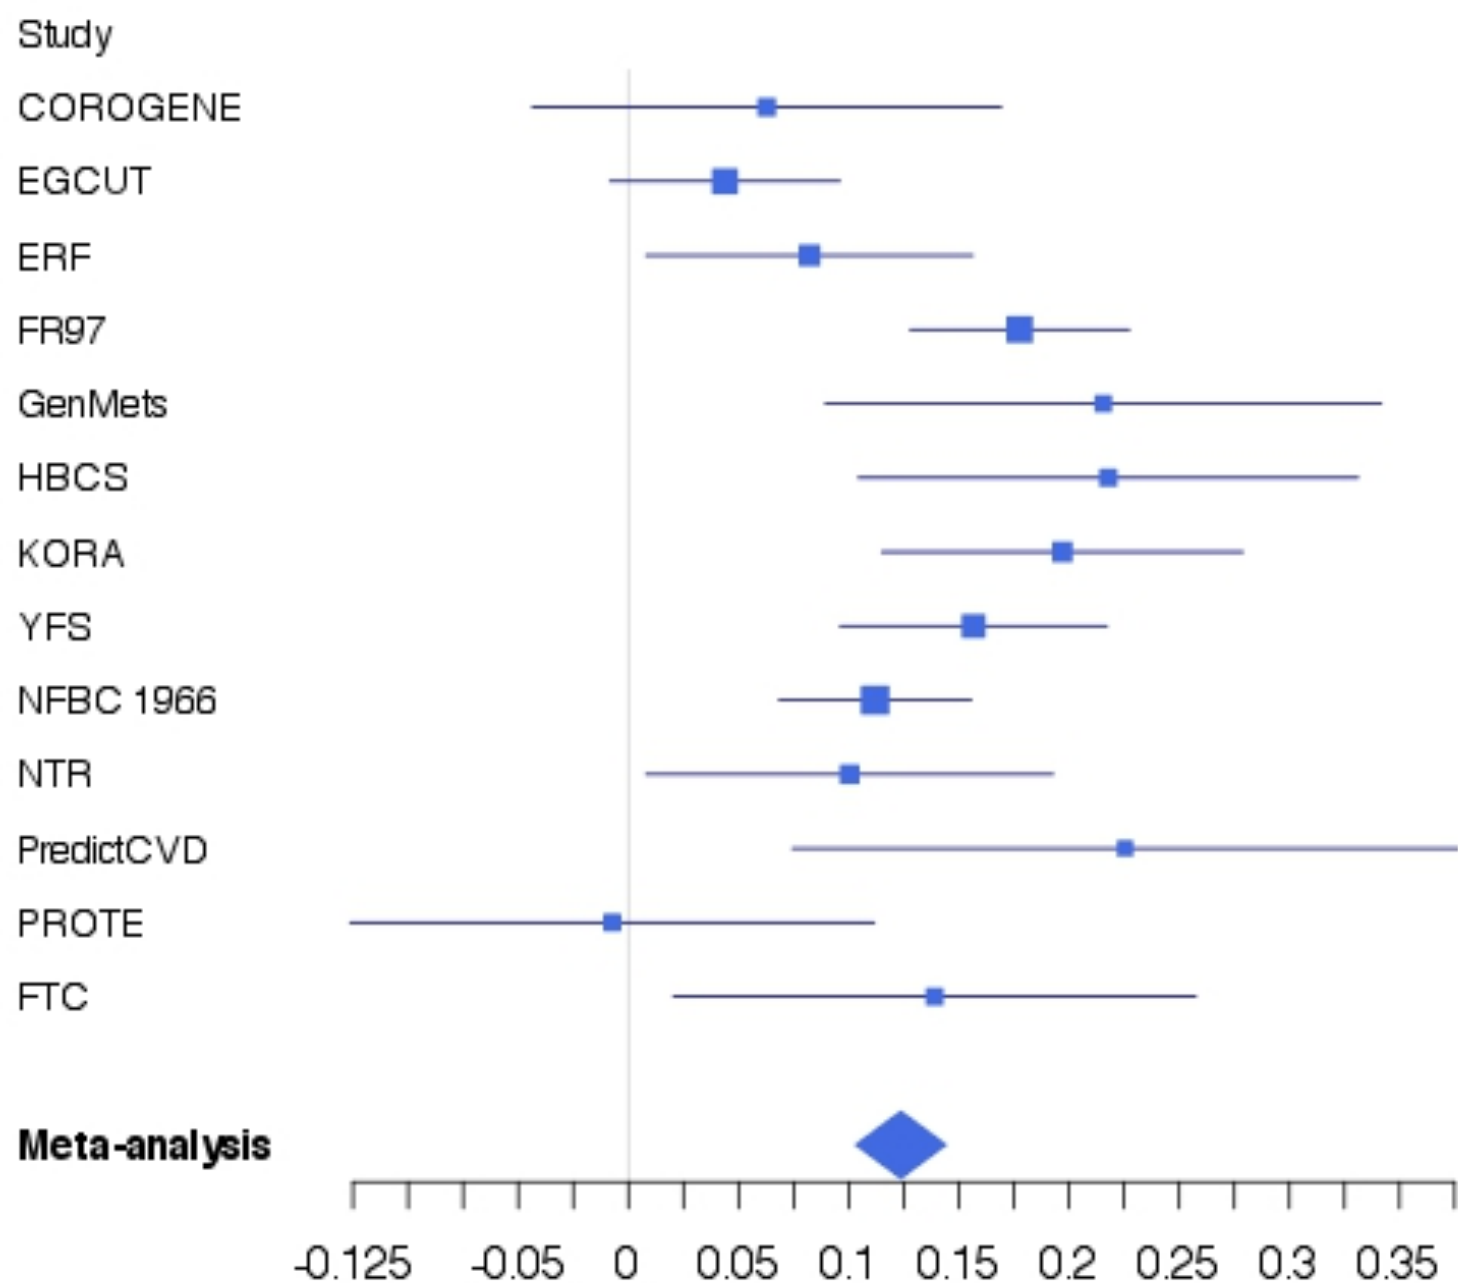



### SNP rs1047891, Chr 2, Pos 211540507, Gly

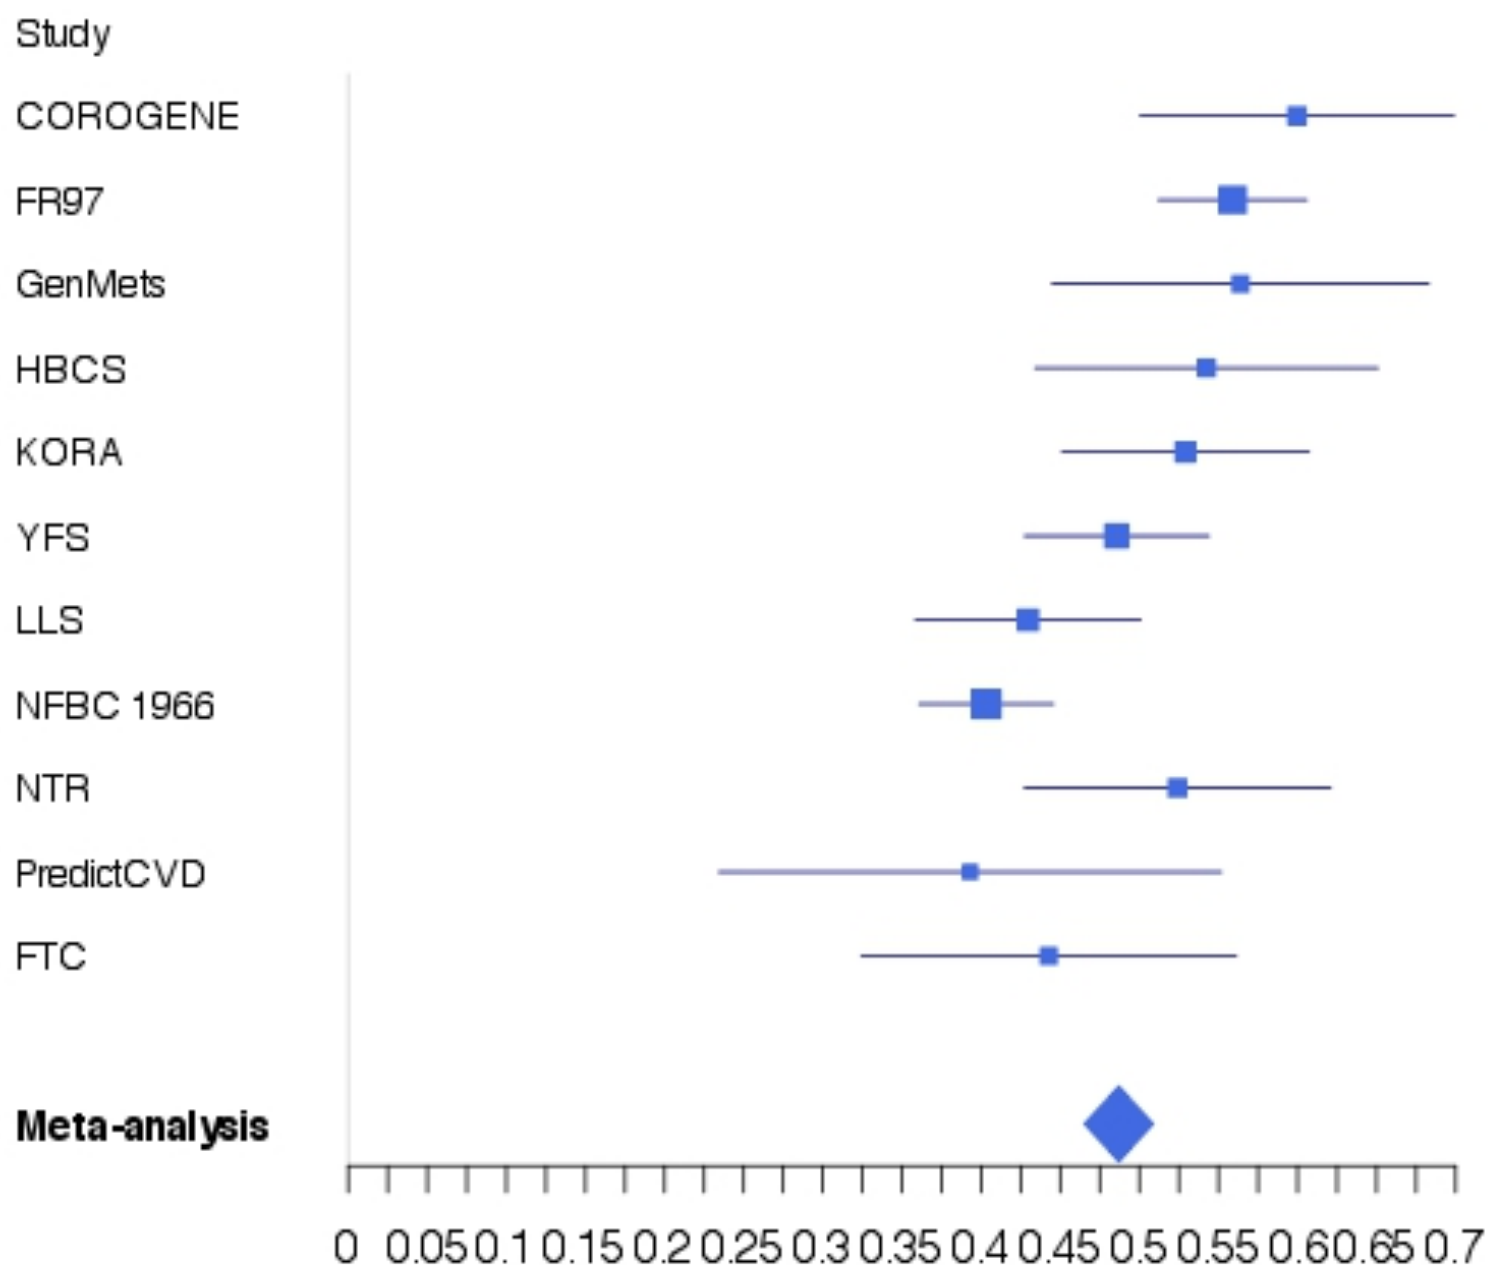

### SNP rs952275, Chr 2, Pos 21221399, IDL.FC

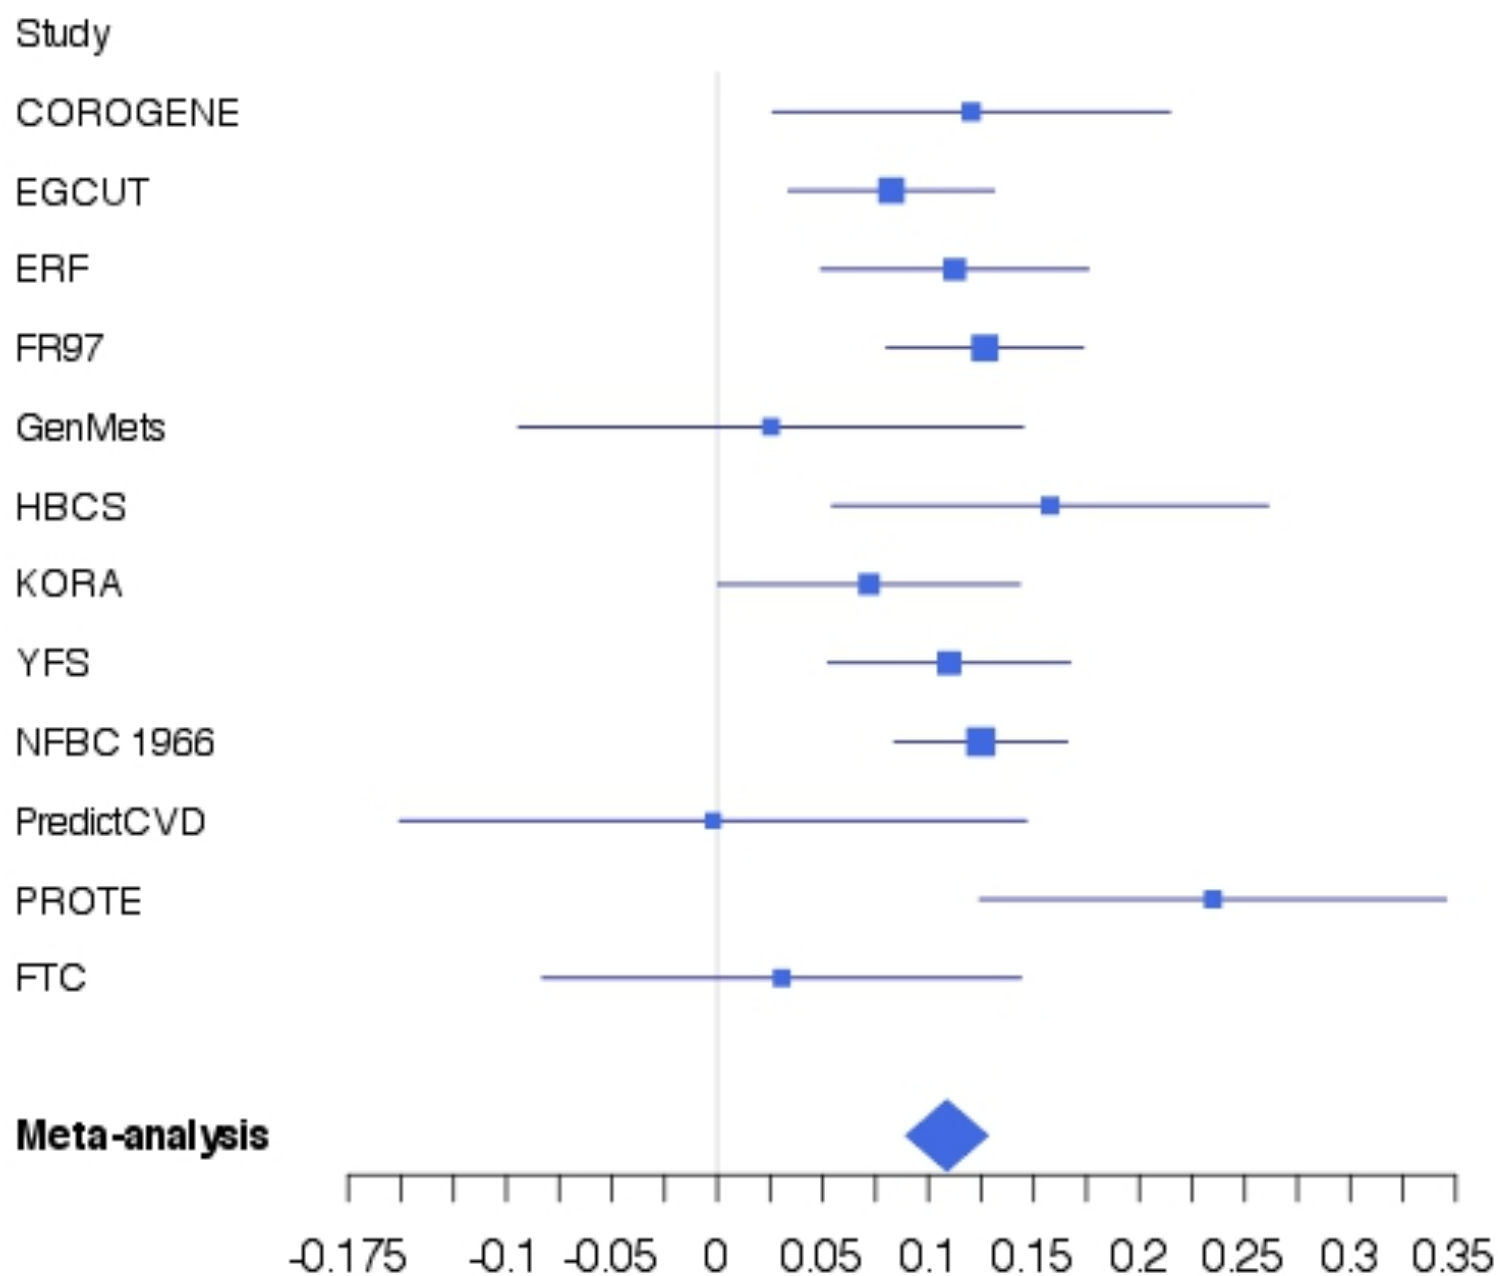

### SNP rs1260326, Chr 2, Pos 27730940, Ala

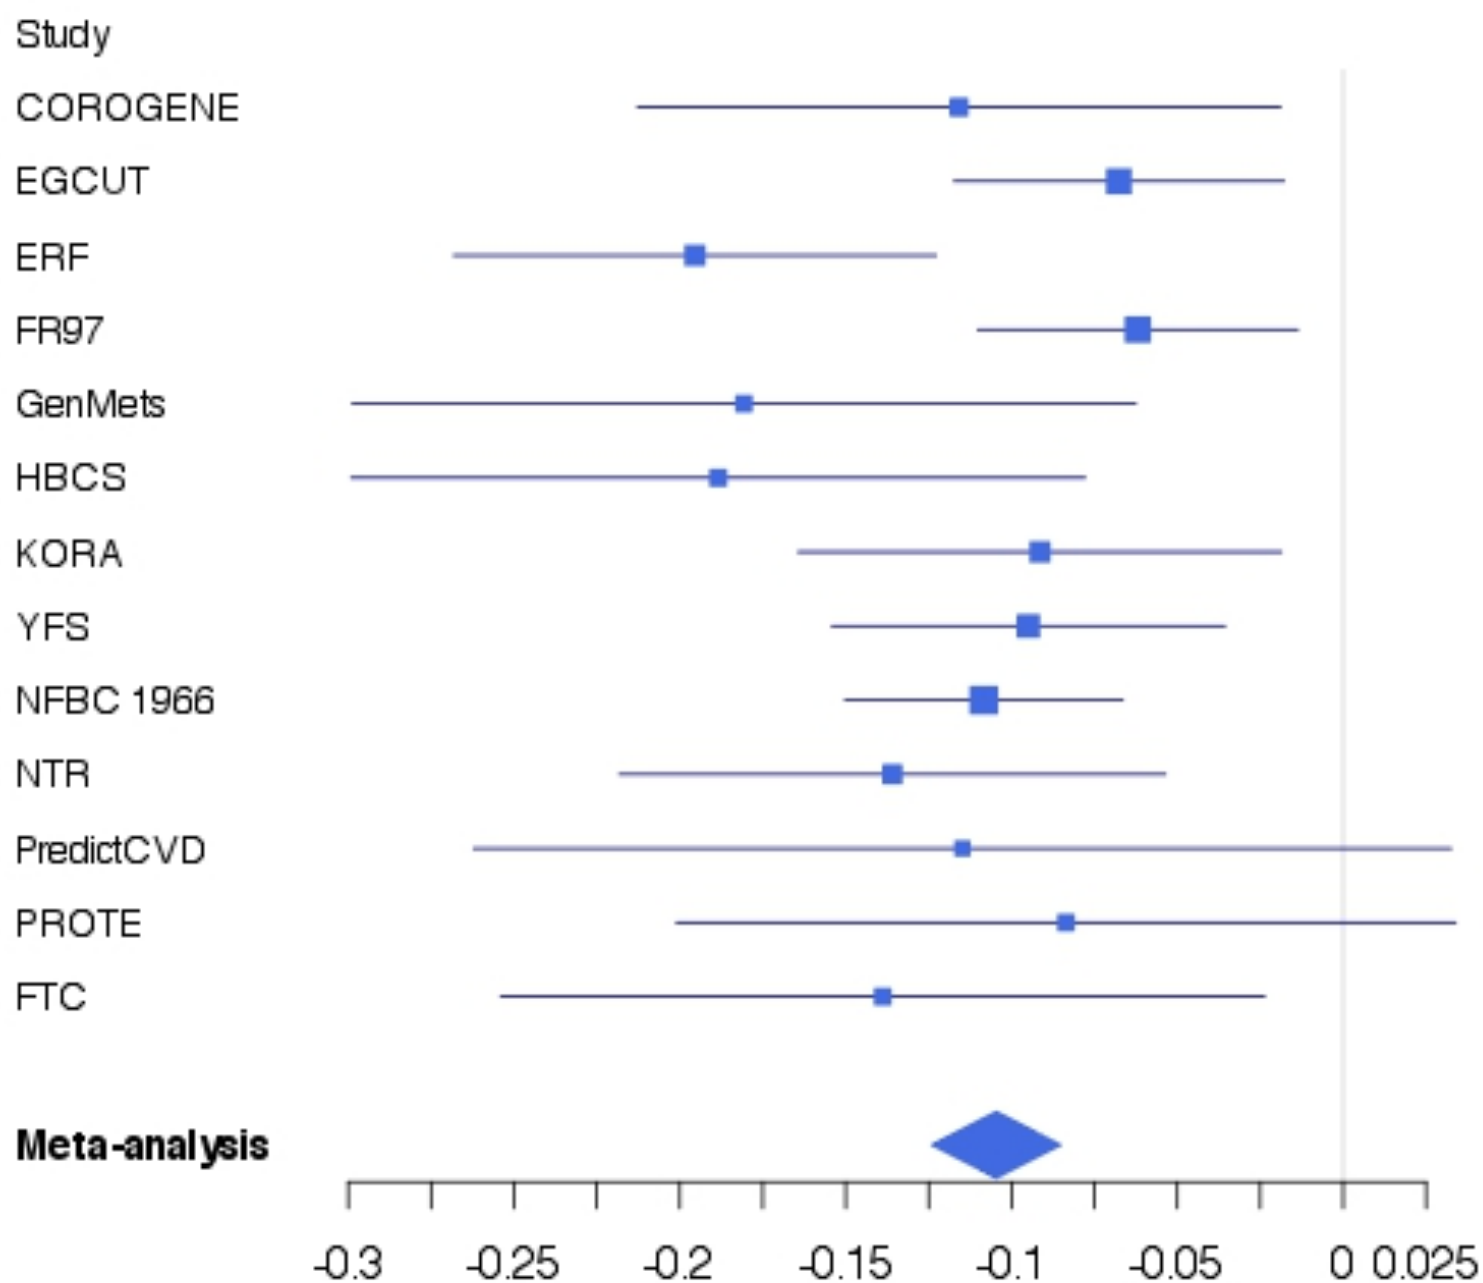

### SNP chr3:125905336:D, Chr 3, Pos 125905336, Gly

Study

COROGENE

FR97

GenMets

HBCS

KORA

YFS

LLS

NFBC 1966

PredictCVD

FTC

**Meta-analysis**

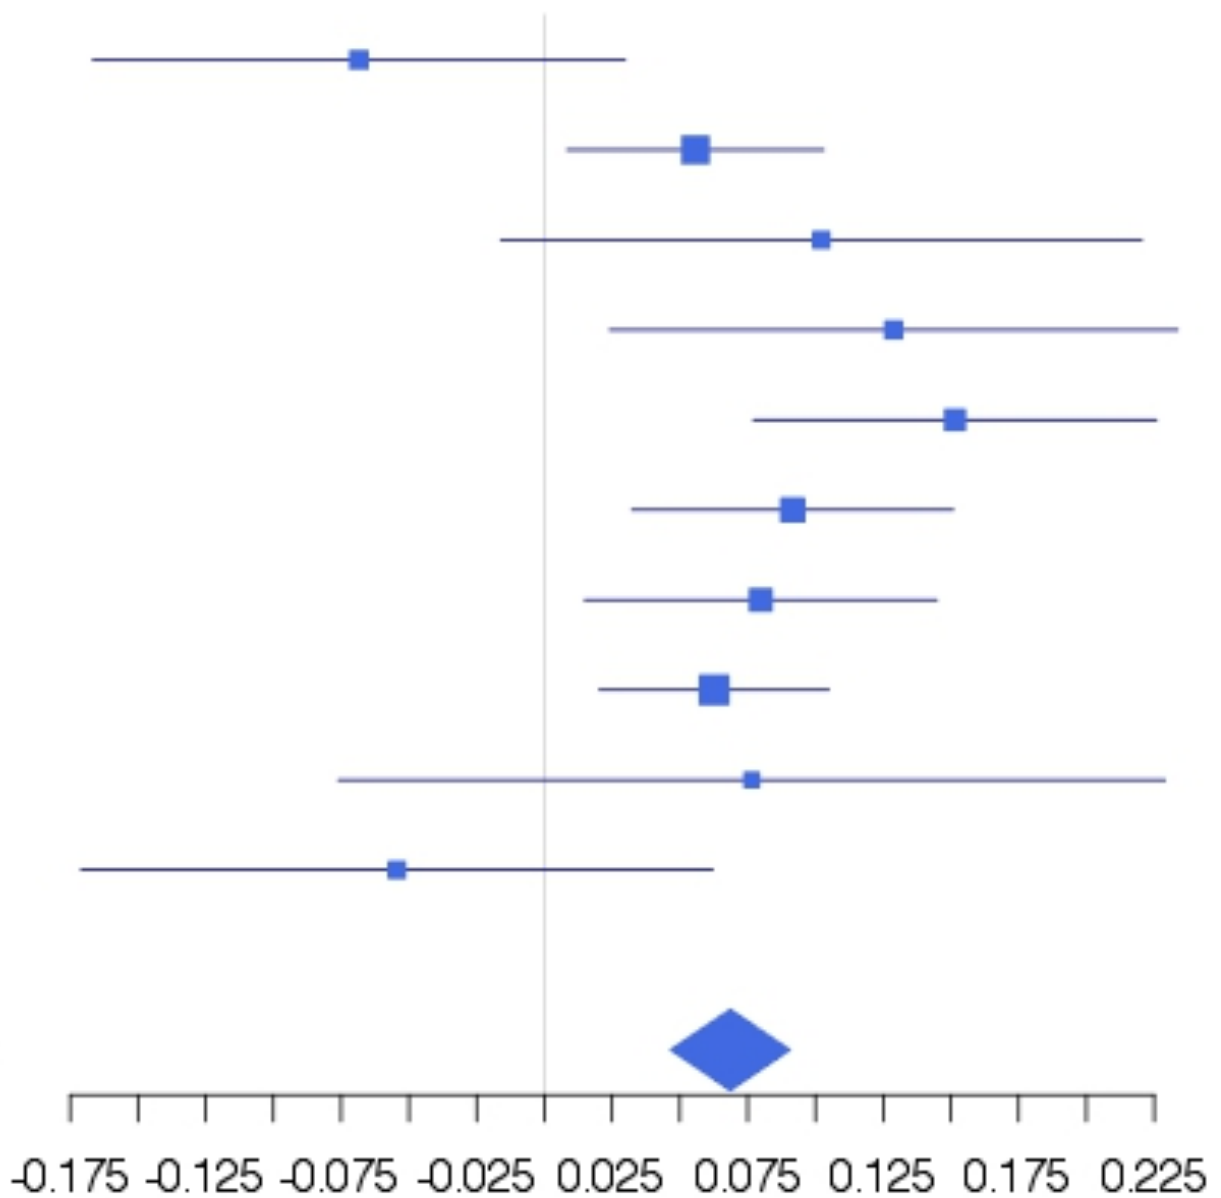

### SNP rs184650103, Chr 4, Pos 74850649, Alb

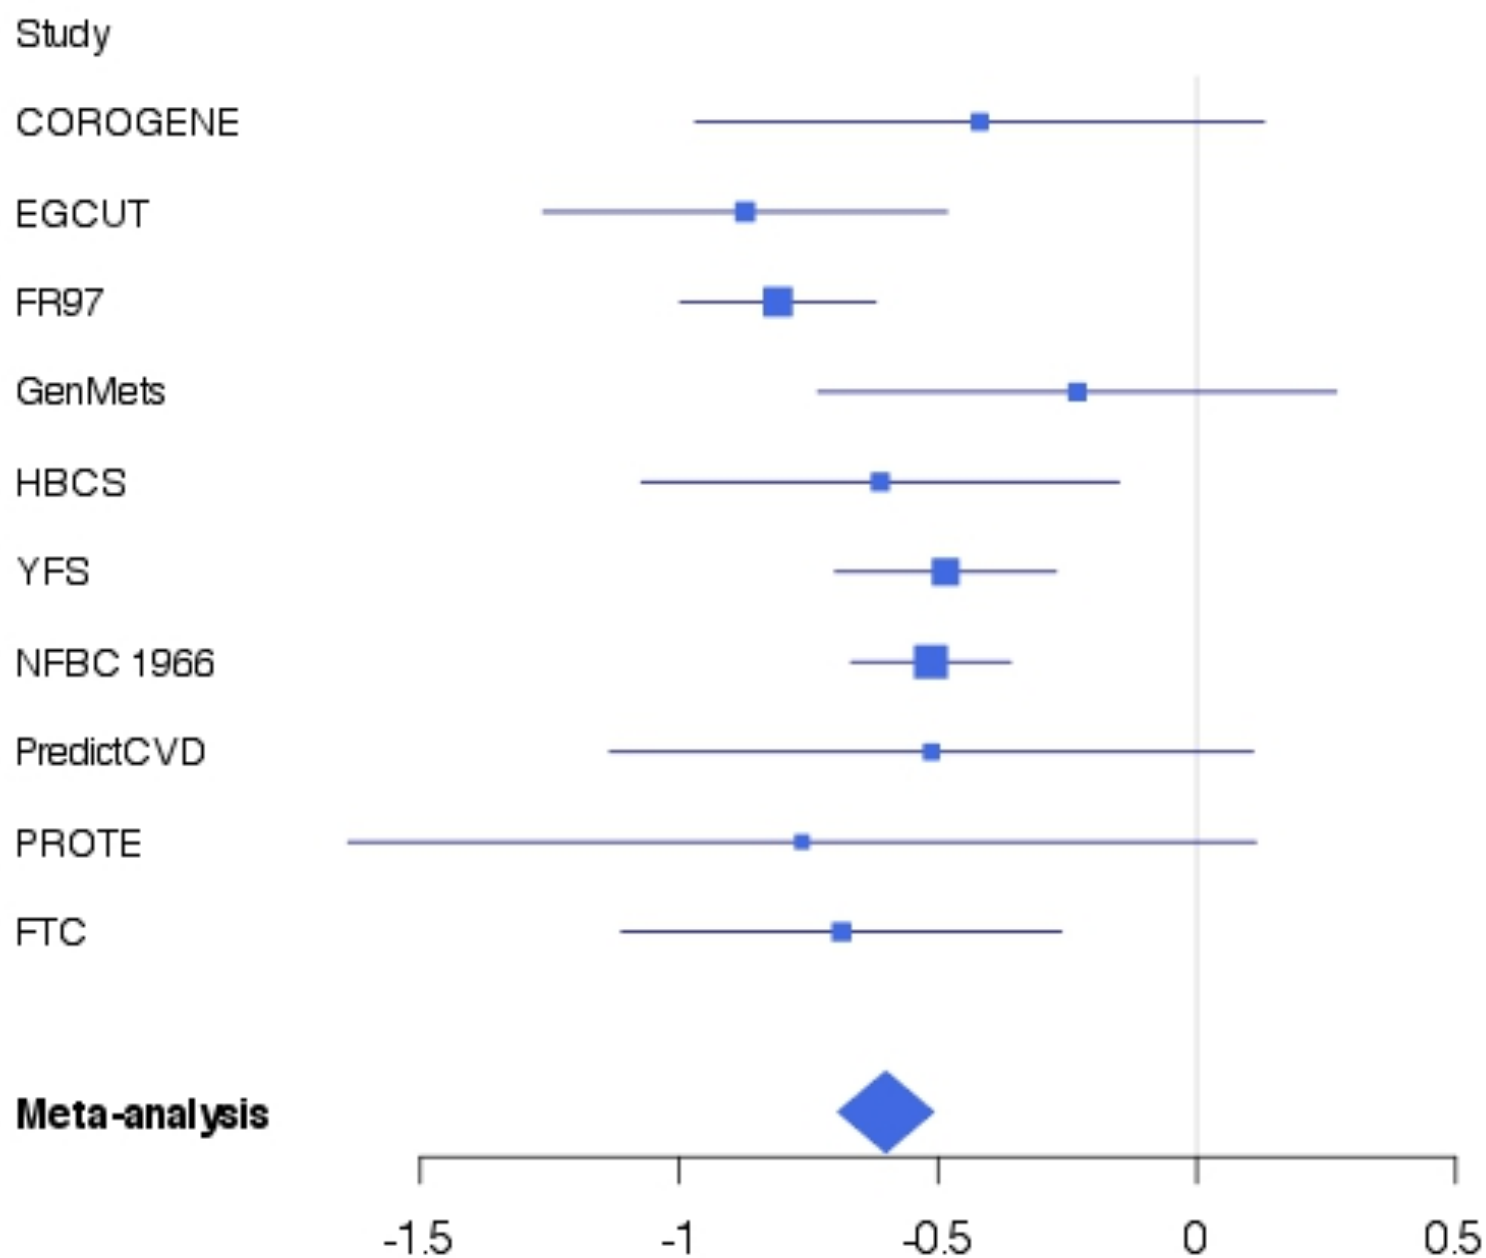

### SNP rs1986734, Chr 4, Pos 77420787, Crea

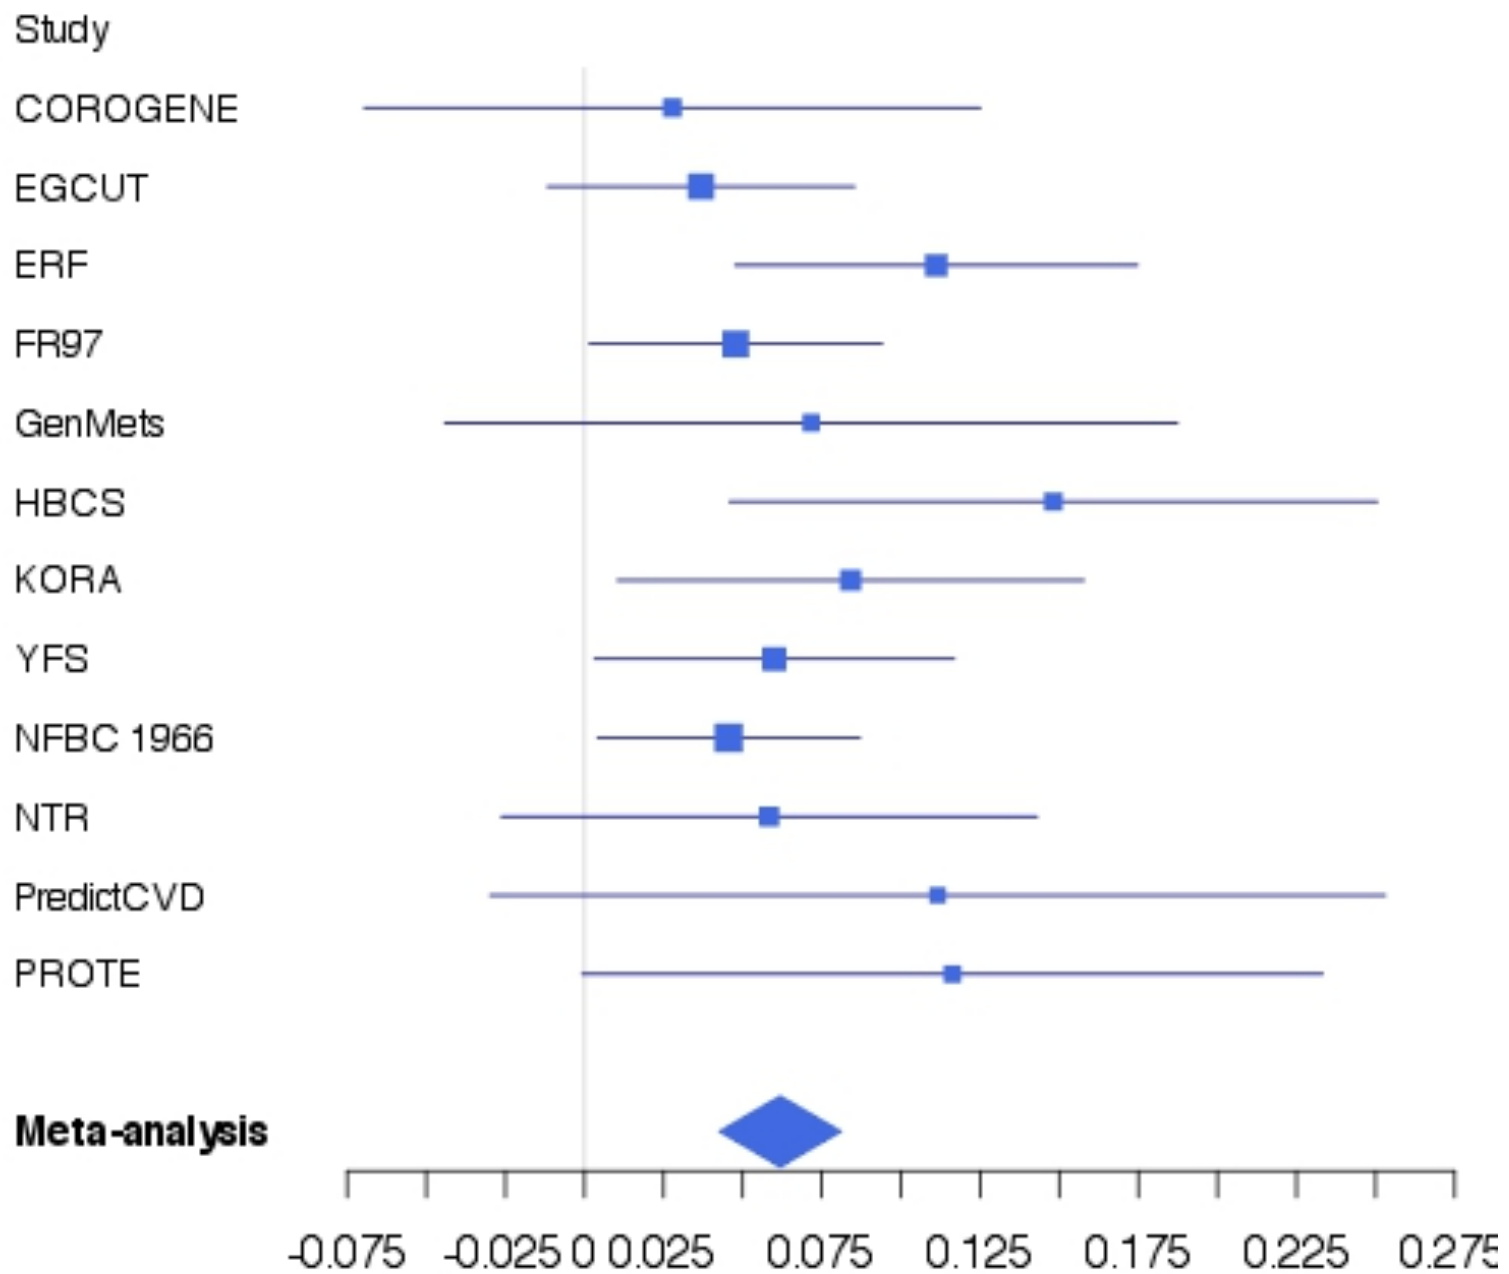

### SNP rs9637599, Chr 4, Pos 89206230, Val

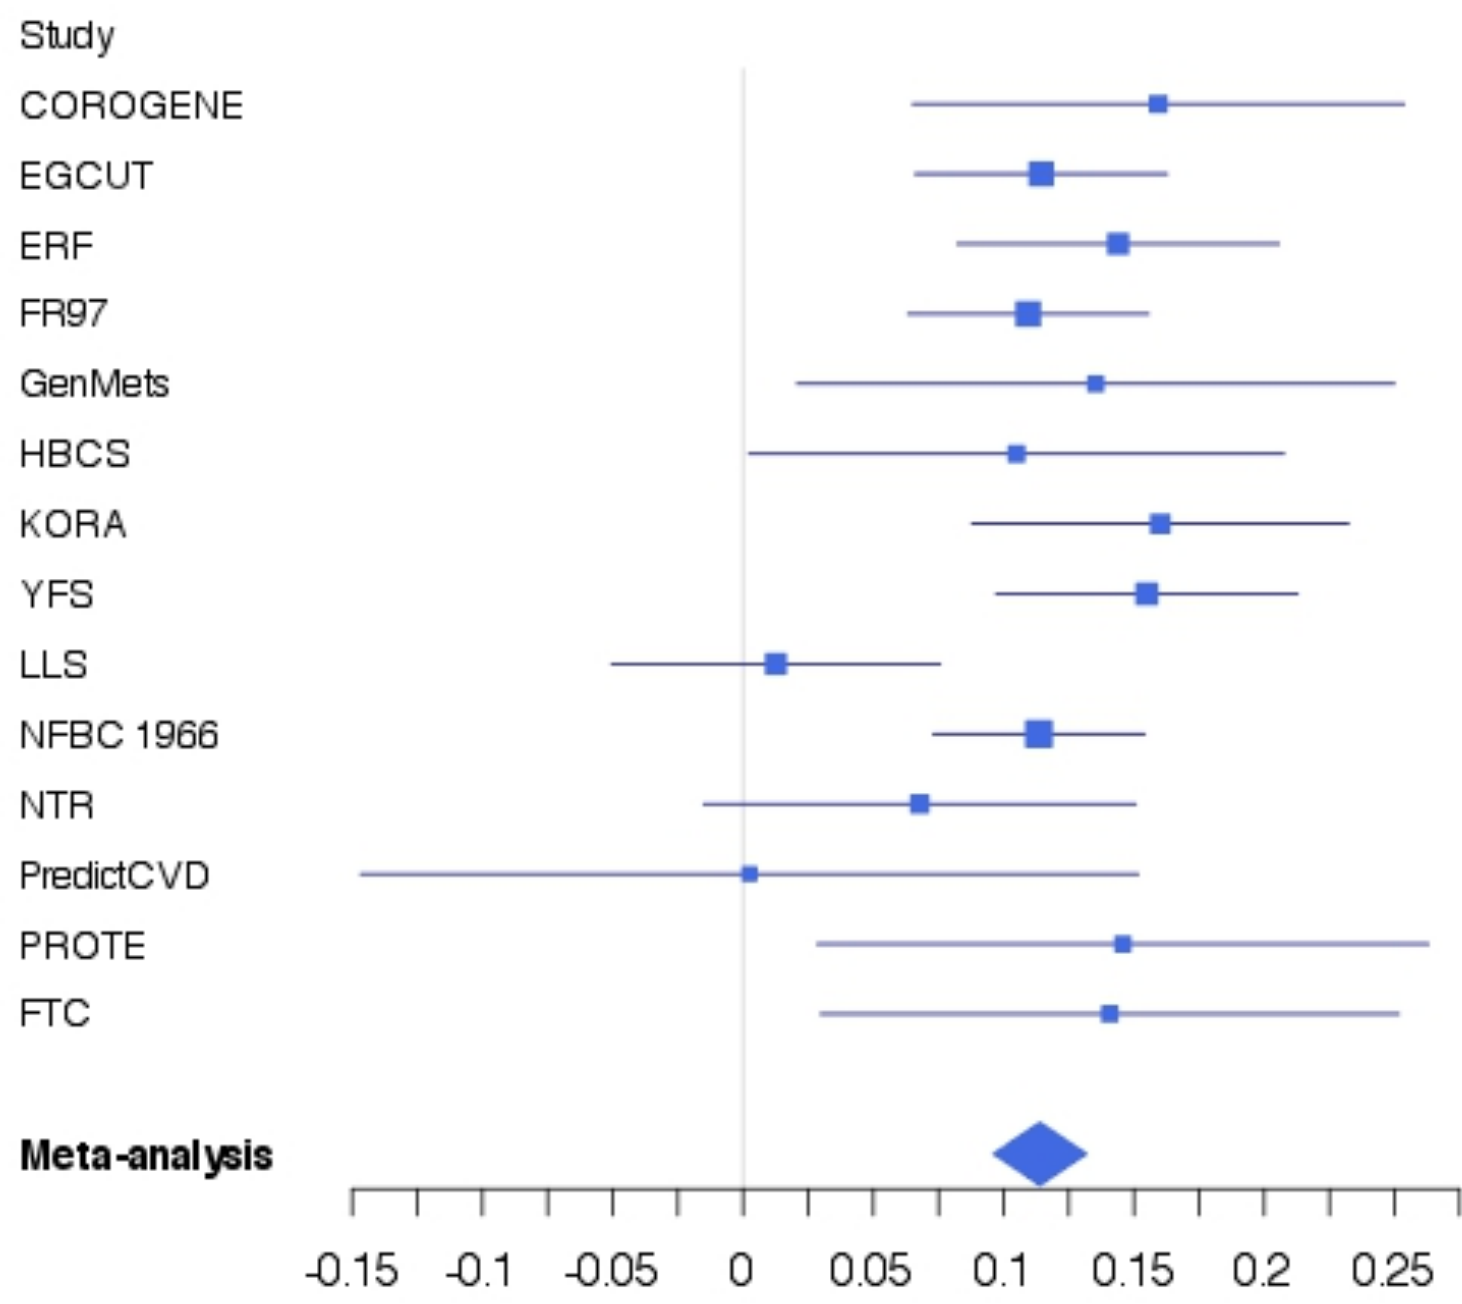

### SNP rs3733402, Chr 4, Pos 187158034, His

Study

COROGENE

EGCUT

FR97

GenMets

HBCS

KORA

YFS

NFBC 1966

PredictCVD

PROTE

FTC

**Meta-analysis**

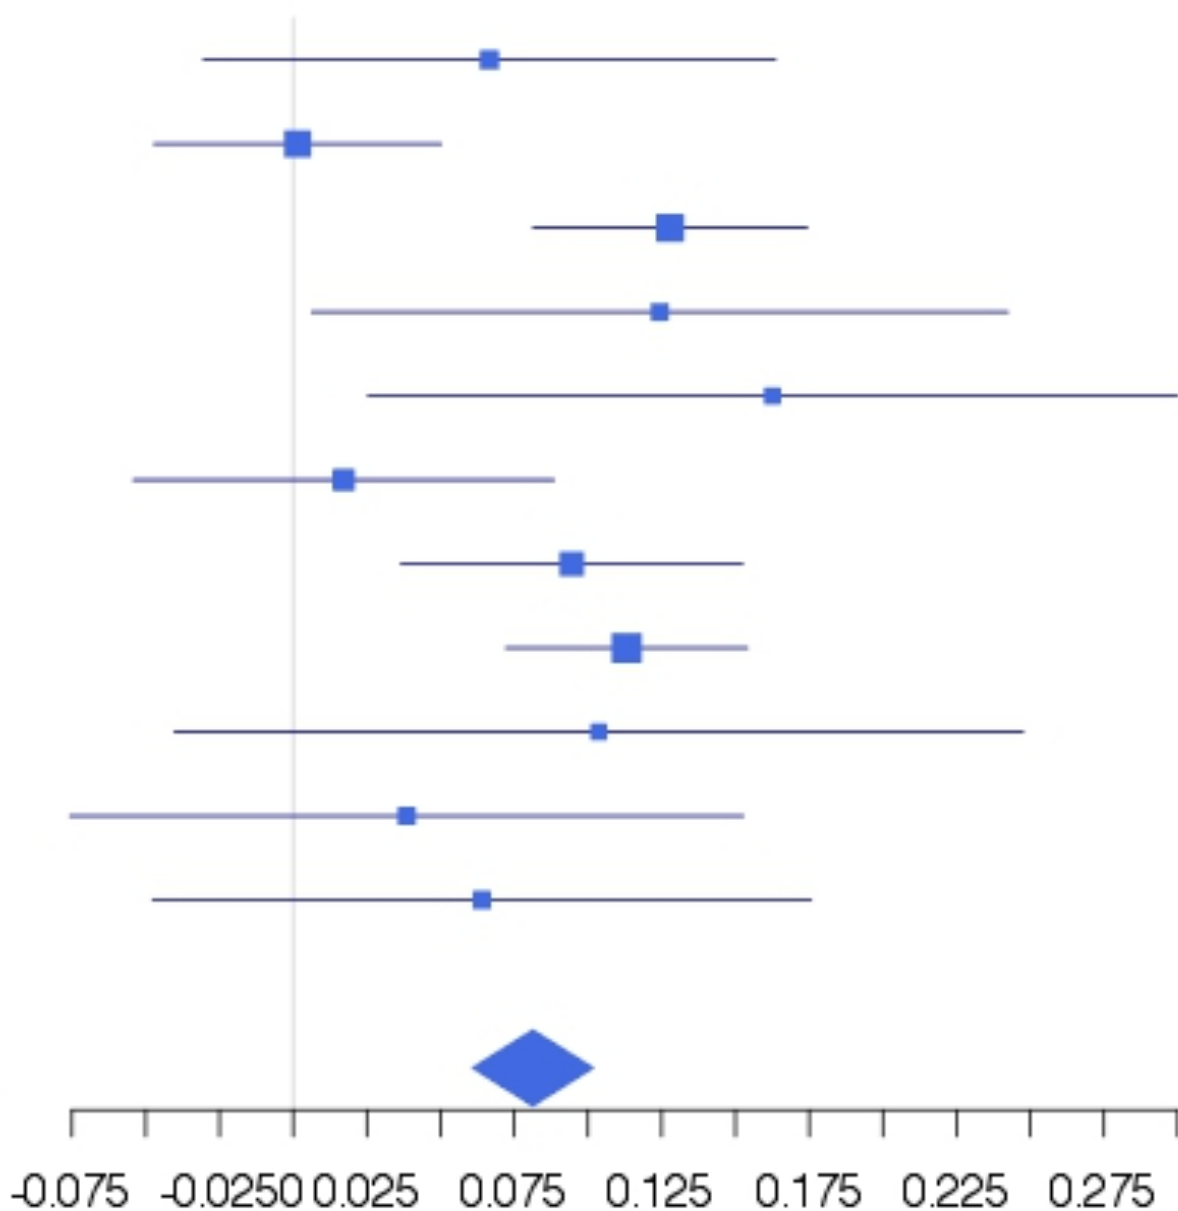



### SNP rs2921604, Chr 5, Pos 14867948, Cit

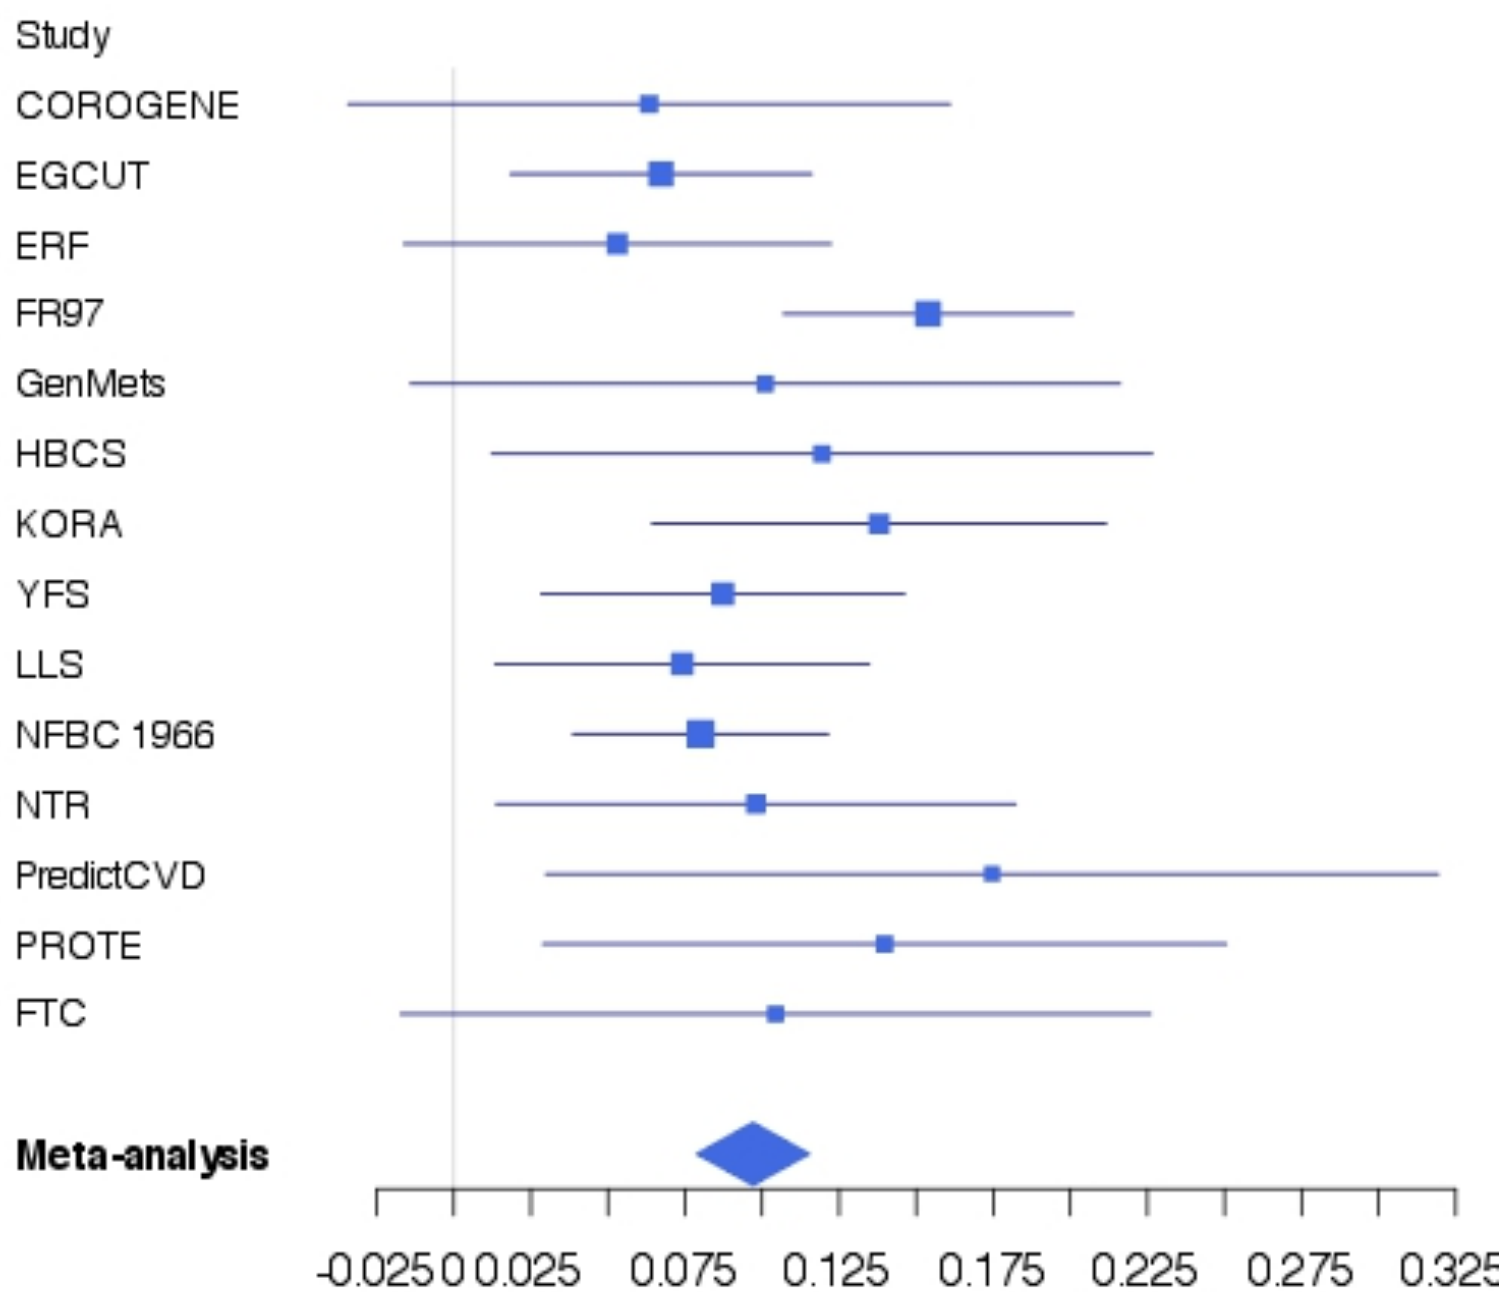

### SNP rs4703667, Chr 5, Pos 74613906, S.LDL.C

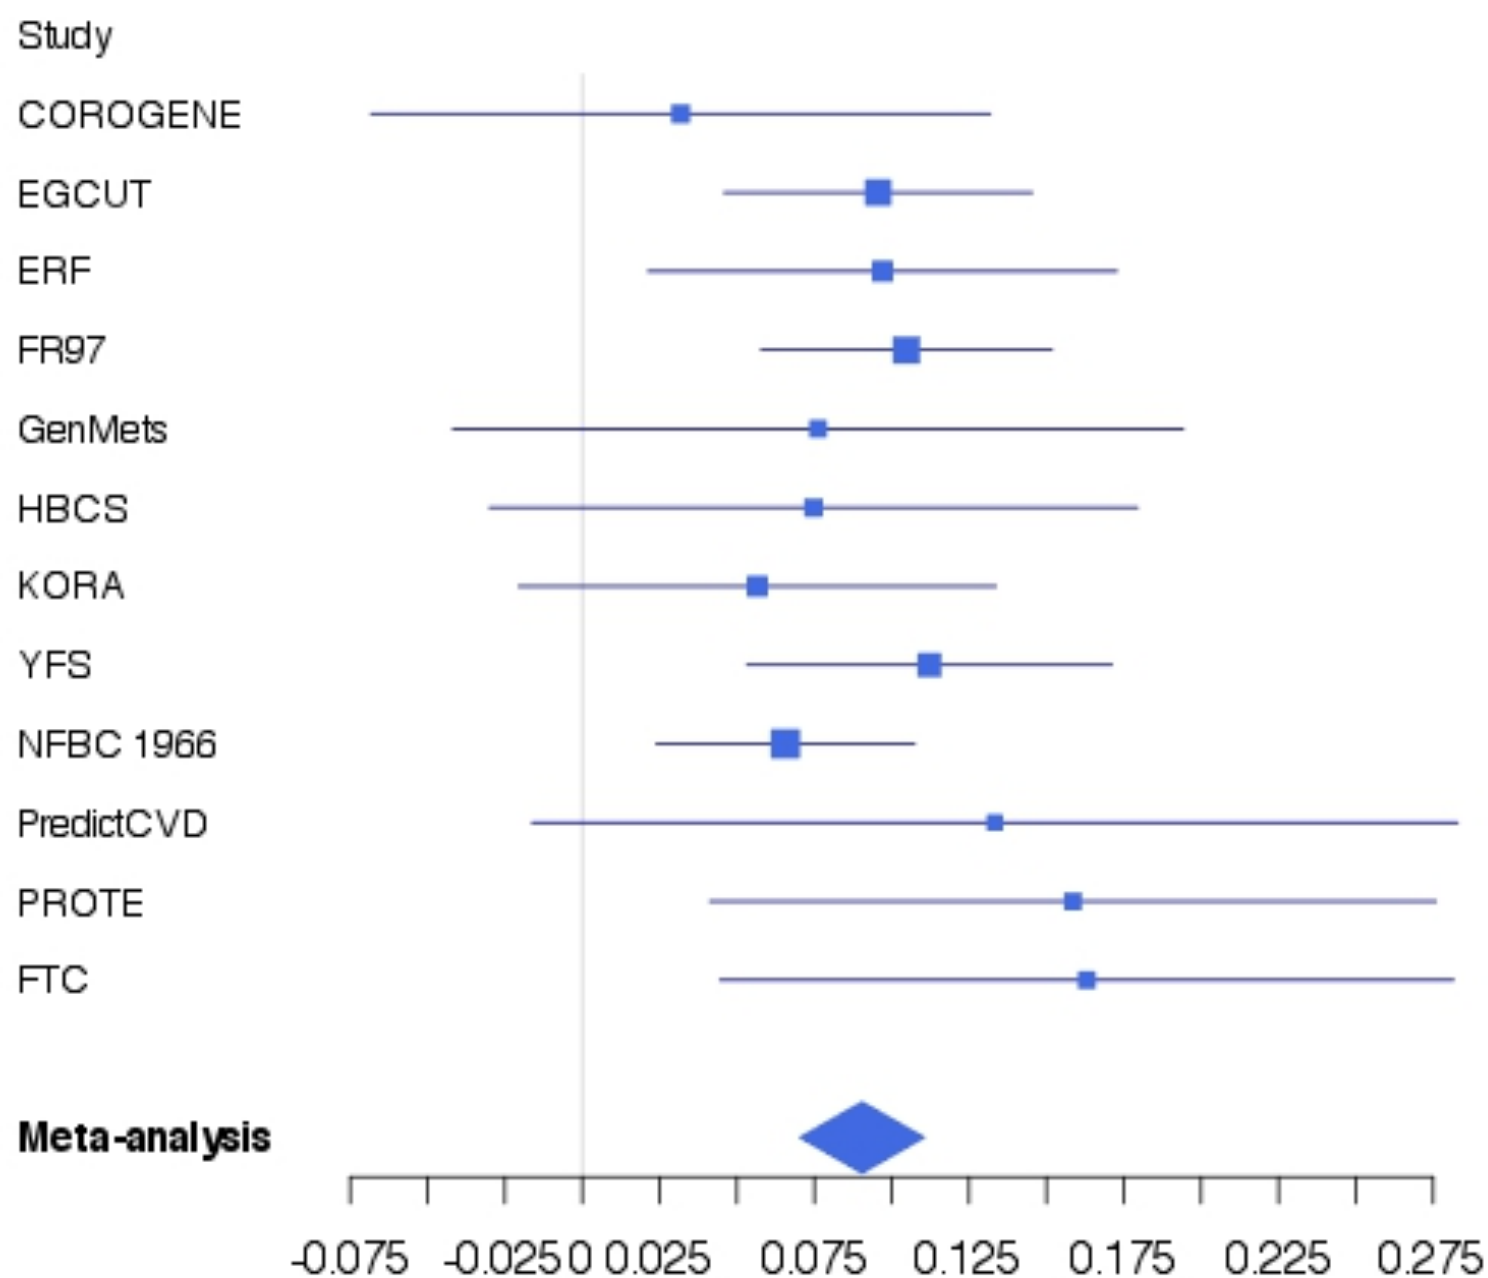

### SNP rs2731672, Chr 5, Pos 176842474, Phe

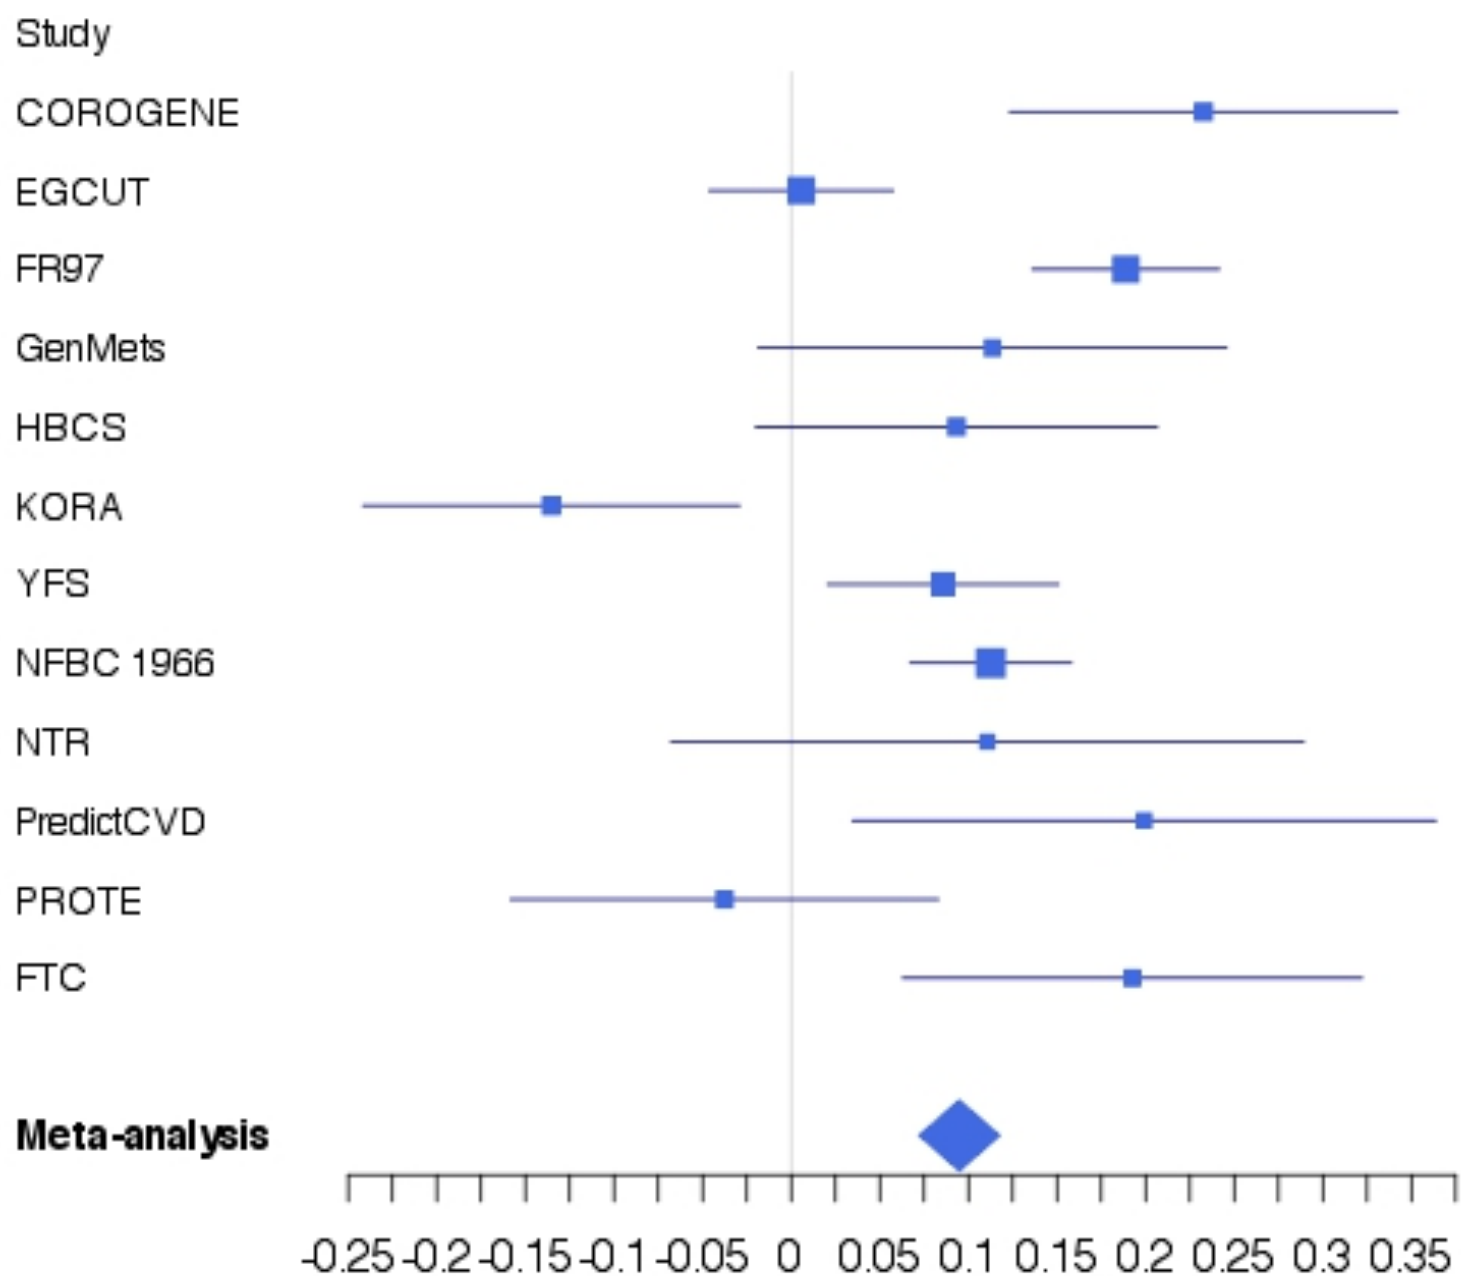

### SNP rs14399, Chr 6, Pos 111543944, Tyr

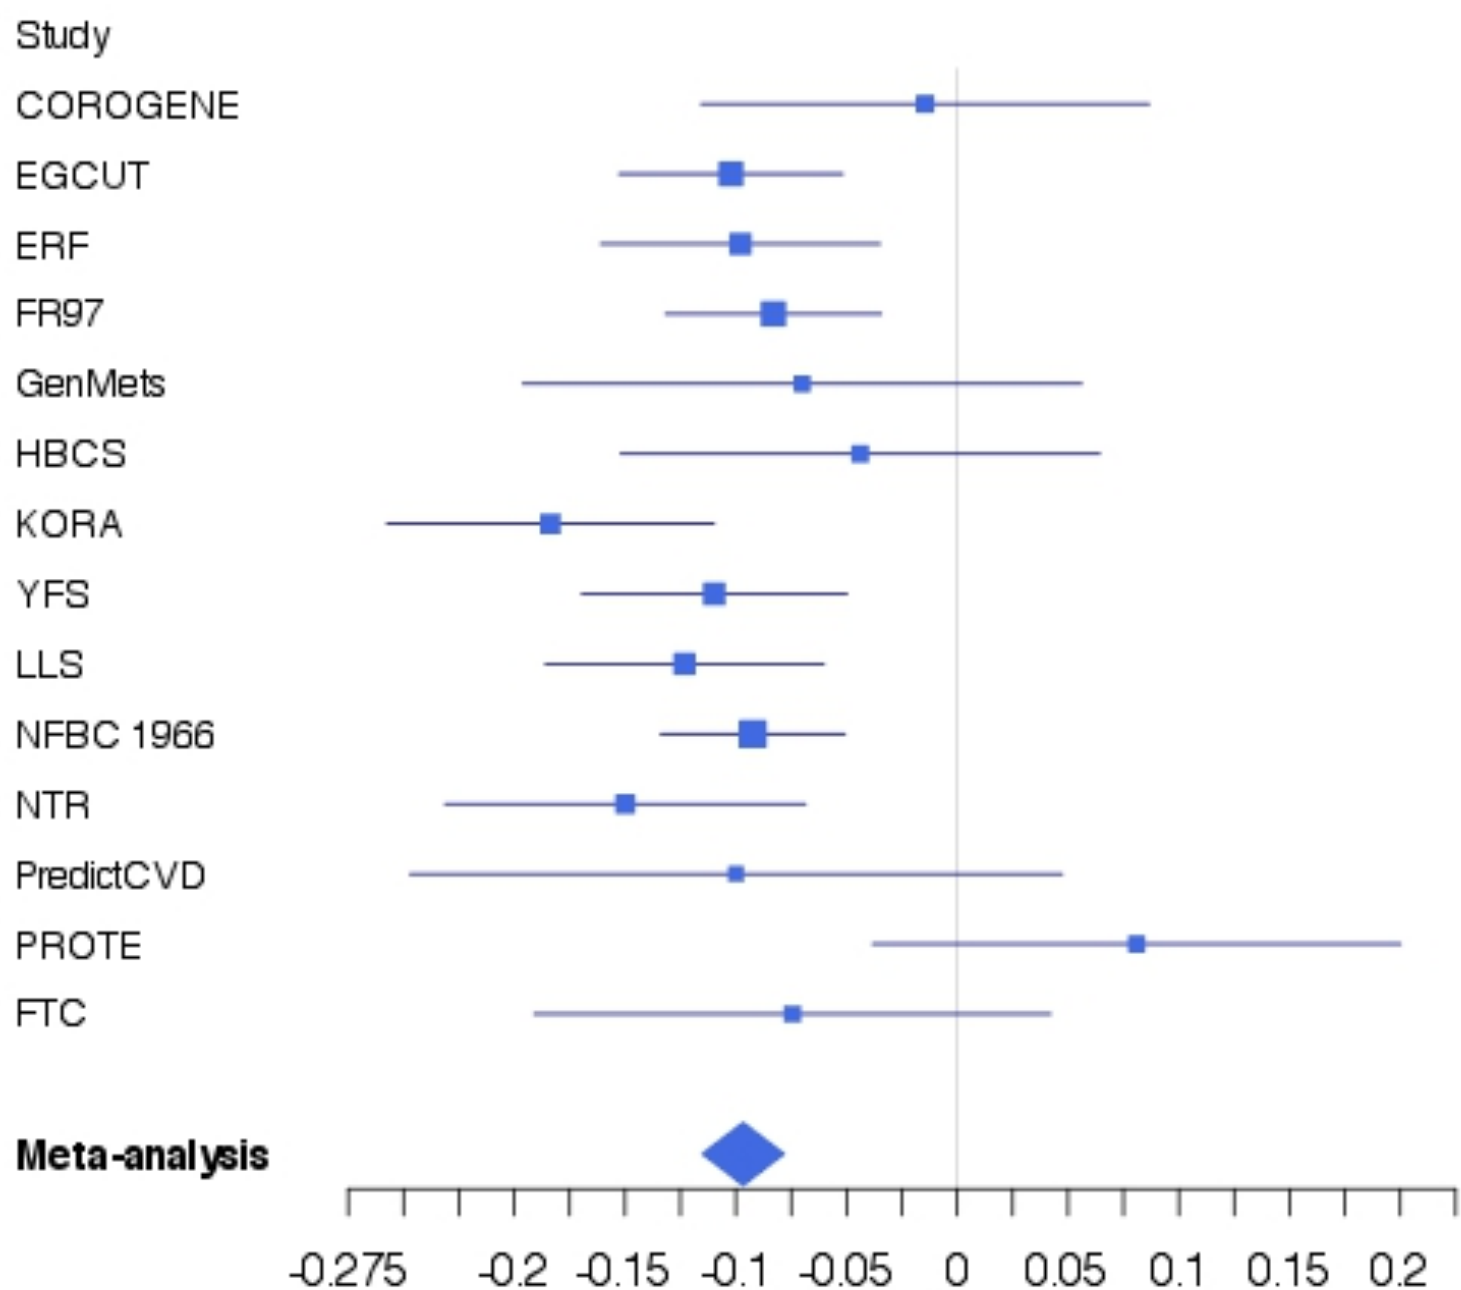

**SNP rs10455872, Chr 6, Pos 161010118, VLDL.D**

Study

COROGENE

EGCUT

FR97

GenMets

HBCS

KORA

YFS

NFBC 1966

PredictCVD

PROTE

FTC

**Meta-analysis**

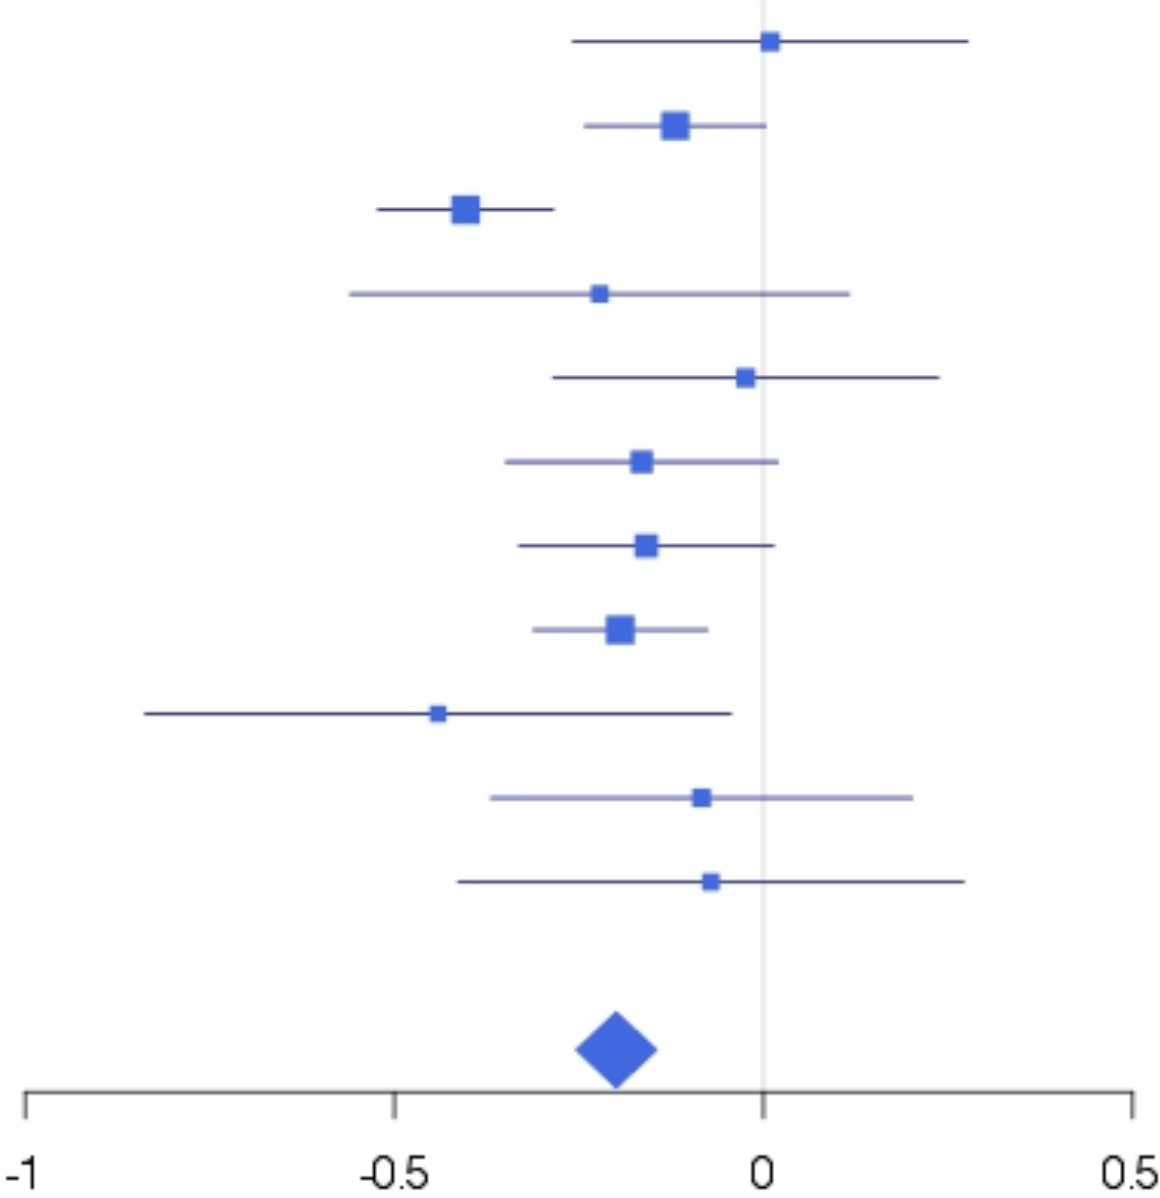

### SNP rs73066442, Chr 7, Pos 21592973, L.LDL.PL

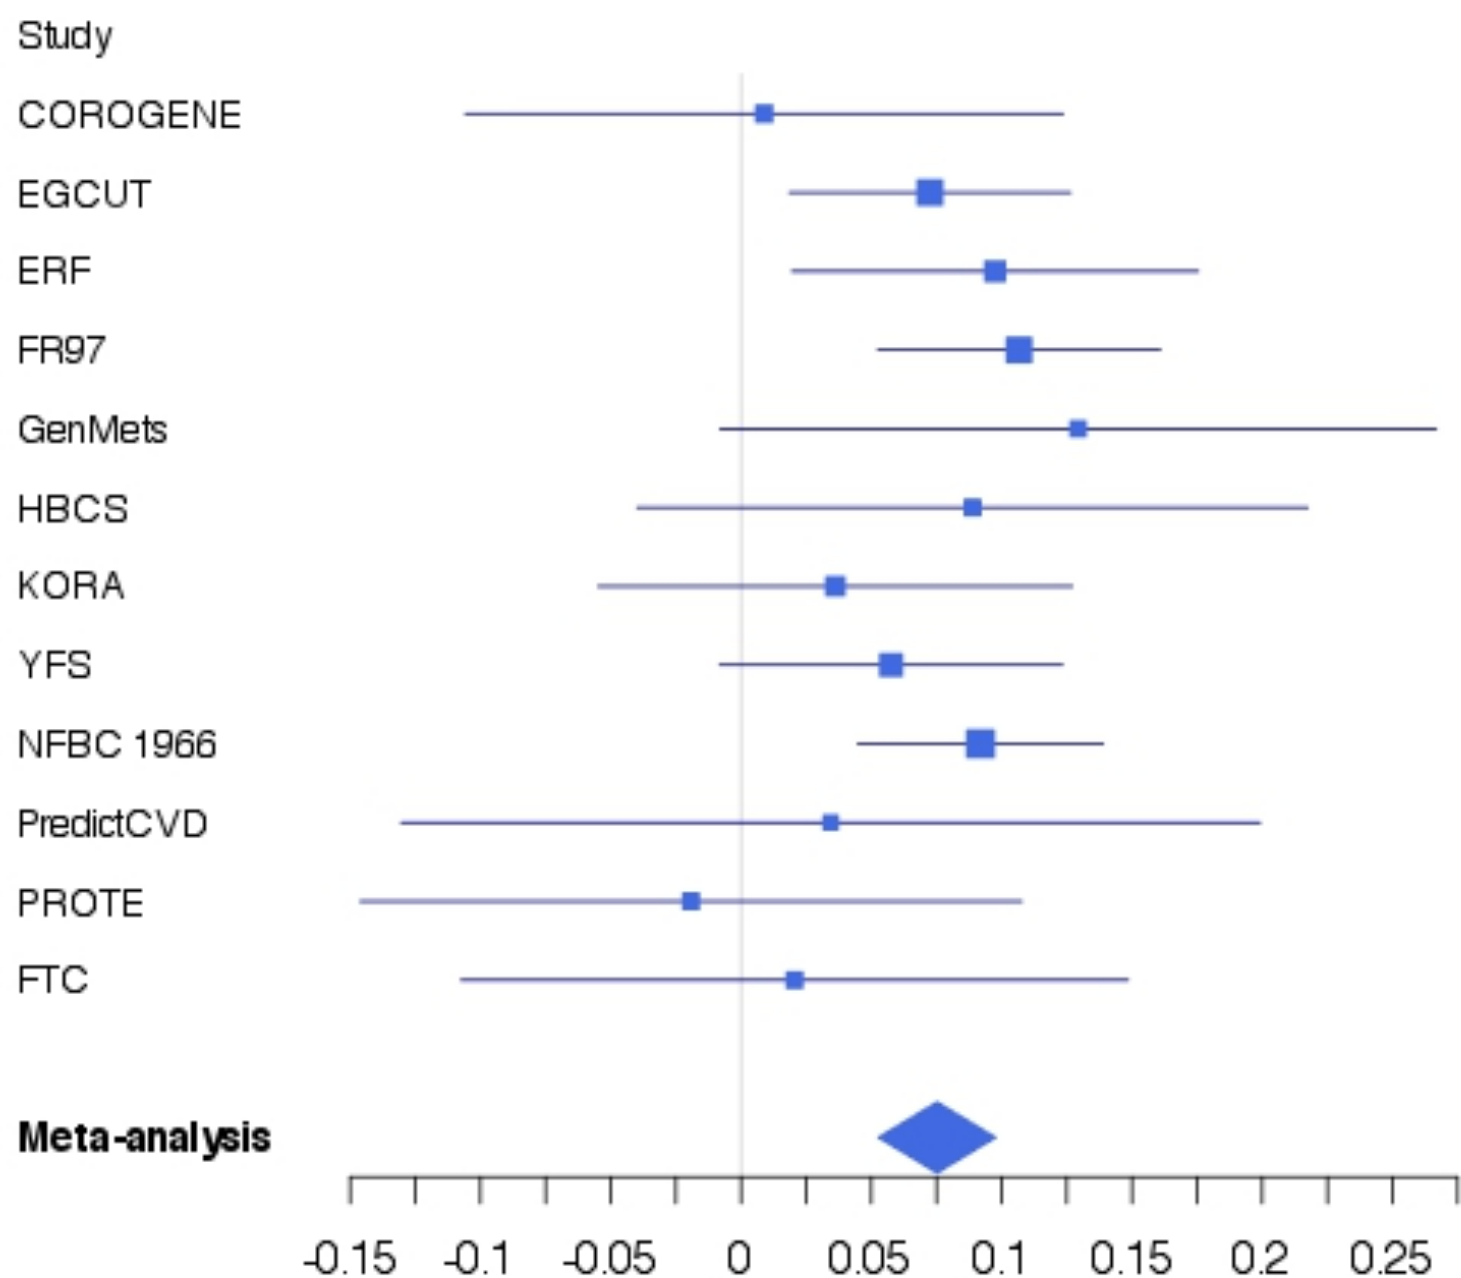

### SNP rs878521, Chr 7, Pos 44255643, Glc

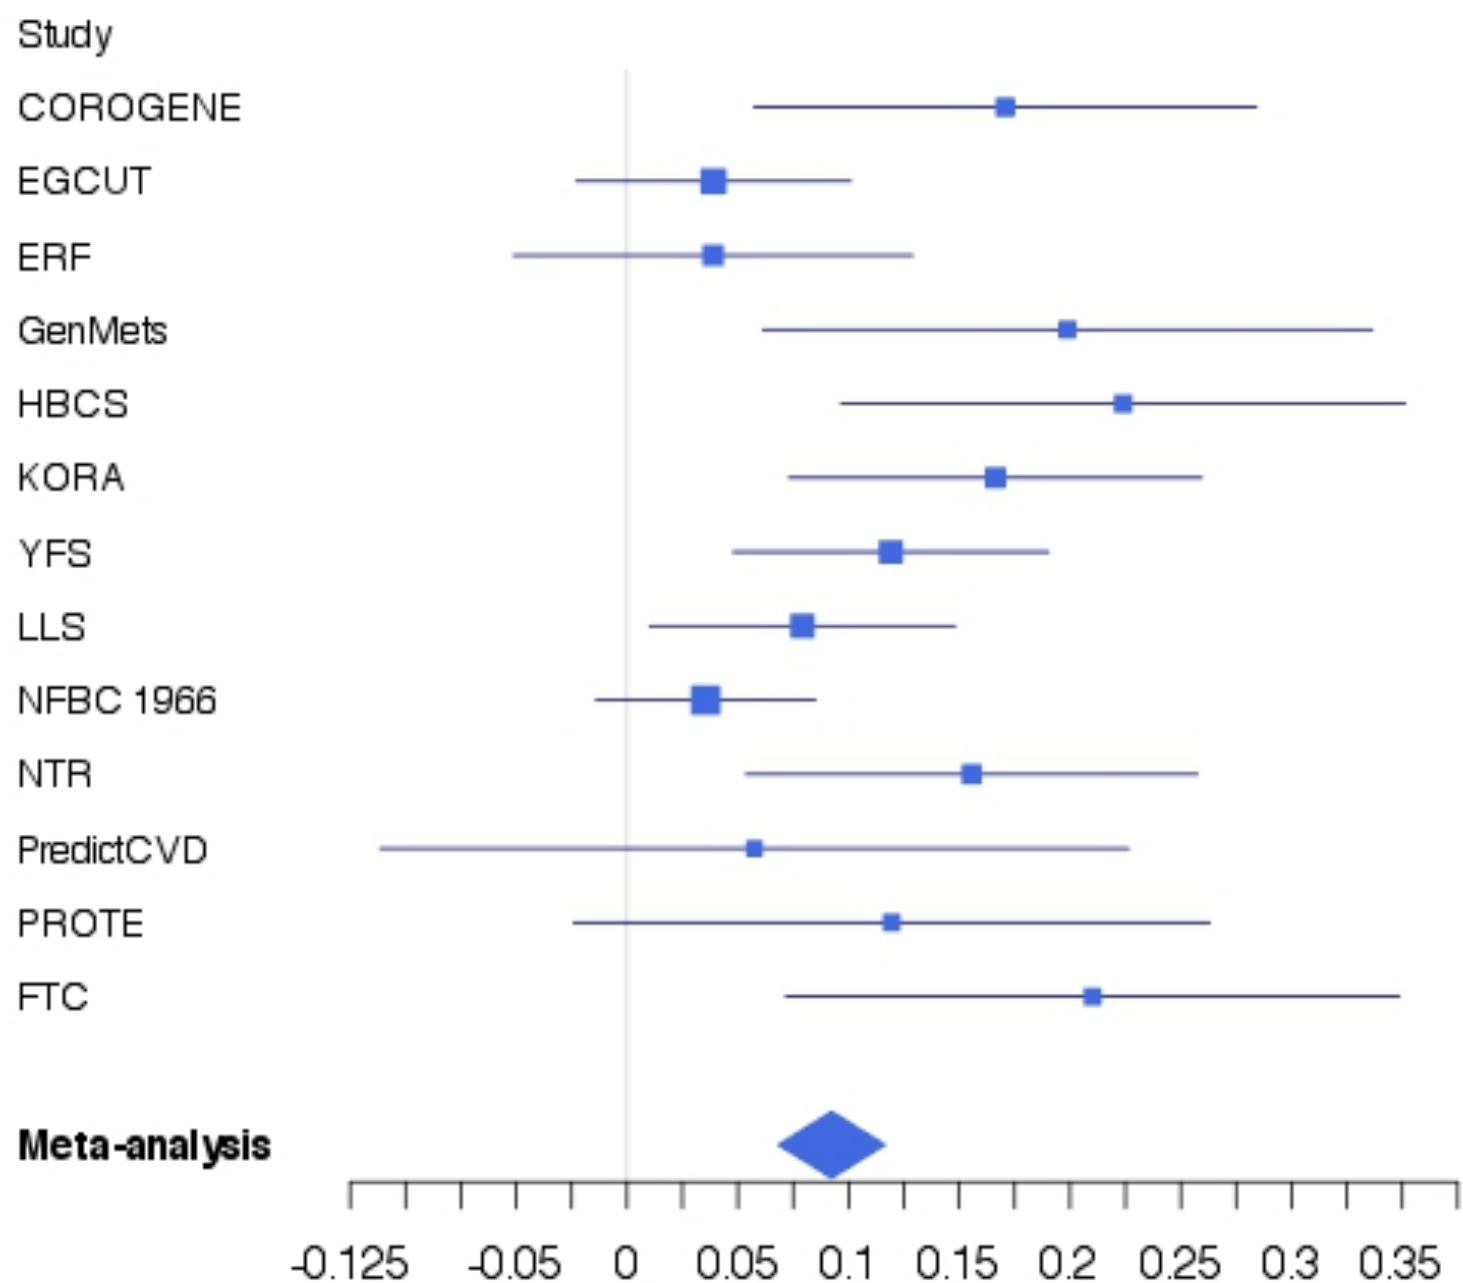

### SNP rs17145750, Chr 7, Pos 73026378, VLDL.D

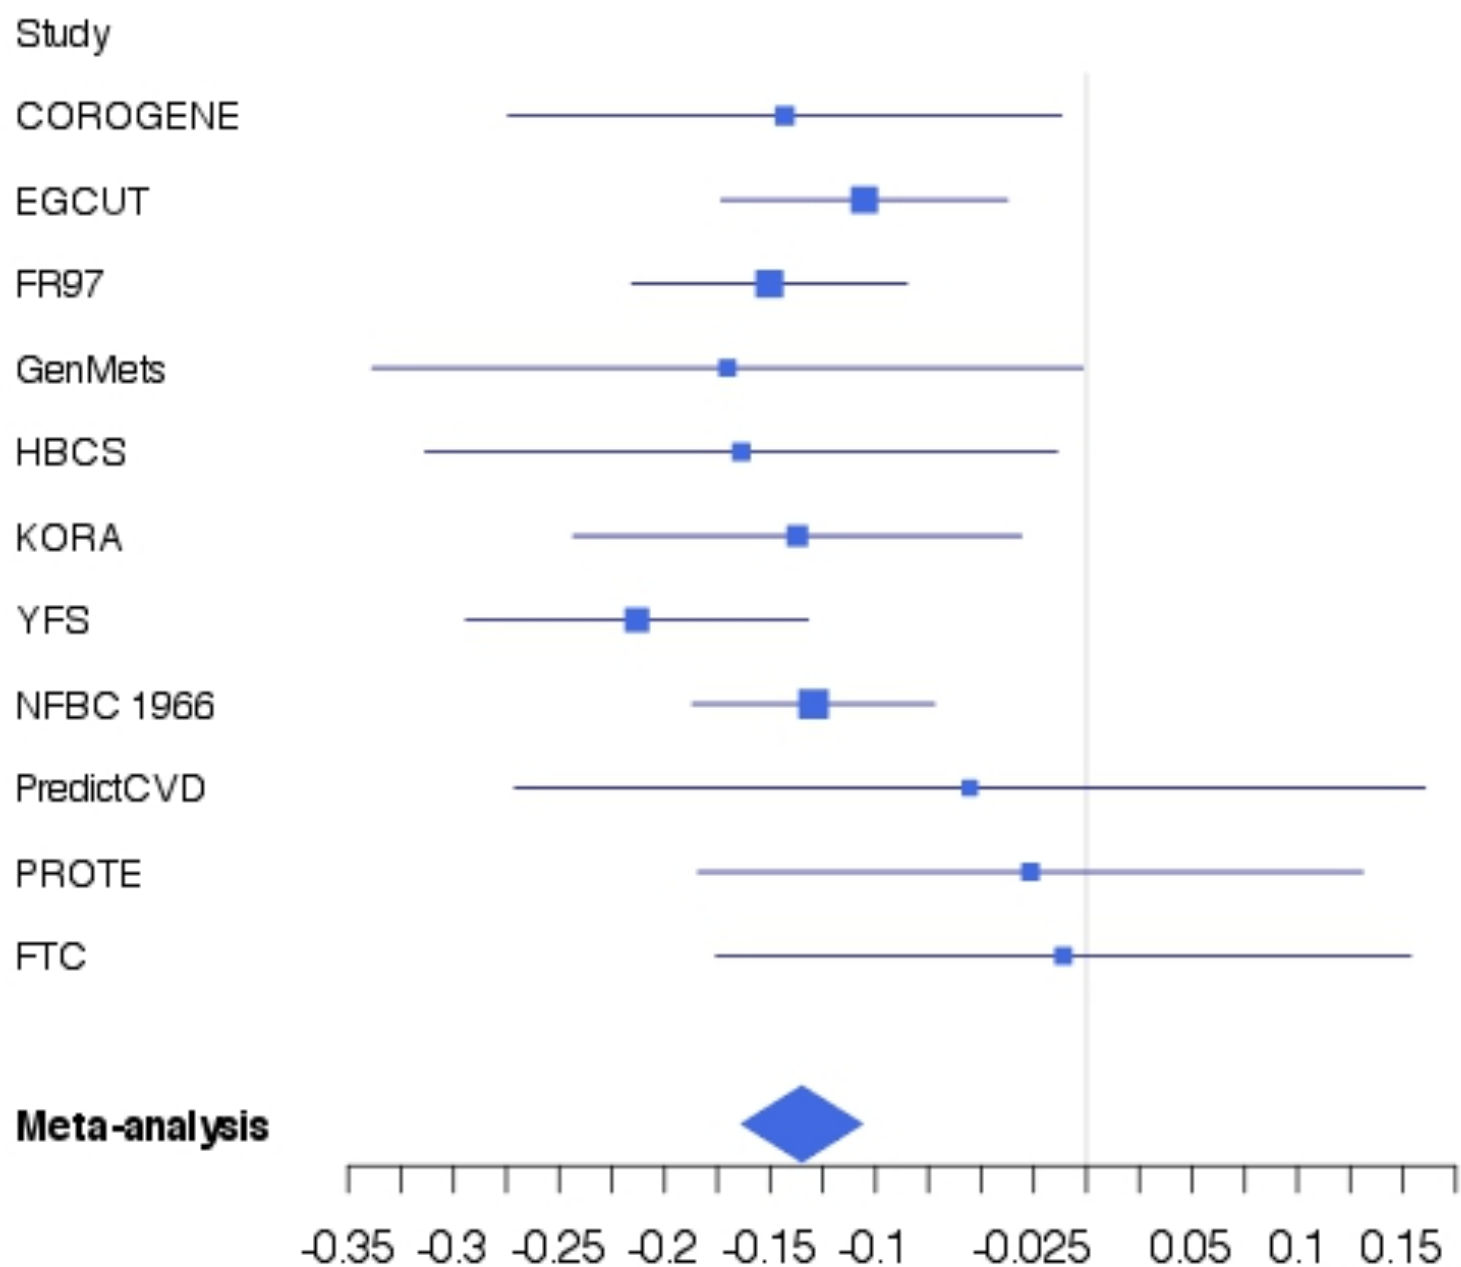



### SNP rs10265221, Chr 7, Pos 151414329, Crea

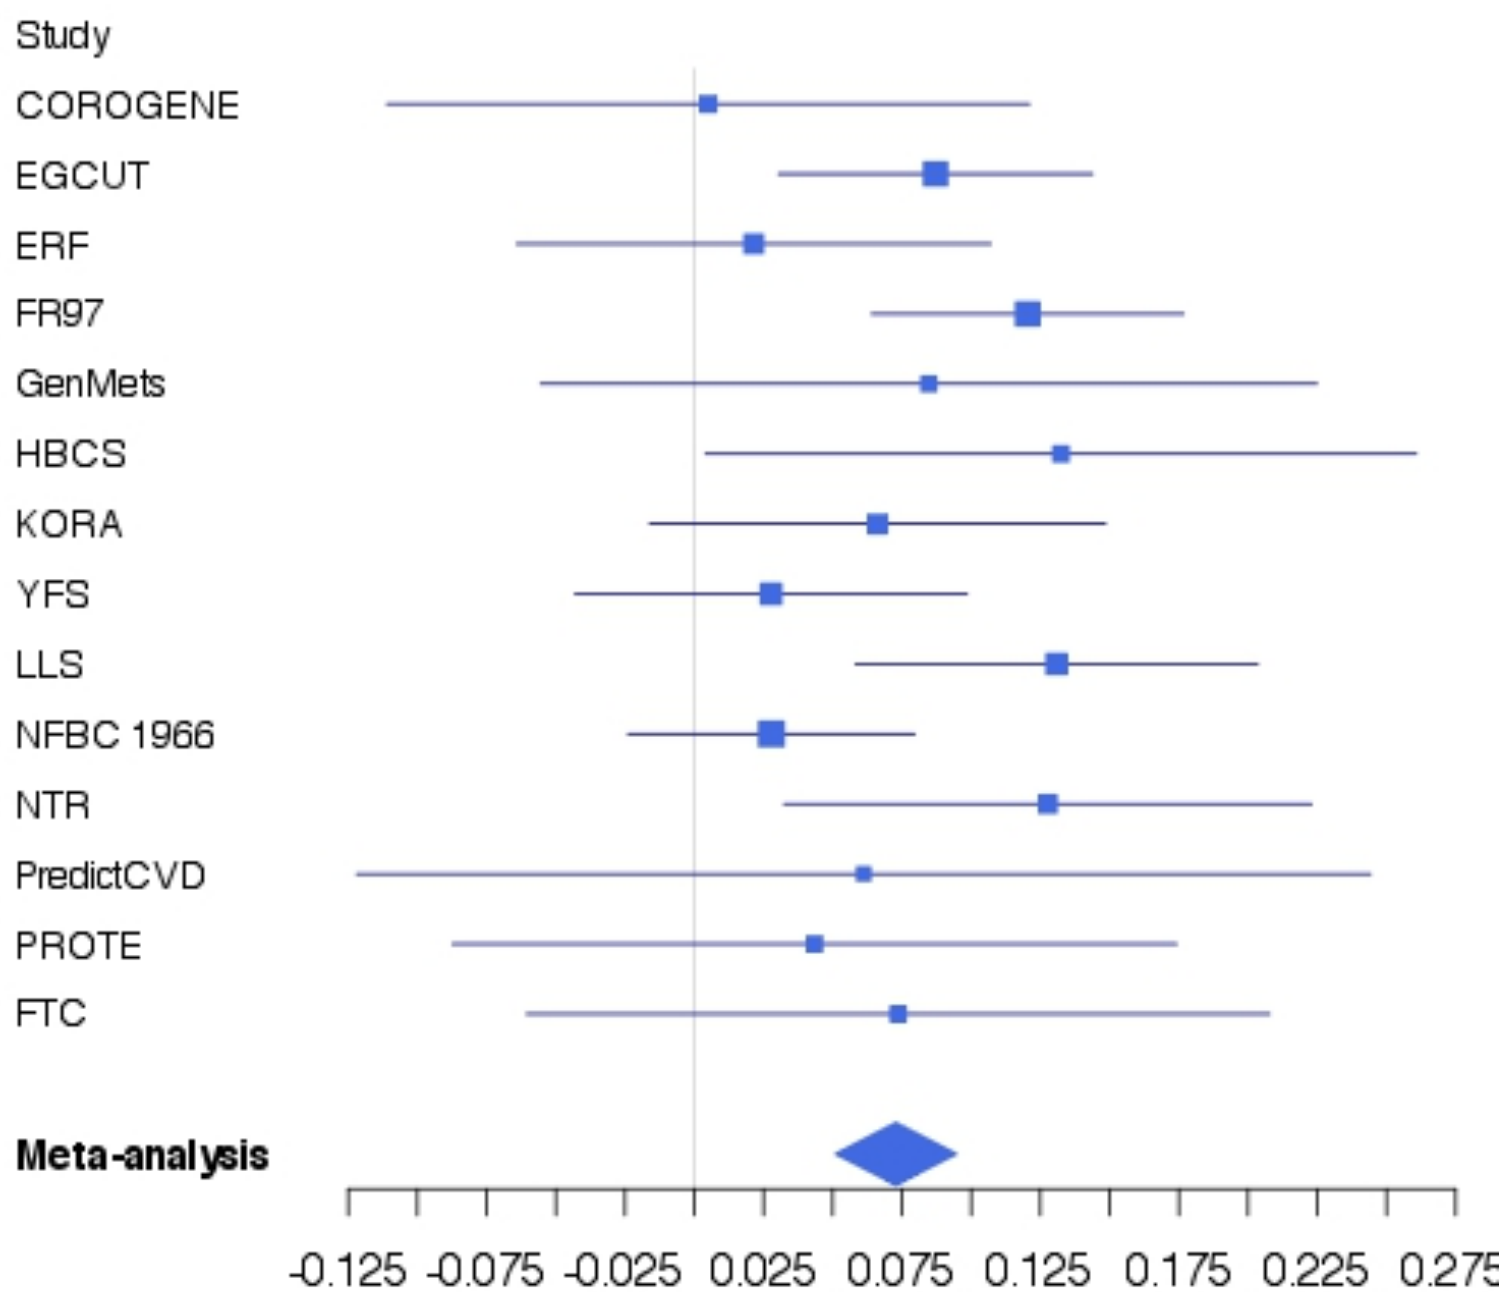

### SNP rs2169387, Chr 8, Pos 9181395, Gly

Study

COROGENE

FR97

GenMets

HBCS

KORA

YFS

LLS

NFBC 1966

NTR

PredictCVD

FTC

**Meta-analysis**

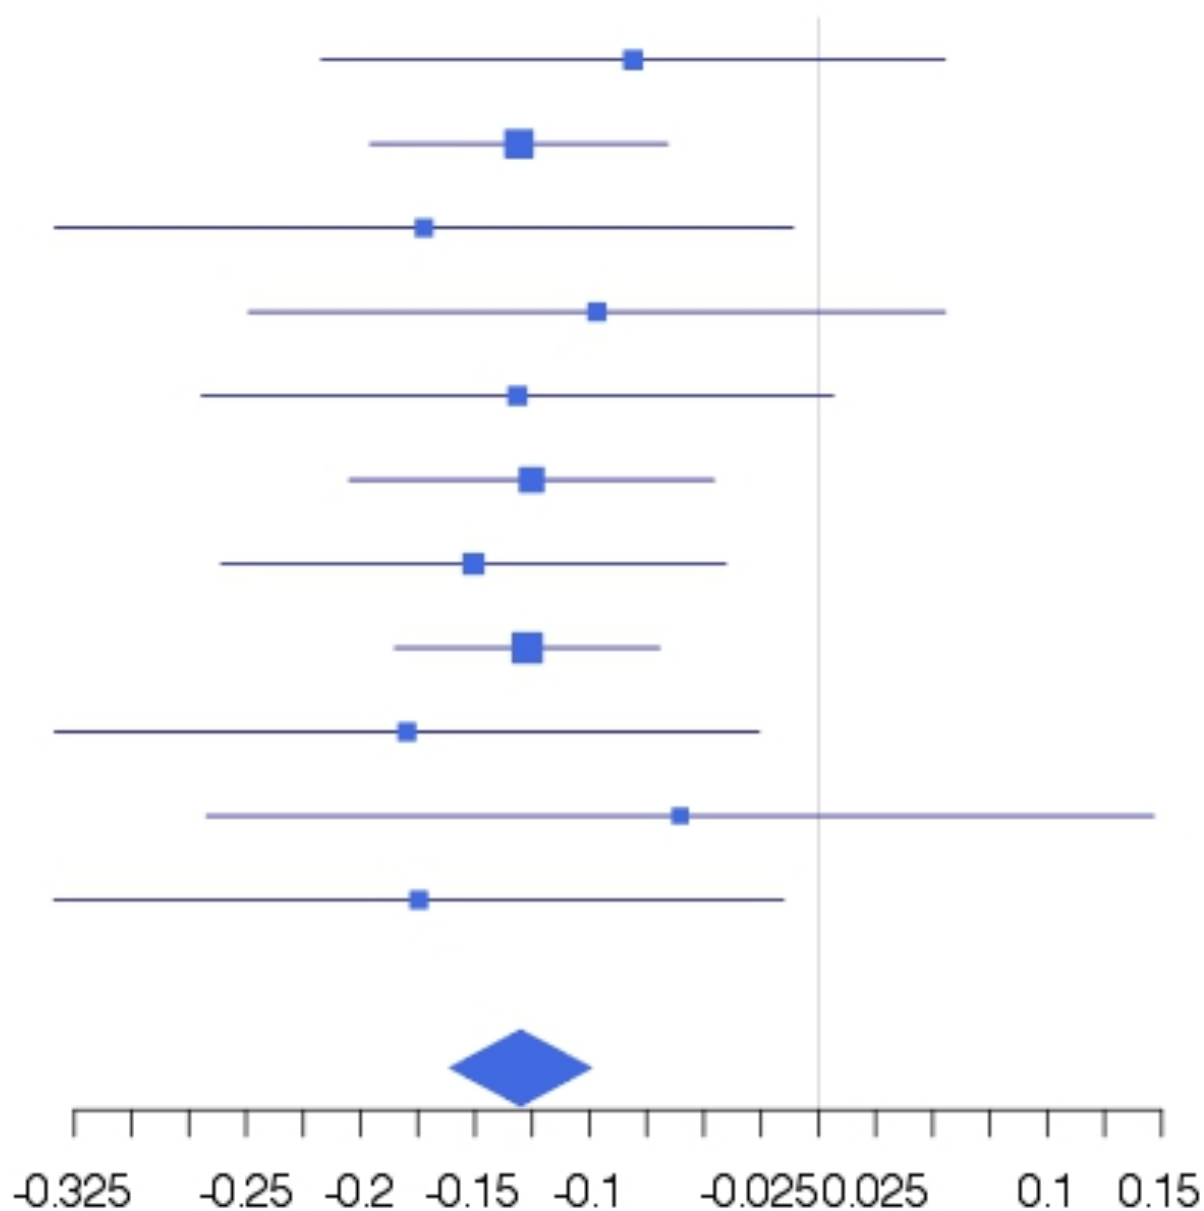

### SNP rs115849089, Chr 8, Pos 19912370, S.VLDL.TG

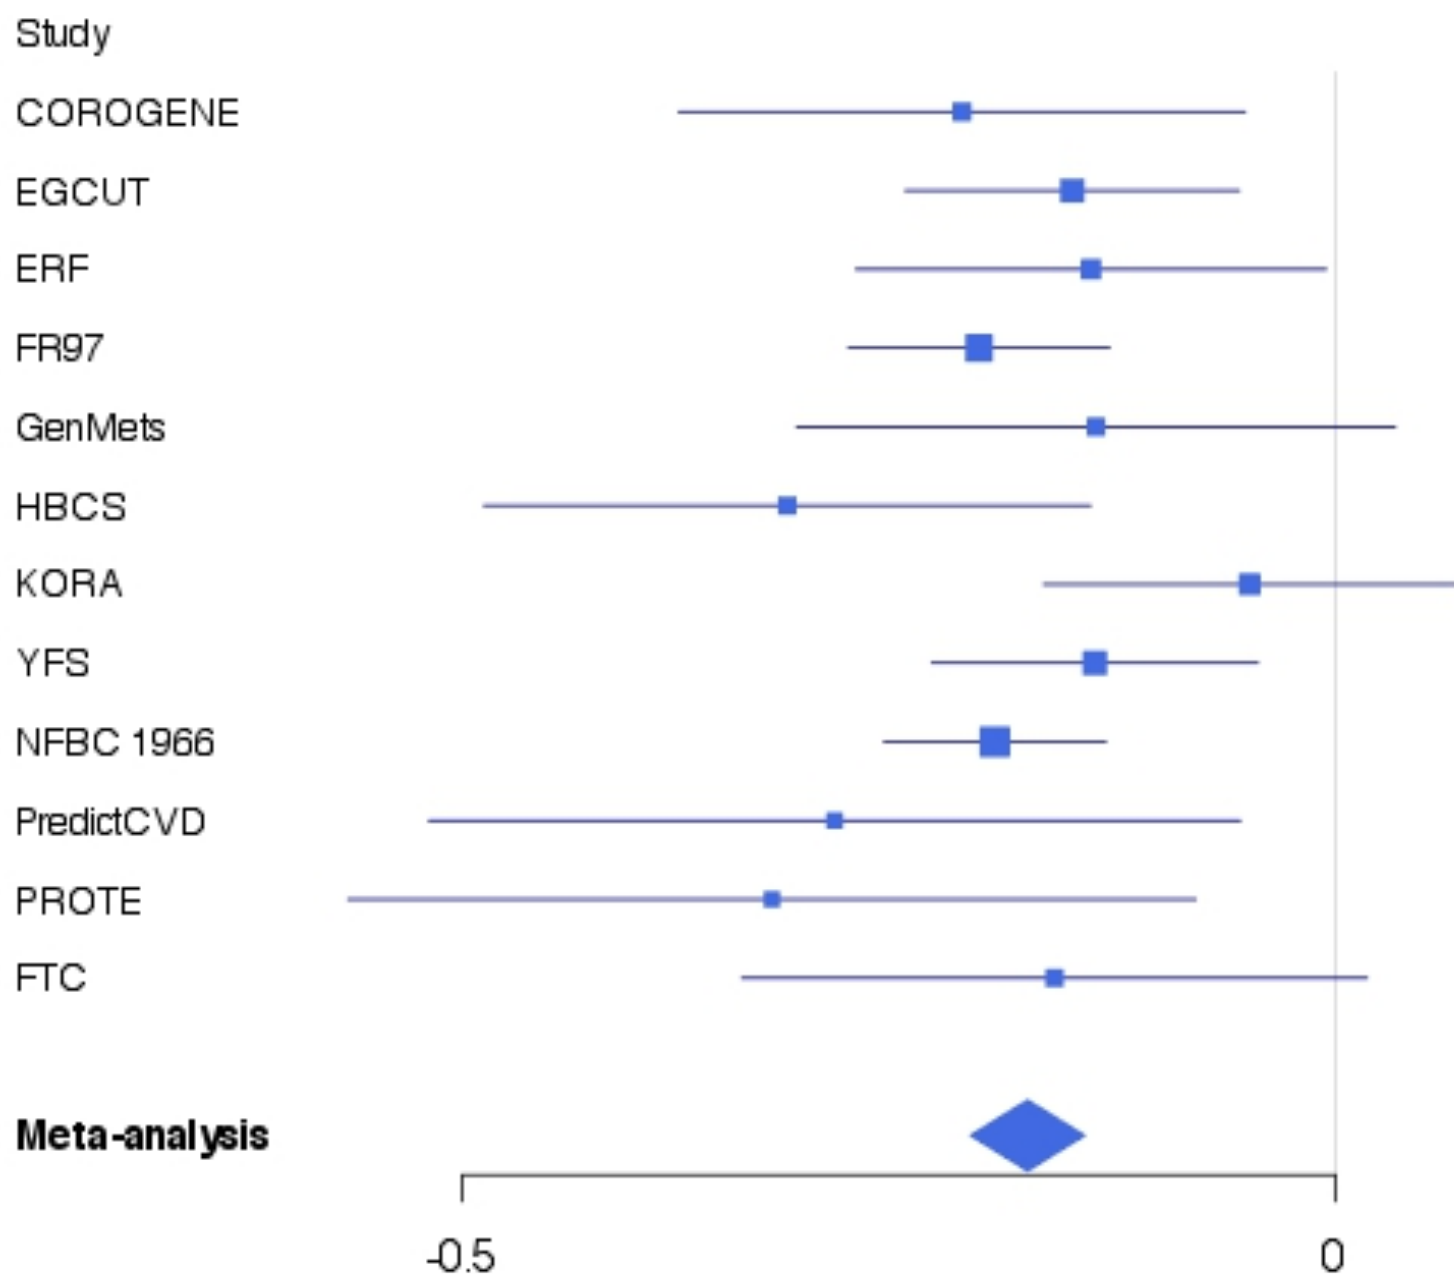

### SNP rs2954029, Chr 8, Pos 126490972, XS.VLDL.TG

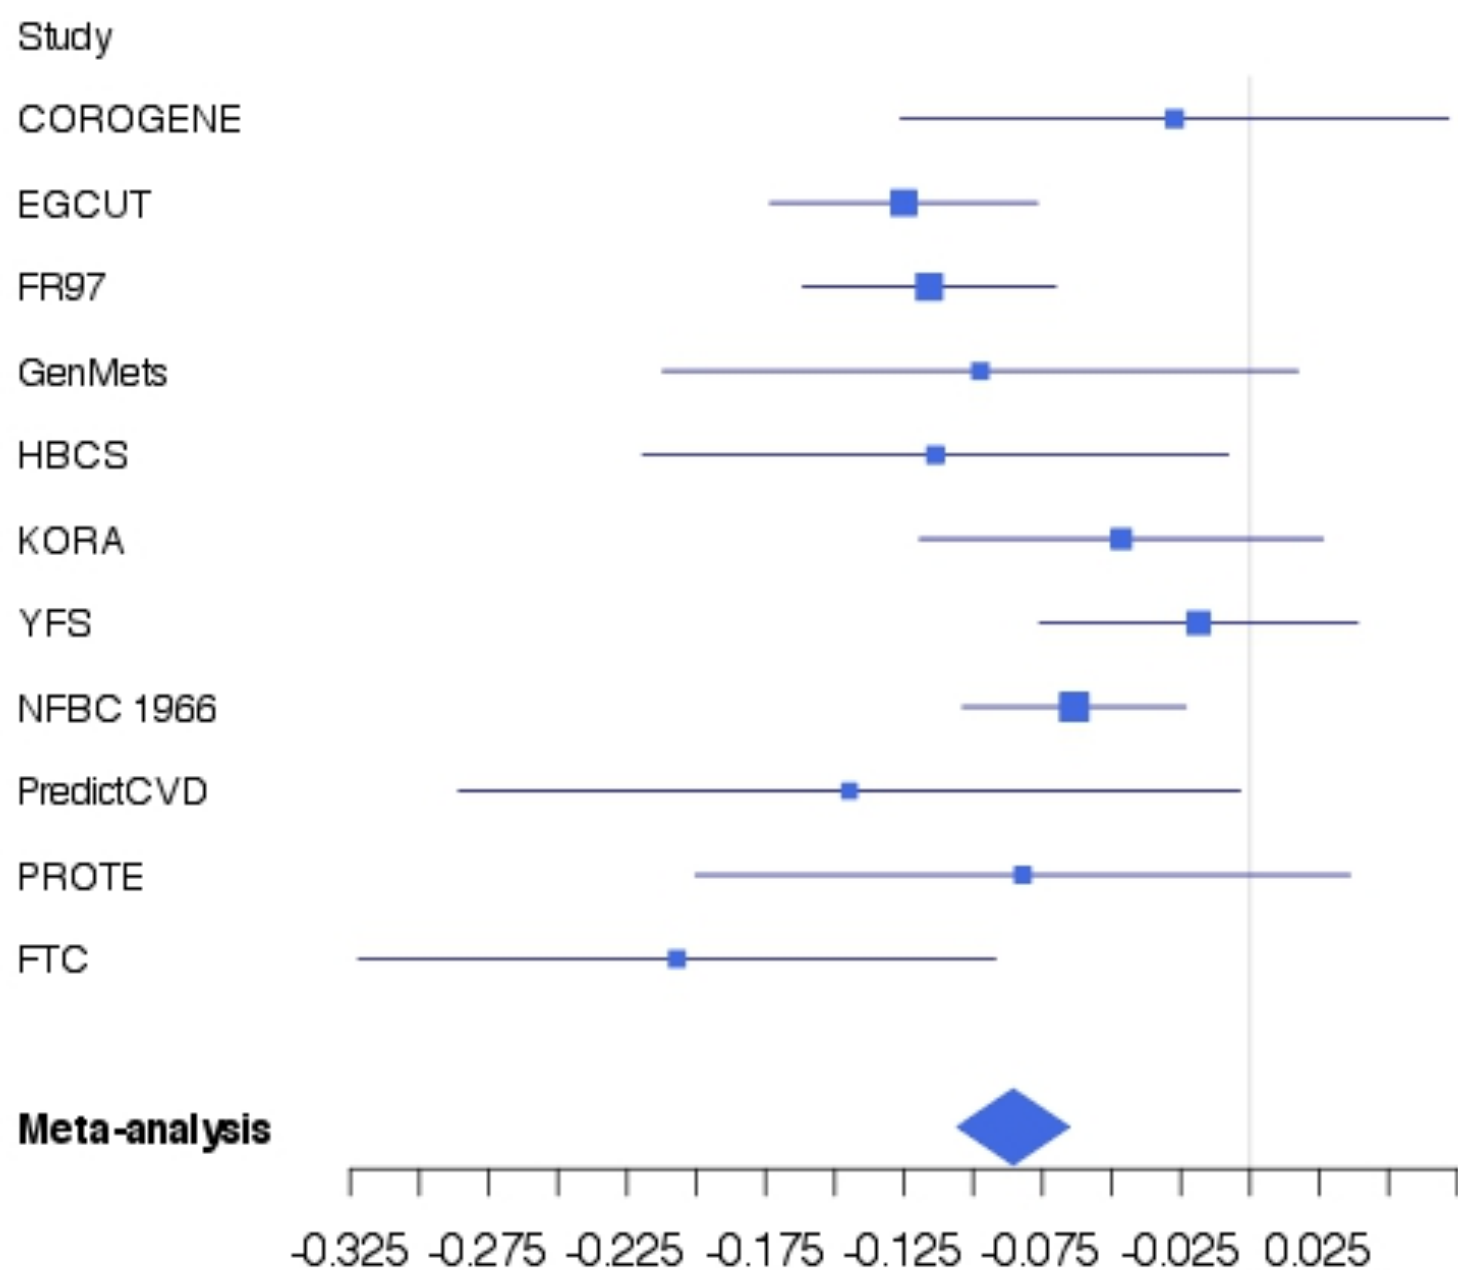

### SNP chr9:5877295:I, Chr 9, Pos 5877295, Gly

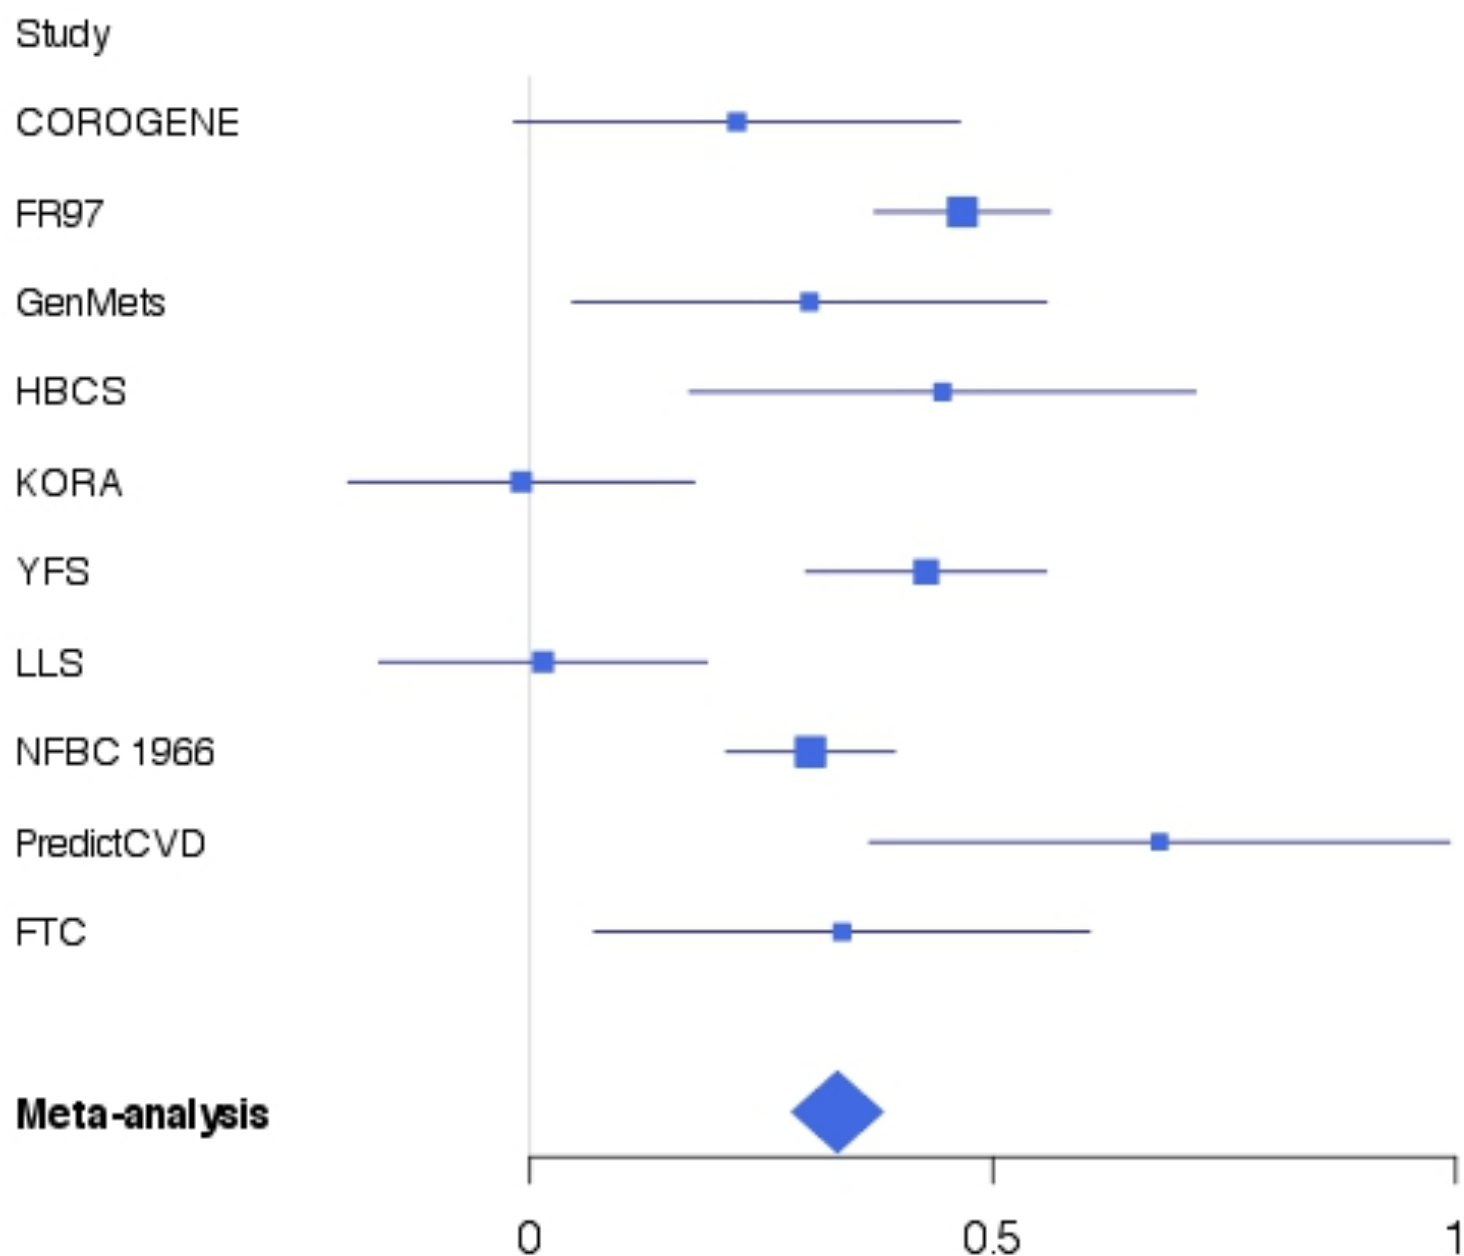

### SNP rs686030, Chr 9, Pos 15304782, XL.HDL.FC

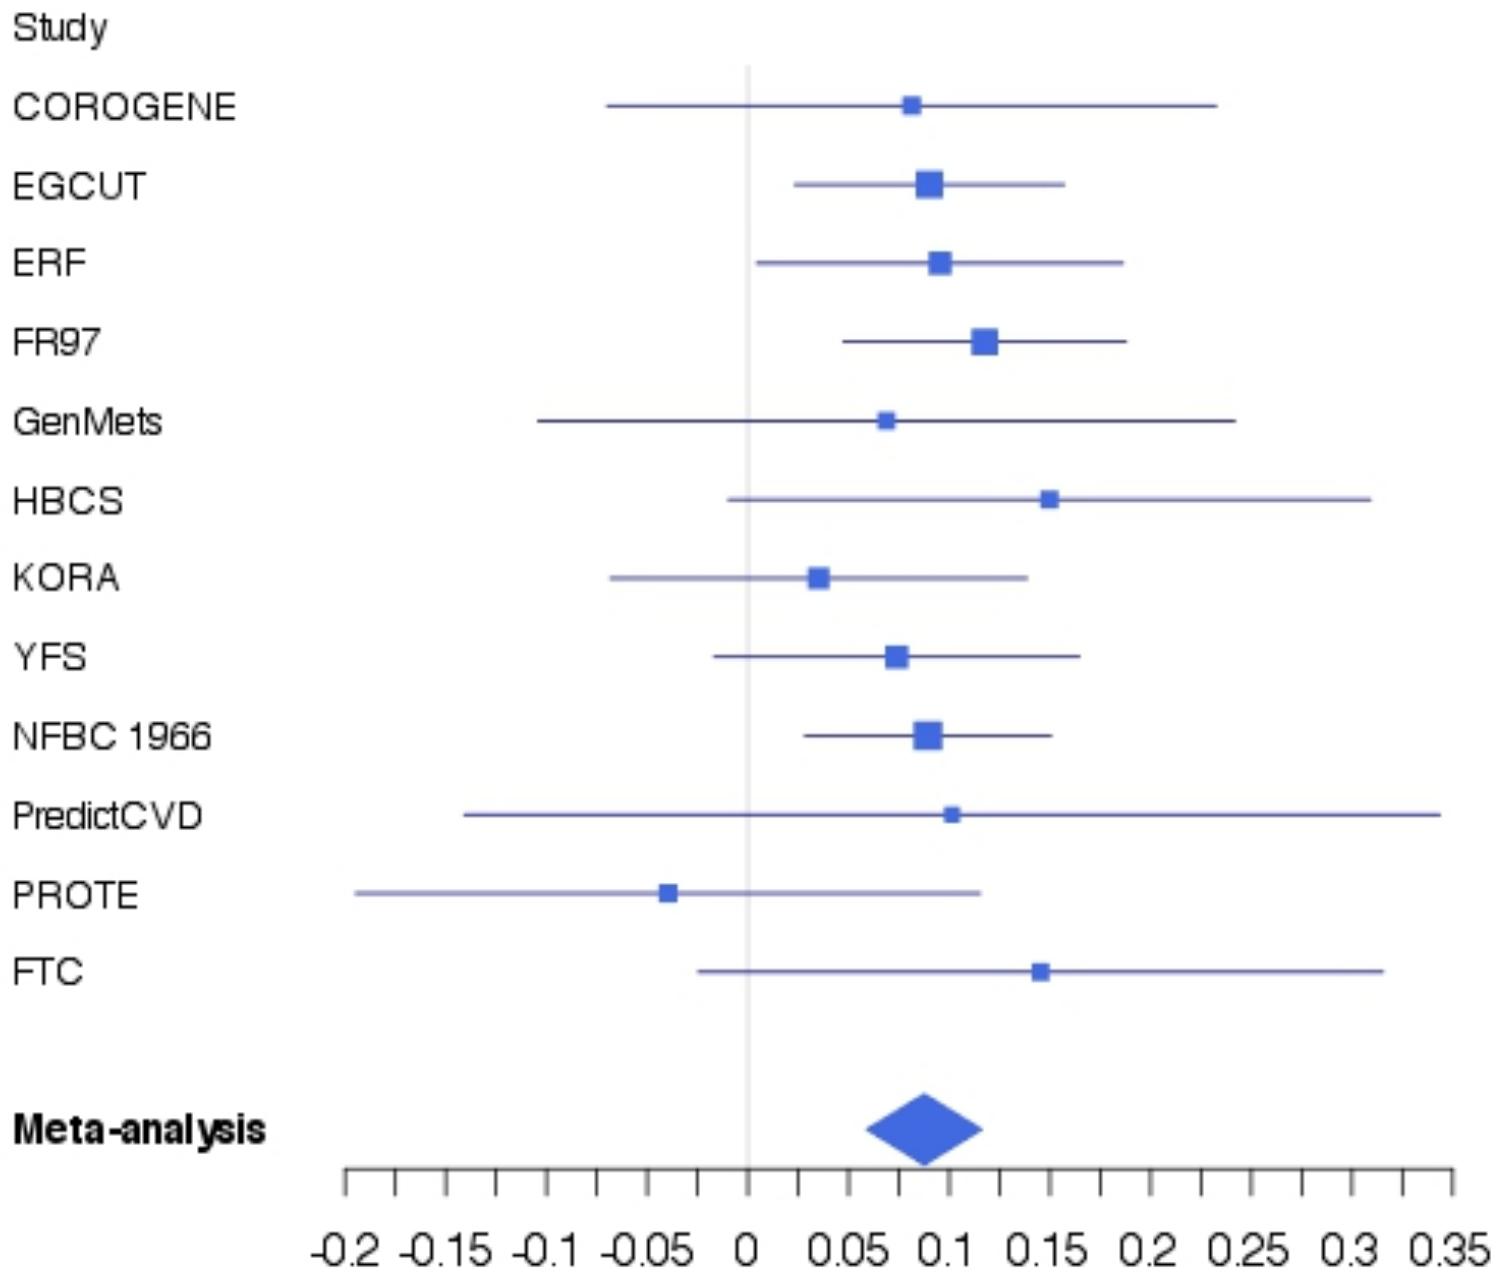

### SNP rs2575876, Chr 9, Pos 107665739, XL.HDL.C

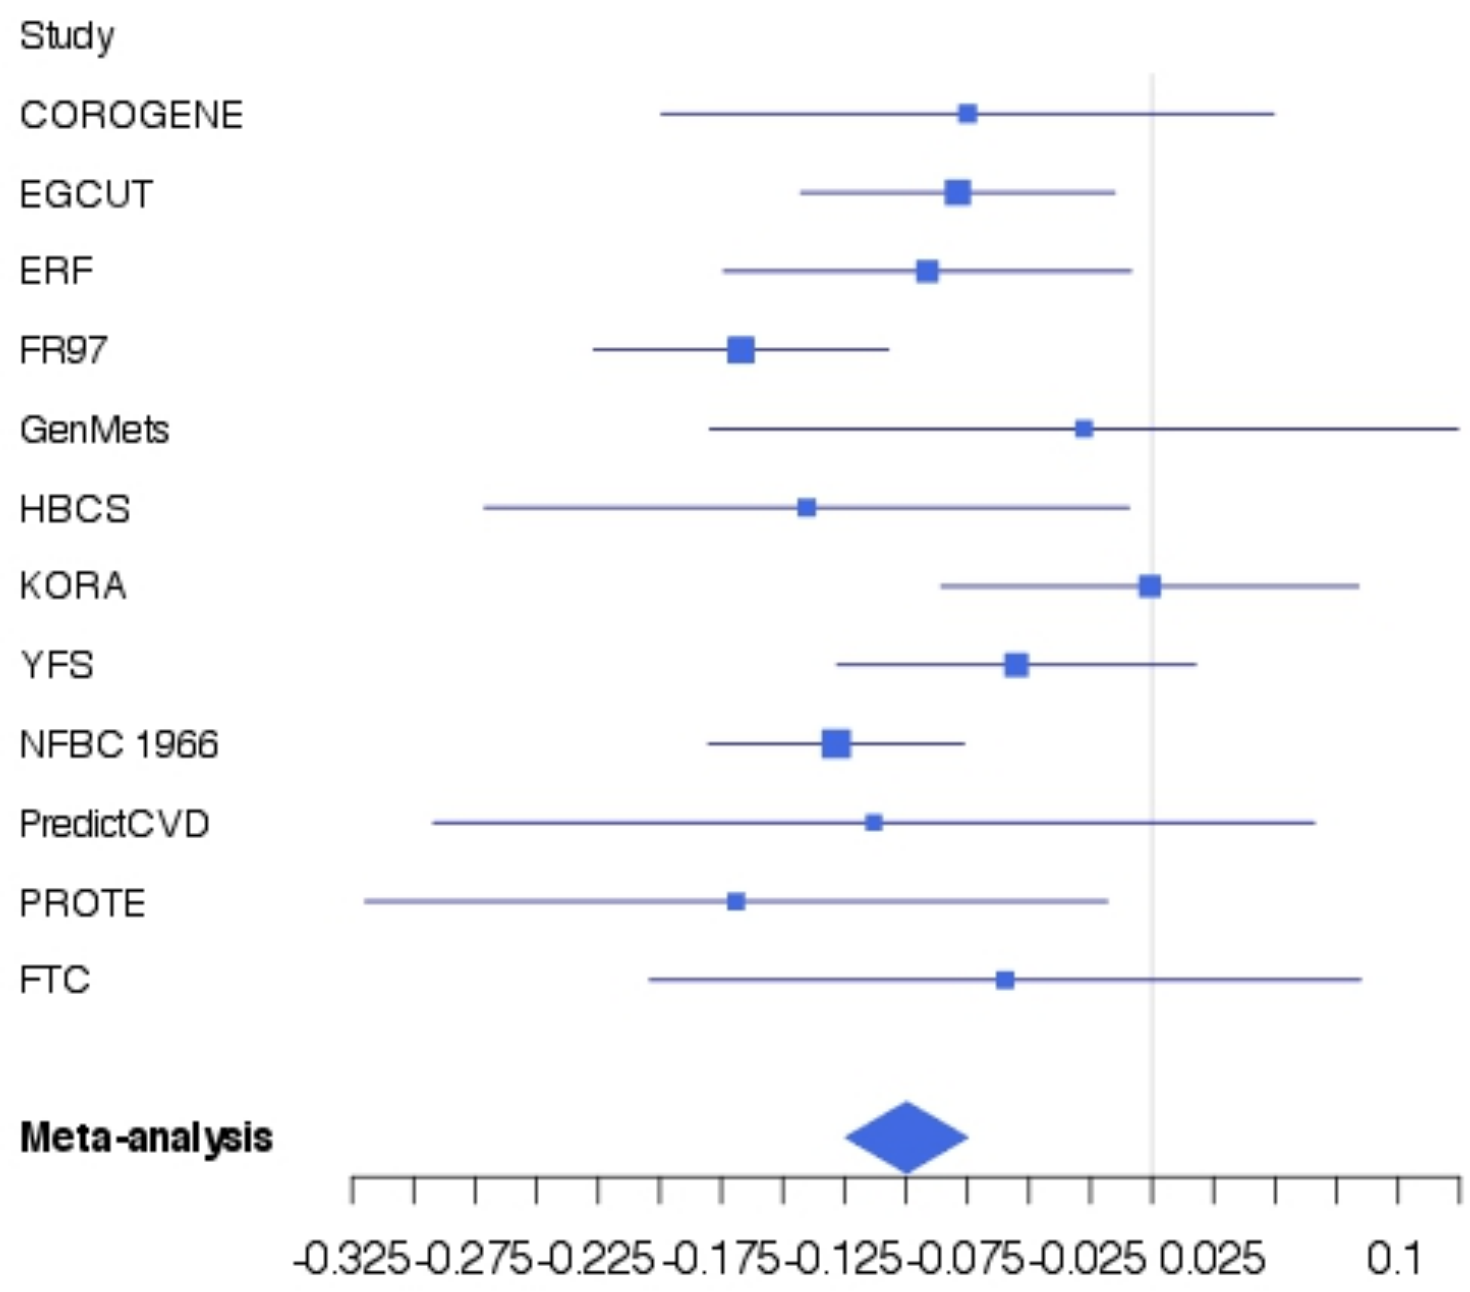

### SNP chr9:136149709:D, Chr 9, Pos 136149709, IDL.L

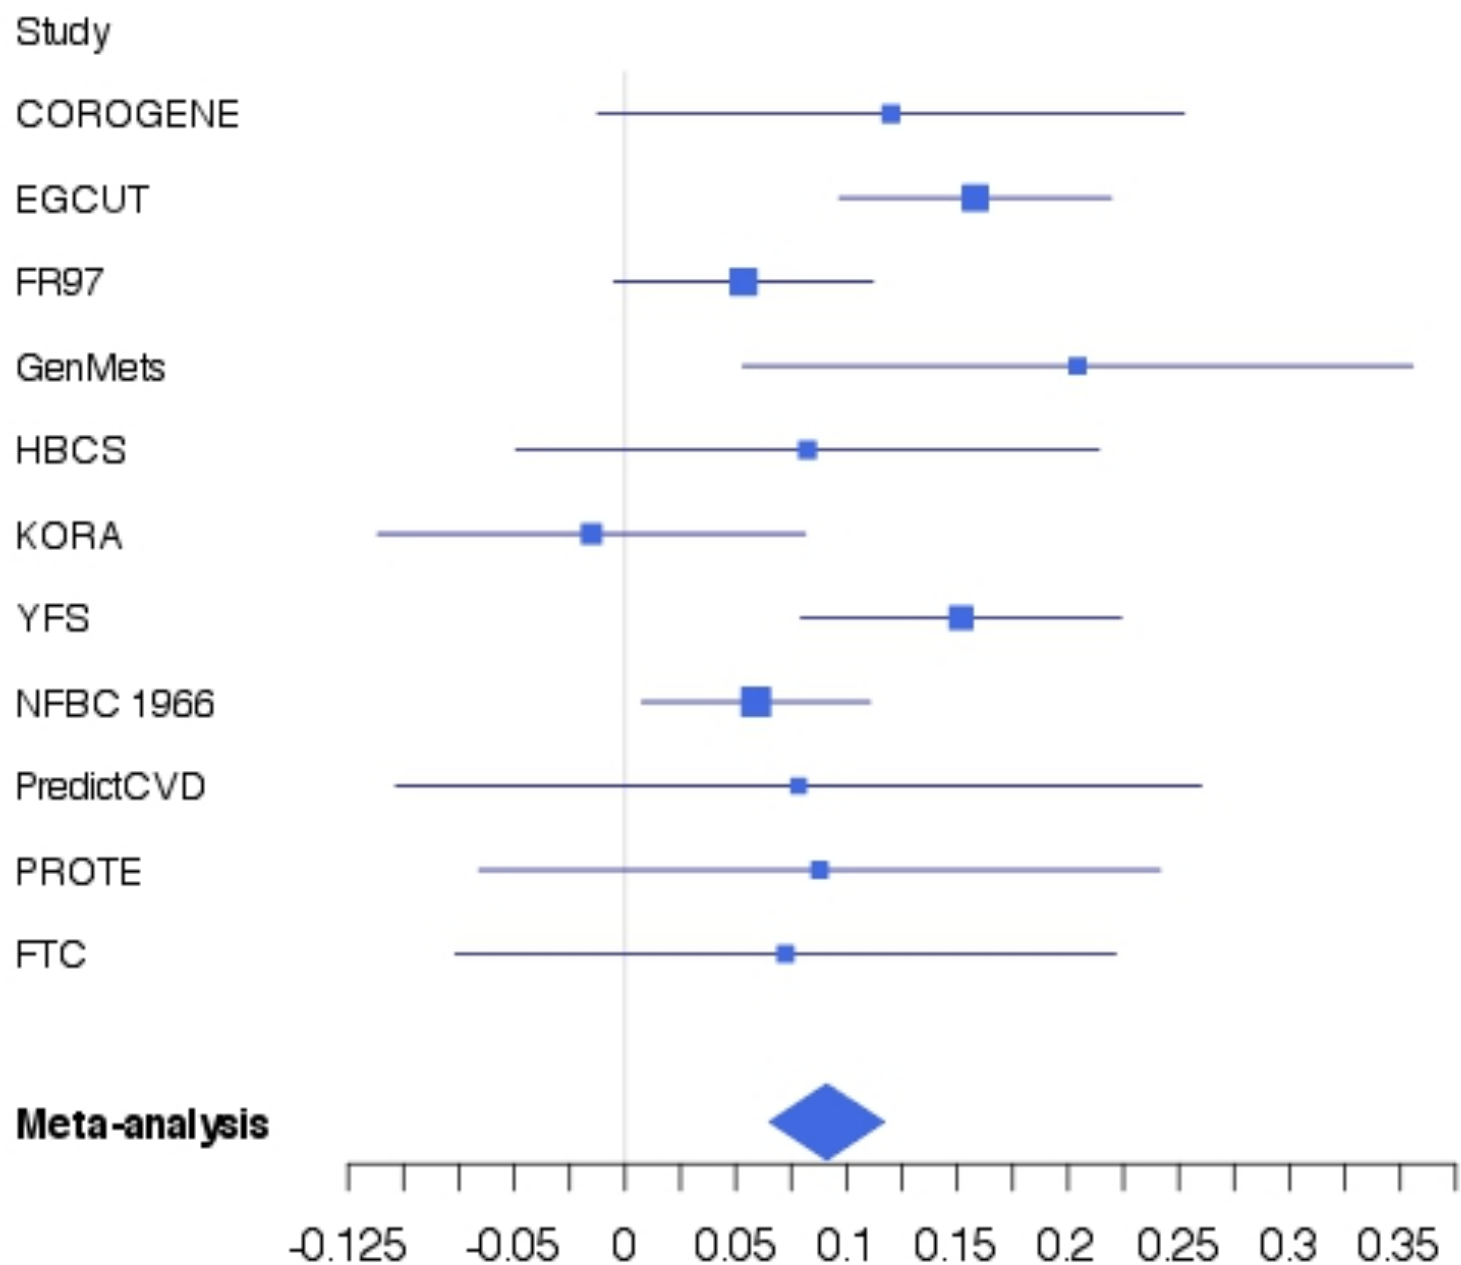



### SNP rs7078003, Chr 10, Pos 99359412, Gln

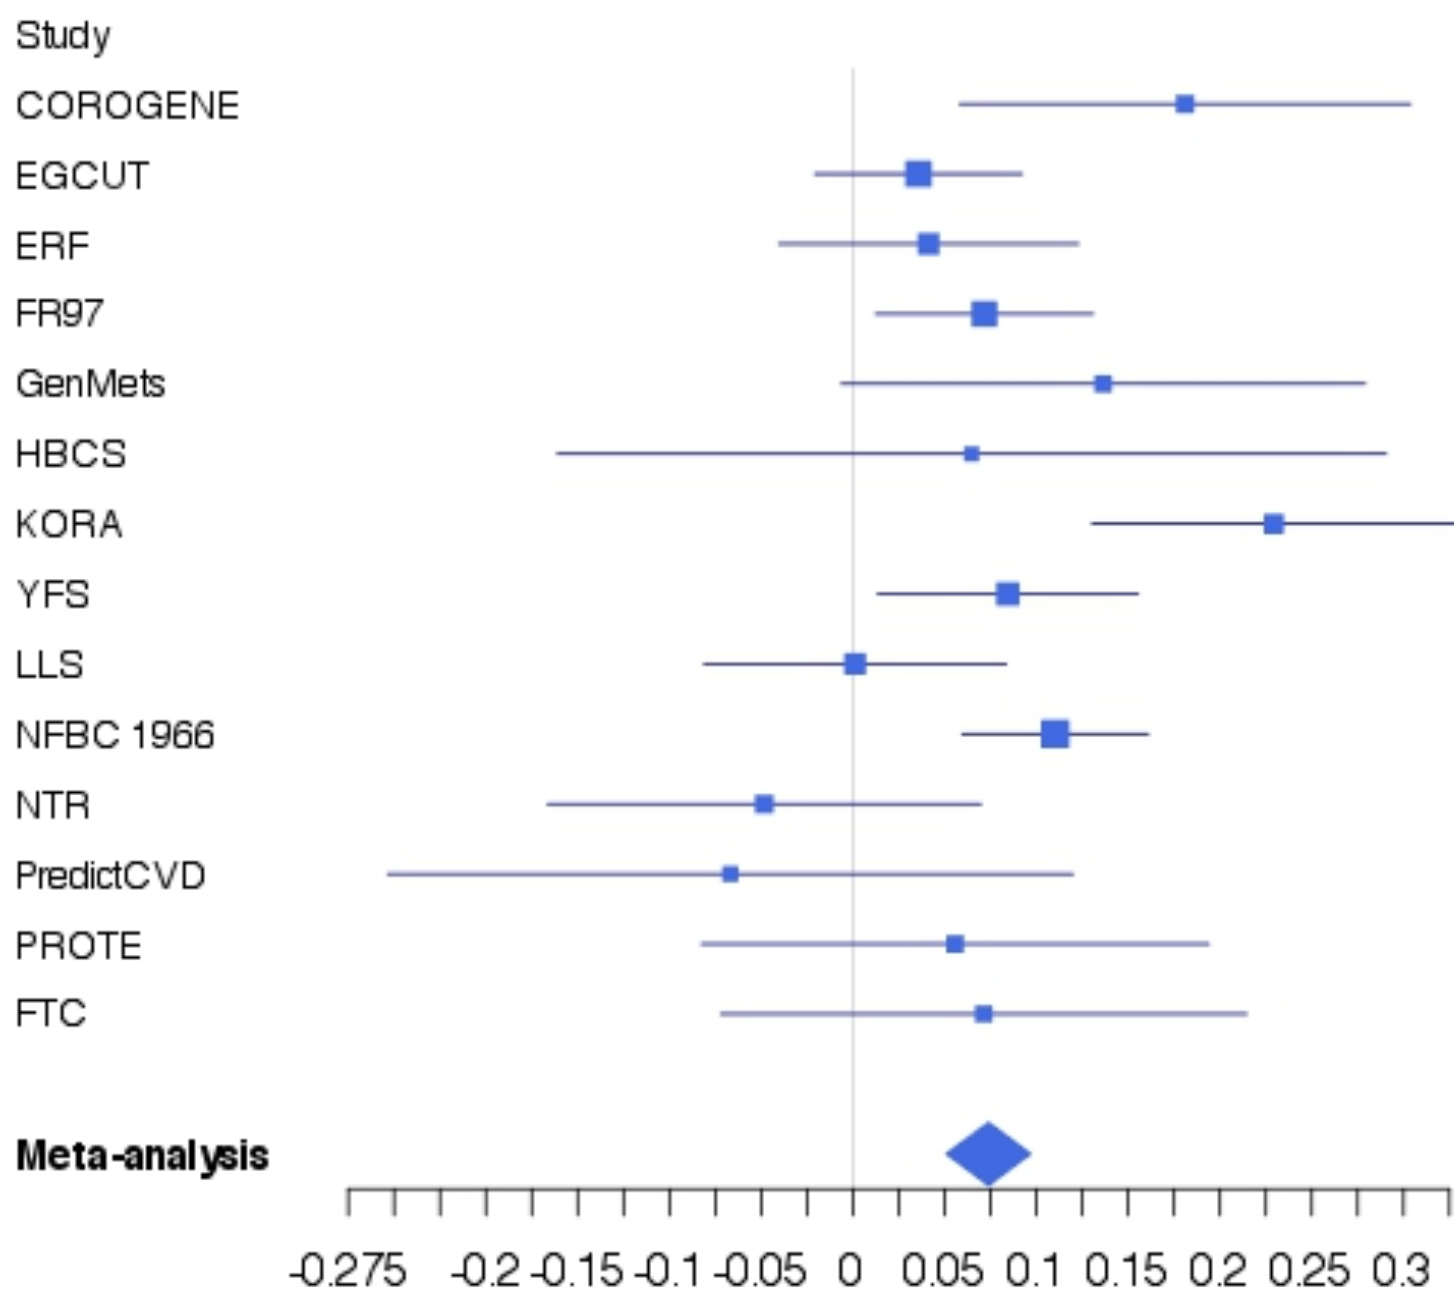

### SNP rs174547, Chr 11, Pos 61570783, otPUFA

Study

COROGENE

FR97

GenMets

HBCS

KORA

YFS

NFBC 1966

PredictCVD

PROTE

FTC

**Meta-analysis**

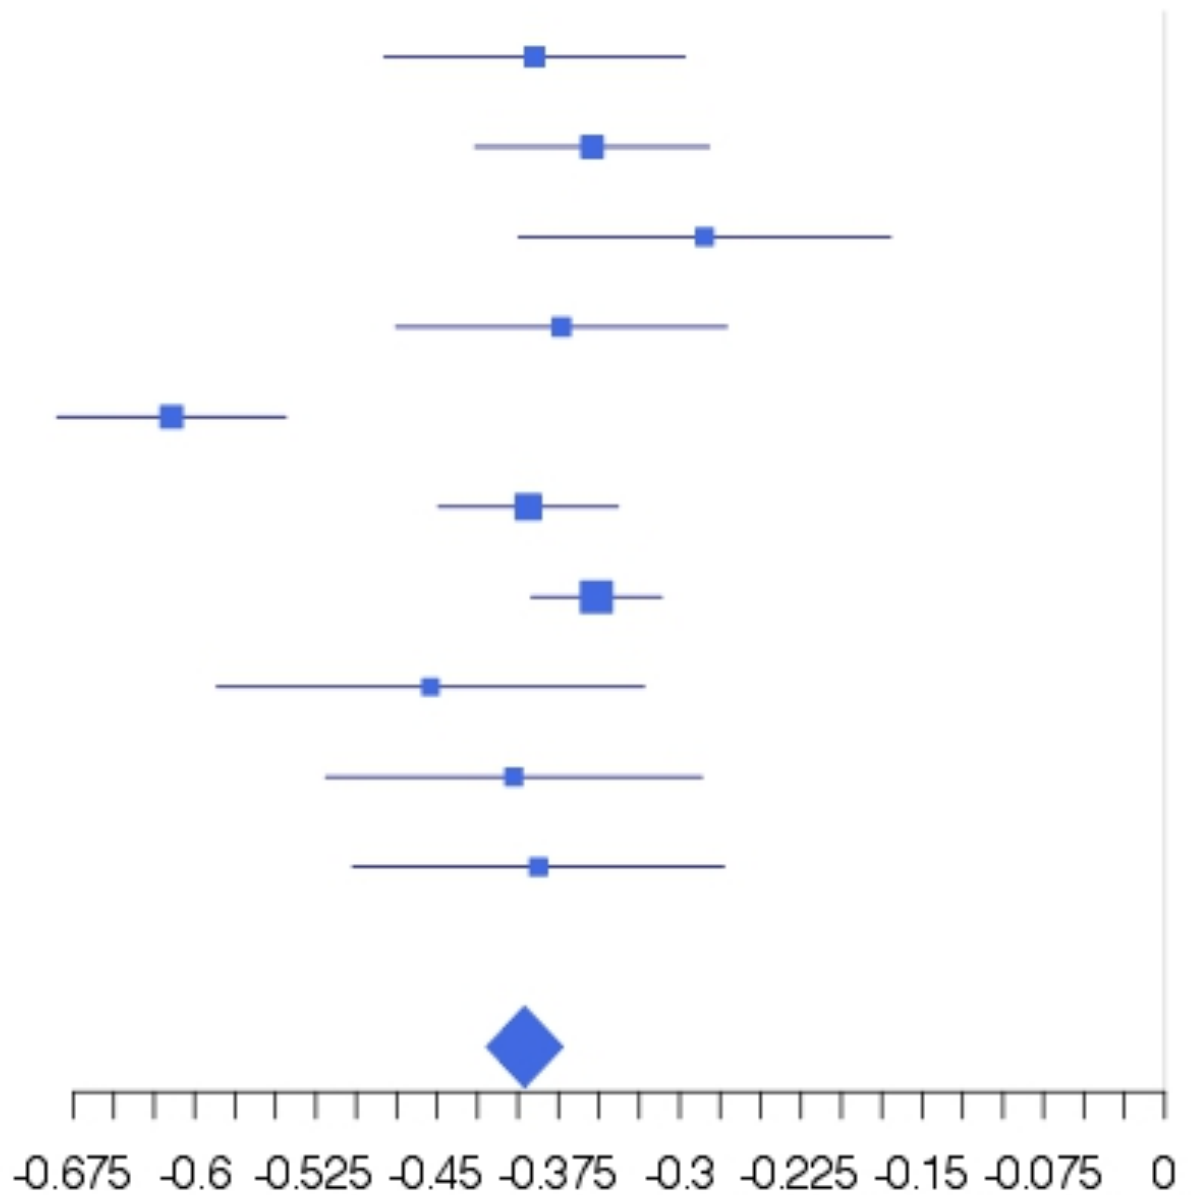

### SNP rs186183604, Chr 11, Pos 67128733, otPUFA

Study

COROGENE

FR97

GenMets

HBCS

KORA

YFS

NFBC 1966

PredictCVD

PROTE

FTC

**Meta-analysis**

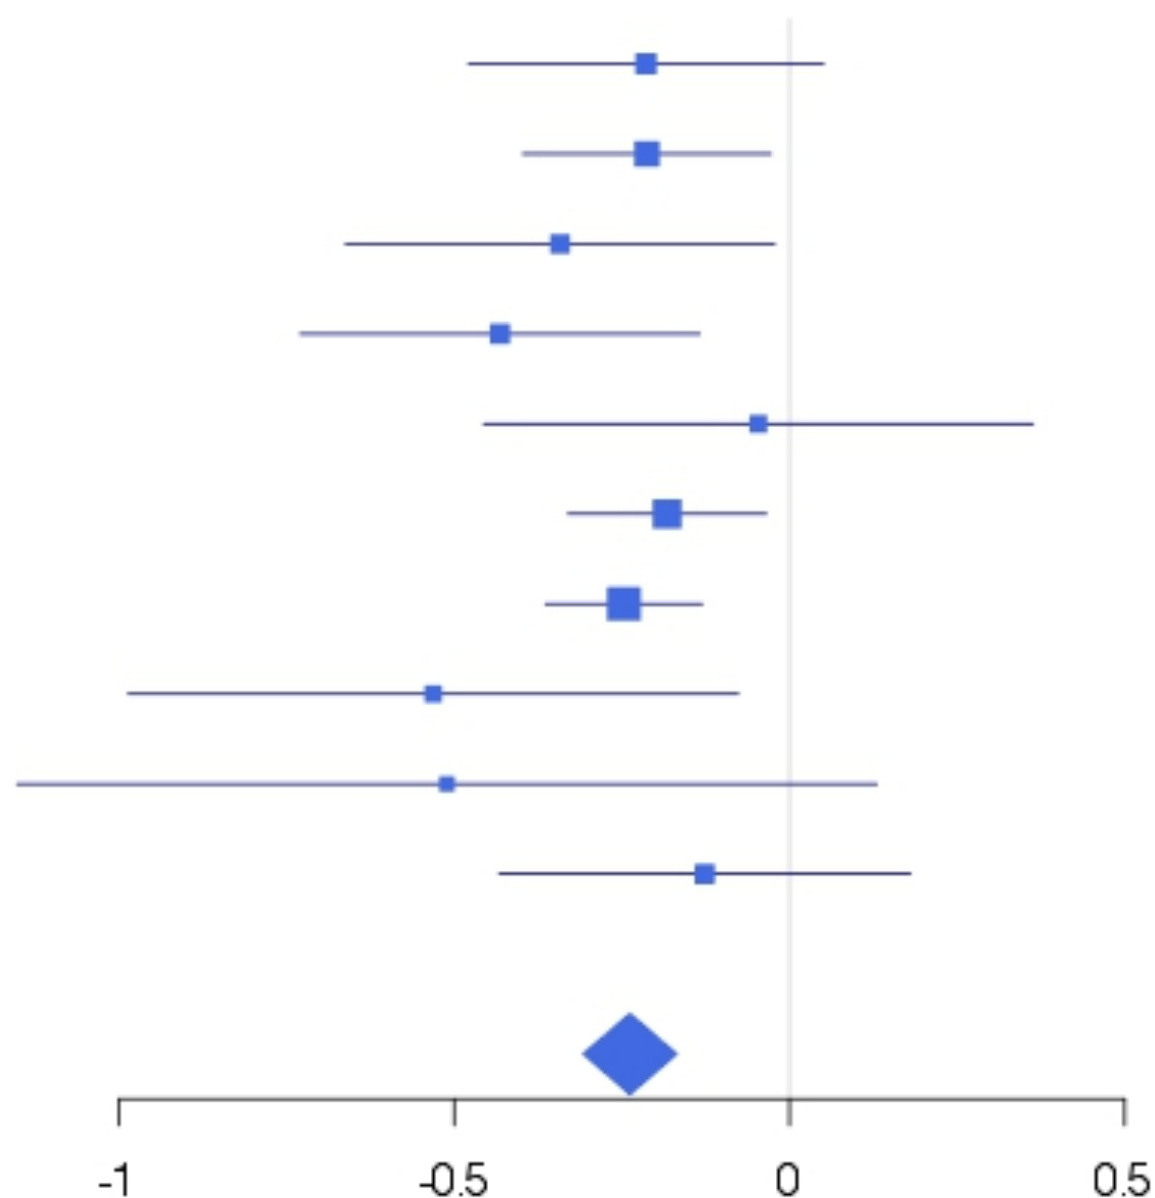

### SNP rs10466351, Chr 11, Pos 92697981, Glc

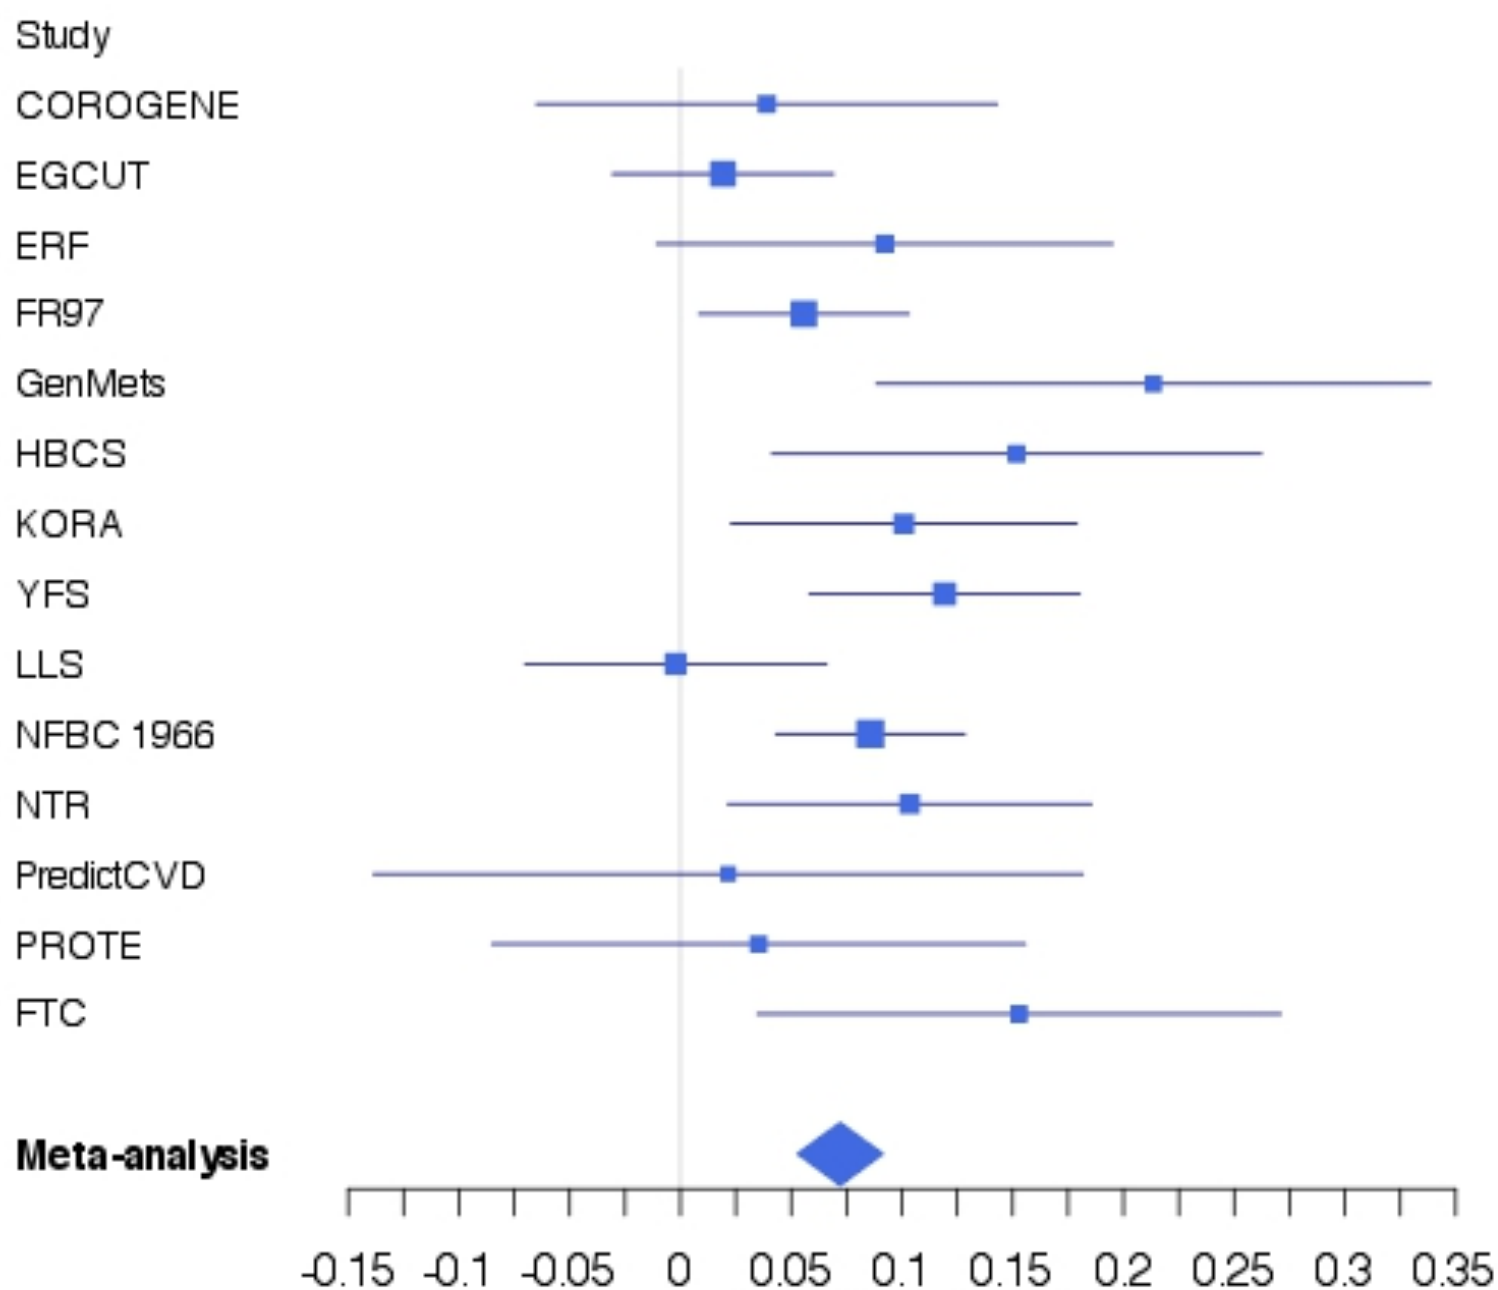

### SNP rs964184, Chr 11, Pos 116648917, S.VLDL.TG

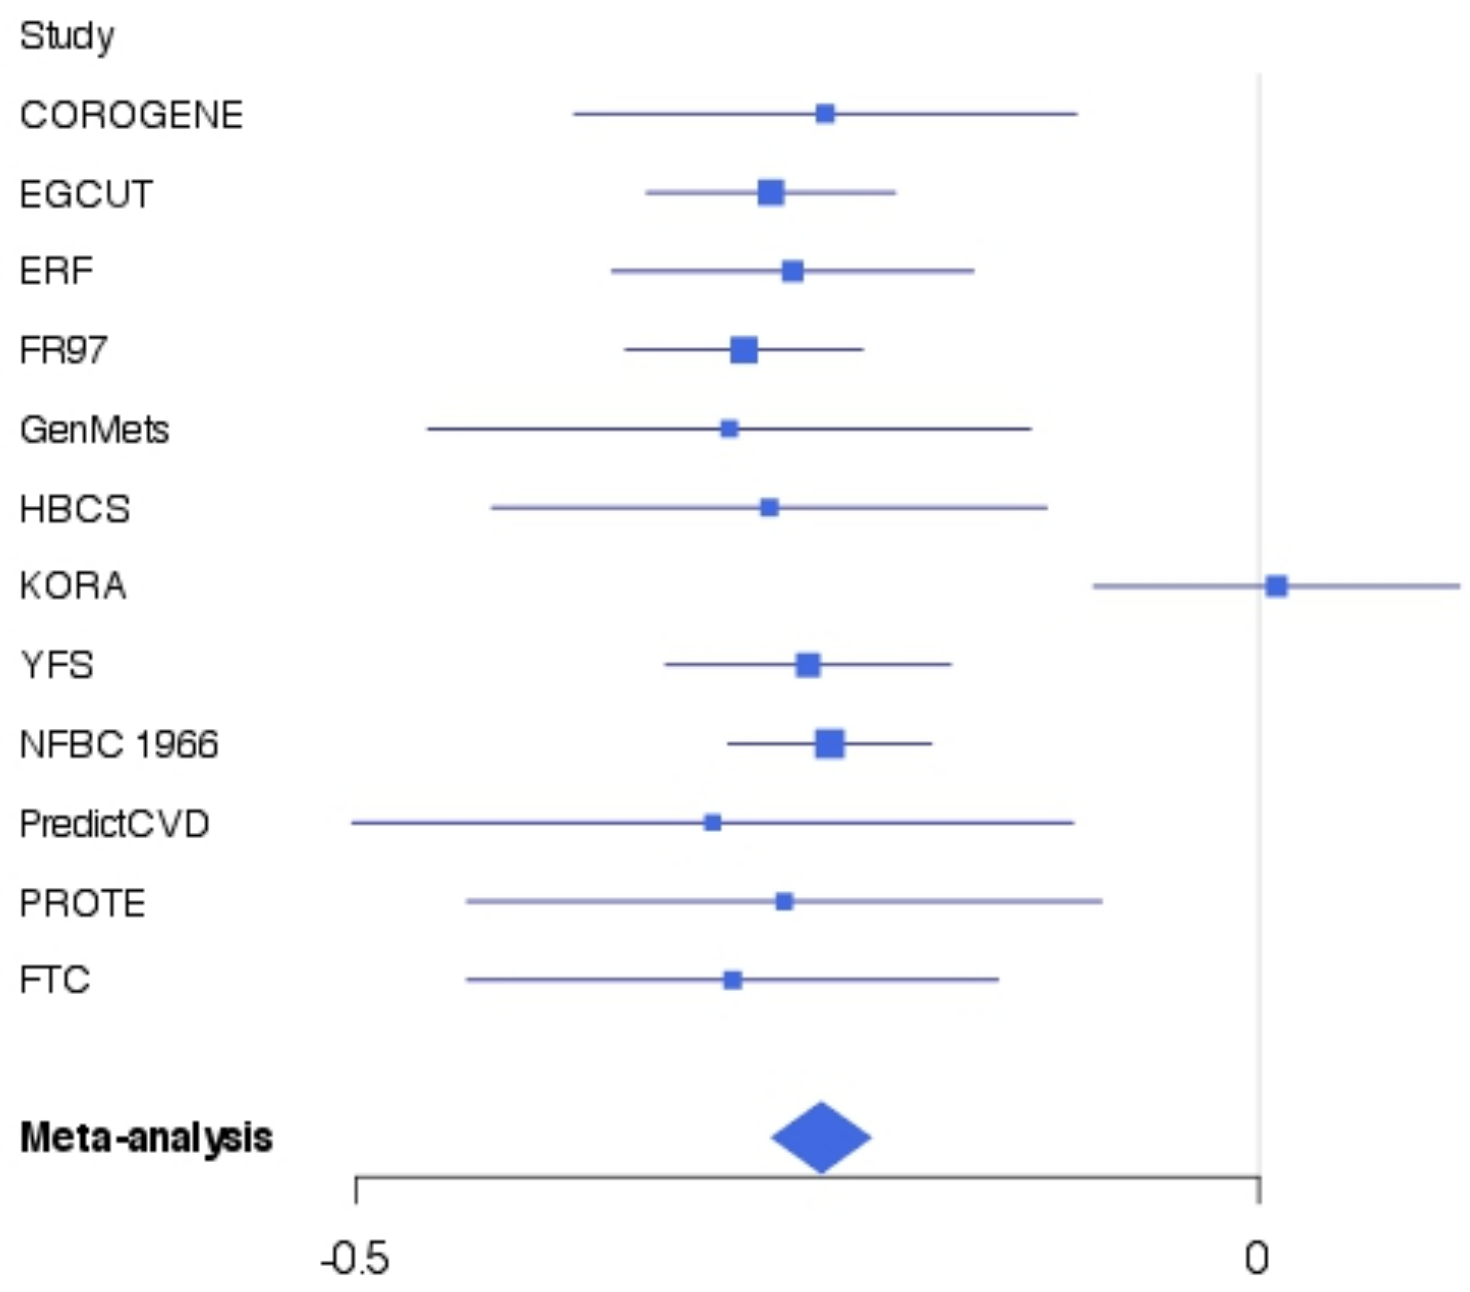

### SNP rs4554975, Chr 12, Pos 47201814, Ala

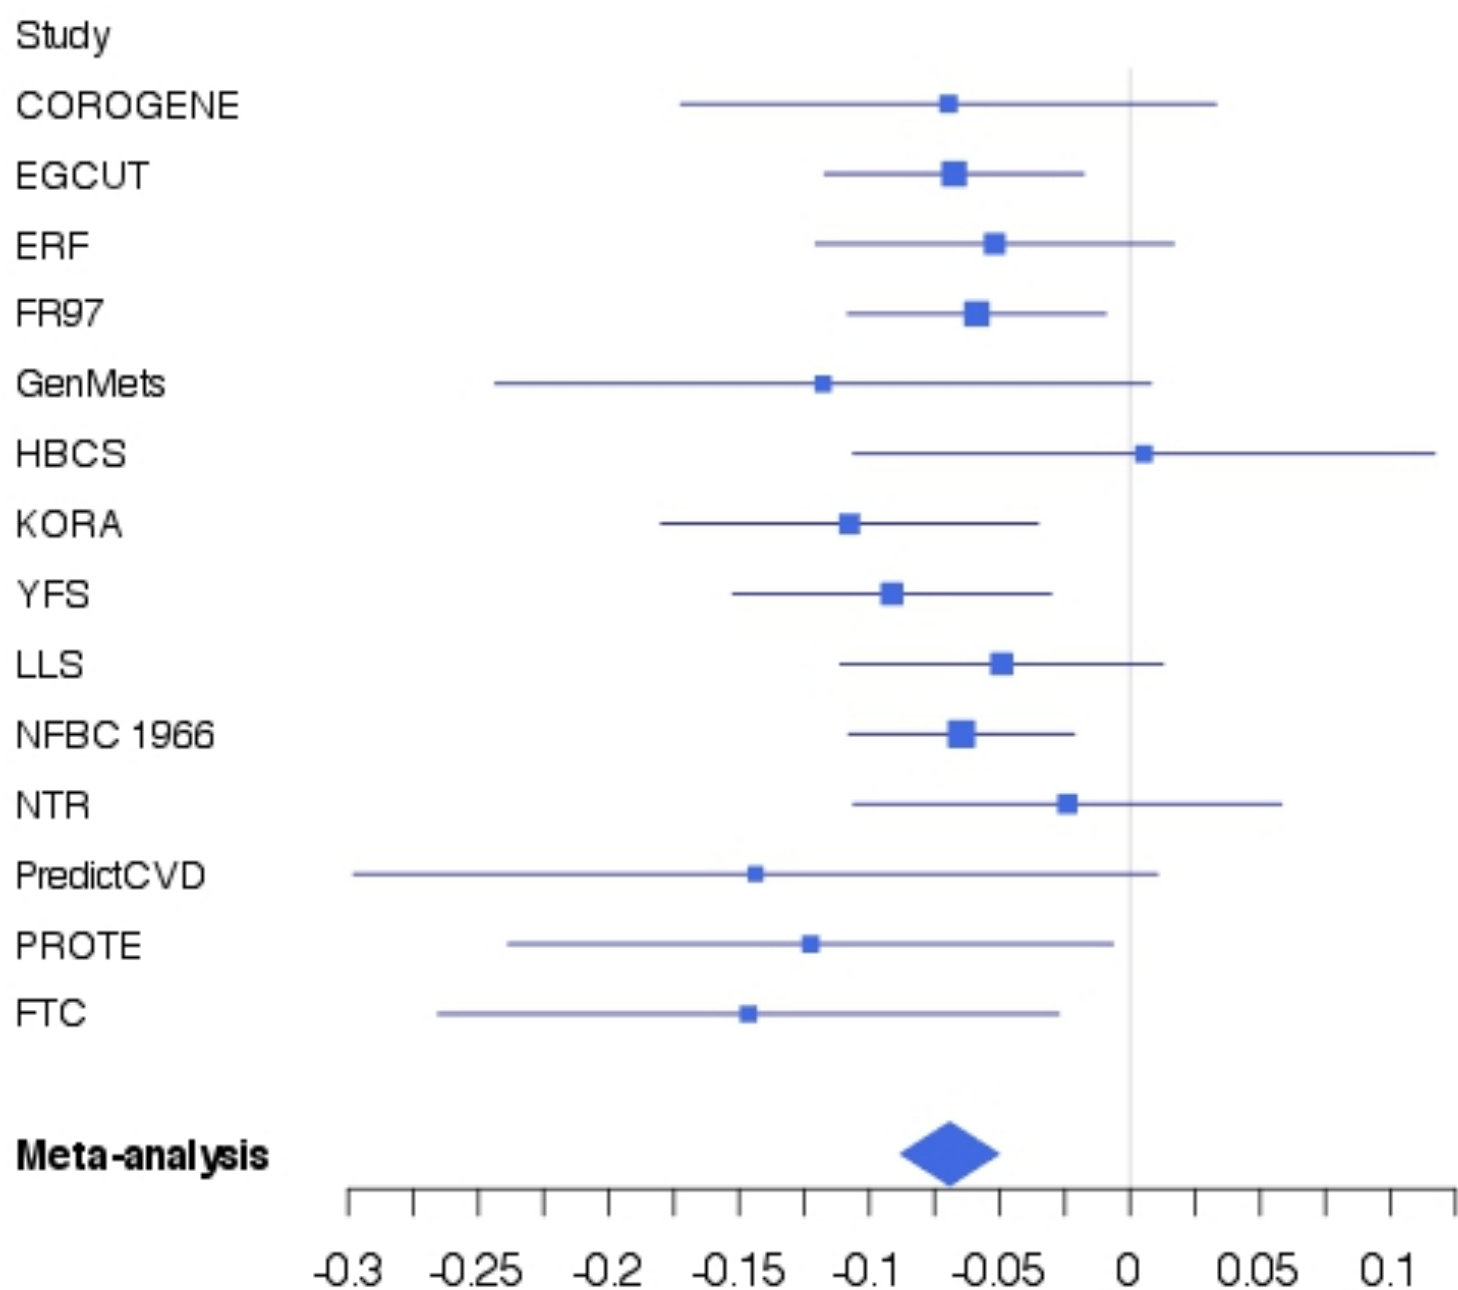

### SNP rs2657879, Chr 12, Pos 56865338, Gln

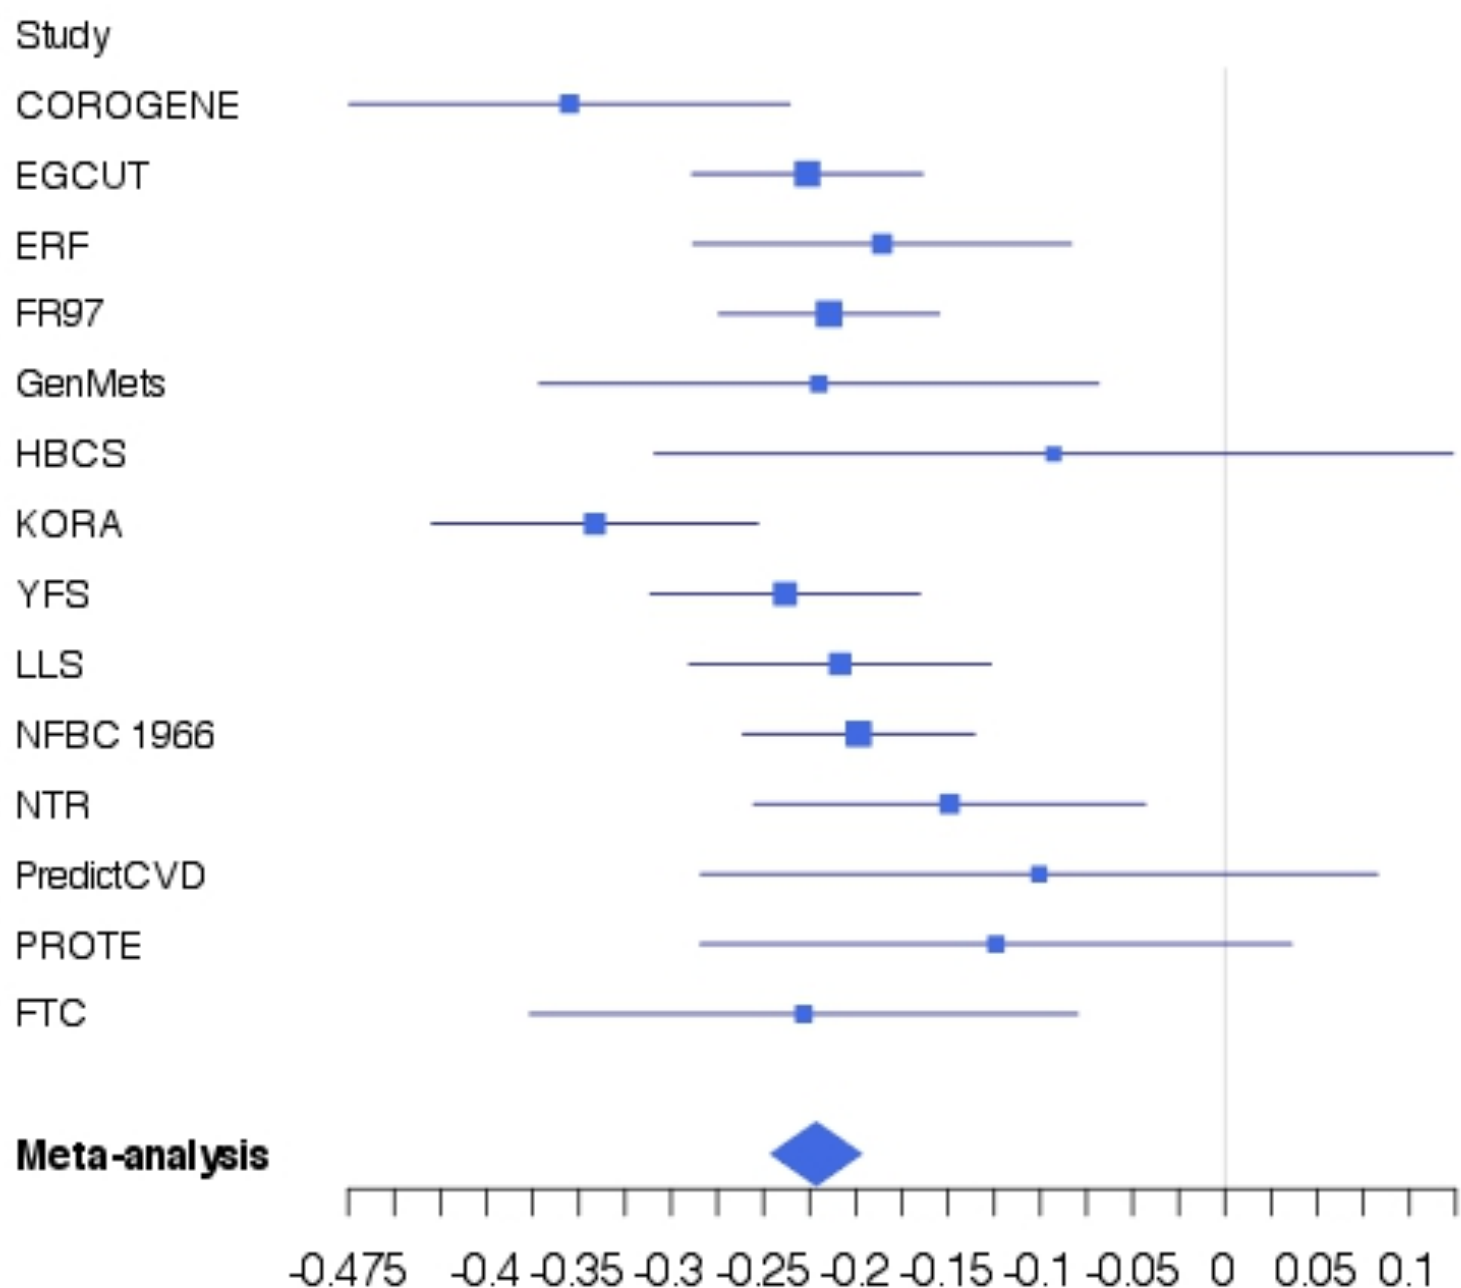

### SNP rs7954638, Chr 12, Pos 96314795, His

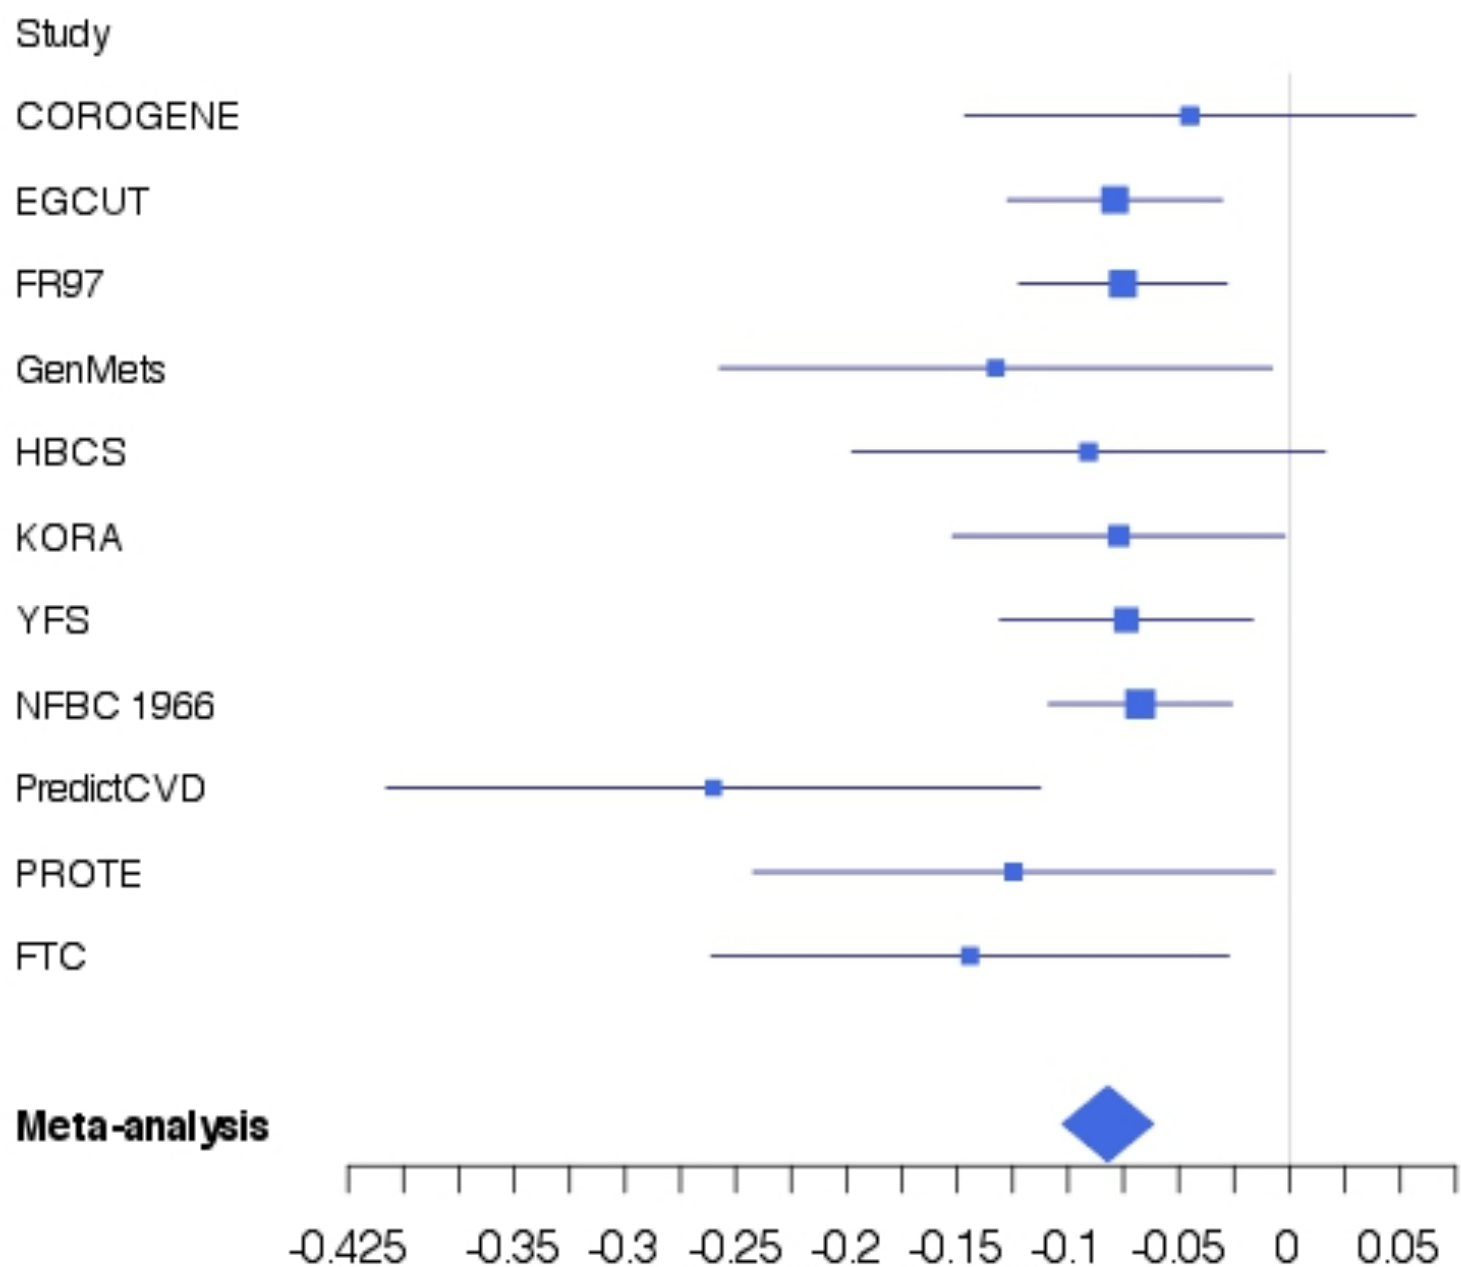



### SNP rs1718309, Chr 12, Pos 103242396, Phe

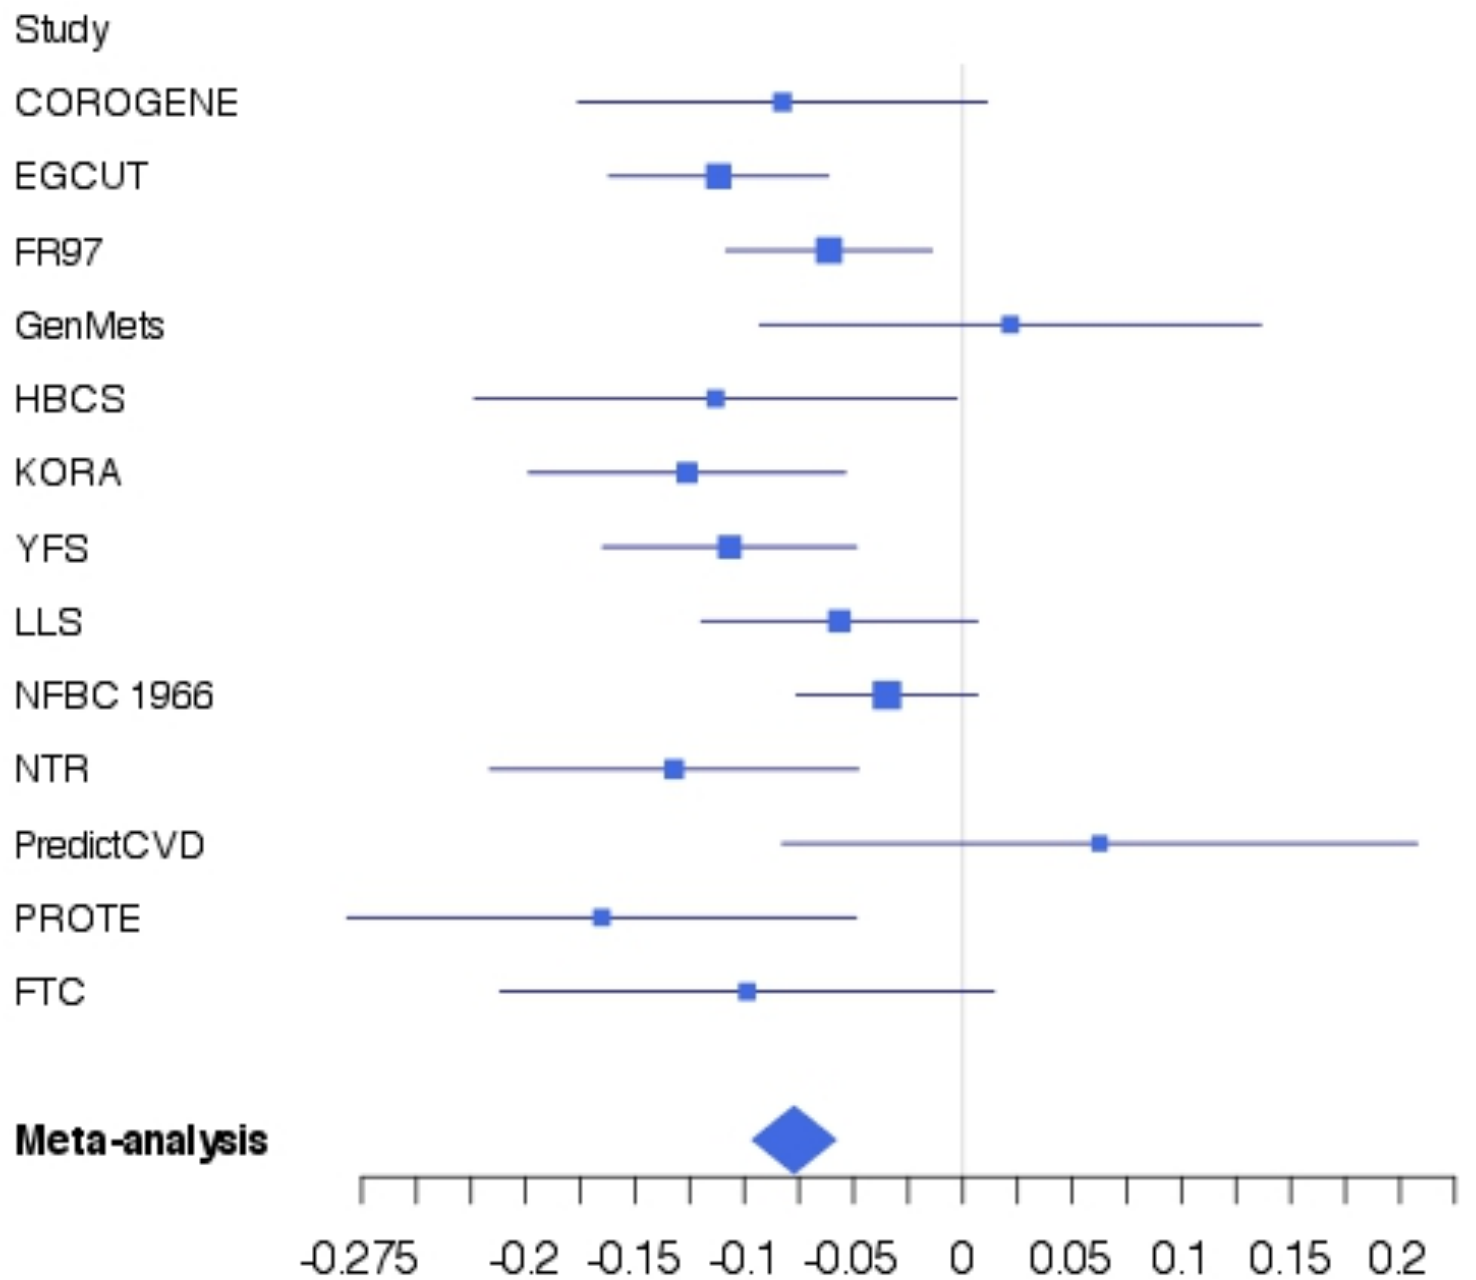

### SNP rs67053123, Chr 12, Pos 125353810, HDL.D

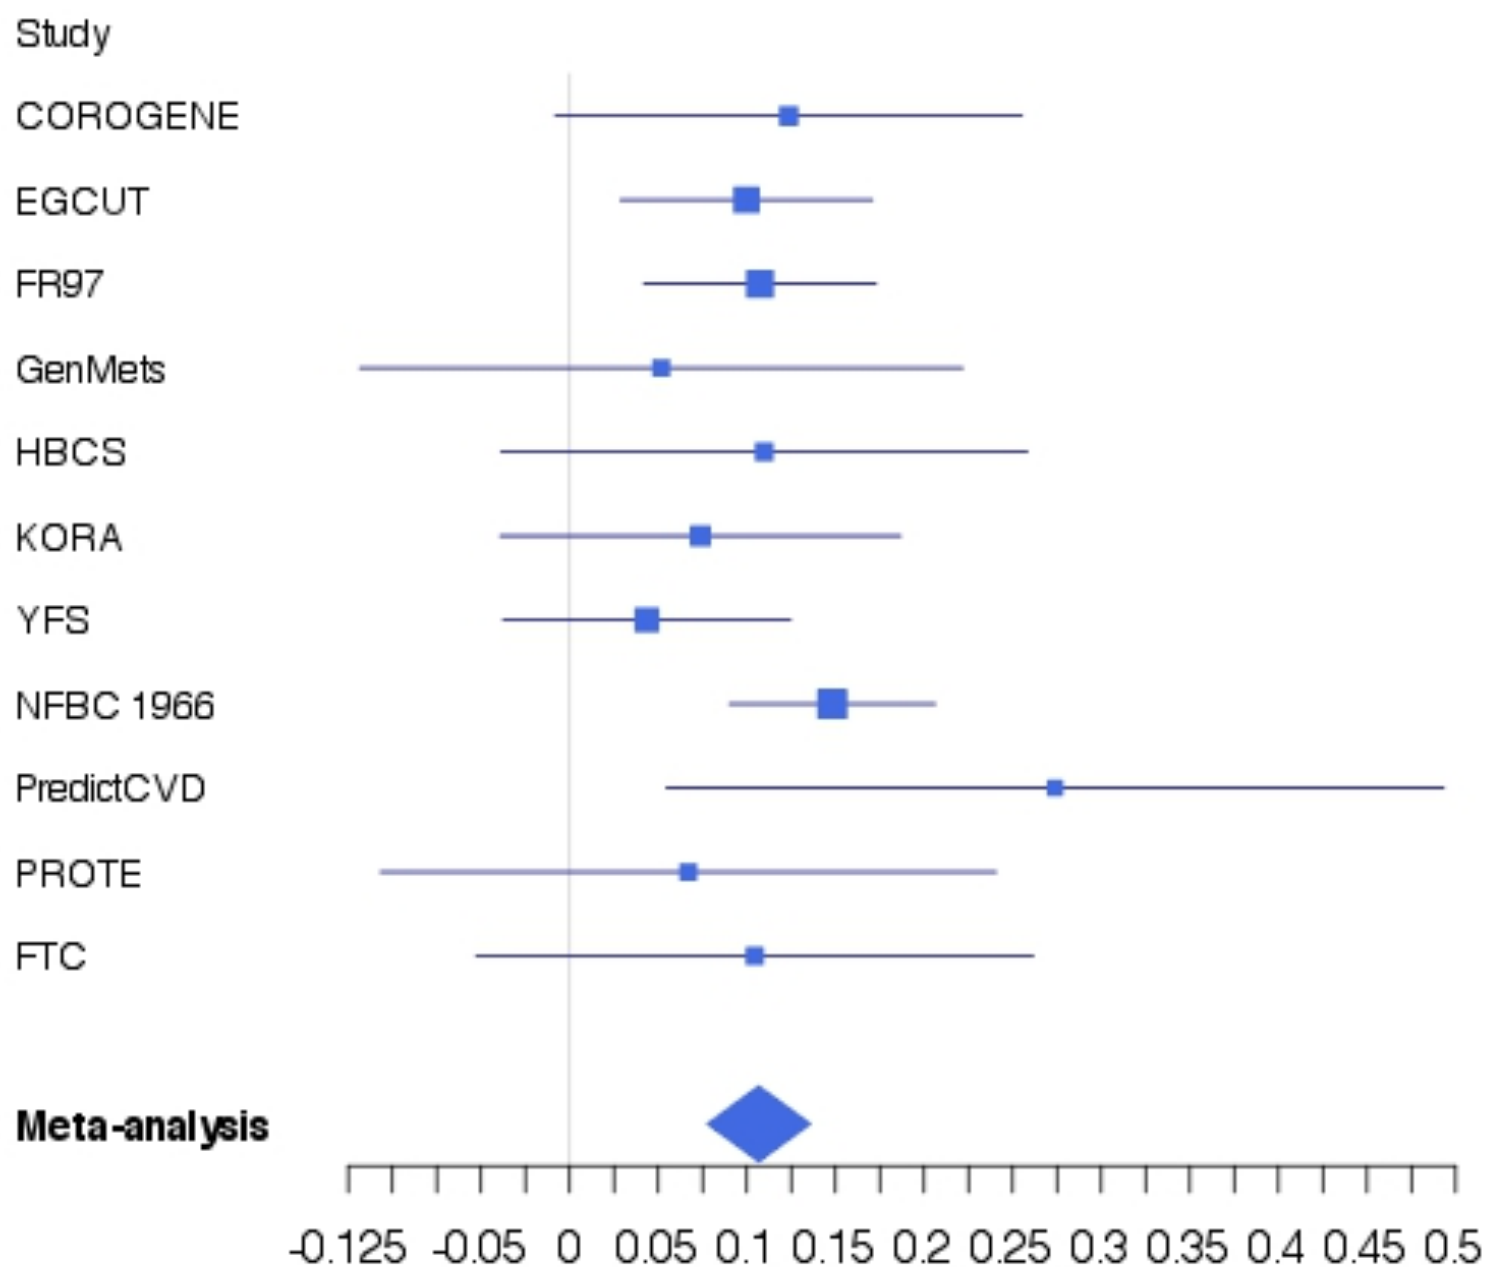

### SNP rs1998848, Chr 14, Pos 21492229, His

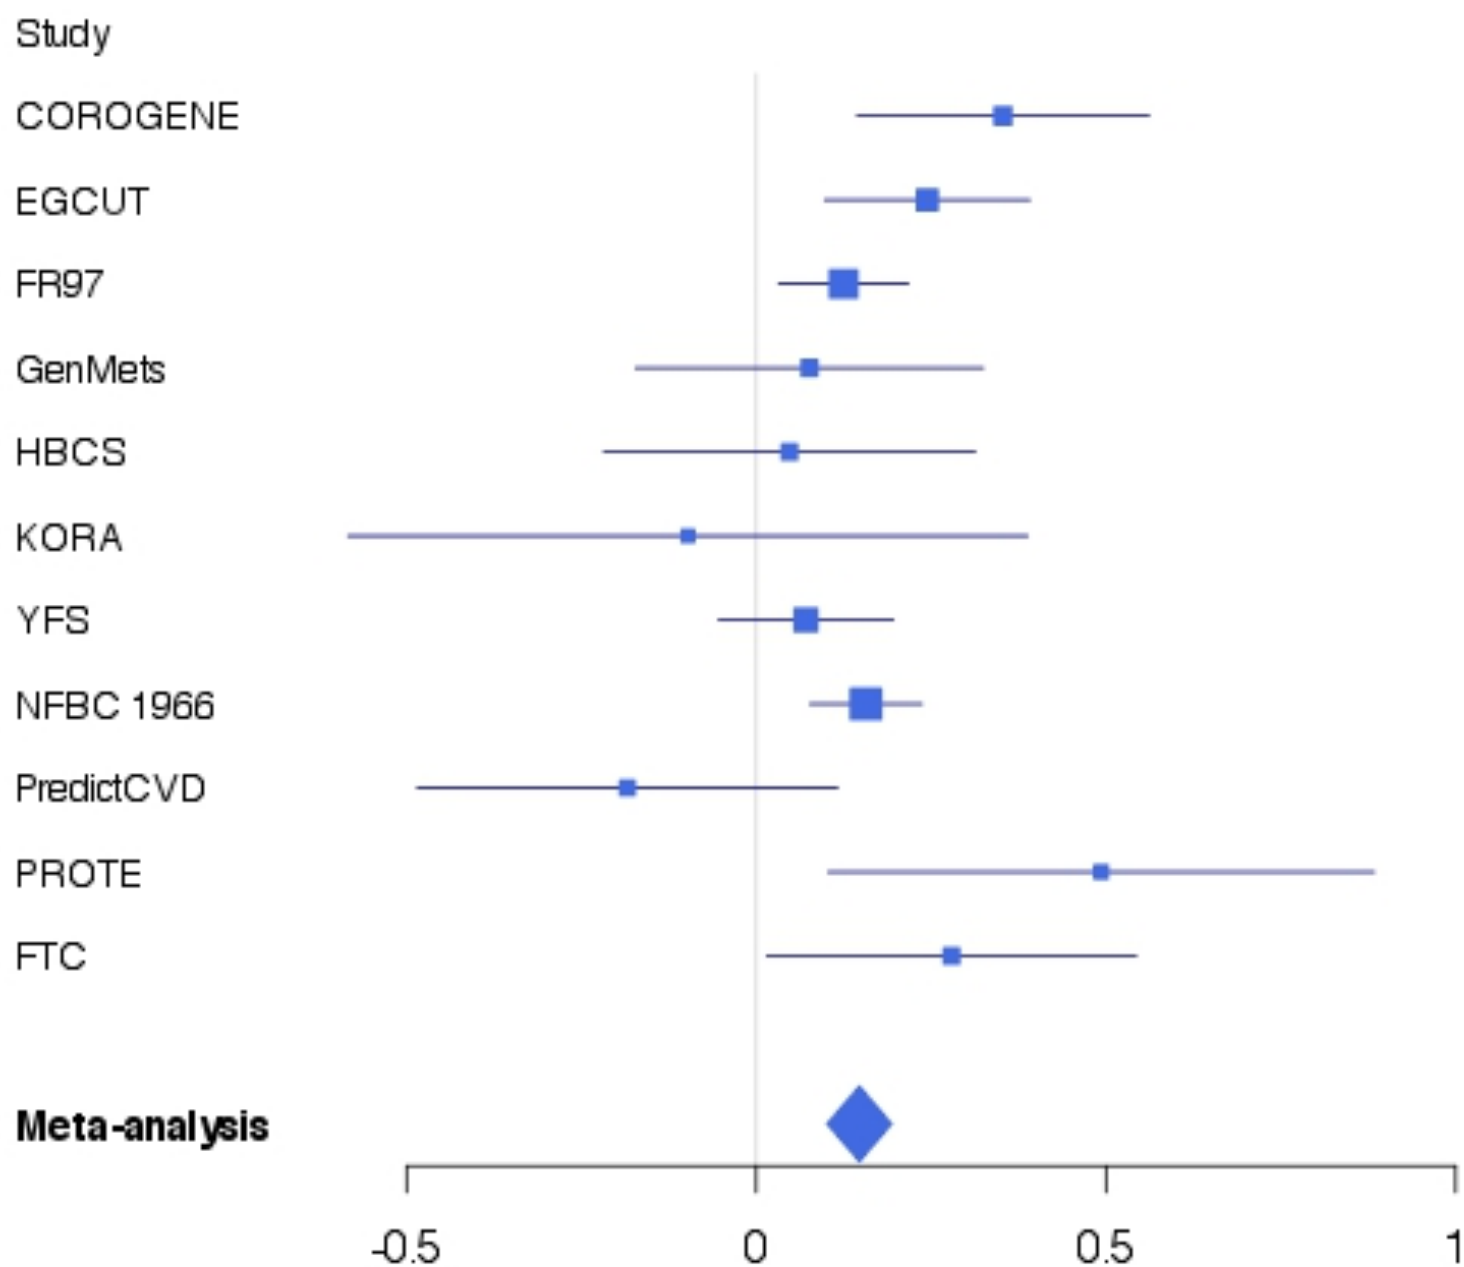

### SNP rs28929474, Chr 14, Pos 94844947, Gp

Study

COROGENE

EGCUT

FR97

GenMets

HBCS

KORA

YFS

NFBC 1966

PredictCVD

PROTE

FTC

**Meta-analysis**

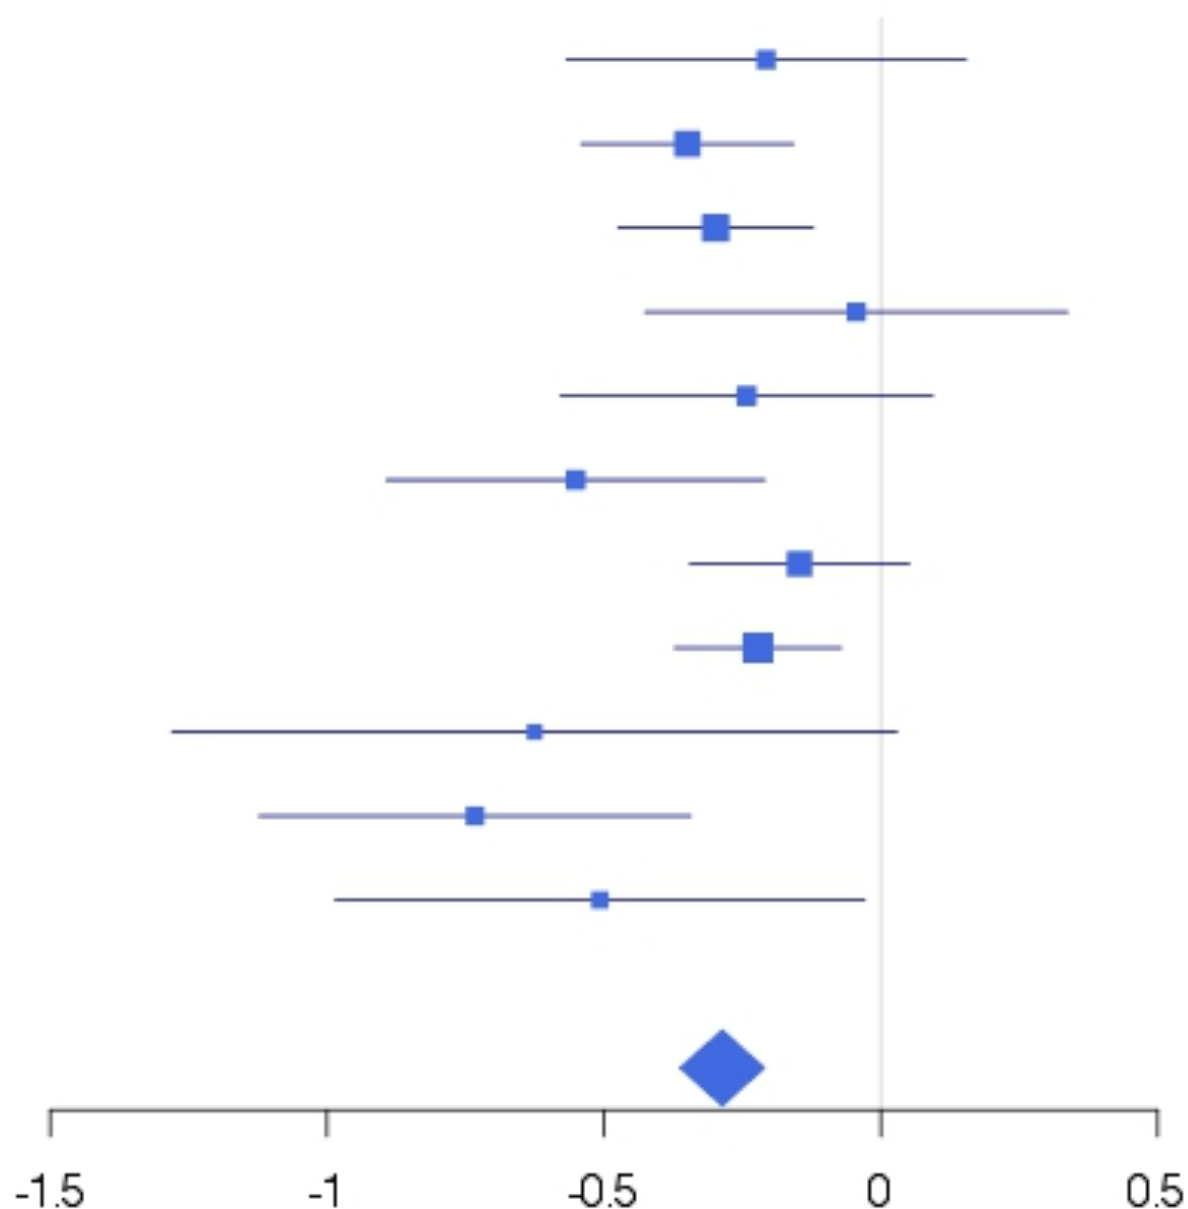

### SNP rs61524473, Chr 15, Pos 45646283, Crea

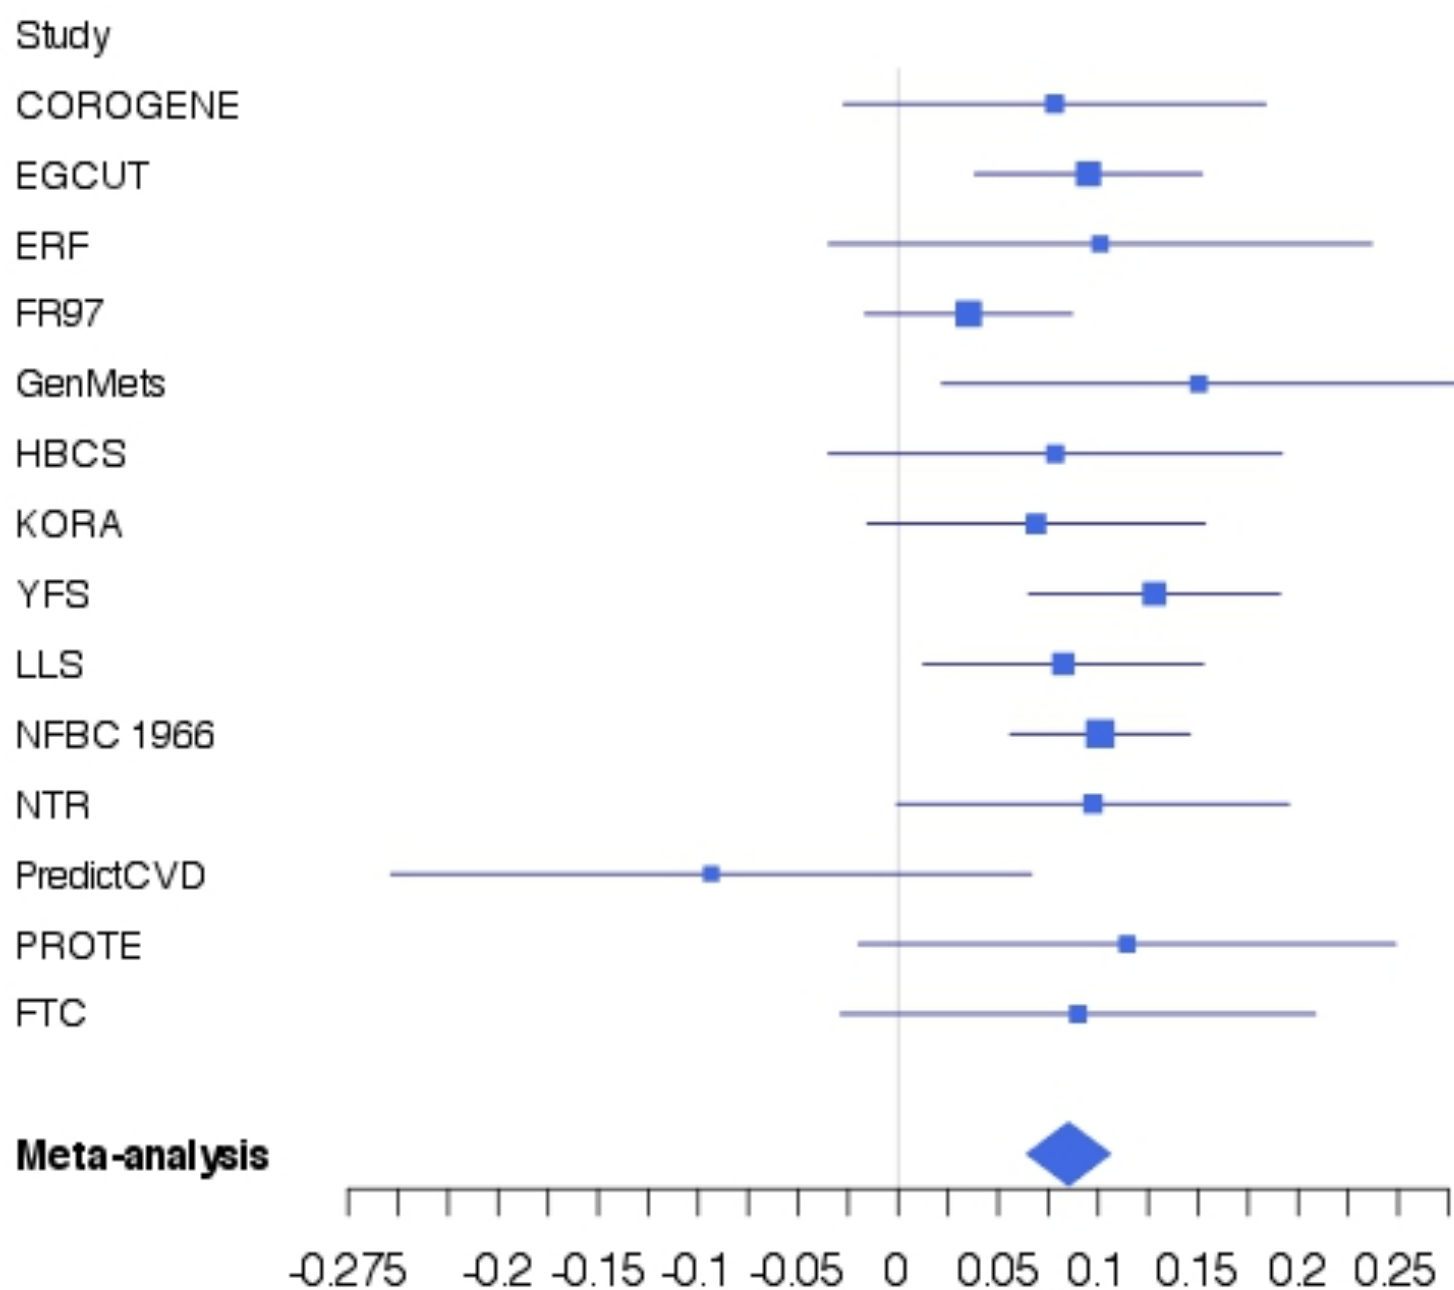

### SNP rs1532085, Chr 15, Pos 58683366, XL.HDL.TG

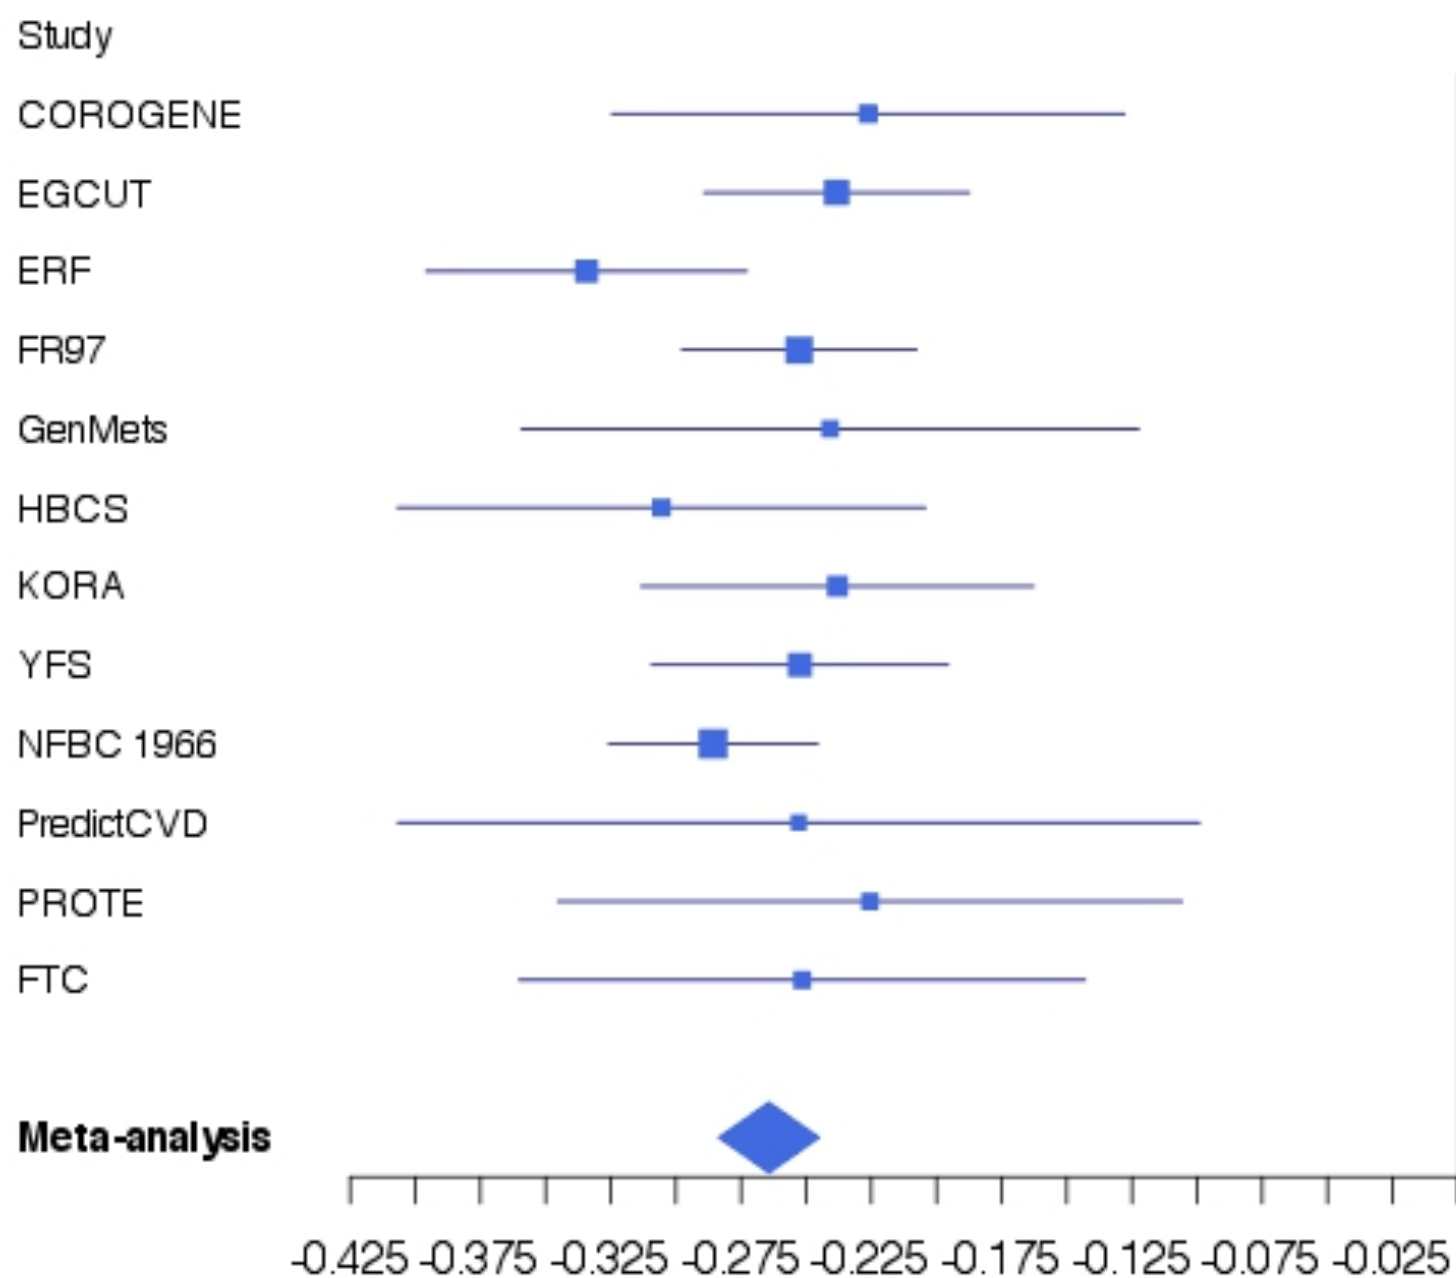

### SNP rs11644601, Chr 16, Pos 15172118, Bis.DB.ratio

Study

COROGENE

FR97

GenMets

HBCS

KORA

YFS

NFBC 1966

PredictCVD

PROTE

FTC

**Meta-analysis**

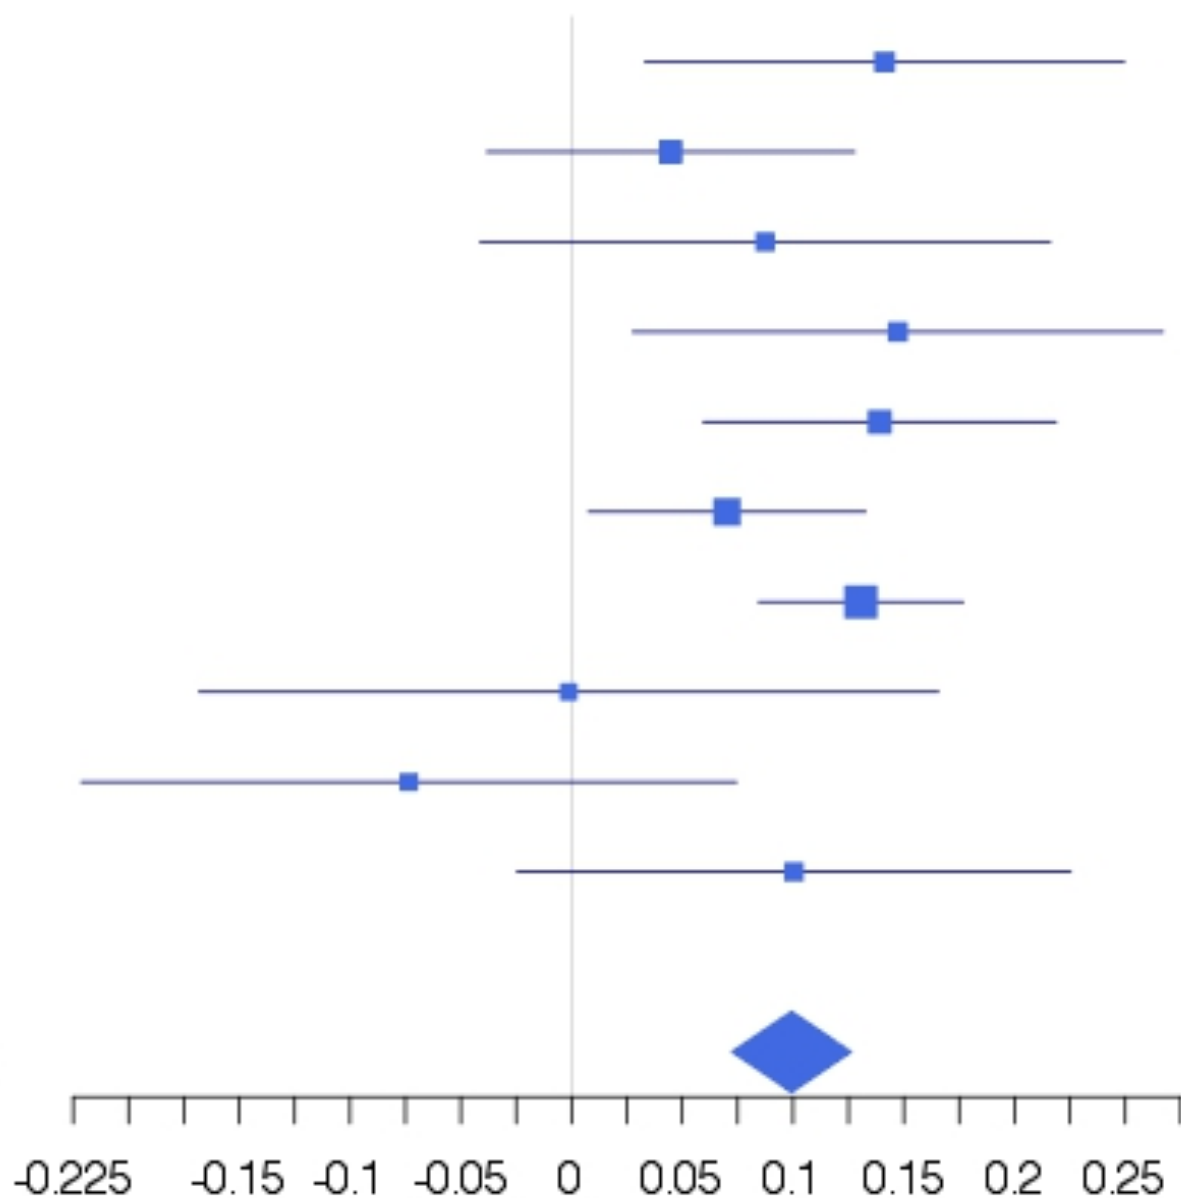

### SNP rs247617, Chr 16, Pos 56990716, HDL.C

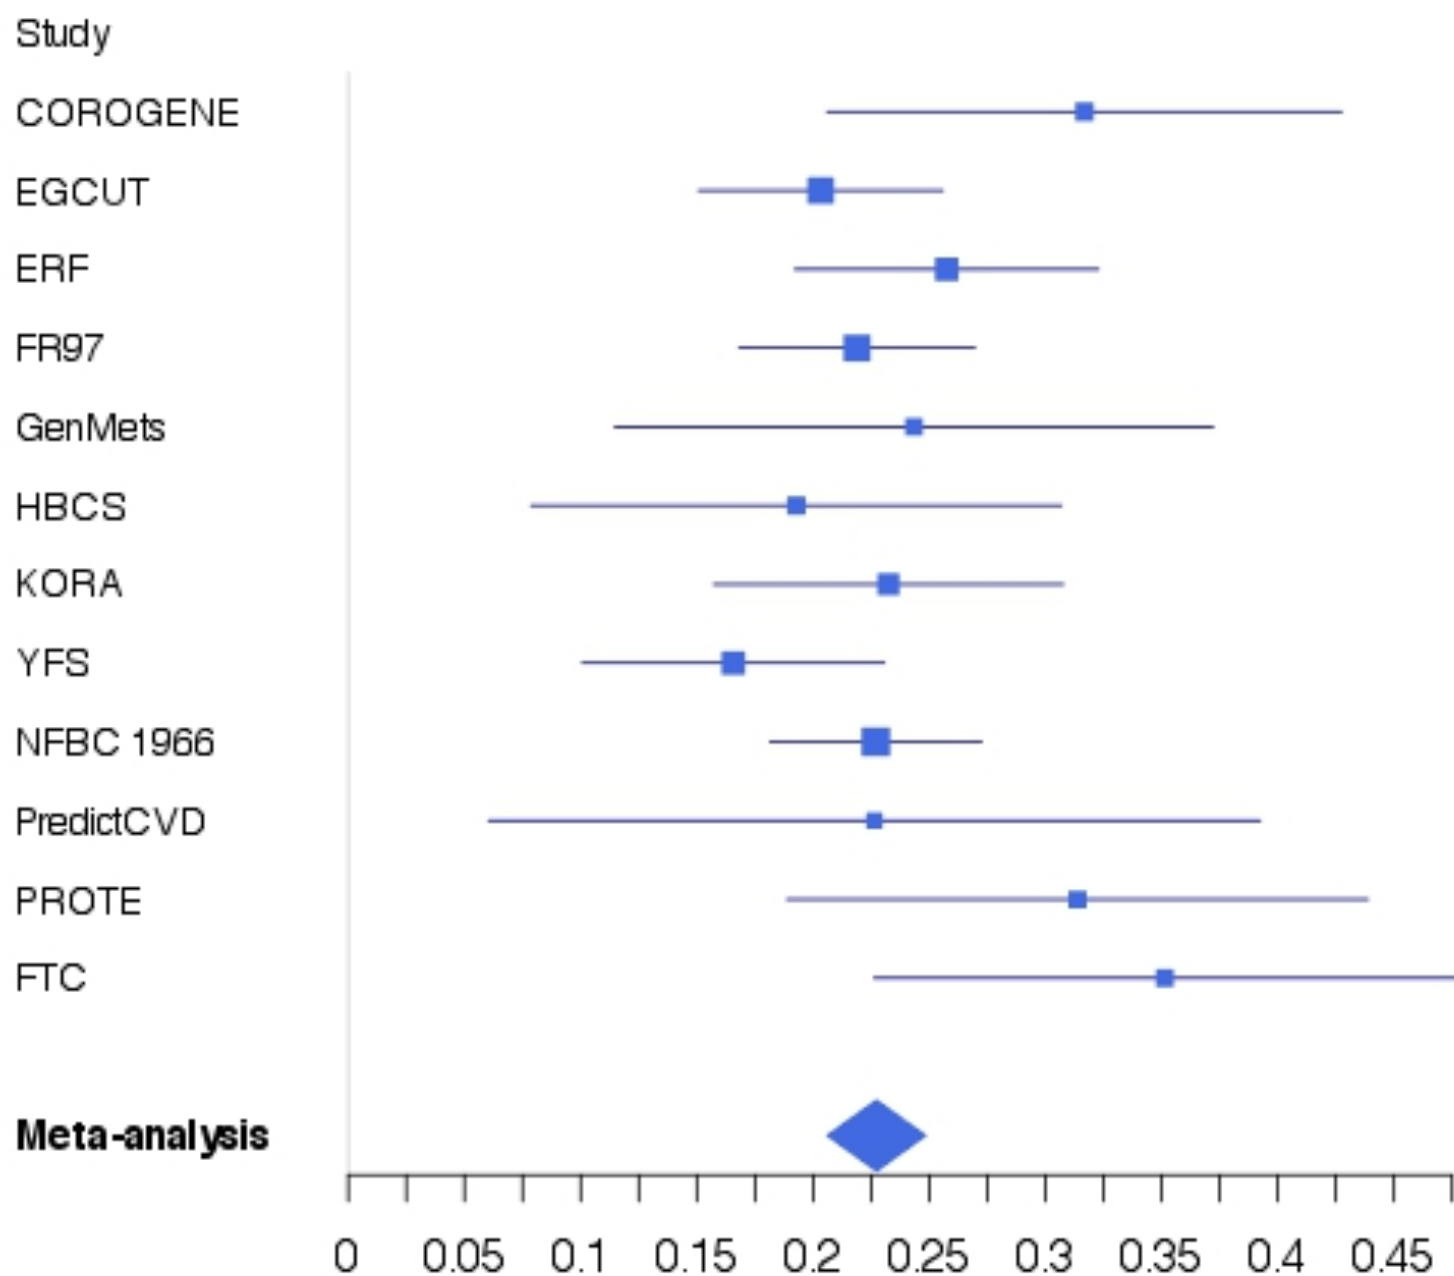



### SNP rs74249229, Chr 16, Pos 69979271, Pyr

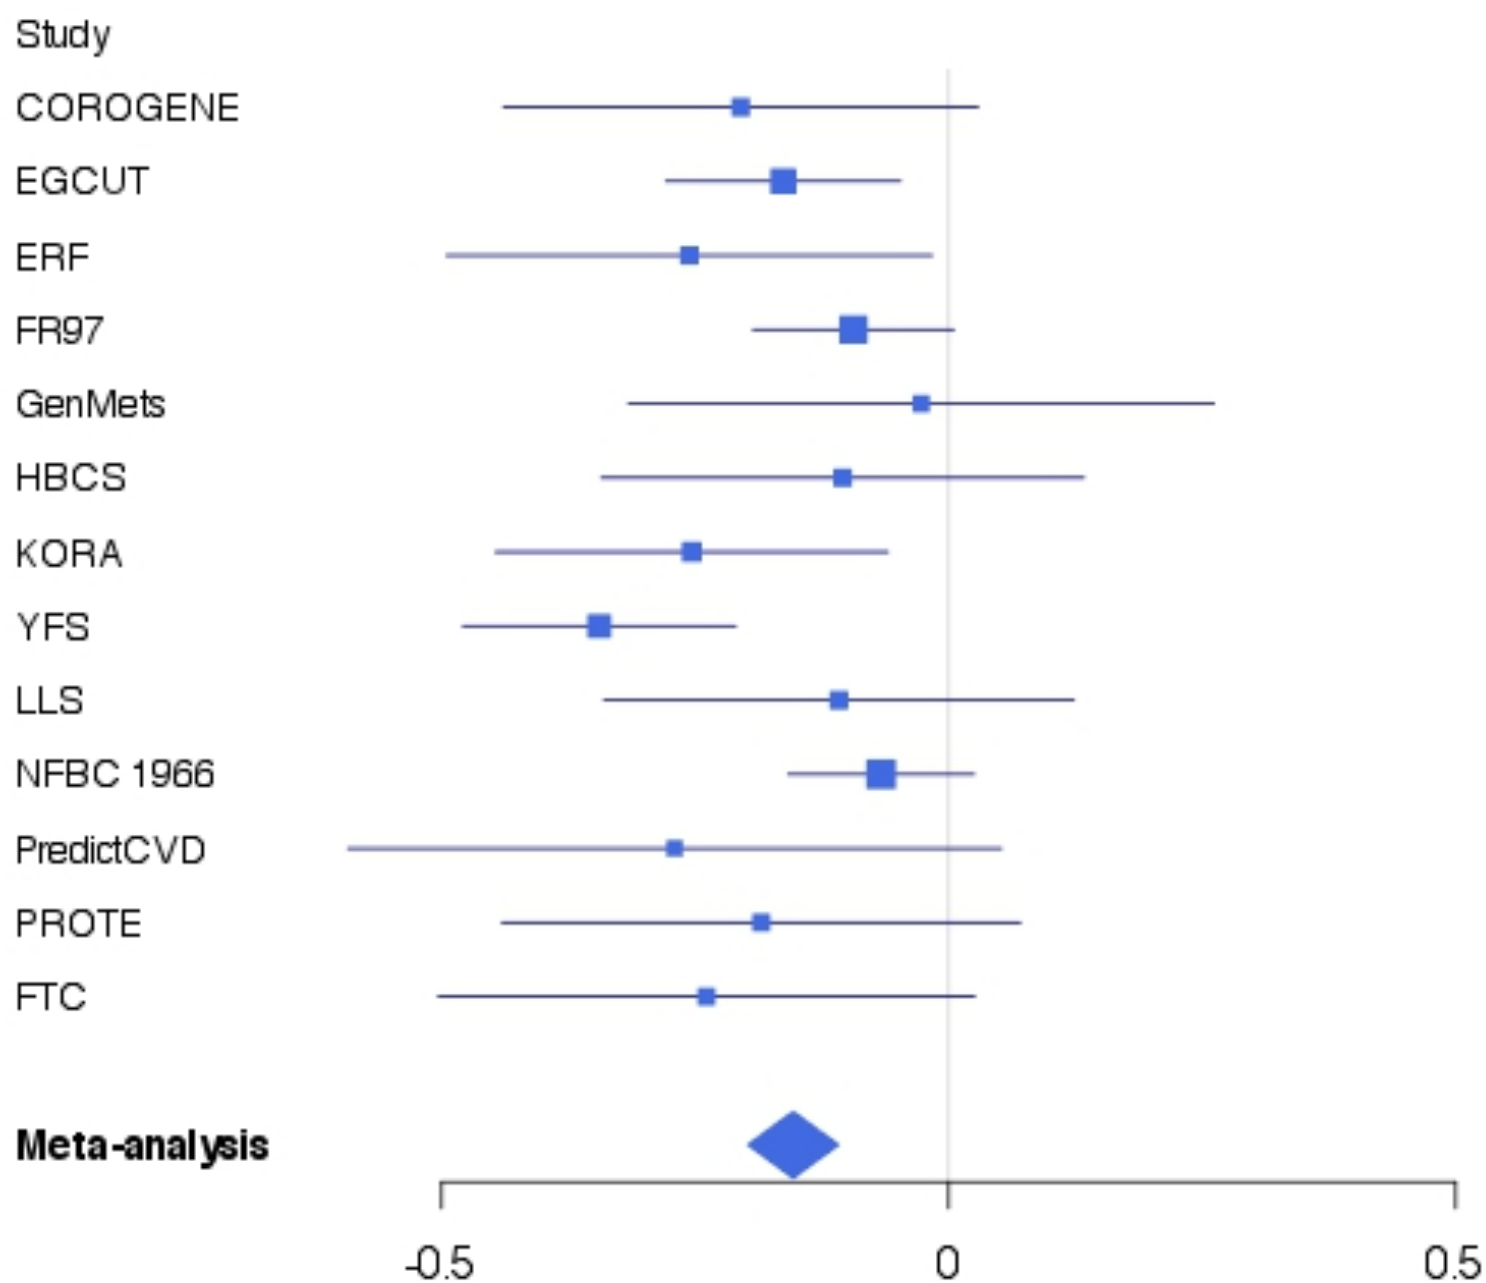

### SNP rs77303550, Chr 16, Pos 72079657, Gp

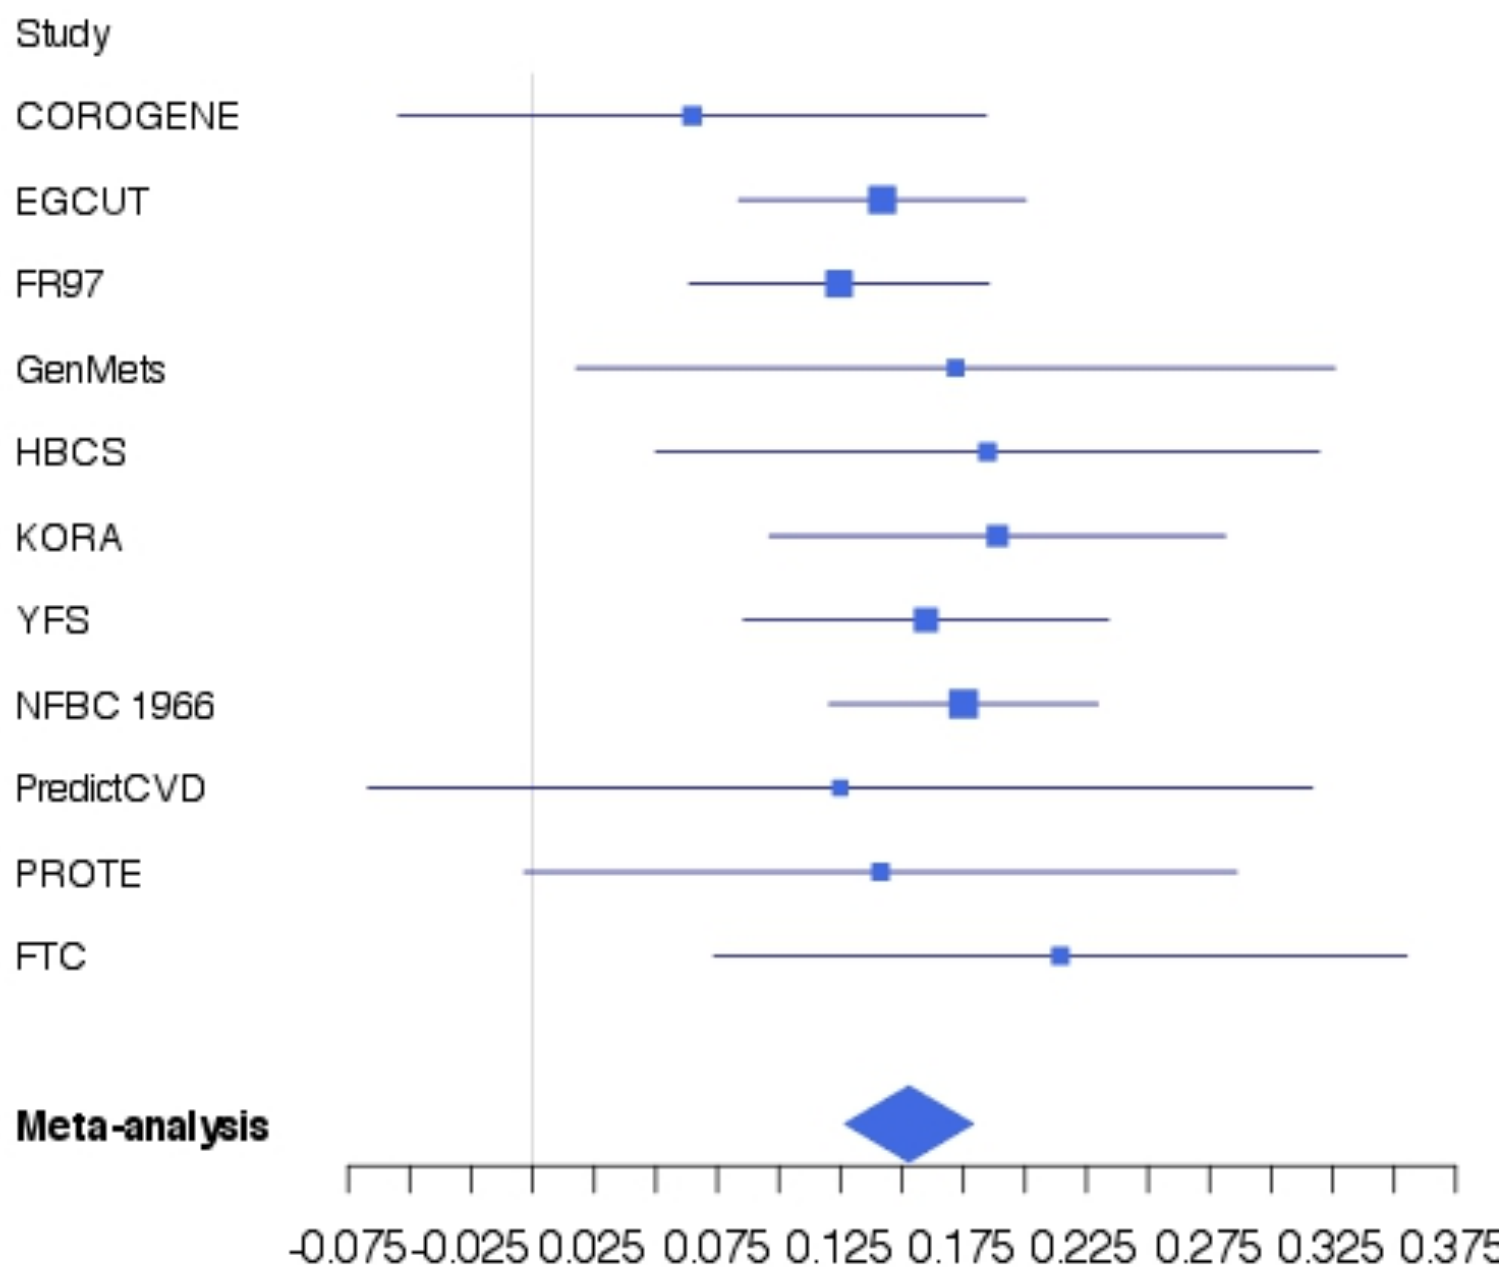

### SNP rs10083777, Chr 16, Pos 81065282, Gly

Study

COROGENE

FR97

GenMets

HBCS

KORA

YFS

LLS

NFBC 1966

NTR

PredictCVD

FTC

**Meta-analysis**

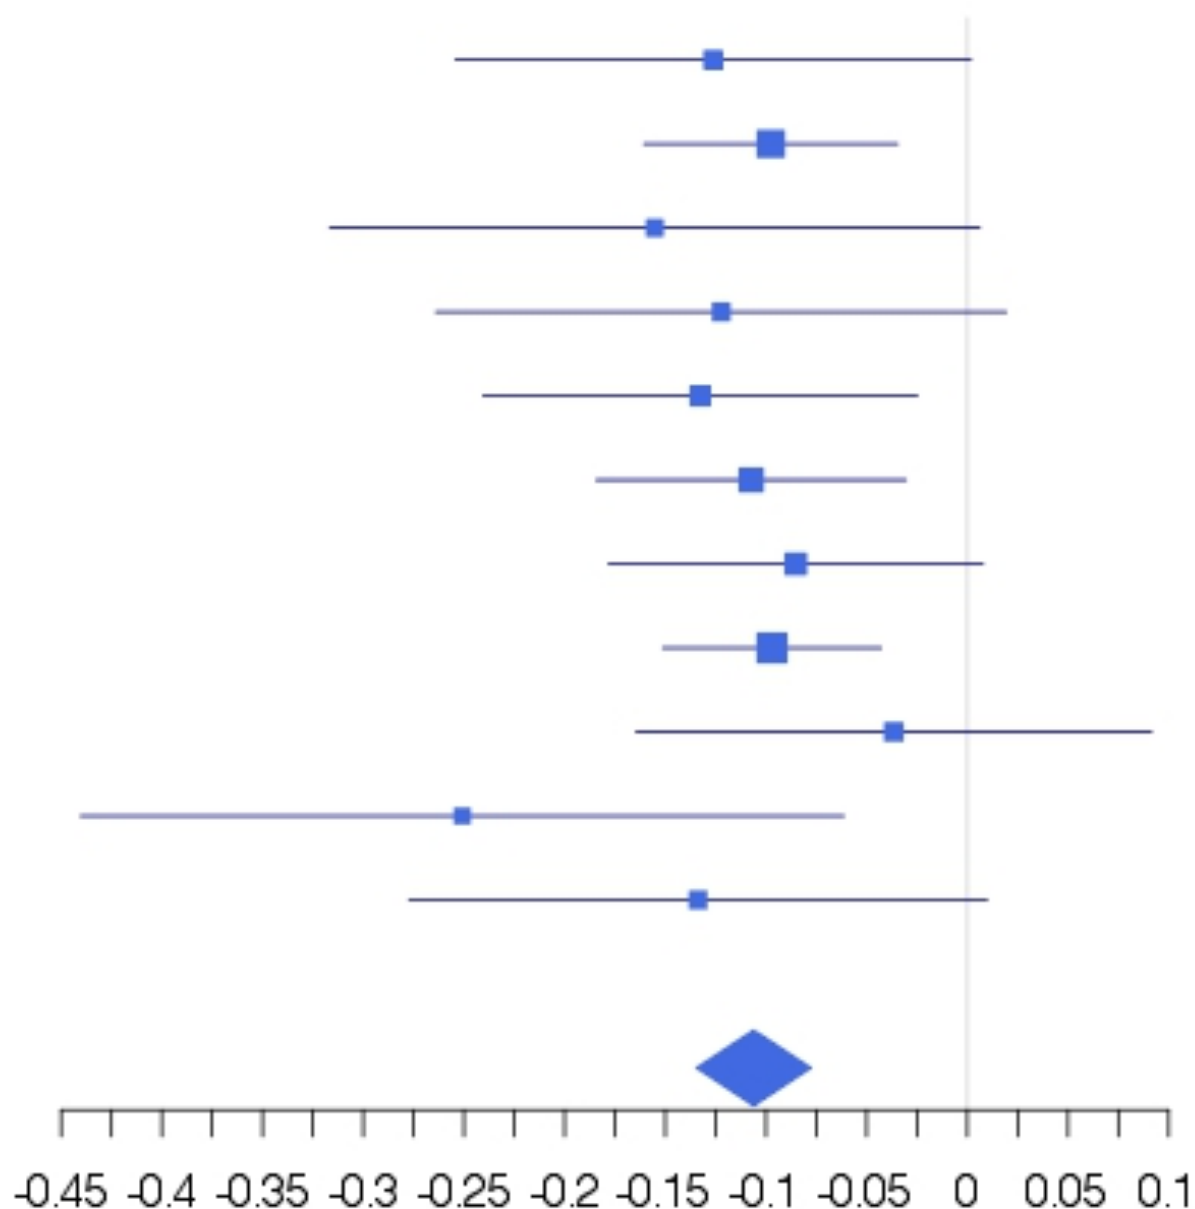

### SNP rs181807530, Chr 17, Pos 4774814, SM

Study

COROGENE

FR97

GenMets

HBCS

YFS

NFBC 1966

PredictCVD

FTC

**Meta-analysis**

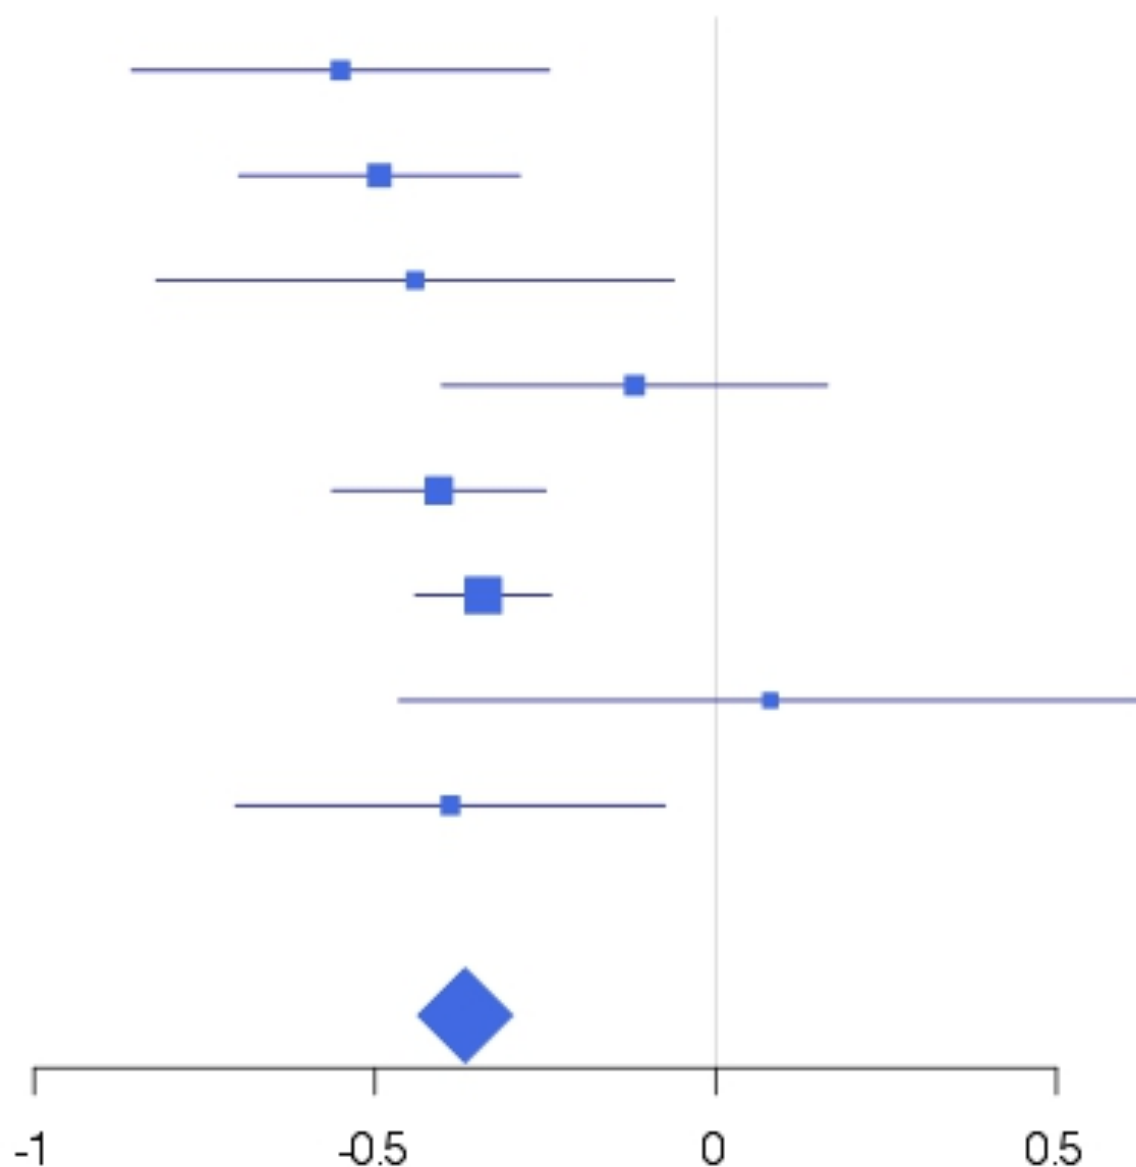

### SNP rs172642, Chr 17, Pos 6595398, Cit

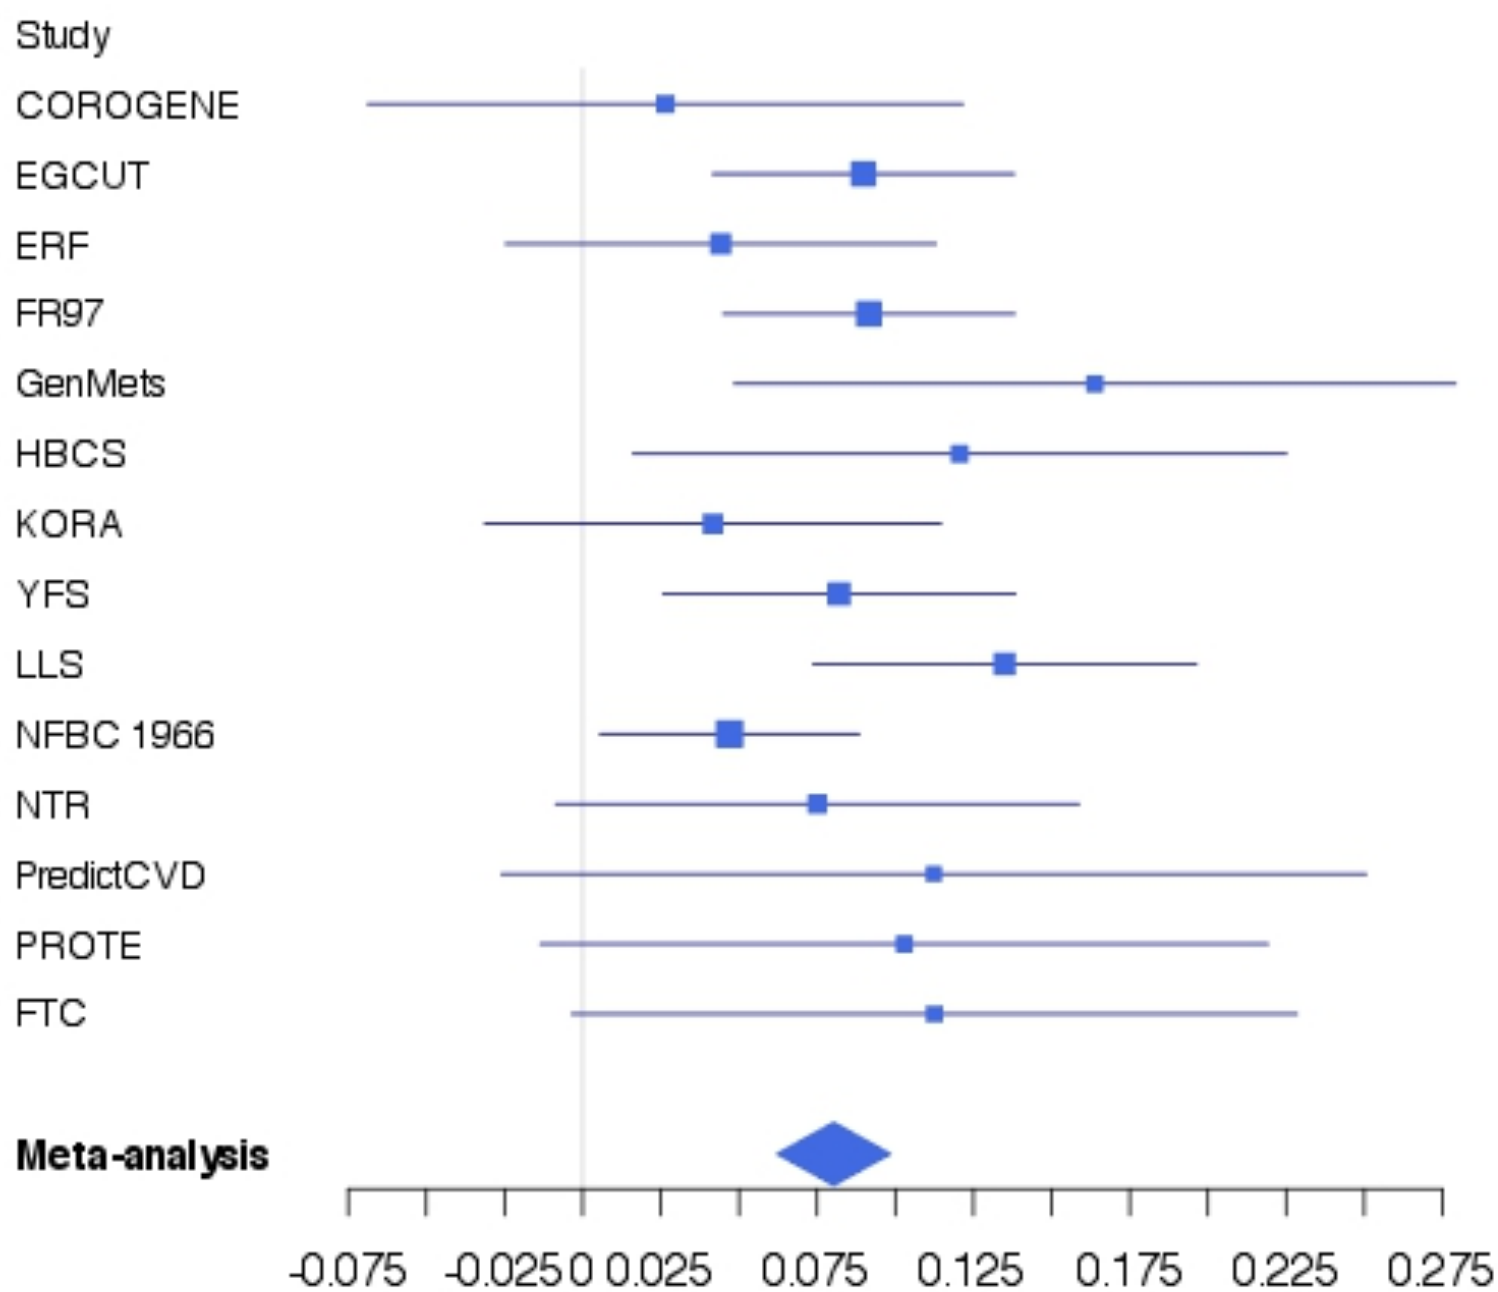

### SNP rs2079742, Chr 17, Pos 59465697, Crea

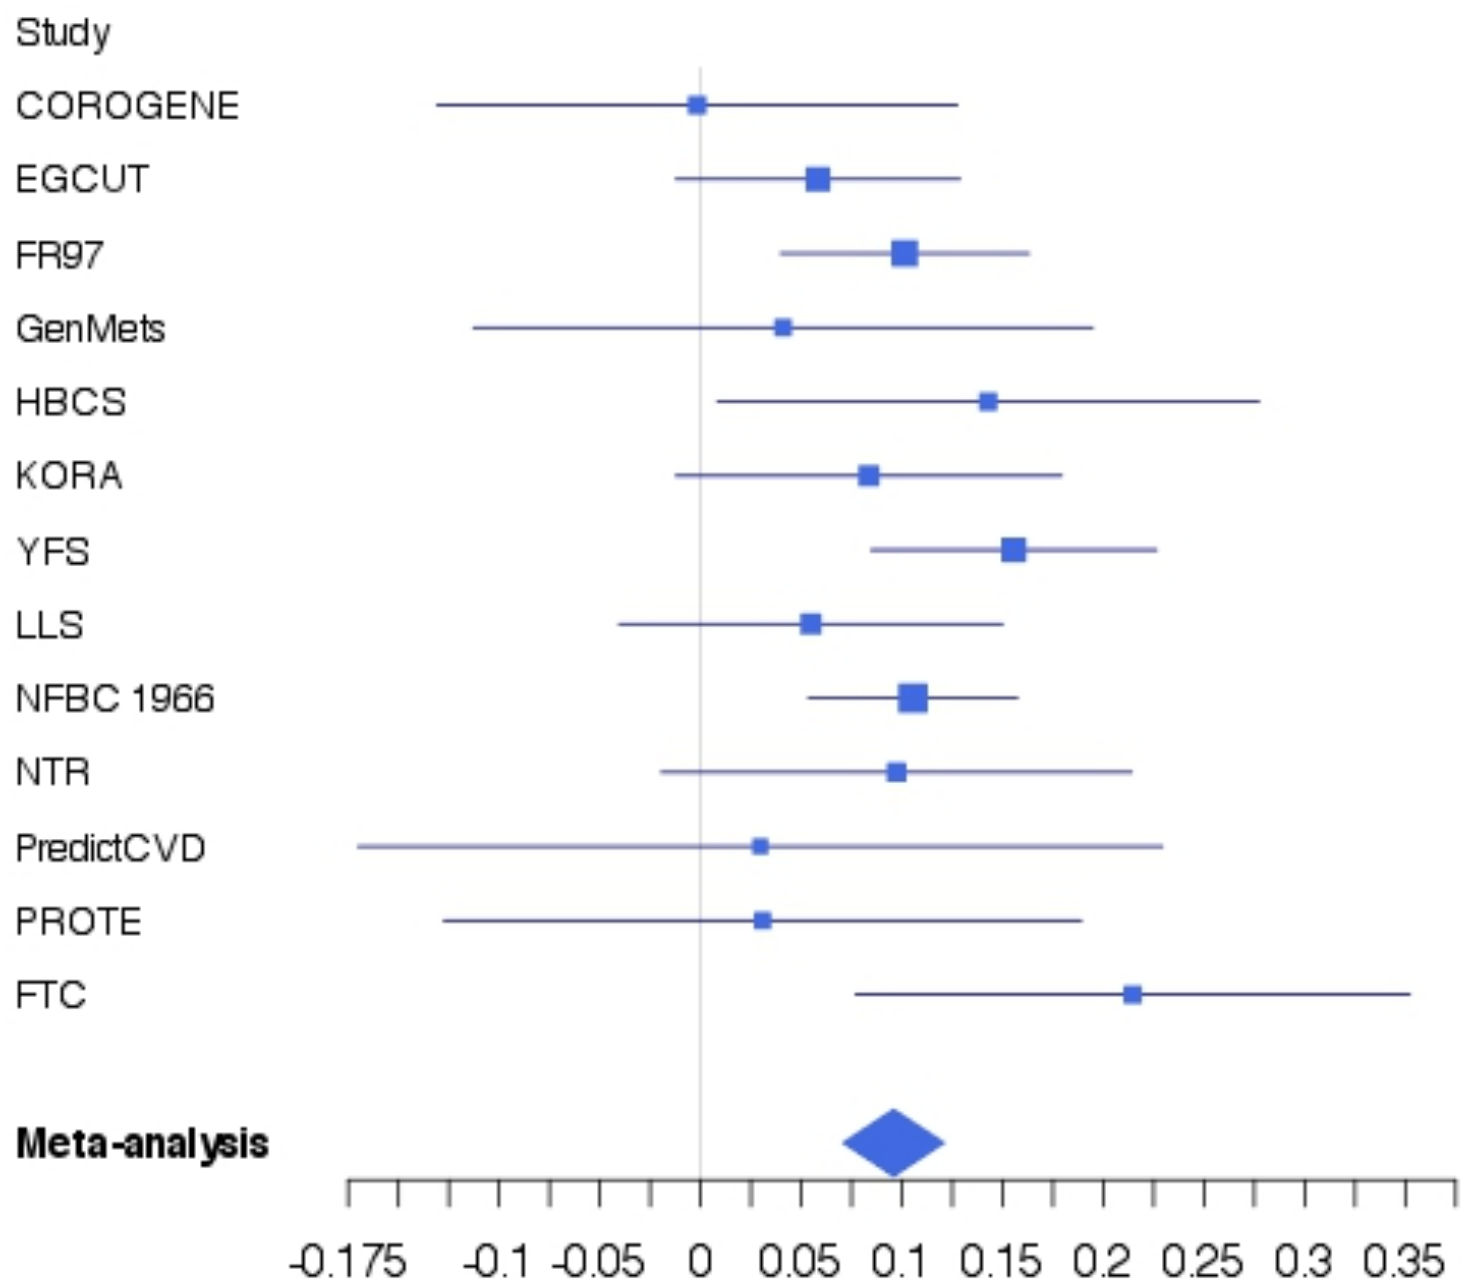

### SNP rs6507939, Chr 18, Pos 47176261, HDL.D

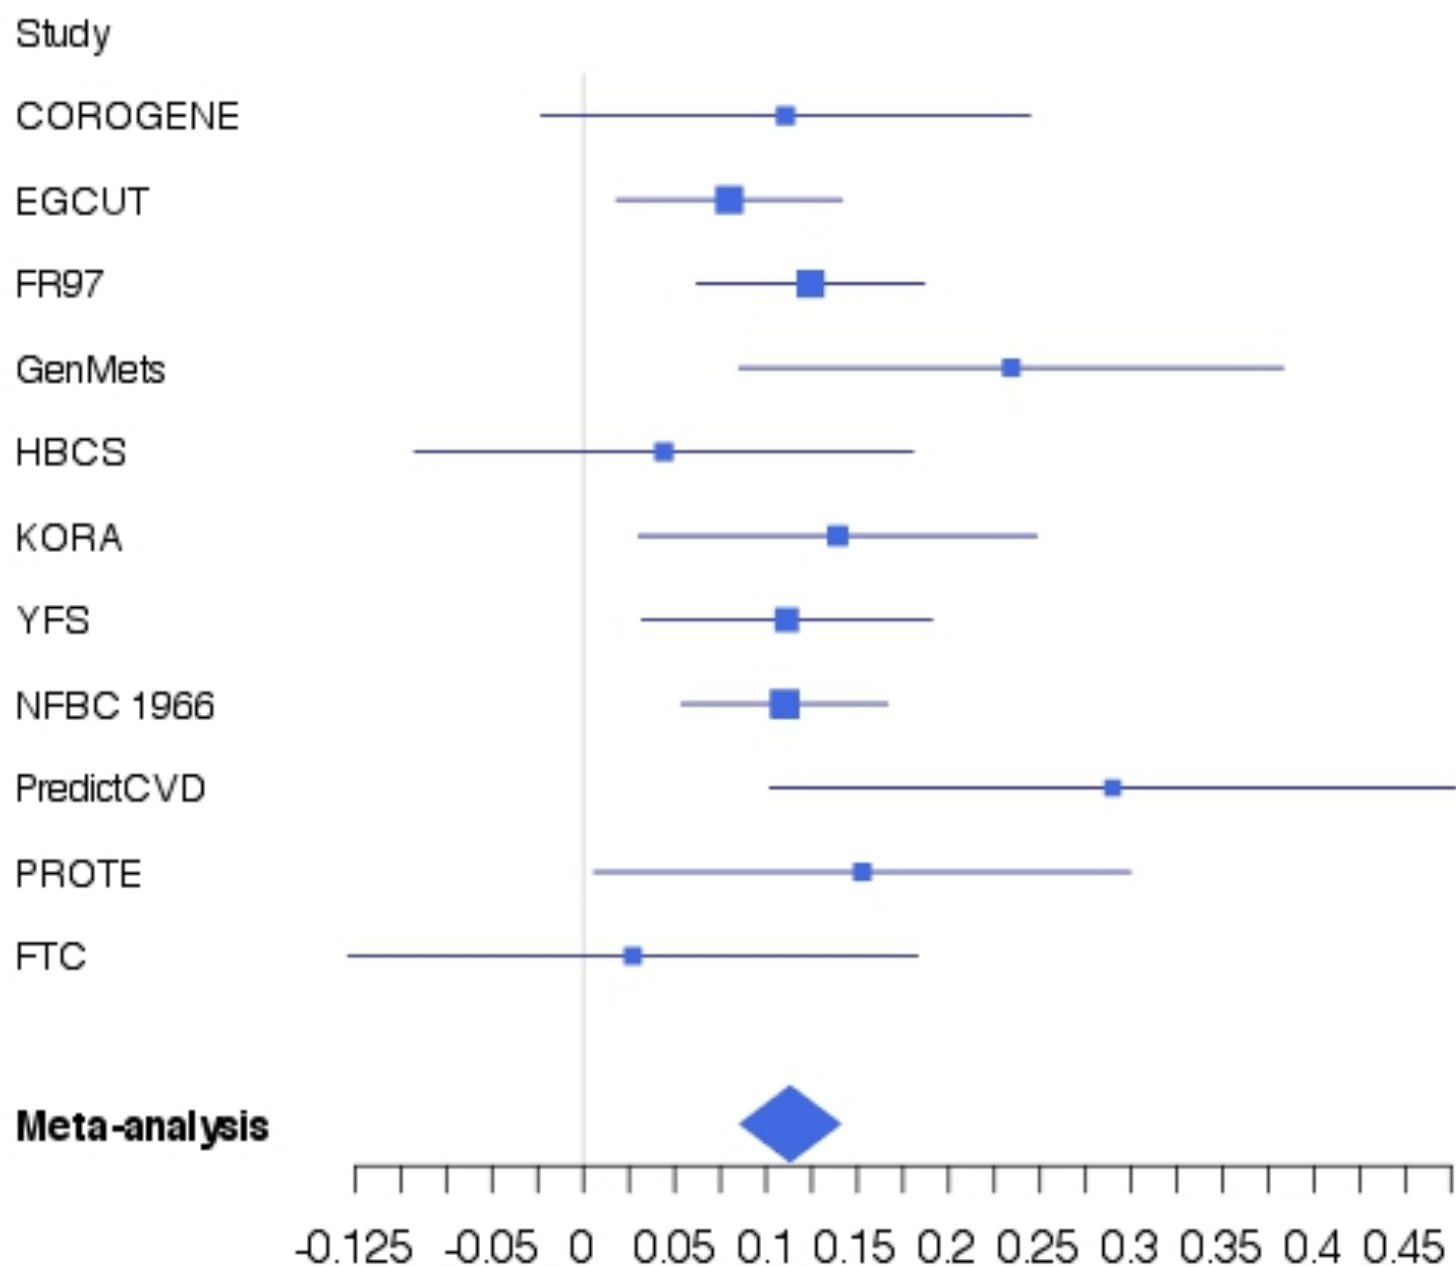

**SNP rs116843064, Chr 19, Pos 8429323, VLDL.D**

Study

COROGENE

EGCUT

FR97

GenMets

HBCS

KORA

YFS

NFBC 1966

PredictCVD

PROTE

FTC

**Meta-analysis**

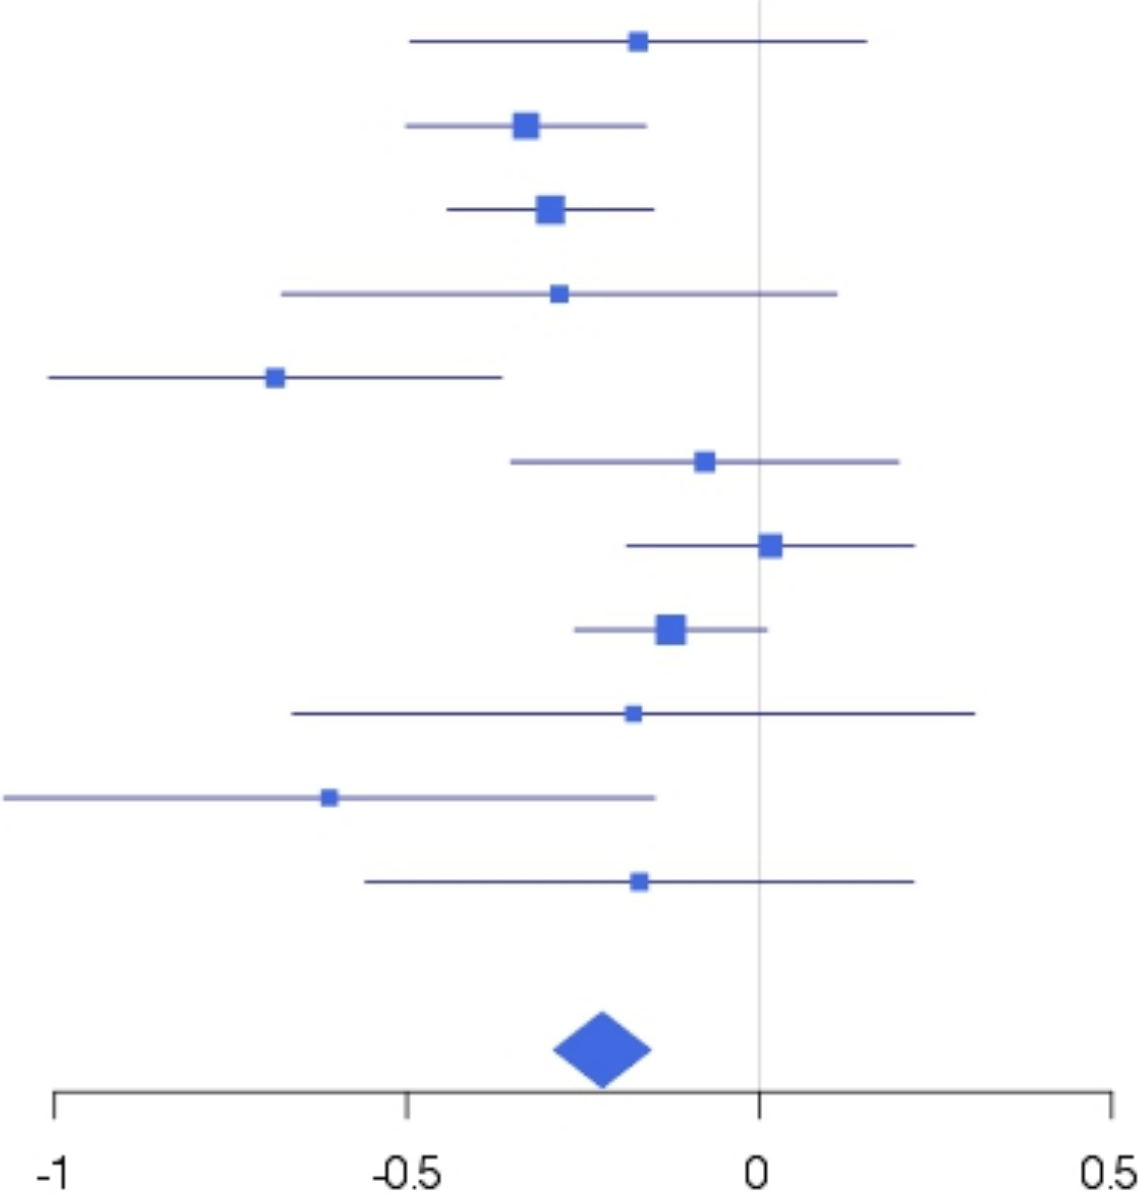



### SNP rs142130958, Chr 19, Pos 11190652, L.LDL.FC

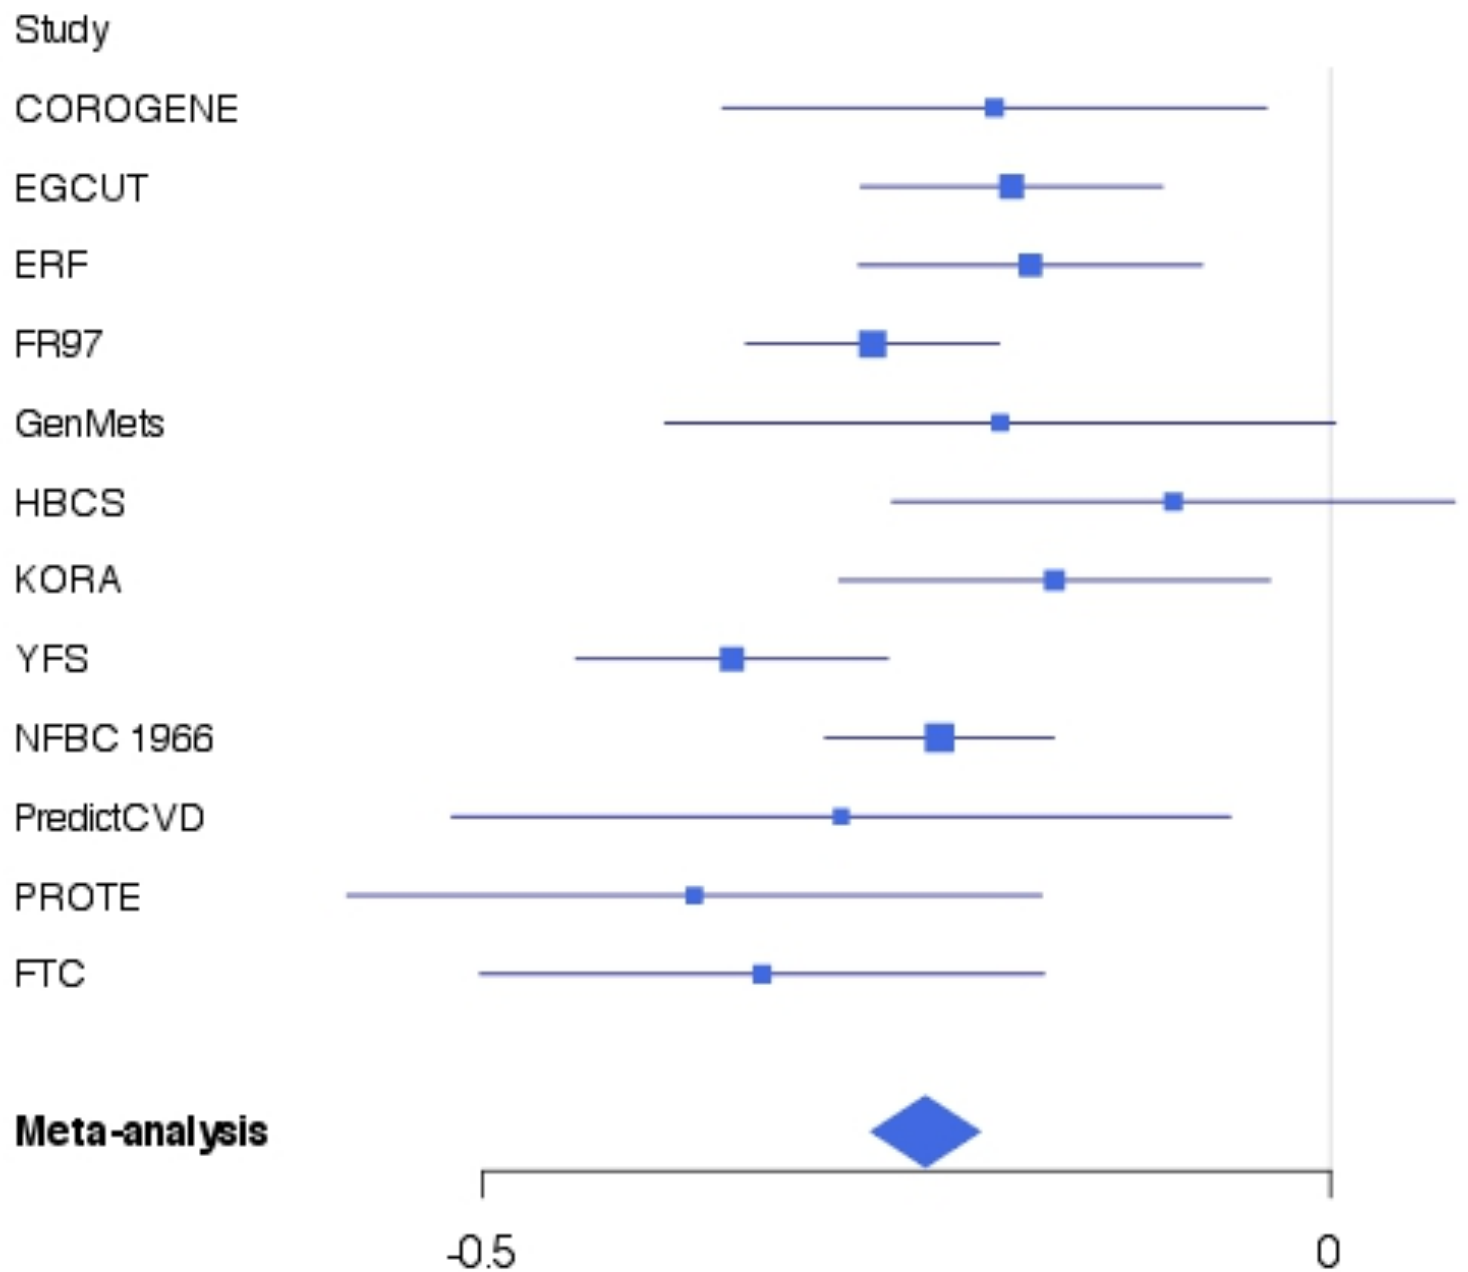

### SNP rs72999033, Chr 19, Pos 19366632, M.VLDL.C

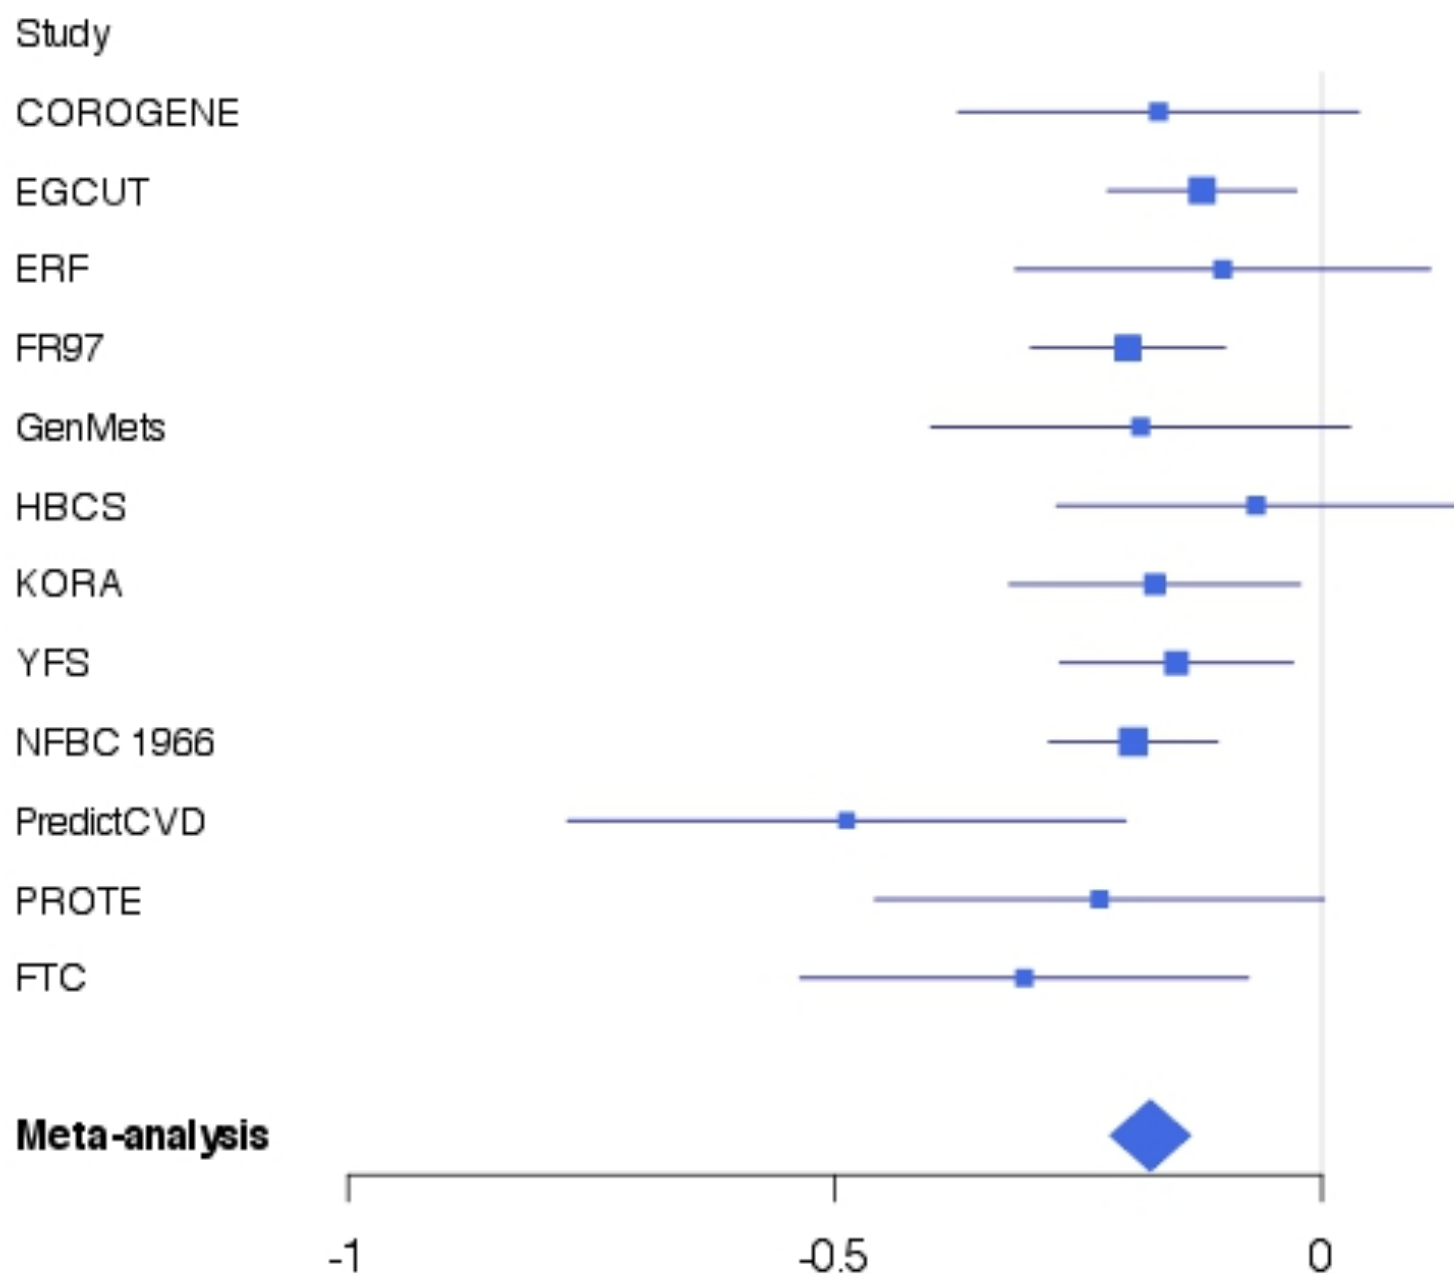

### SNP rs7412, Chr 19, Pos 45412079, L.LDL.FC

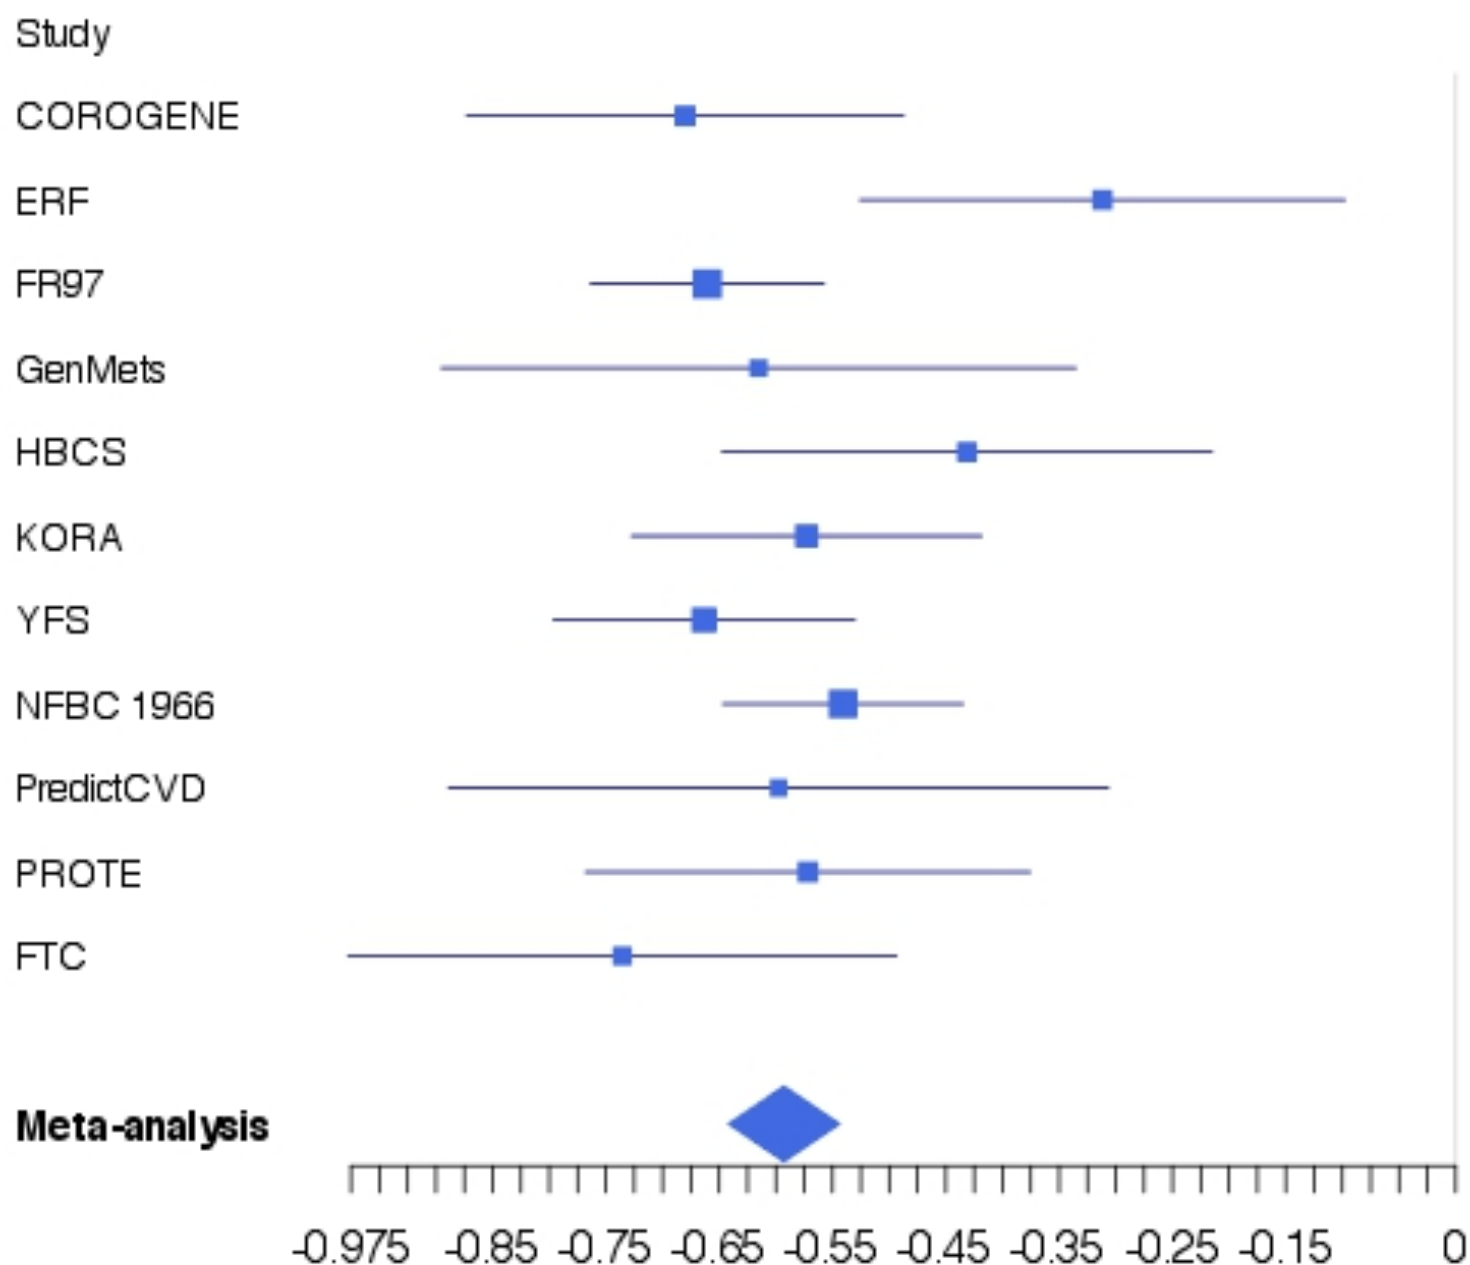

### SNP rs1883711, Chr 20, Pos 39179822, XS.VLDL.PL

Study

COROGENE

EGCUT

FR97

GenMets

HBCS

KORA

YFS

NFBC 1966

PredictCVD

PROTE

FTC

**Meta-analysis**

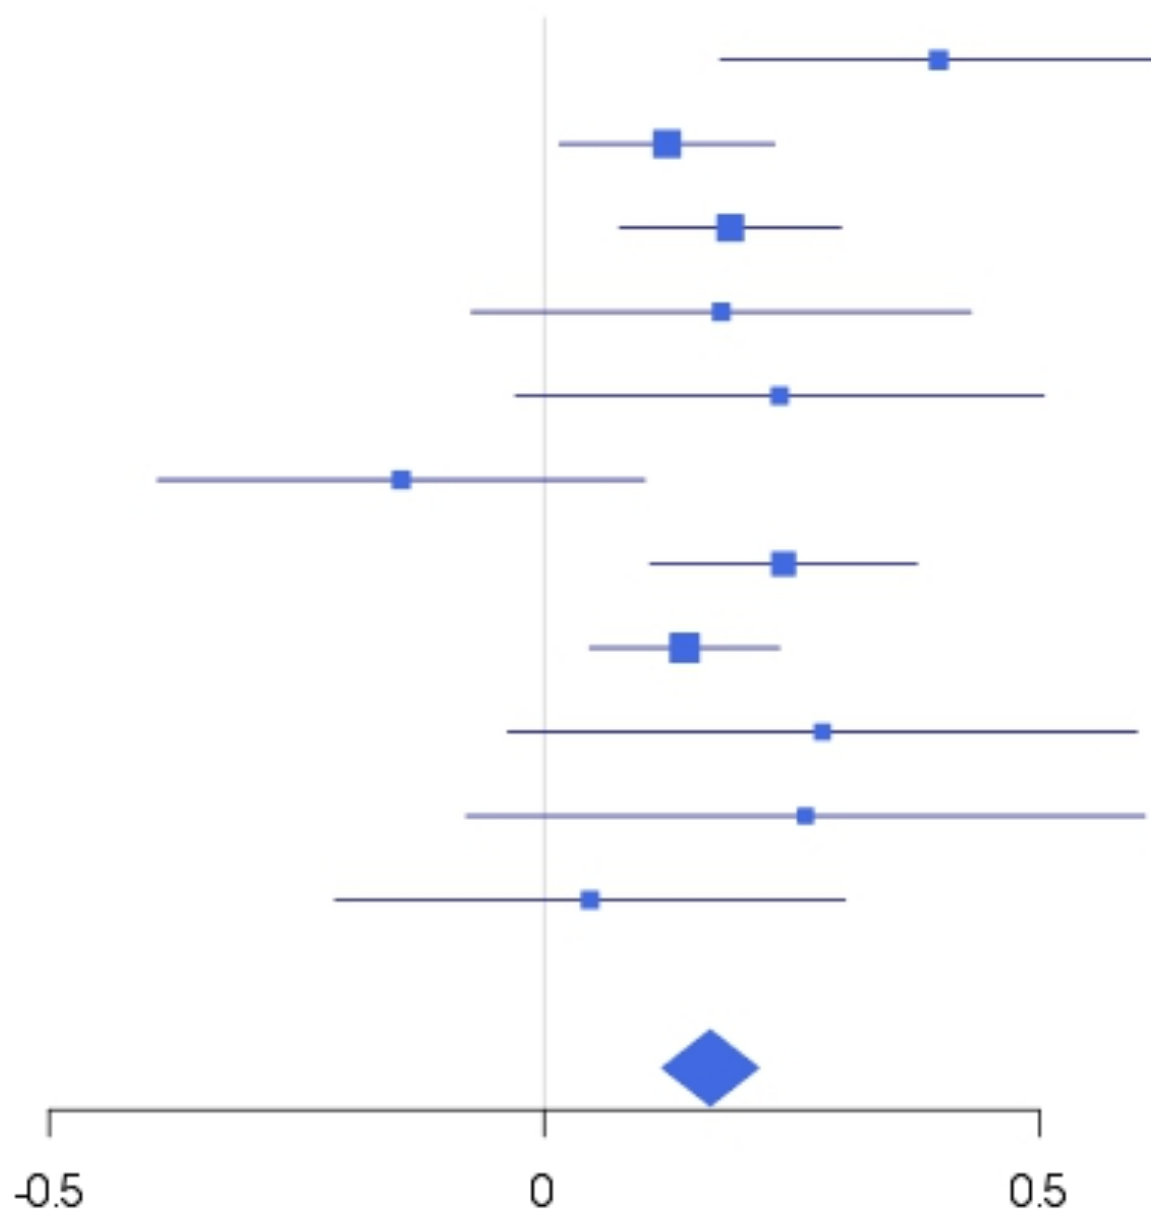

### SNP rs6073958, Chr 20, Pos 44551855, S.HDL.P

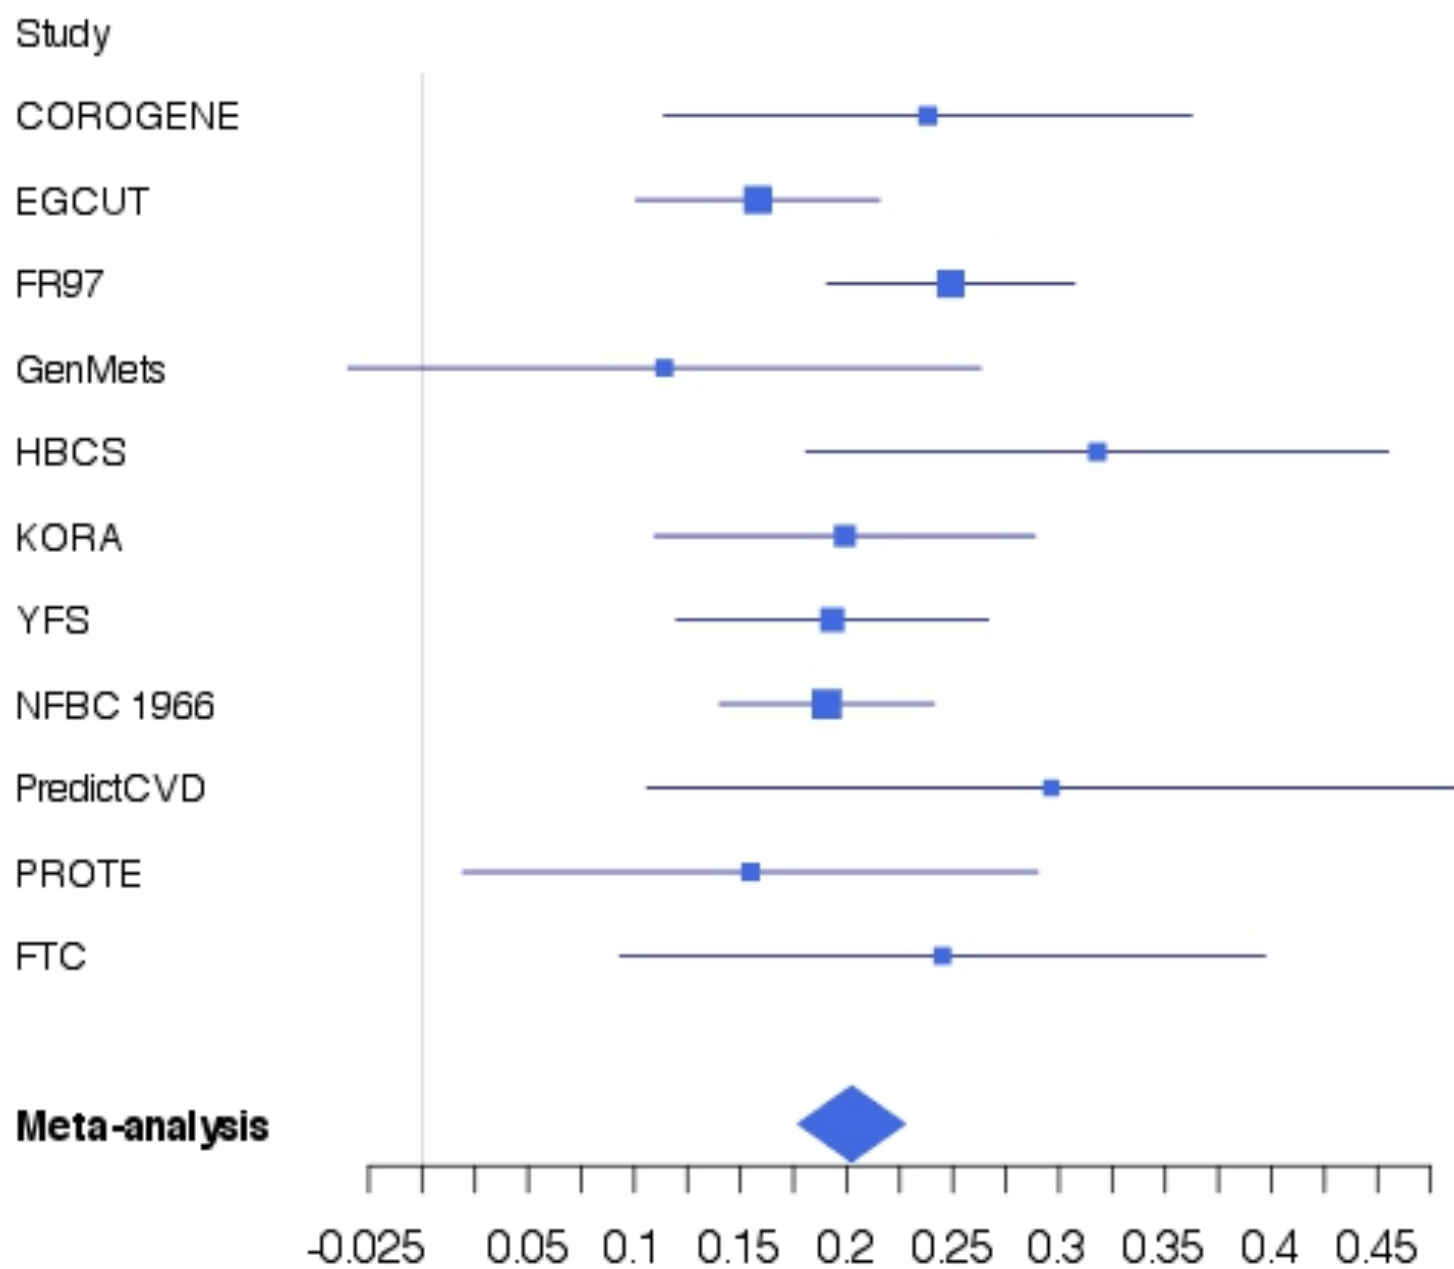

**Supplementary Figure 3.** Representative metabolite-specific original (untransformed) distributions and descriptive statistics (range, mean, median and skewness). The distributions drawn are from the largest cohort NFBC1966 with n = 5923.

# NFBC66 measures summary

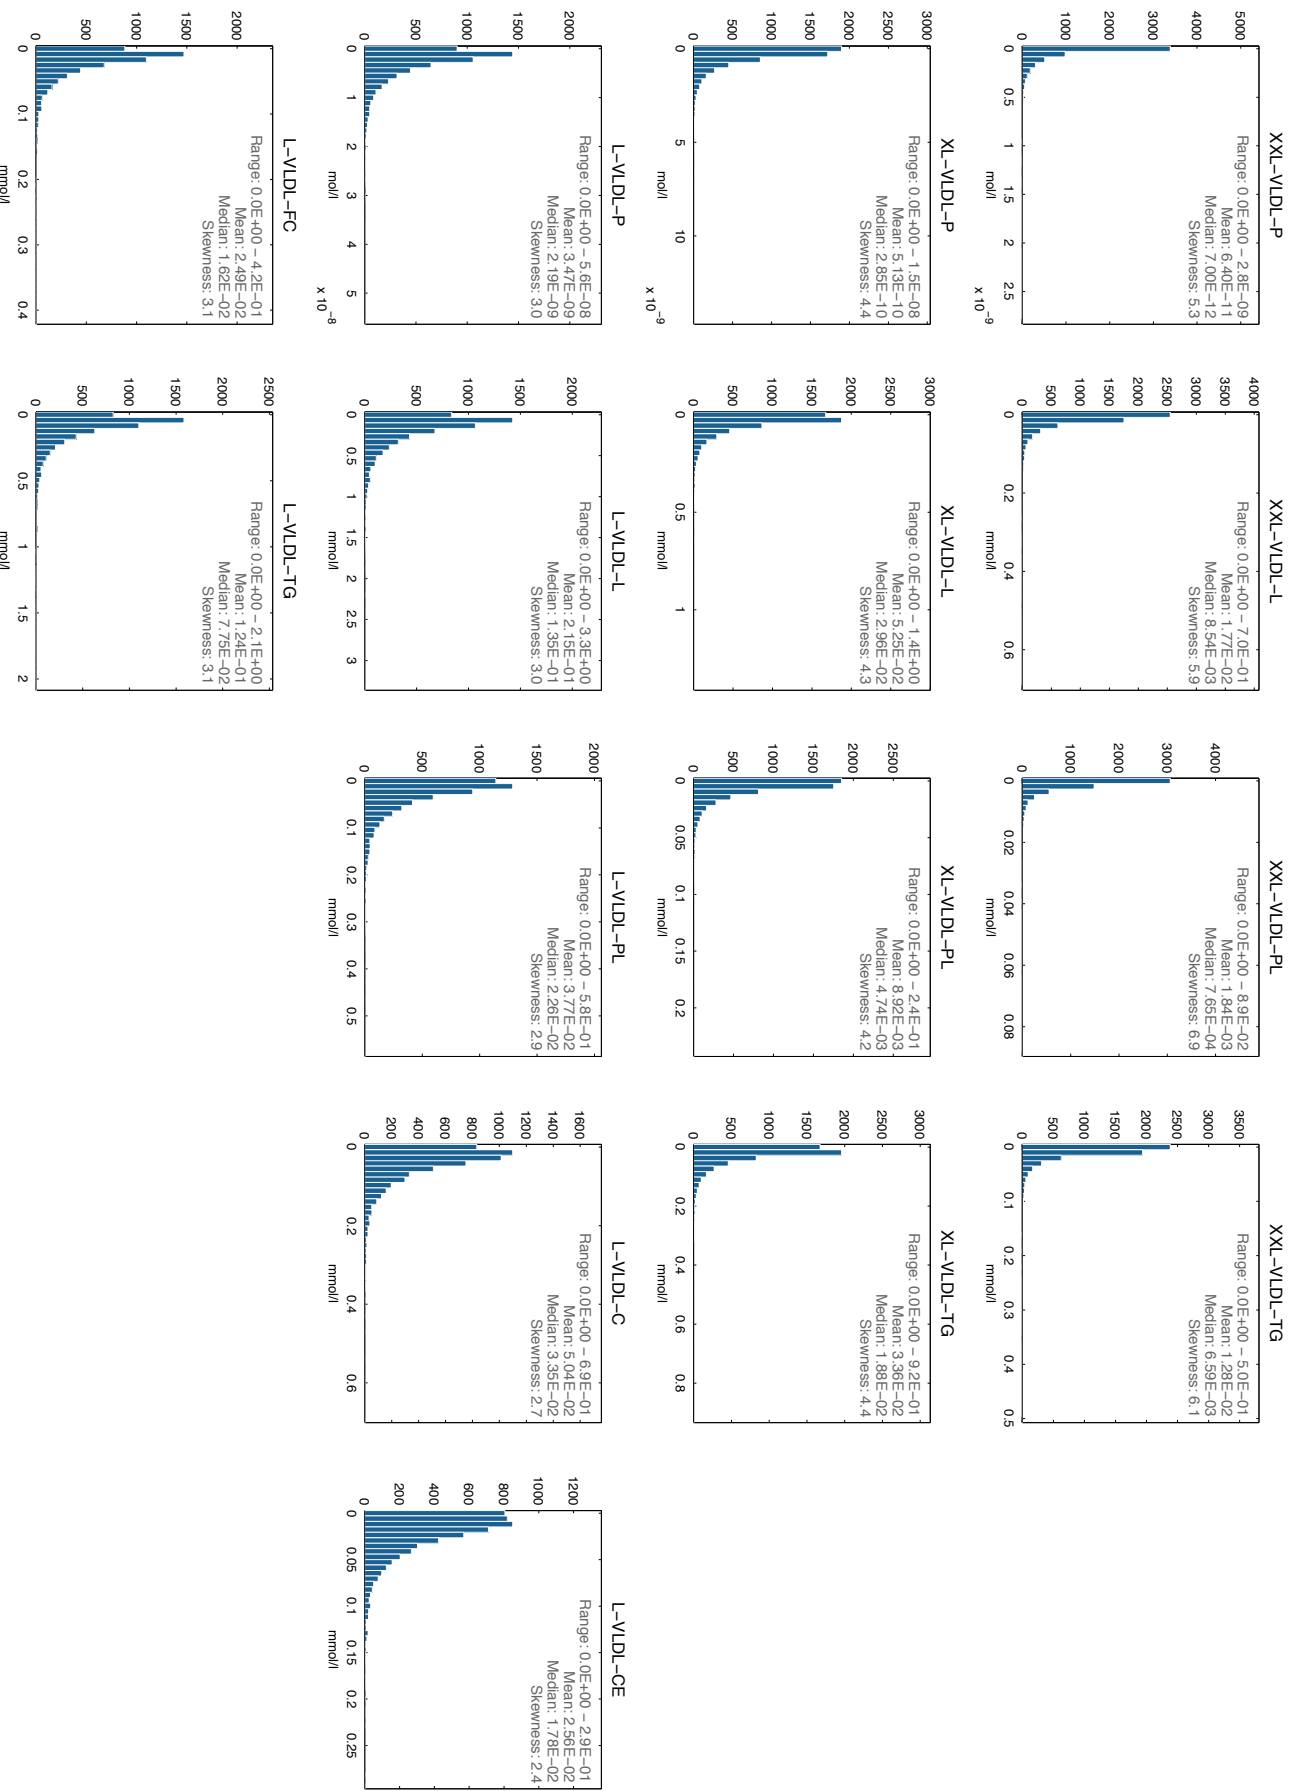

# NFBC66 measures summary

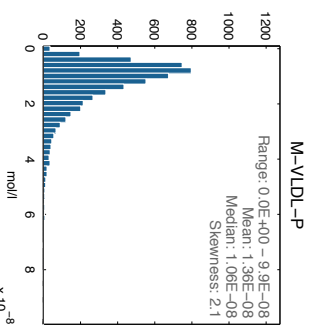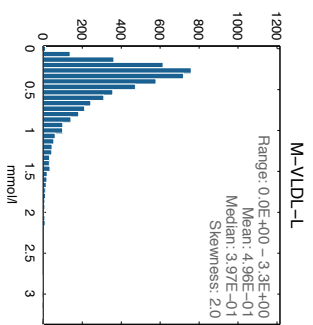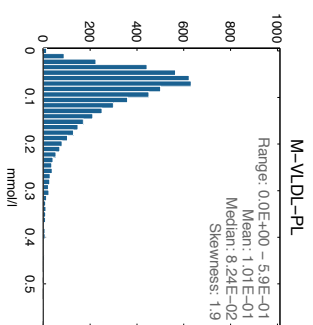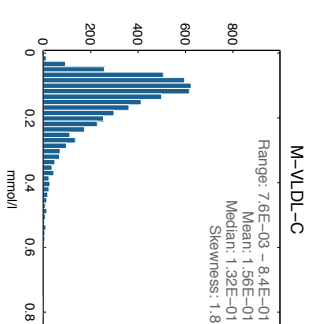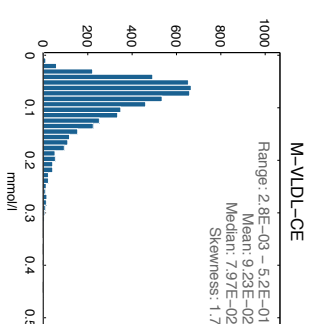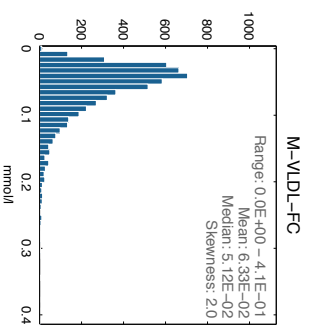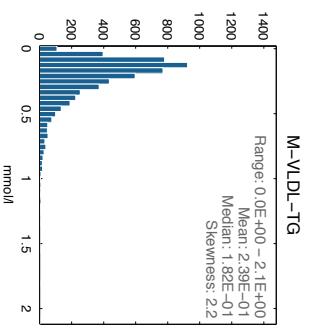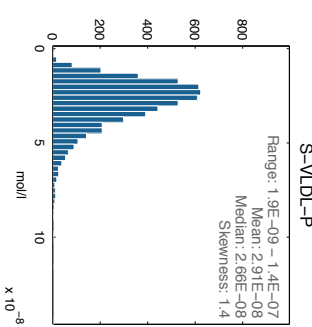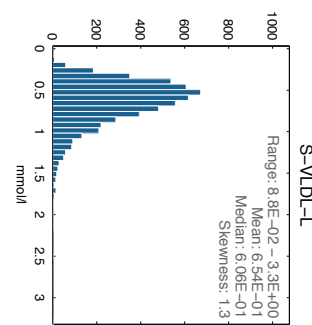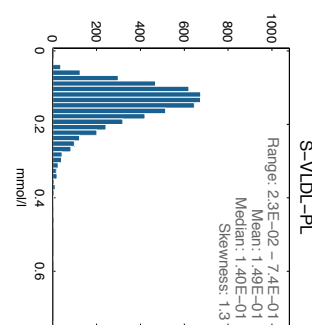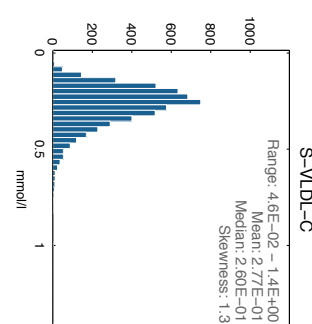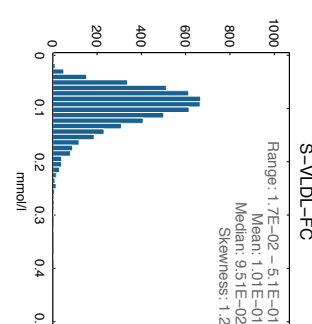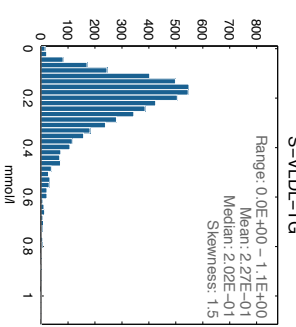



# NFBC66 measures summary

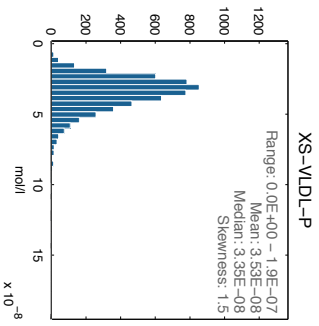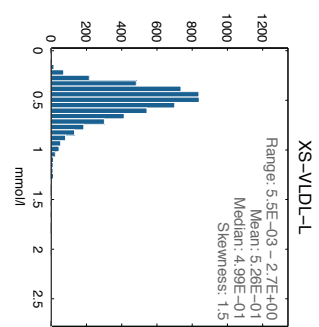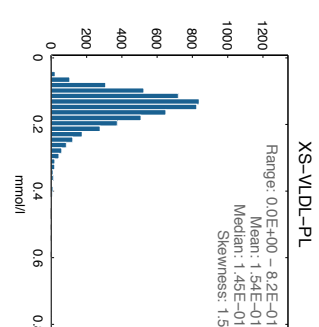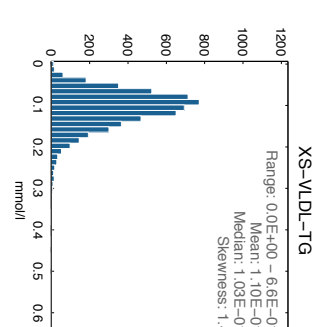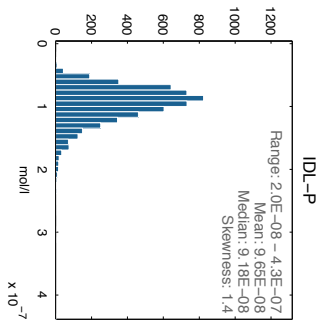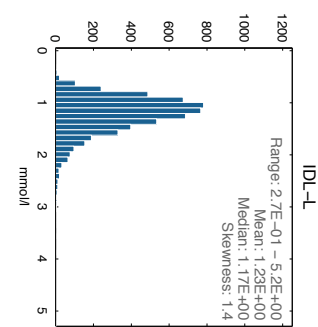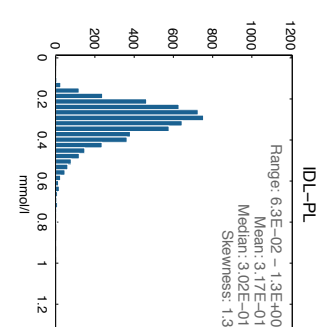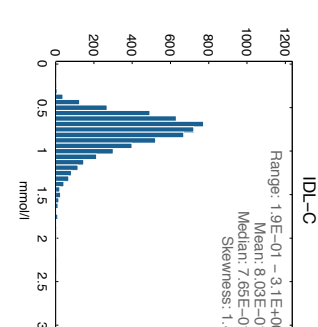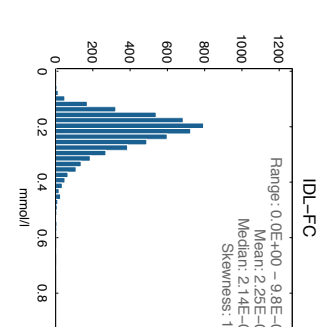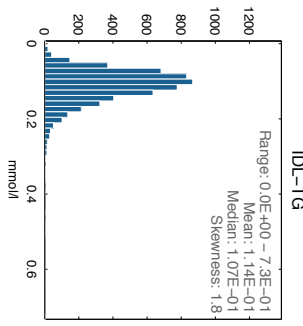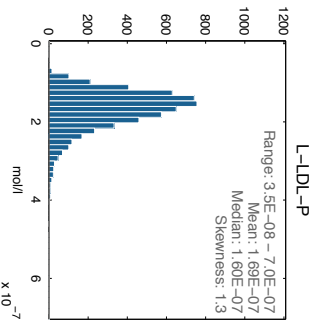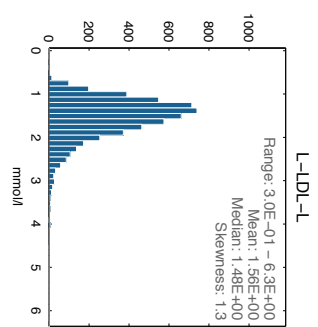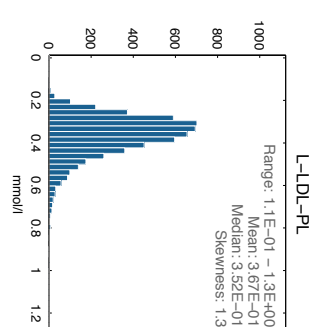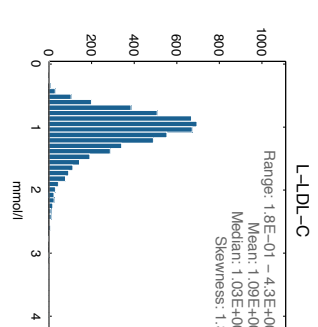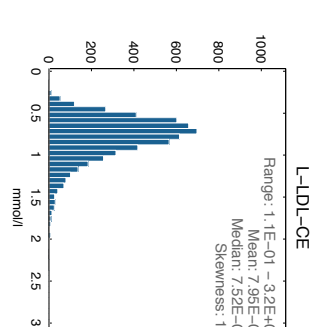

# NFBC66 measures summary

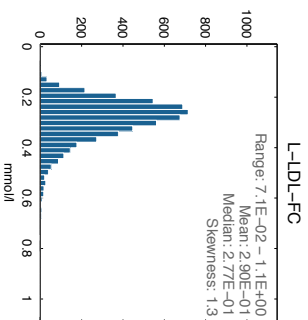

L-LDL-FC

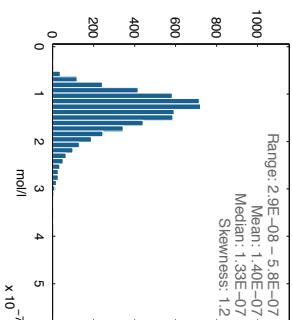

M-LDL-P

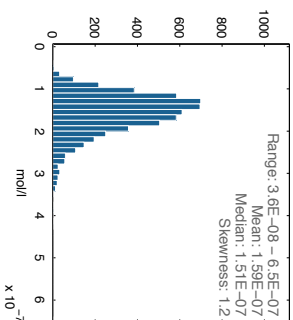

S-LDL-P

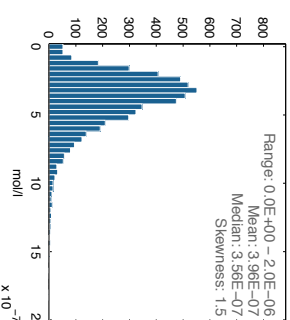

XL-HDL-P

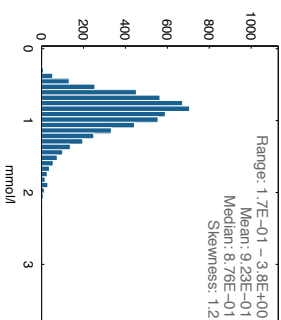

M-LDL-L

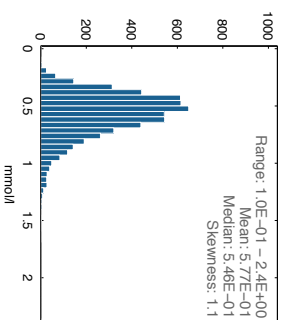

S-LDL-L

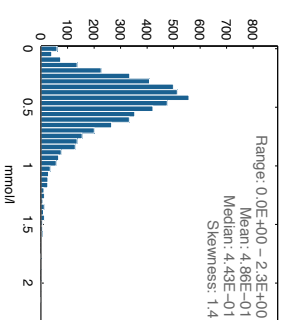

XL-HDL-L

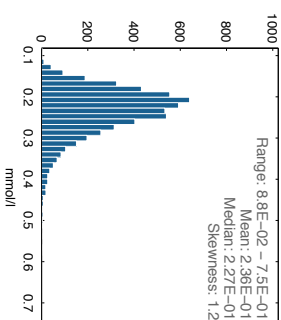

M-LDL-PL

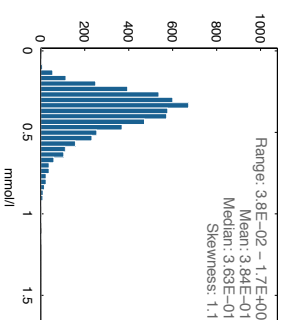

S-LDL-C

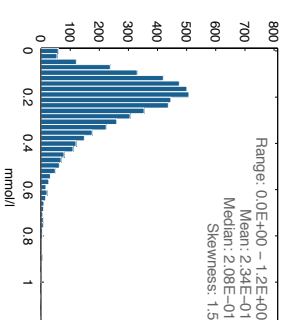

XL-HDL-PL

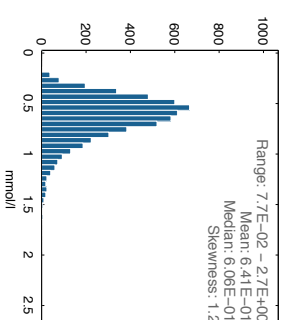

M-LDL-C

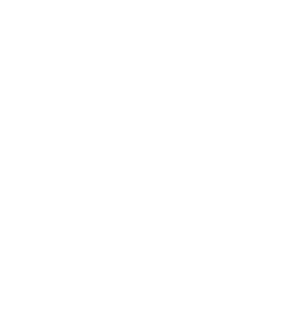

XL-HDL-C

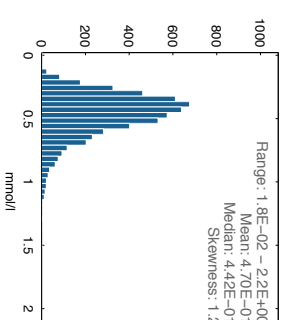

M-LDL-CE

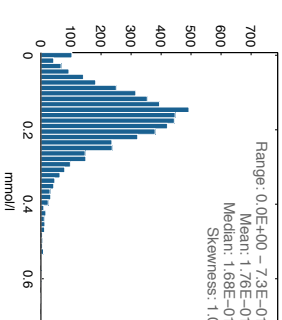

XL-HDL-CE

# NFBC66 measures summary

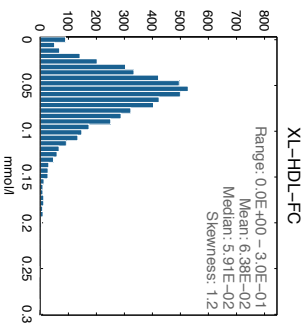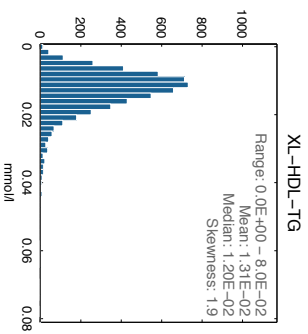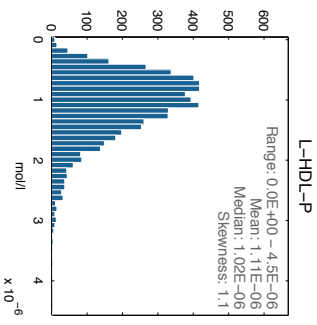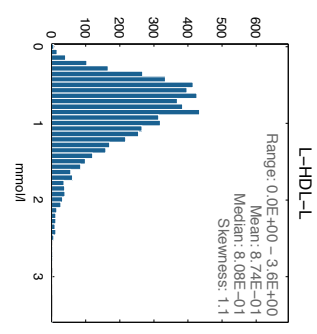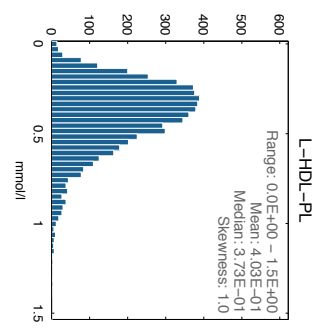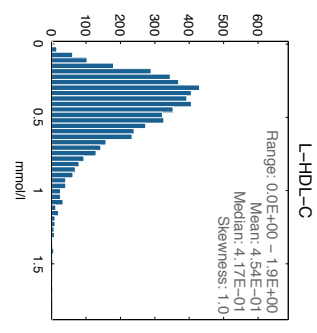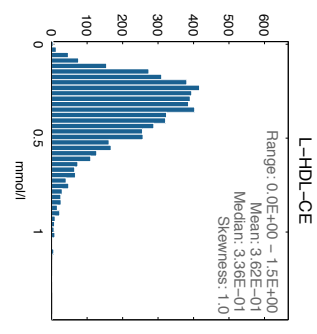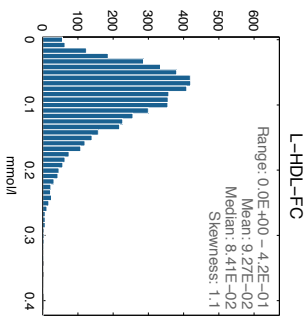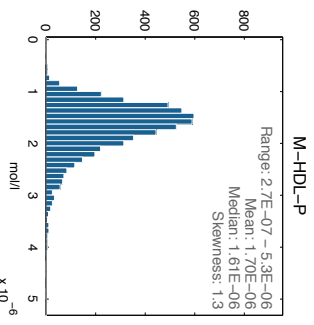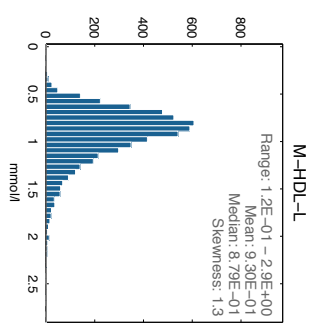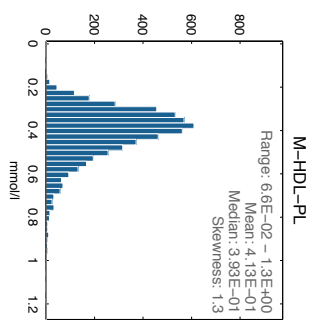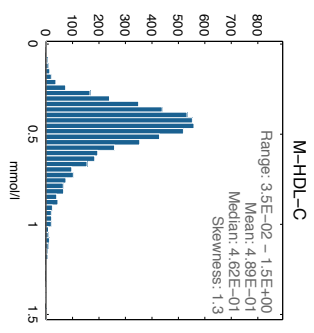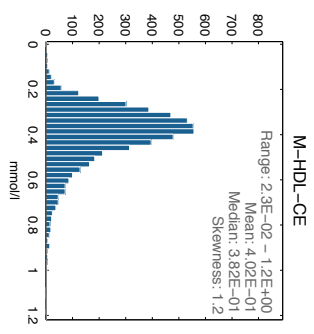

# NFBC66 measures summary

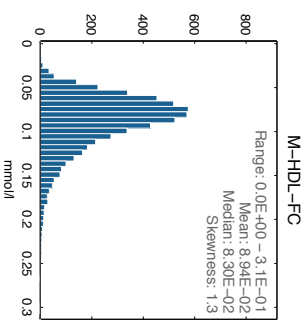

S-HDL-P

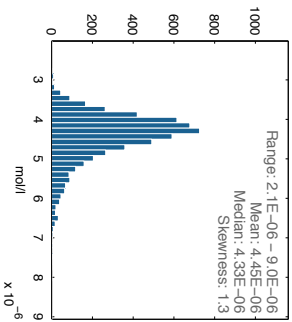

S-HDL-L

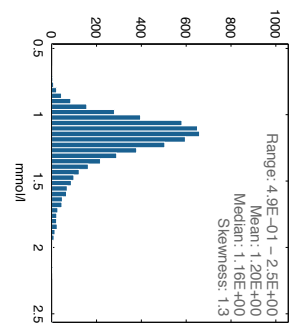

S-HDL-TG

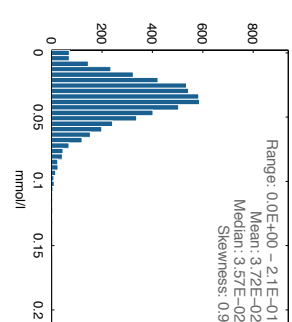

VLDL-D

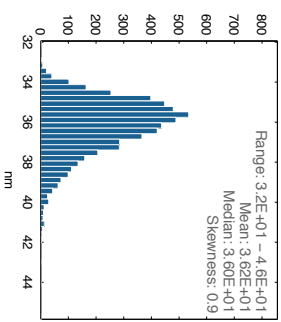

LDL-D

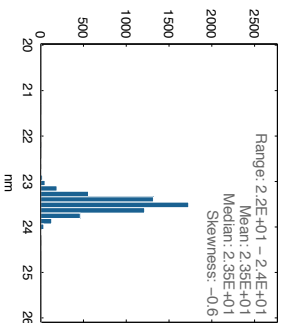

HDL-D

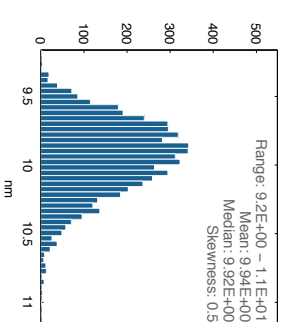

Total cholesterol

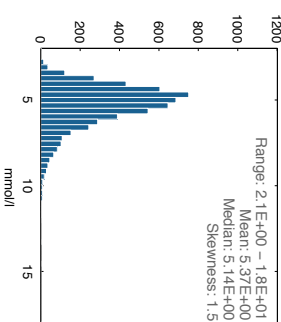

Est-C

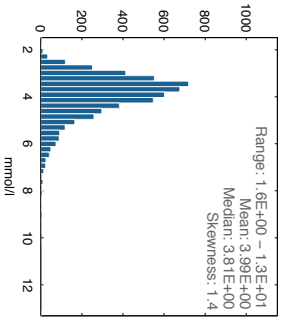

Free-C

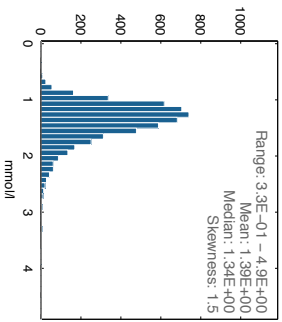

LDL-C

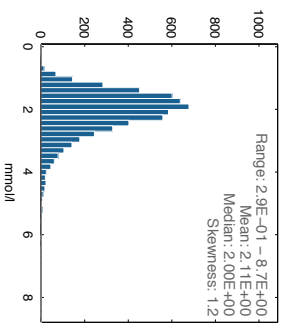

HDL-C

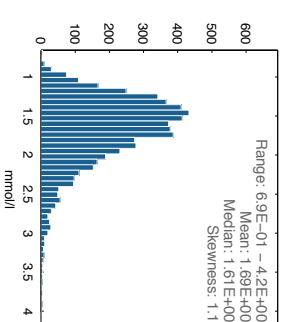

Triglycerides

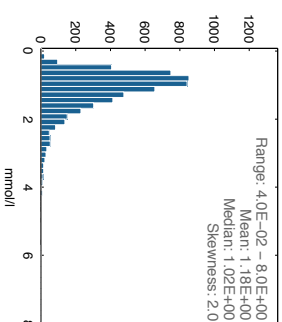

TotPG

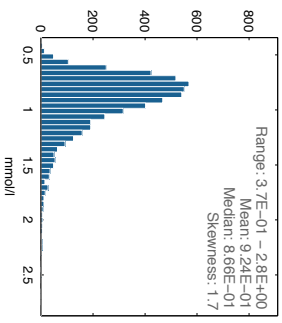

# NFBC66 measures summary

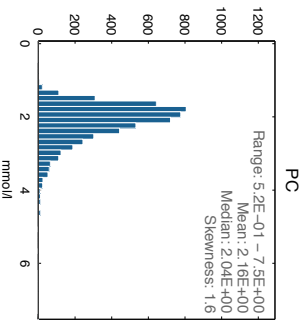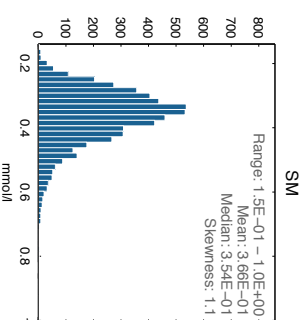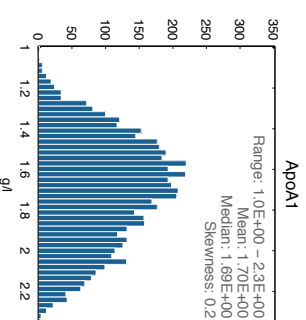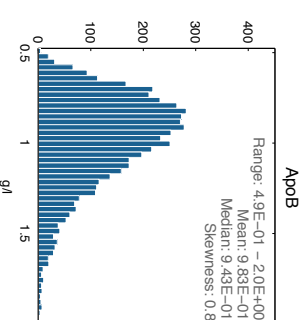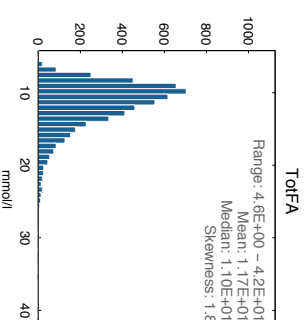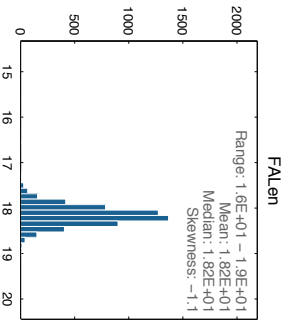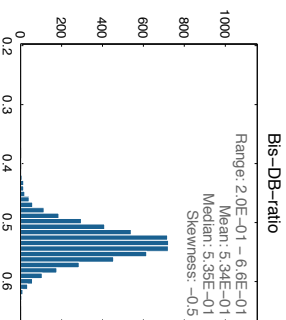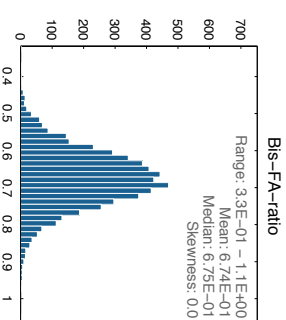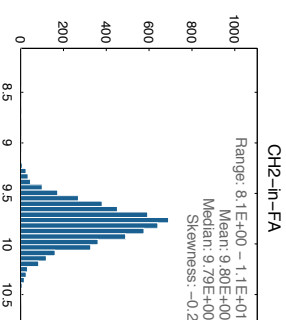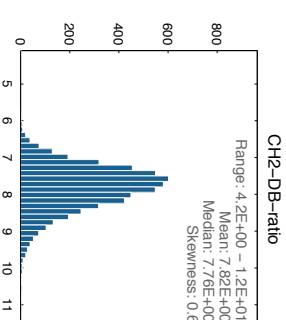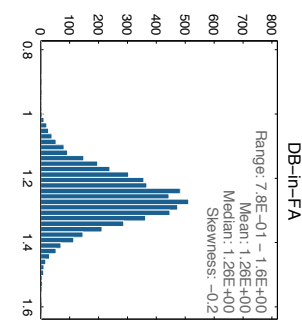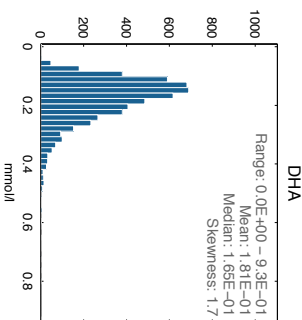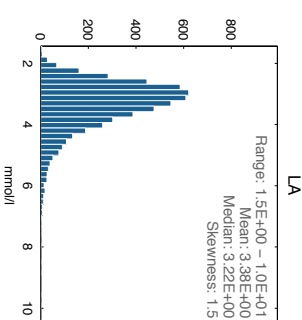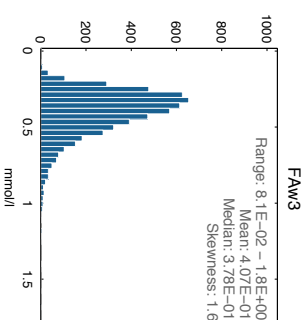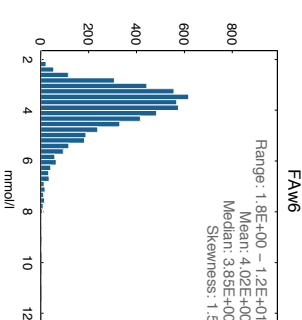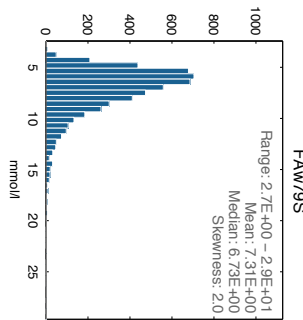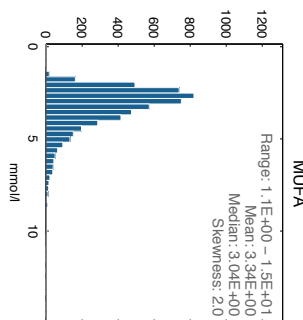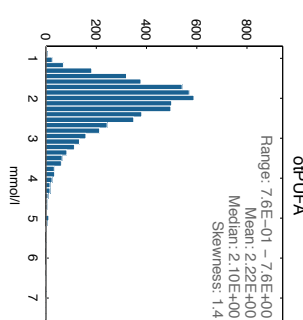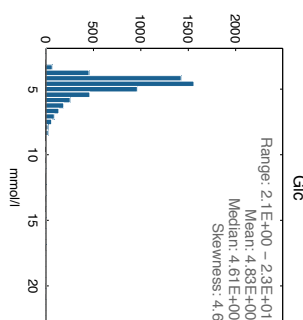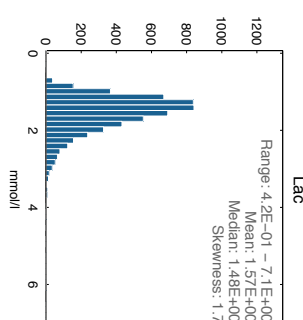

# NFBC66 measures summary

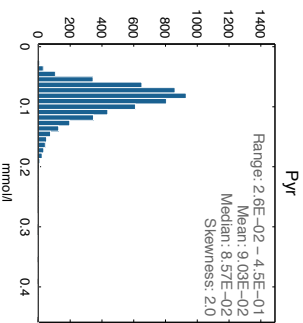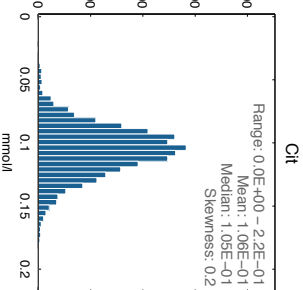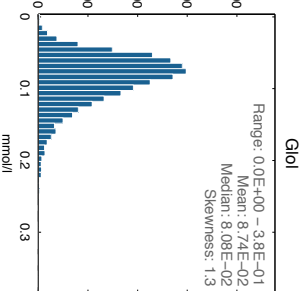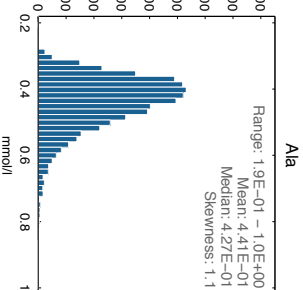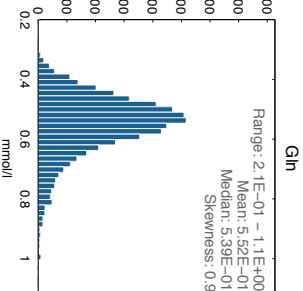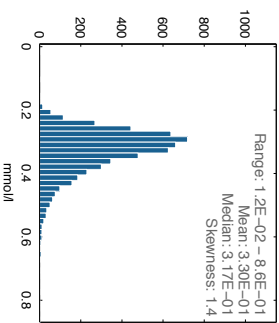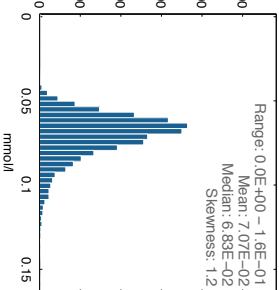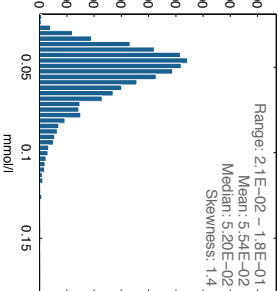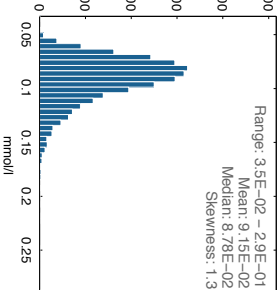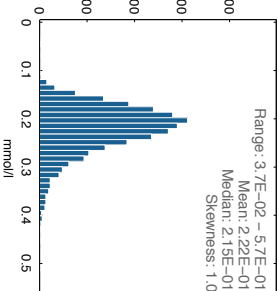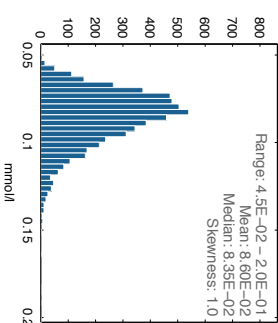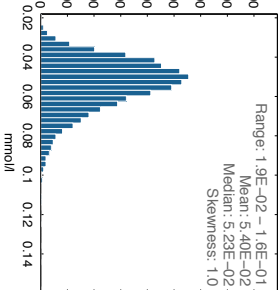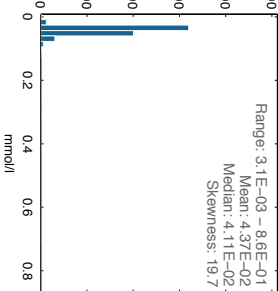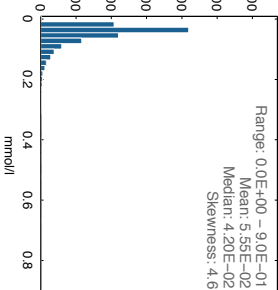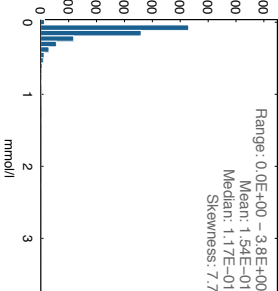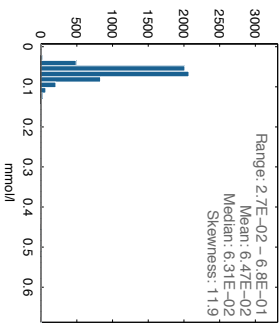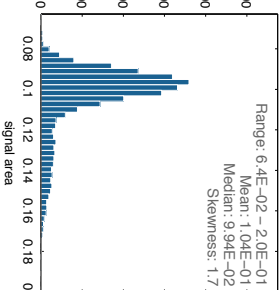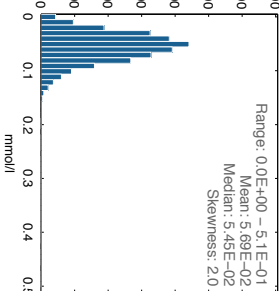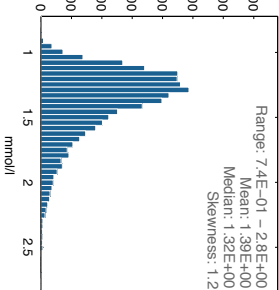

**Supplementary Figure 4.** Metabolite-specific original (untransformed) distributions and descriptive statistics (for each metabolite; range, mean, median, relative standard deviation and skewness) from ERF cohort (N = 2118) for available metabolic measures.

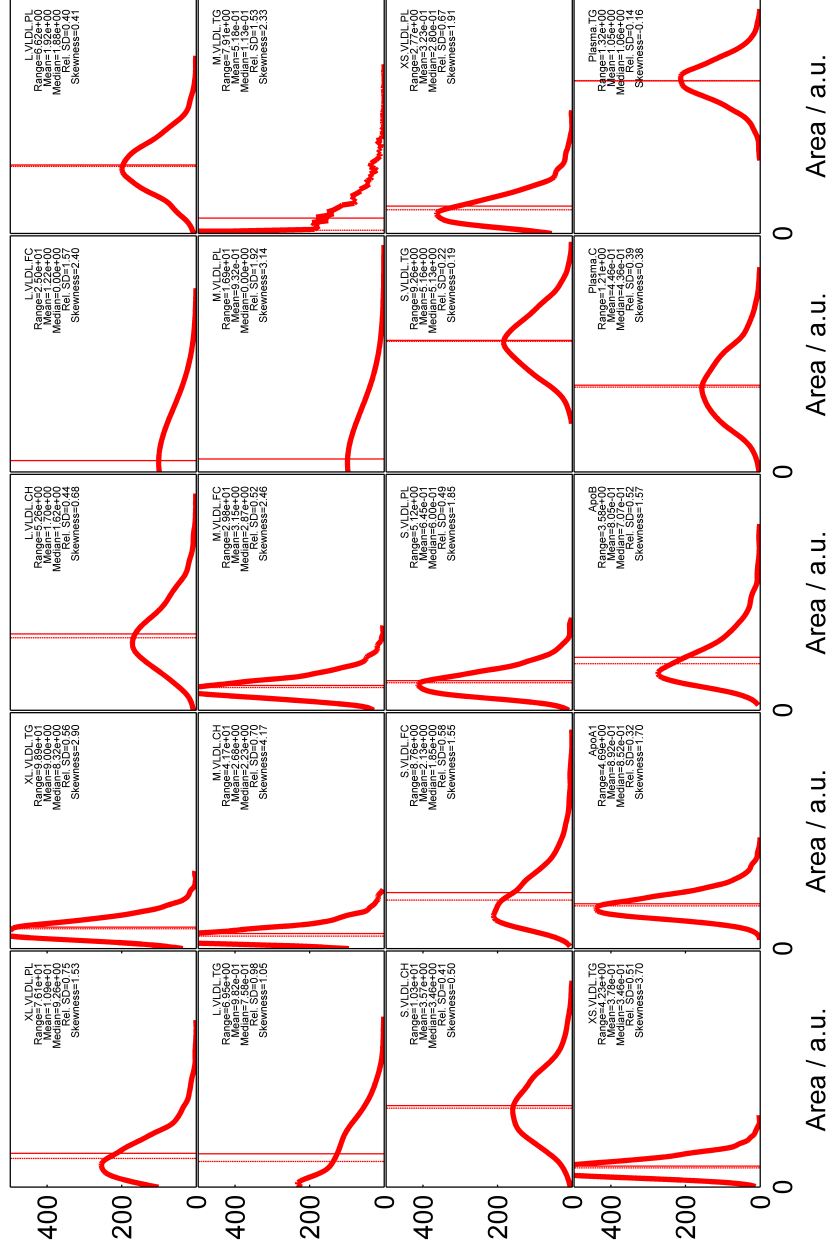



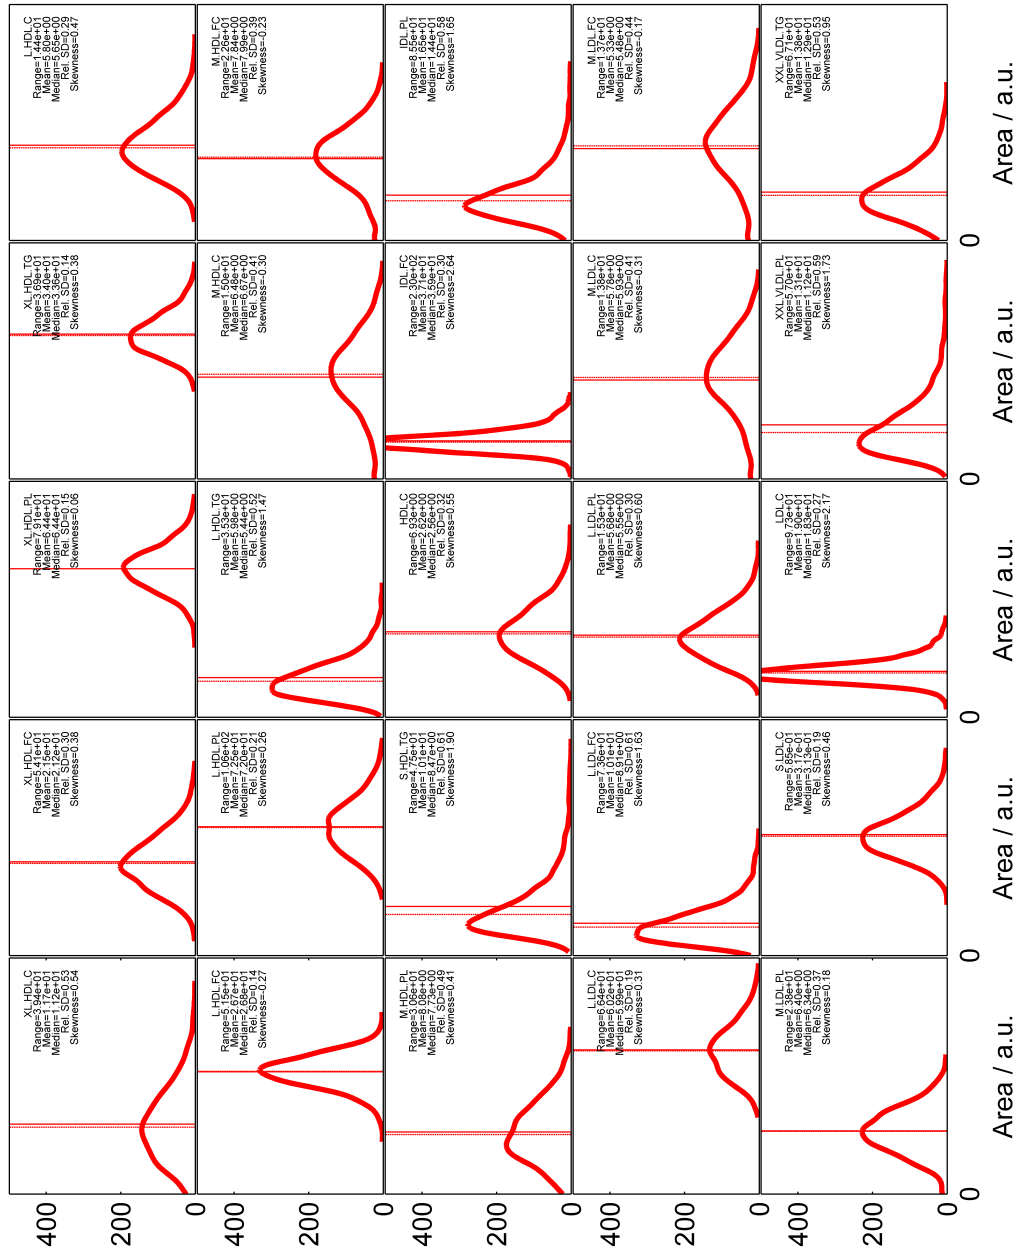

Area / a.u.

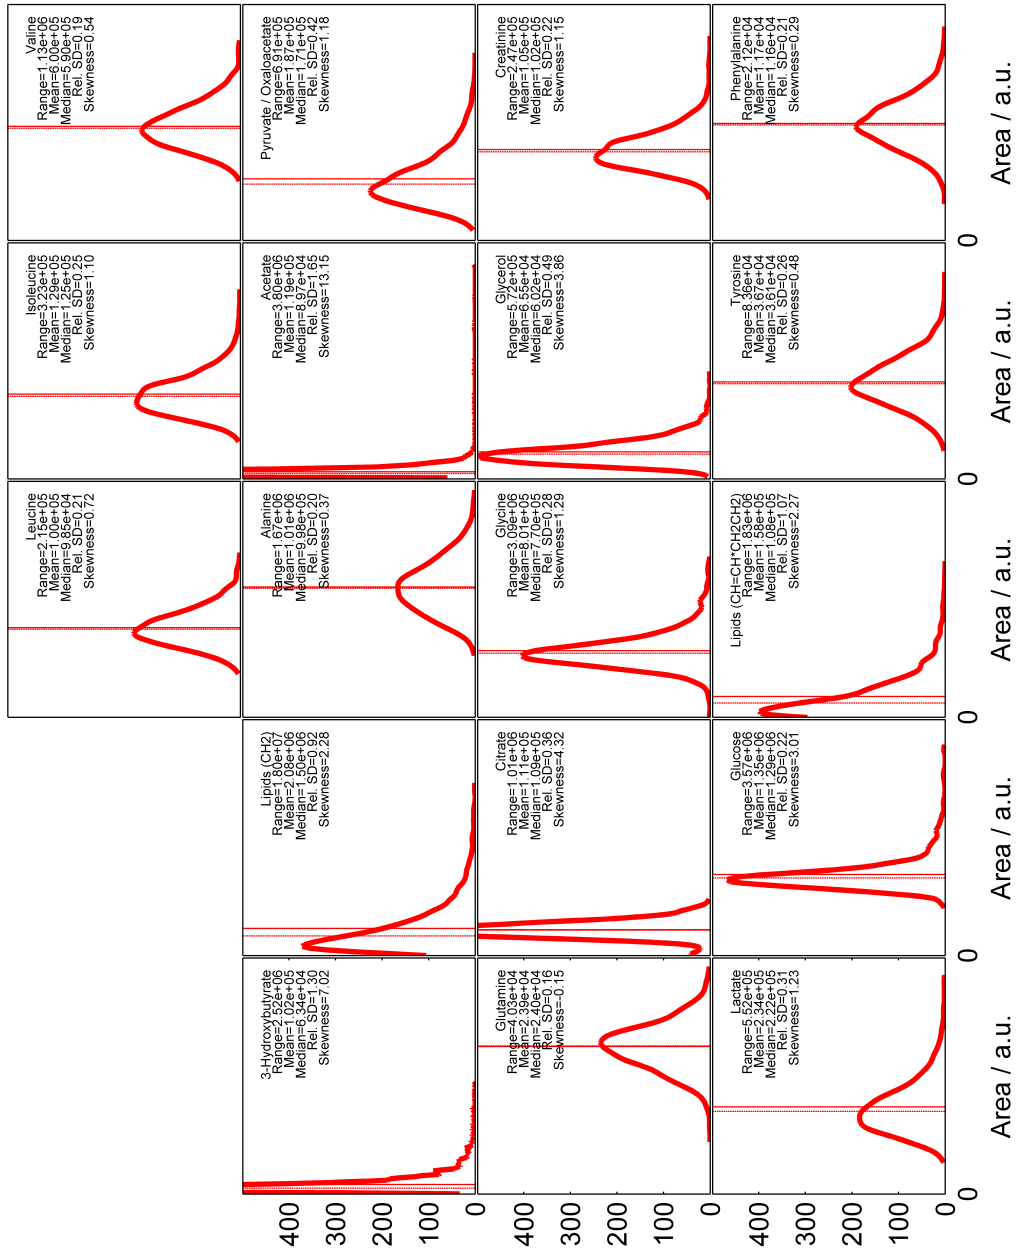

**Supplementary Figure 5.** Quantile plots for all traits. The p-value has been truncated at  $1 \times 10^{-14}$  to allow the visualization of over all inflation, i.e. observed distribution departing from expected already at large p-value distribution. The smallest p-value of the distribution is given in the upper part of each figure.

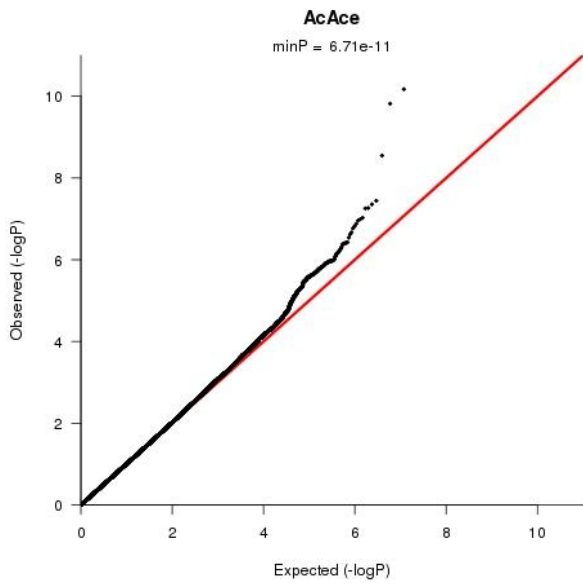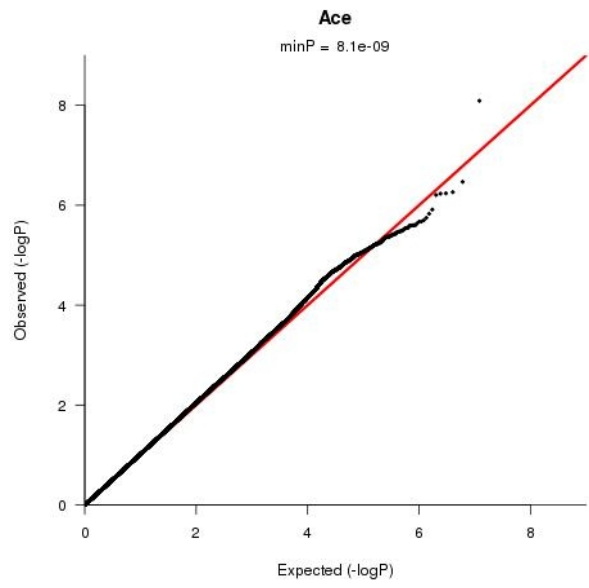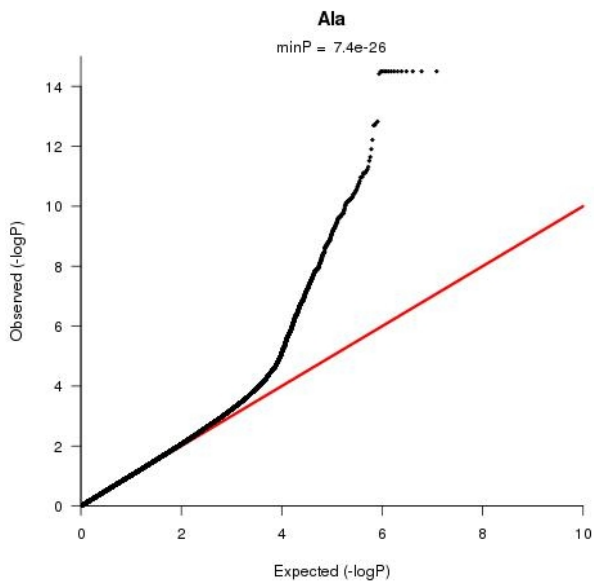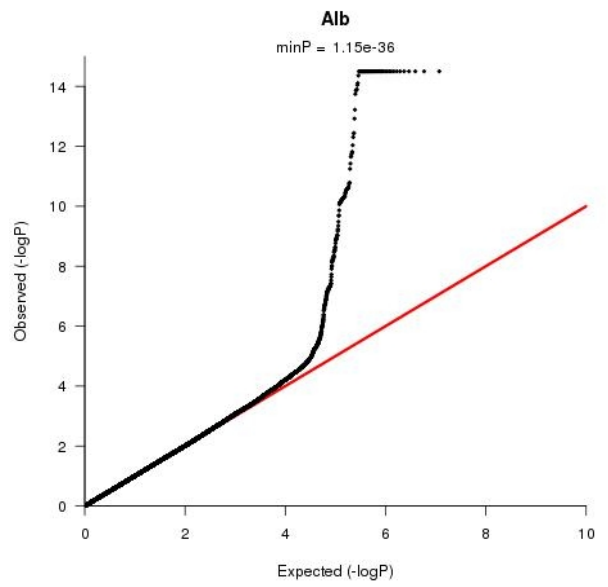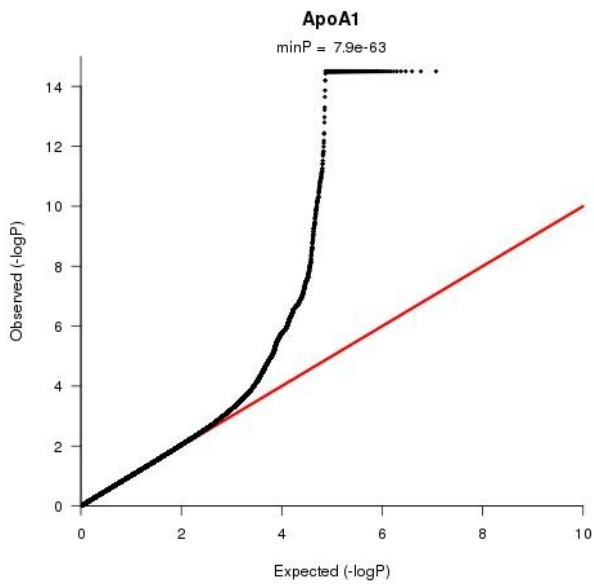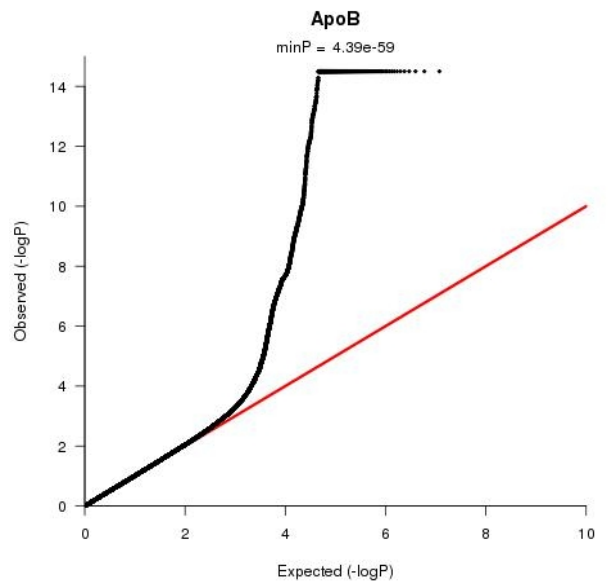

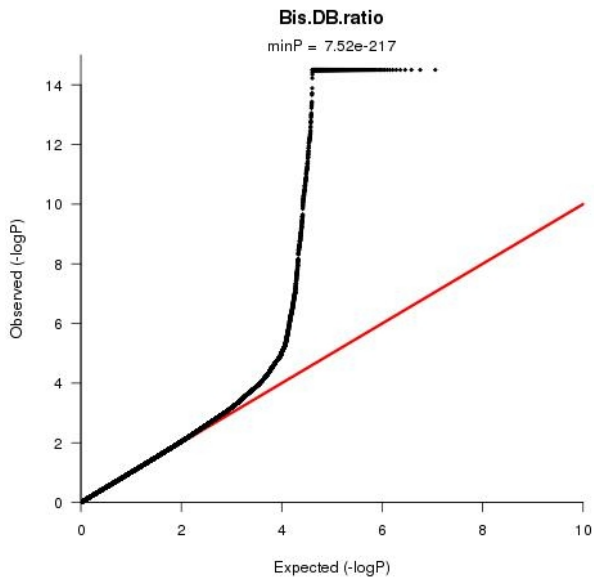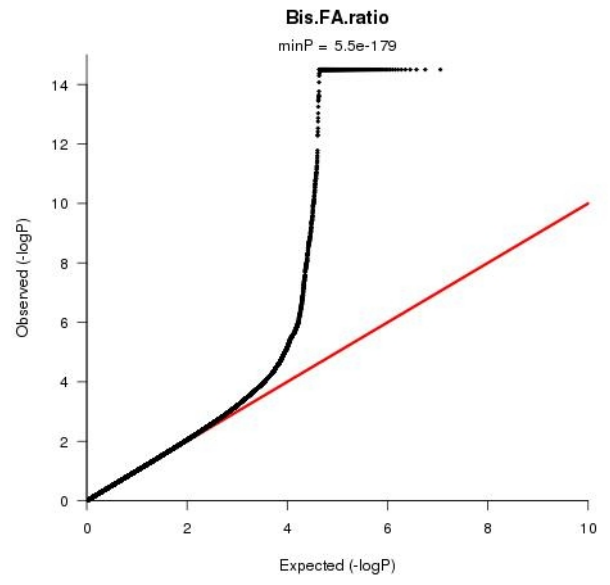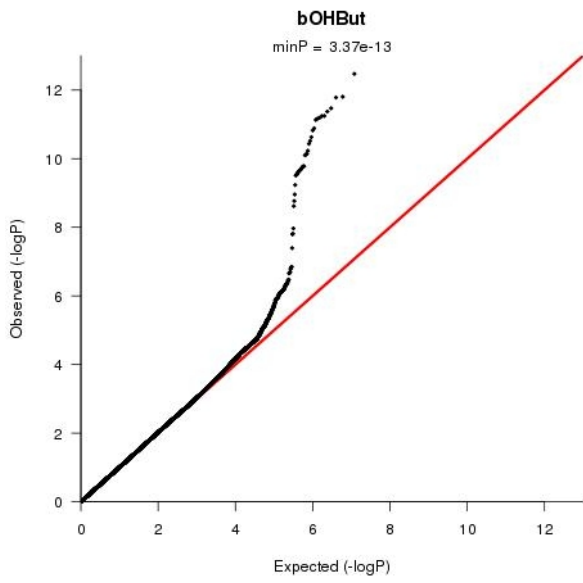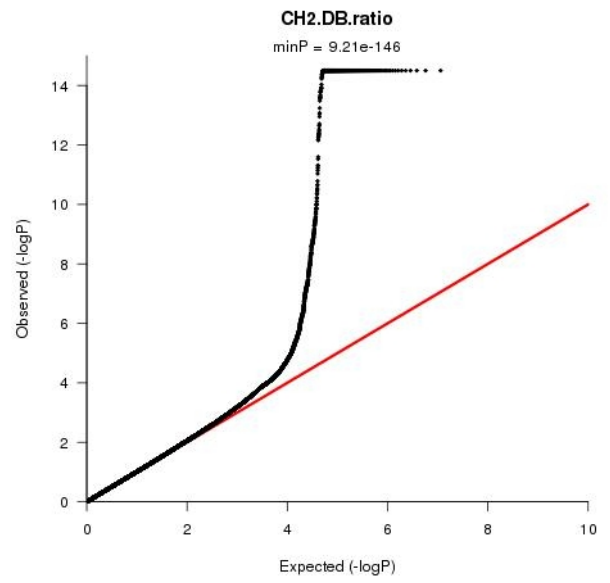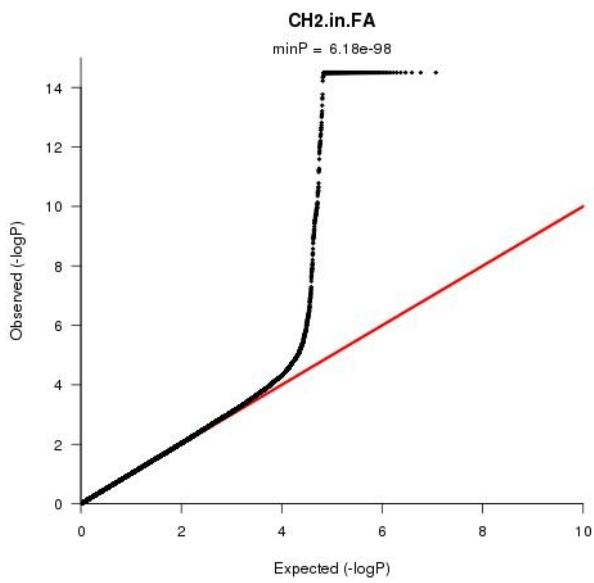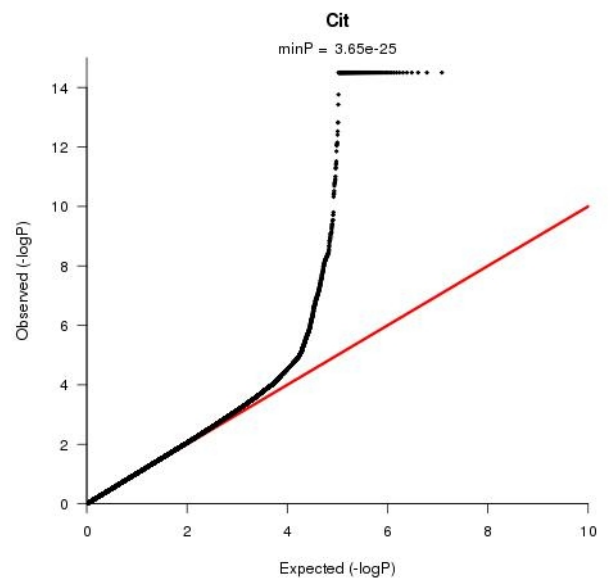

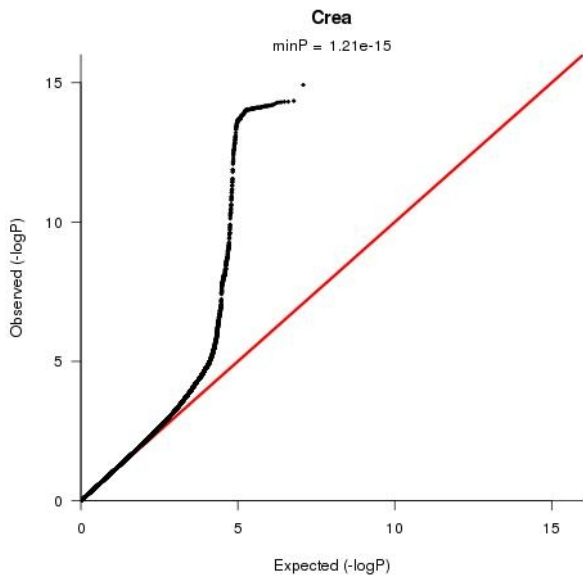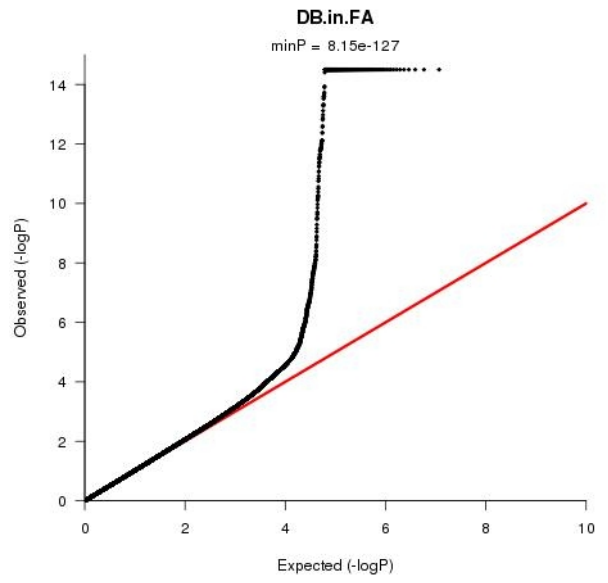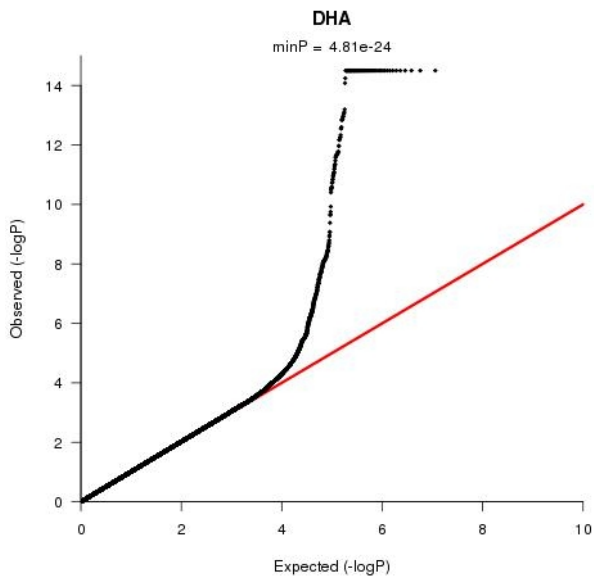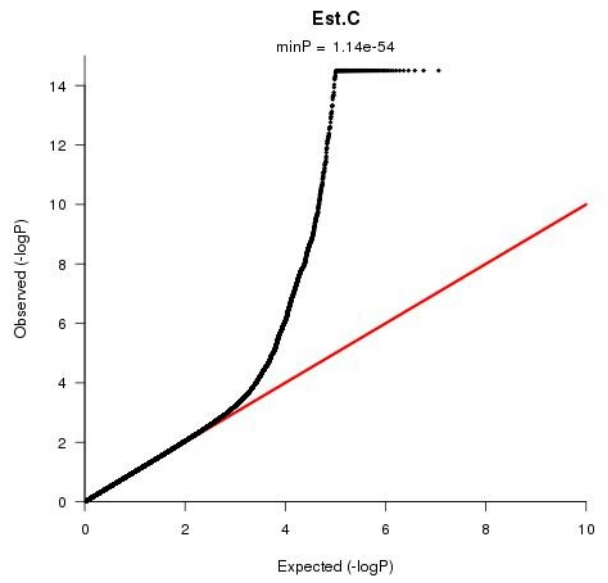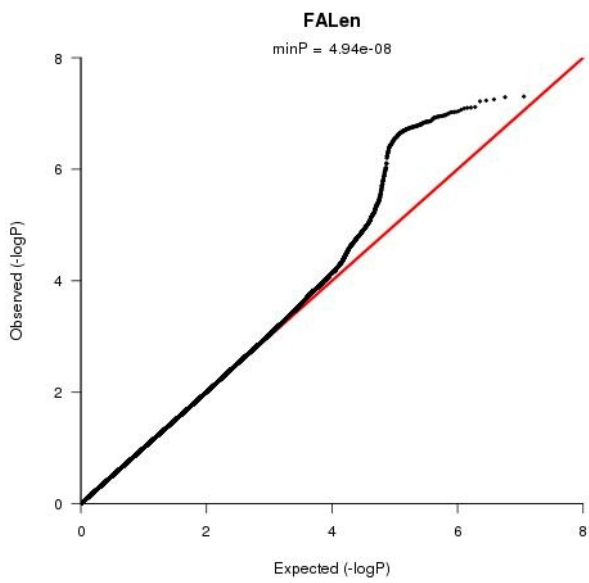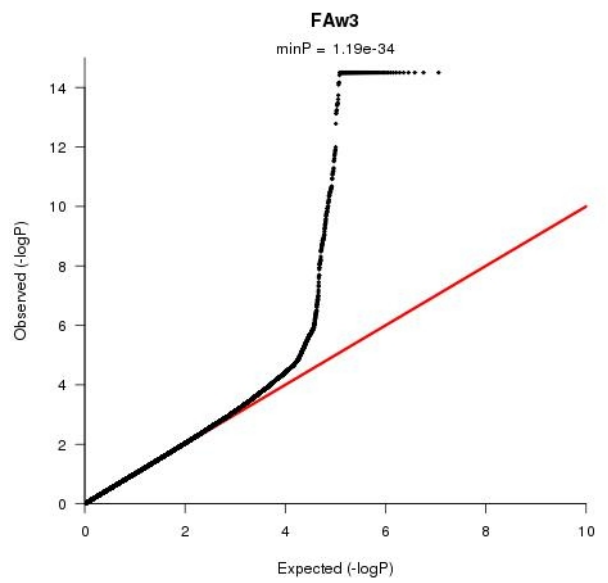

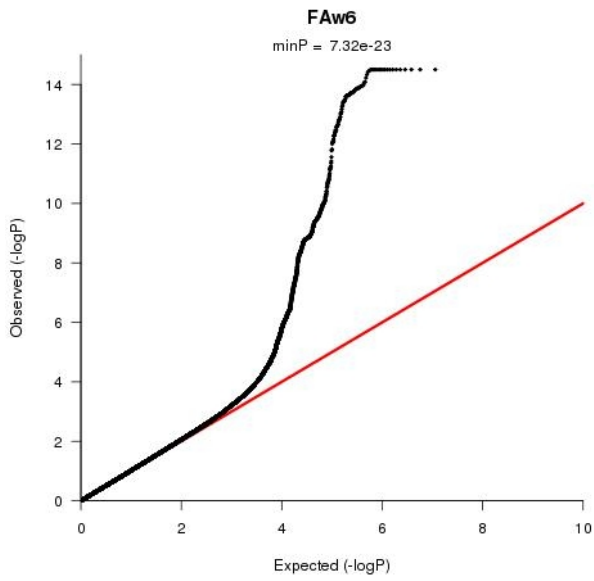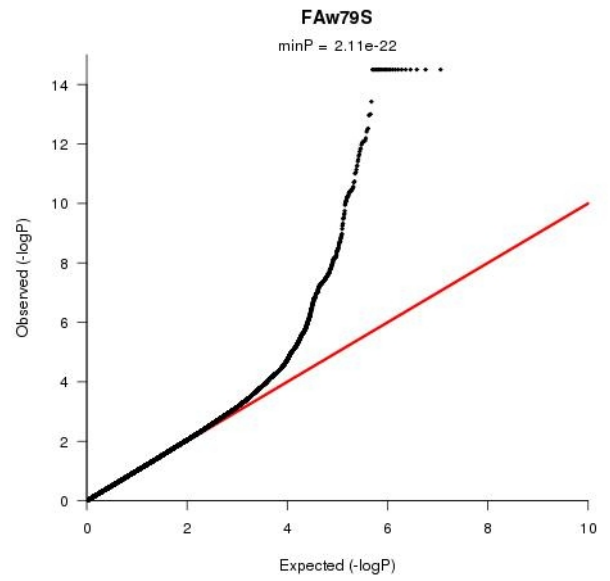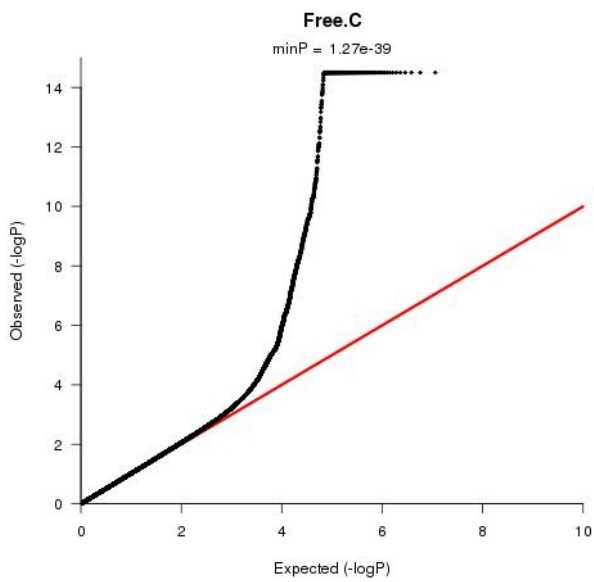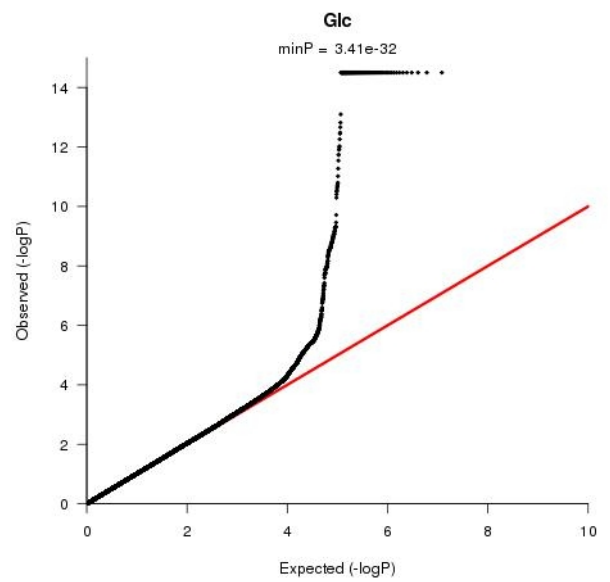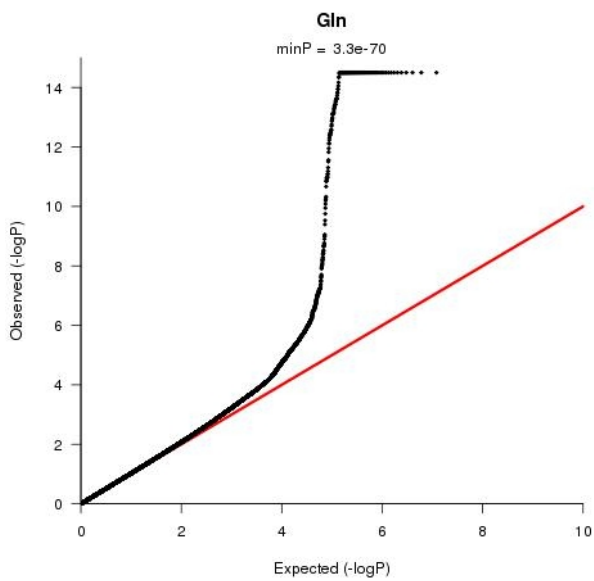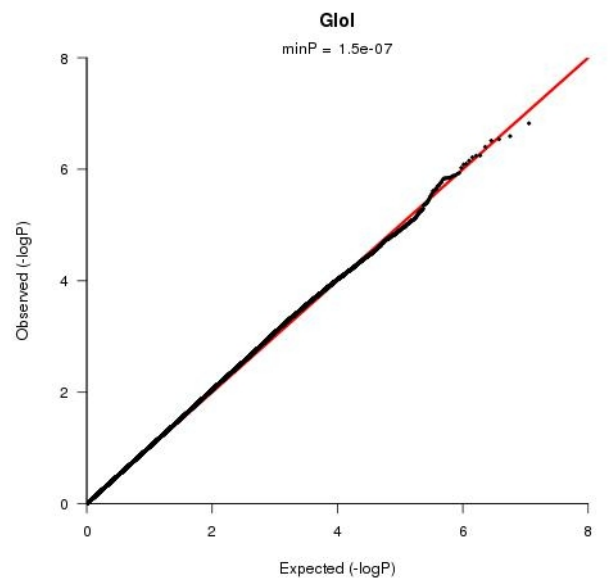

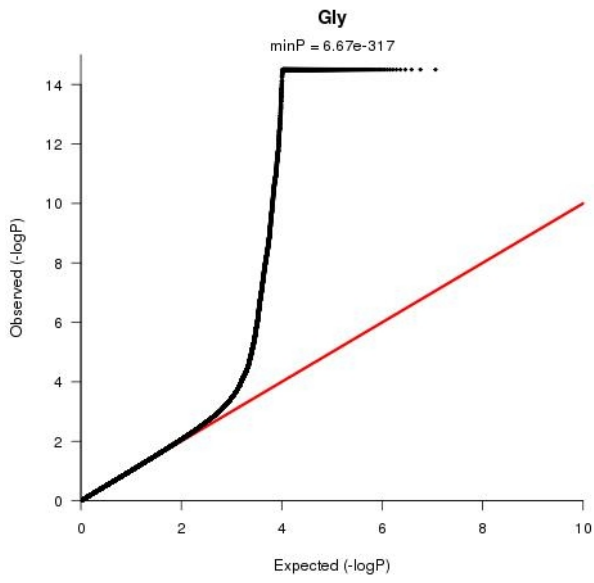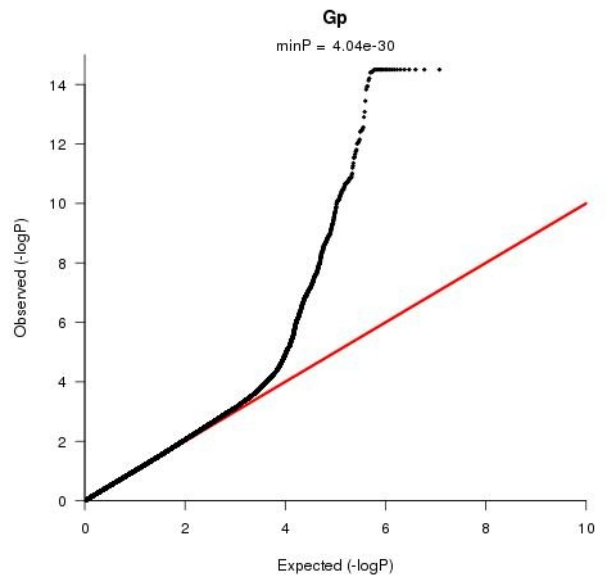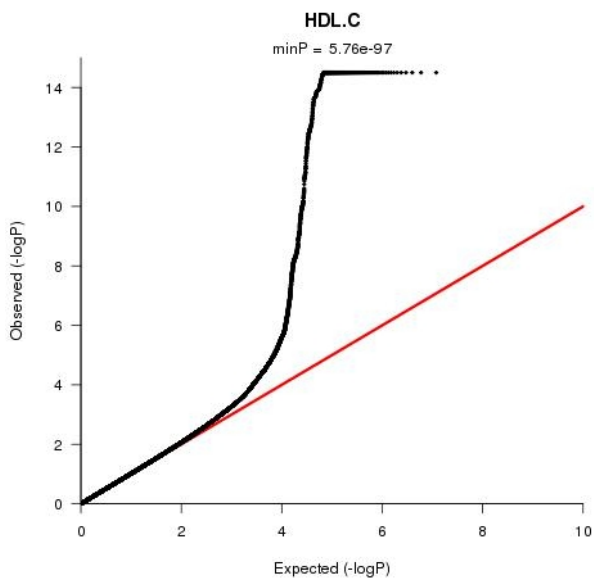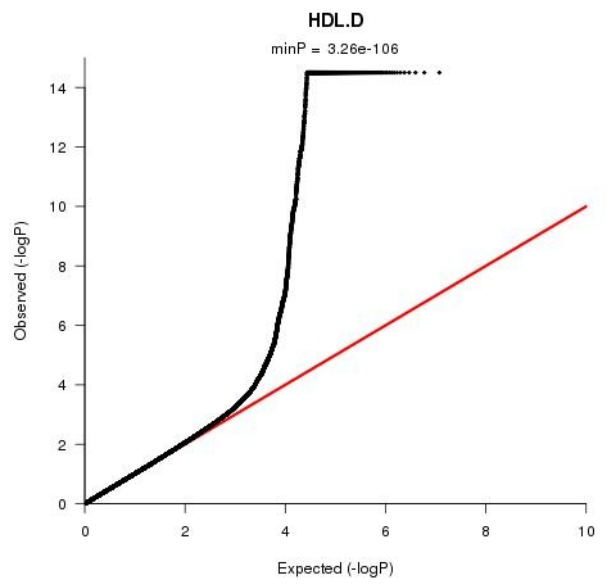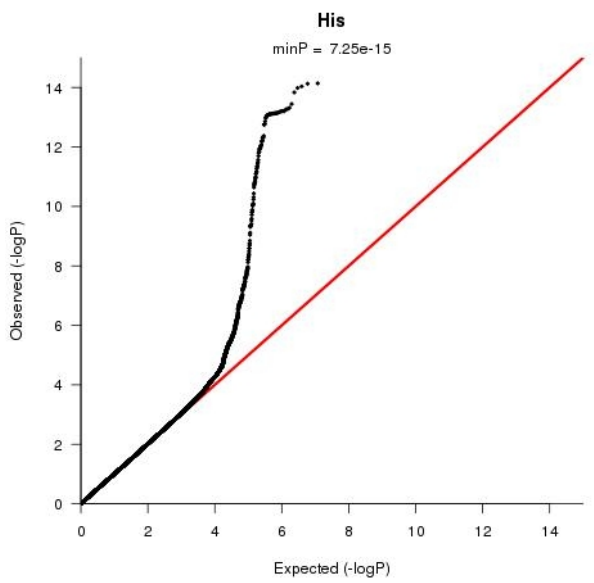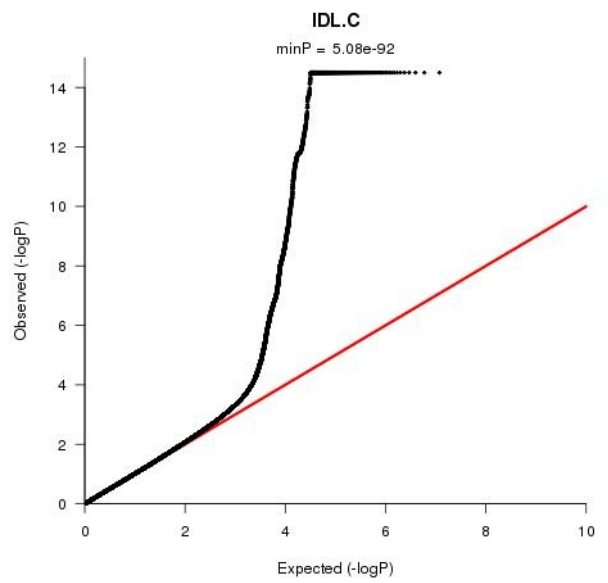



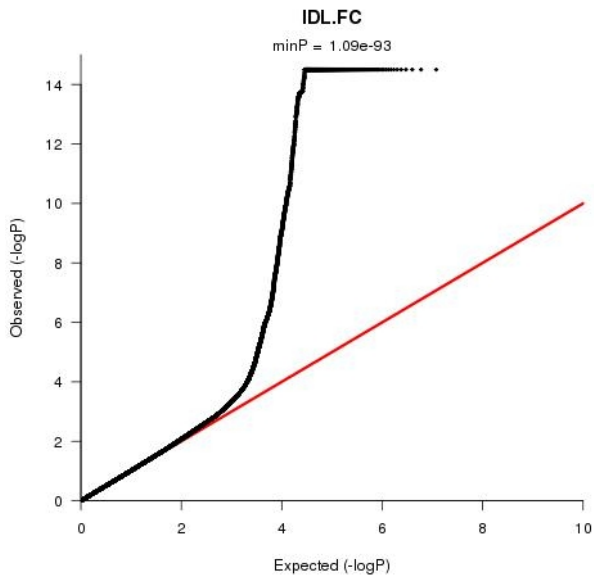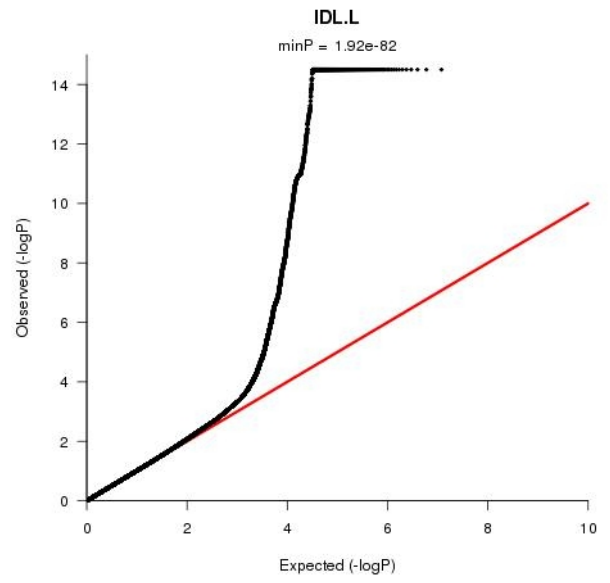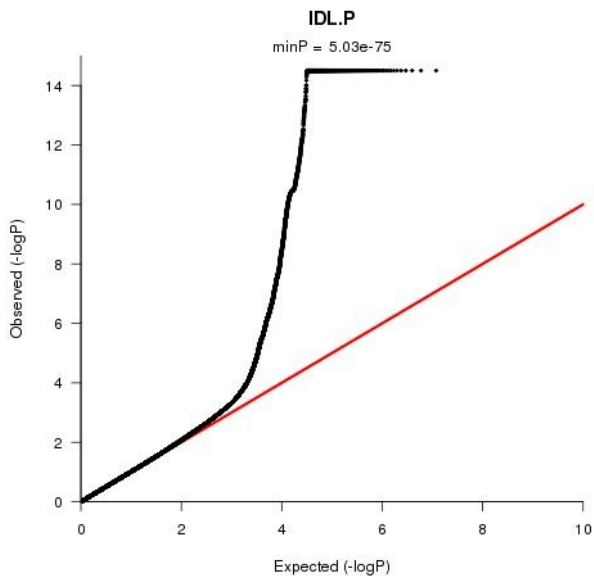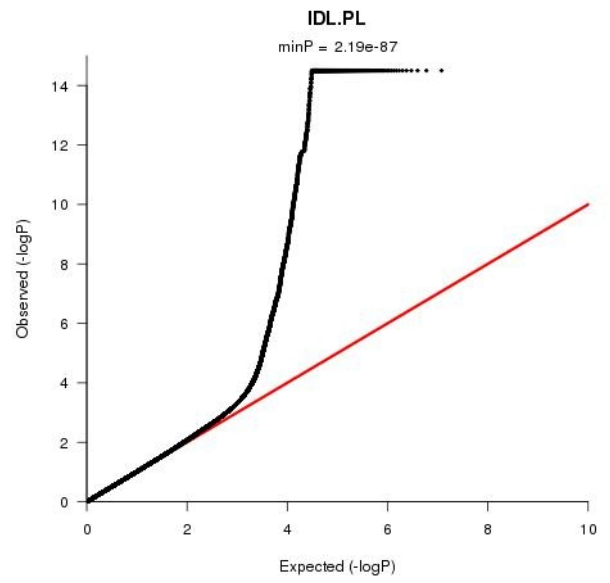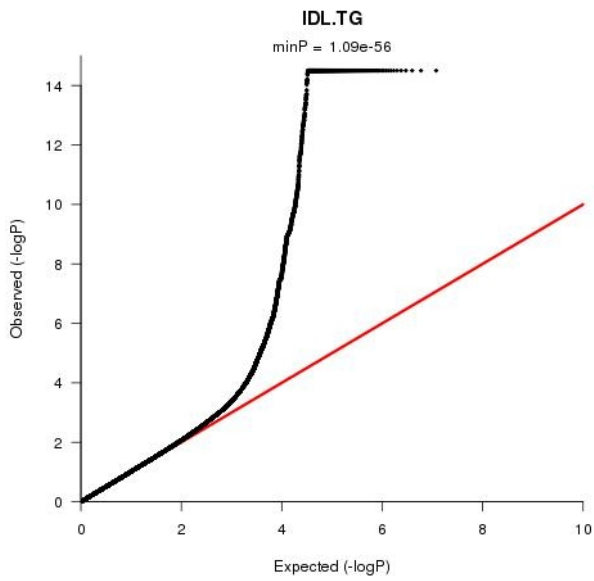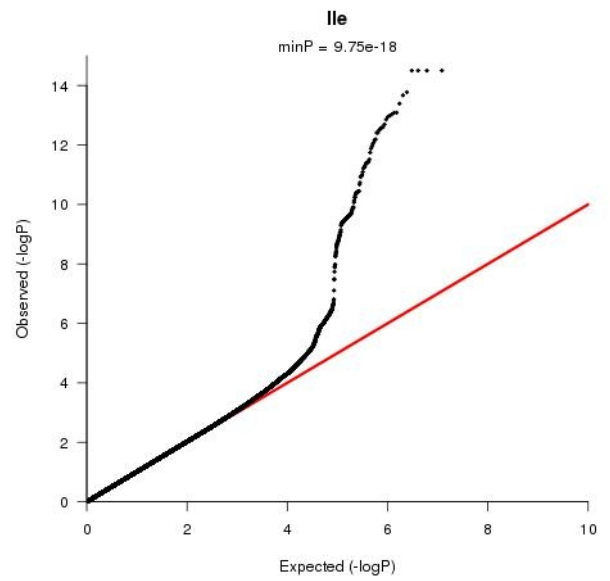

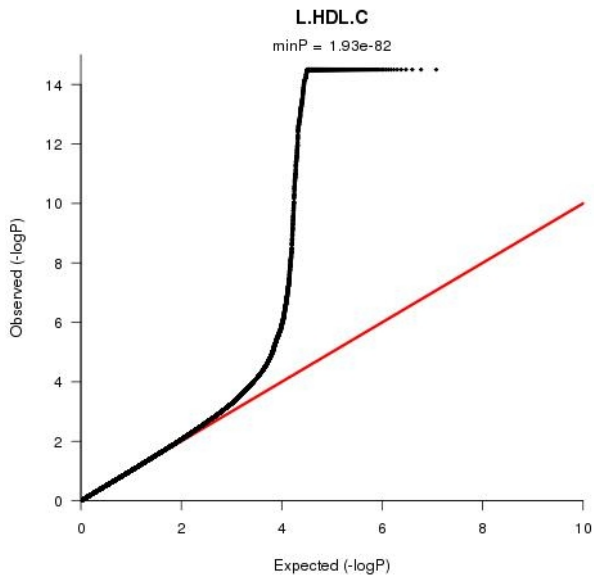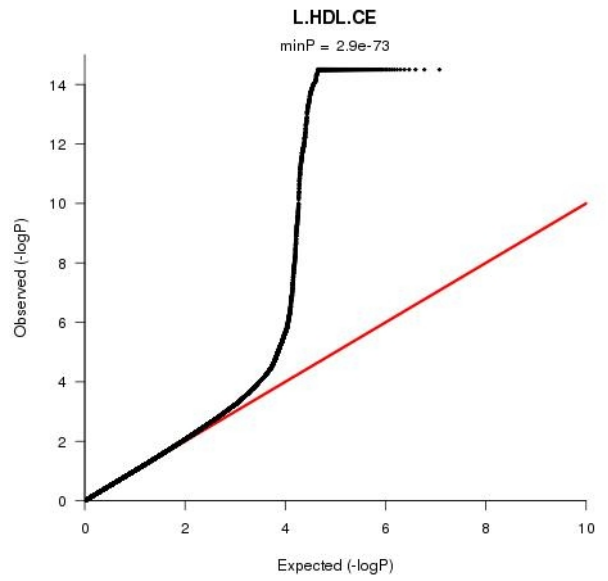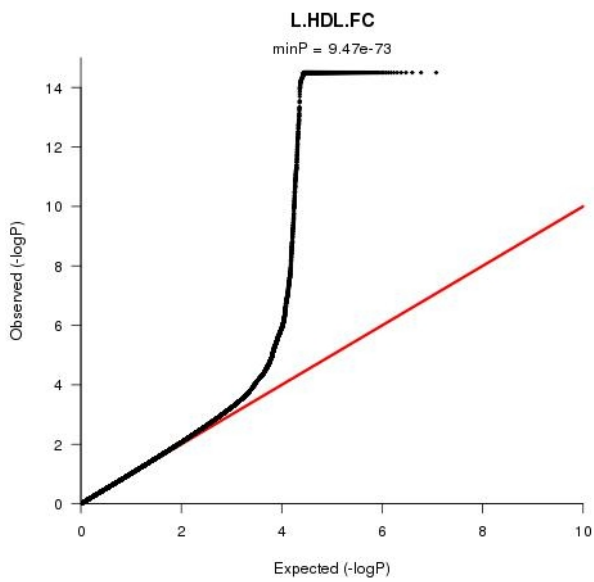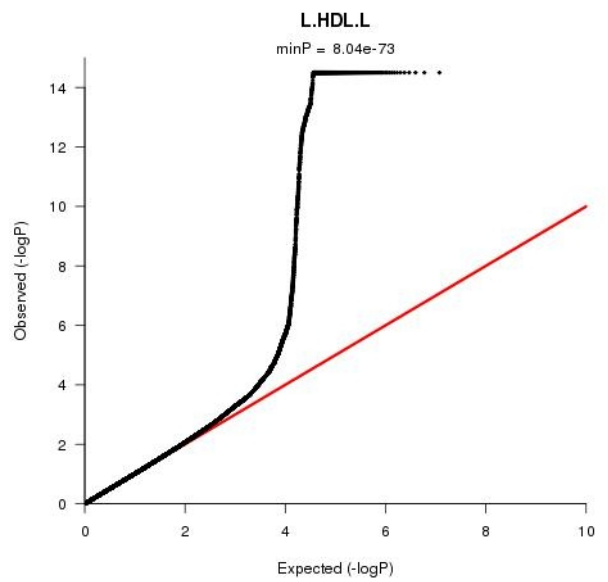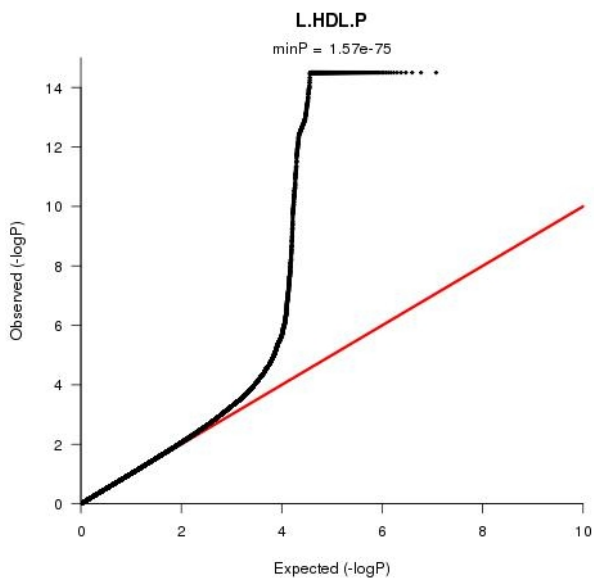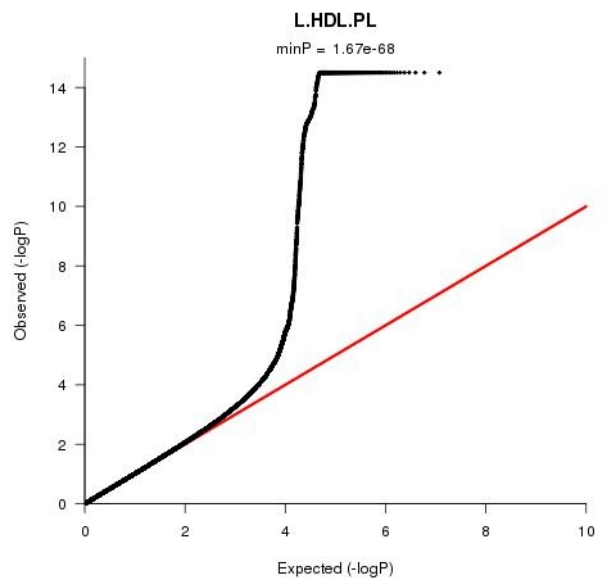

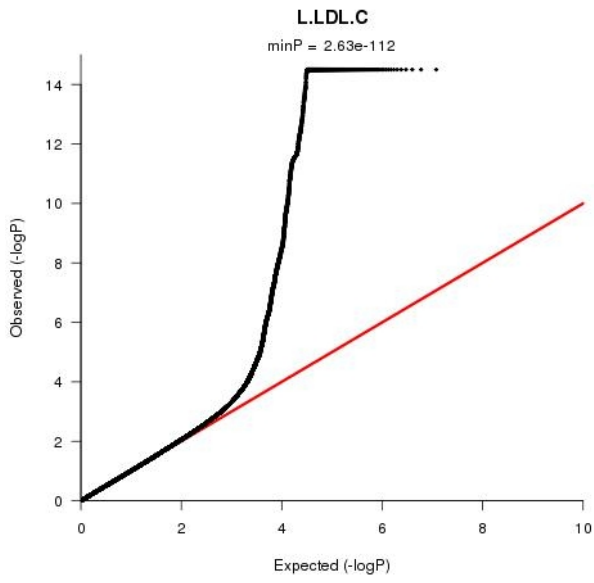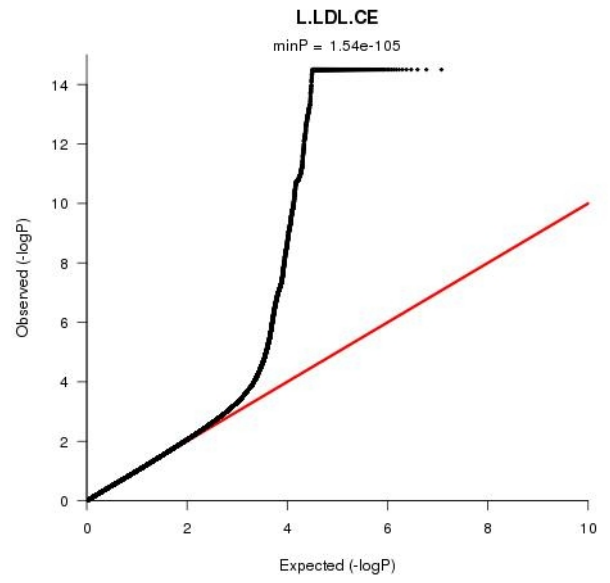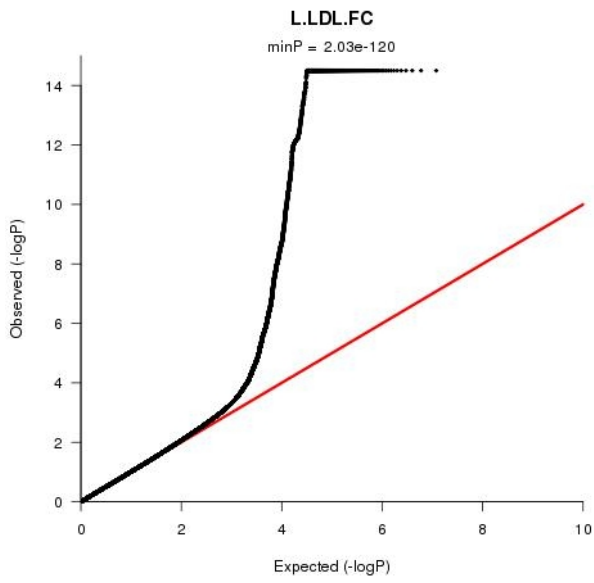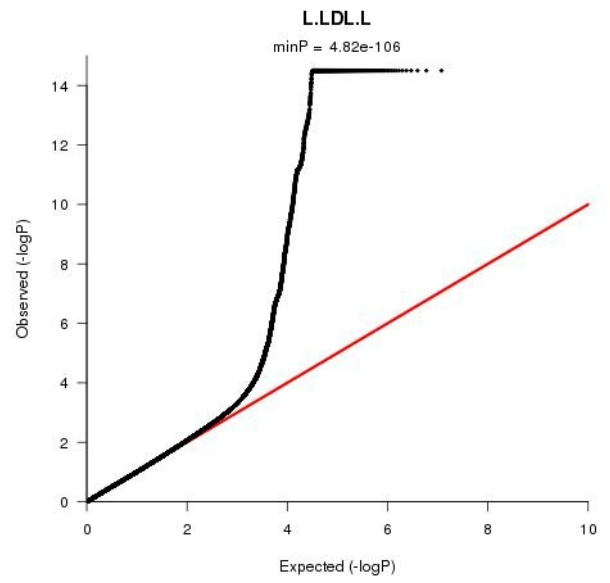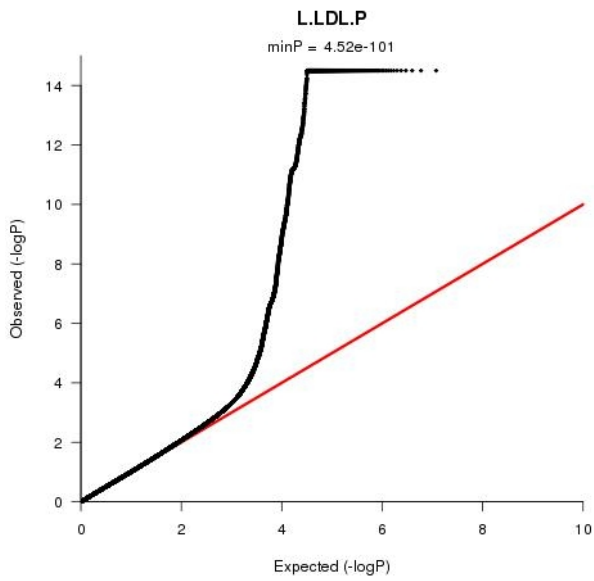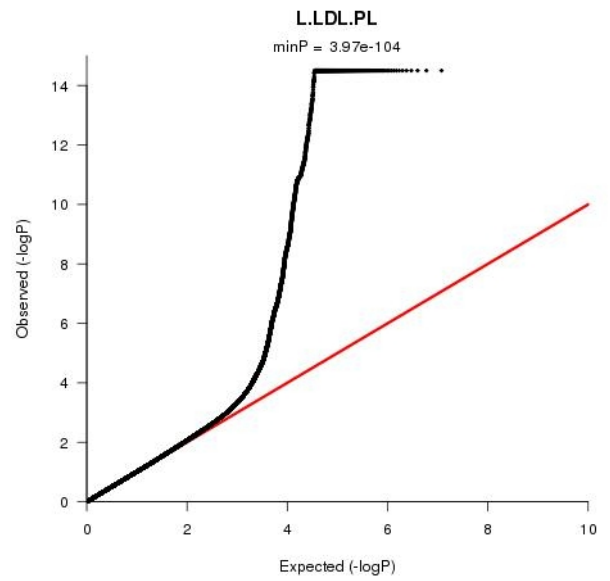

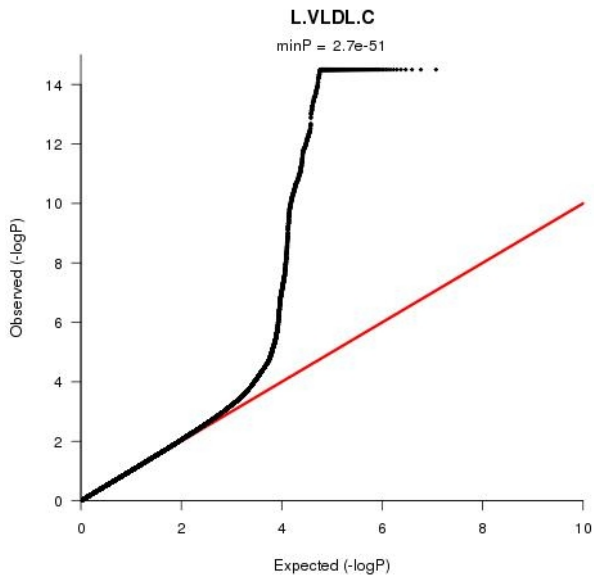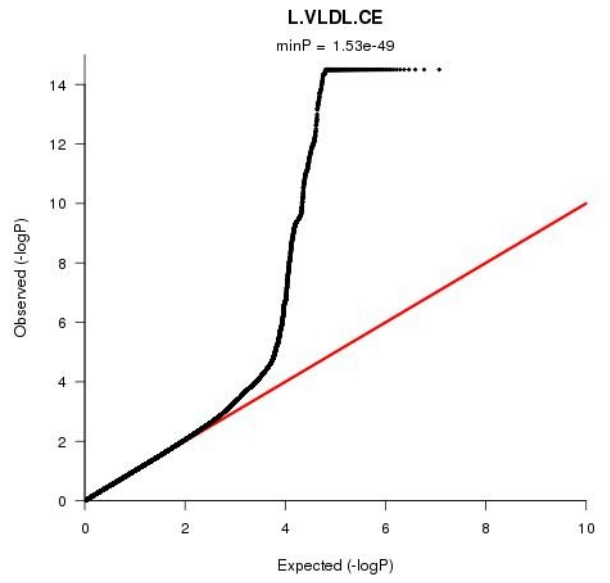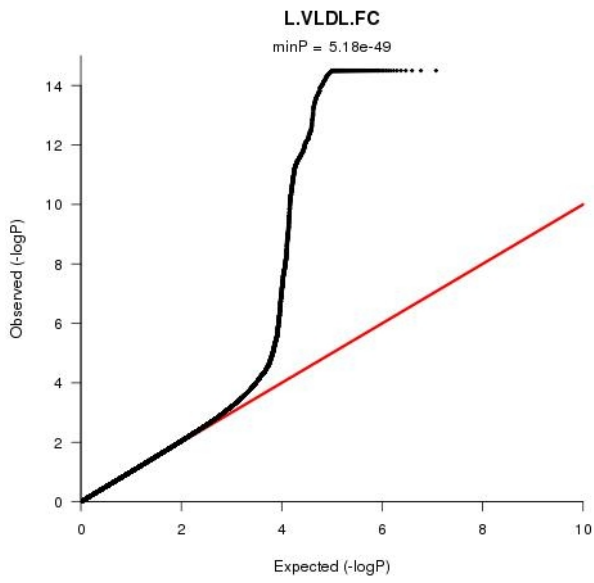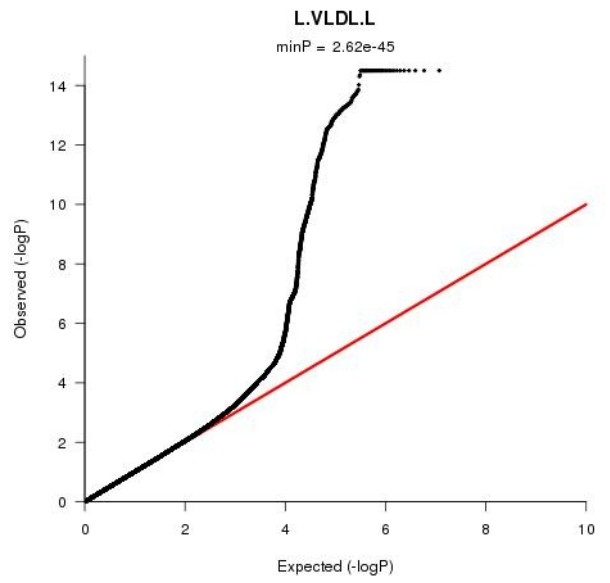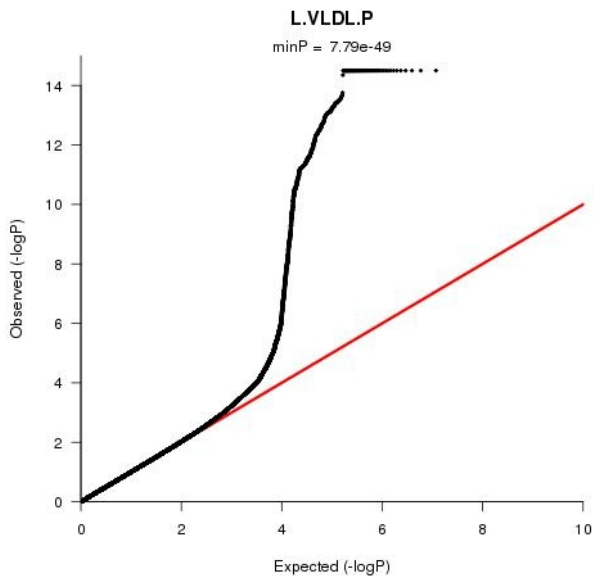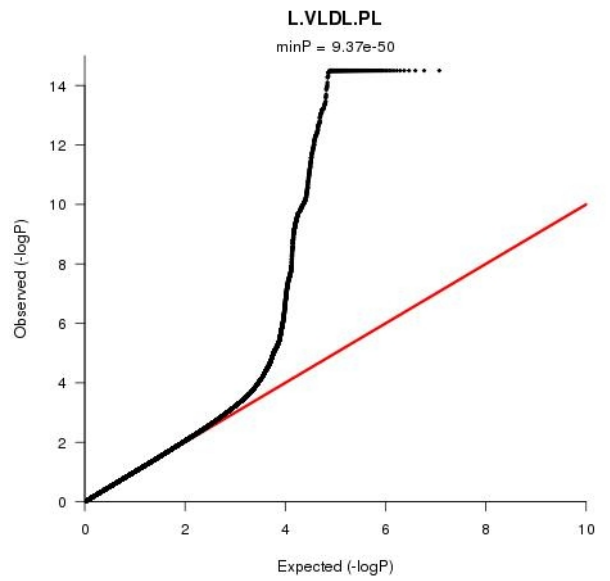

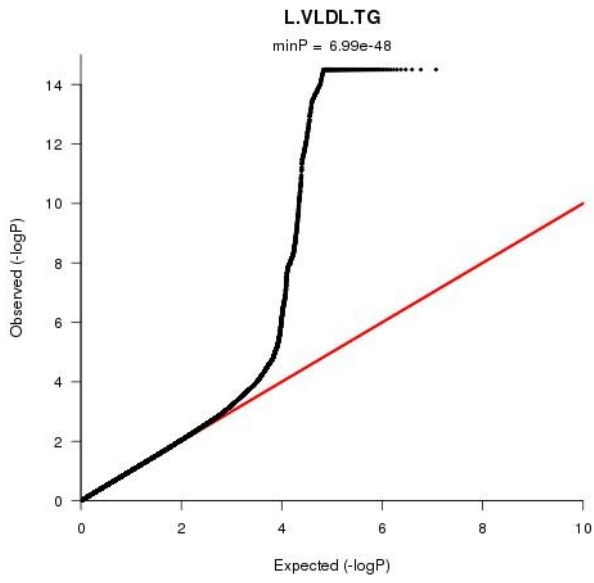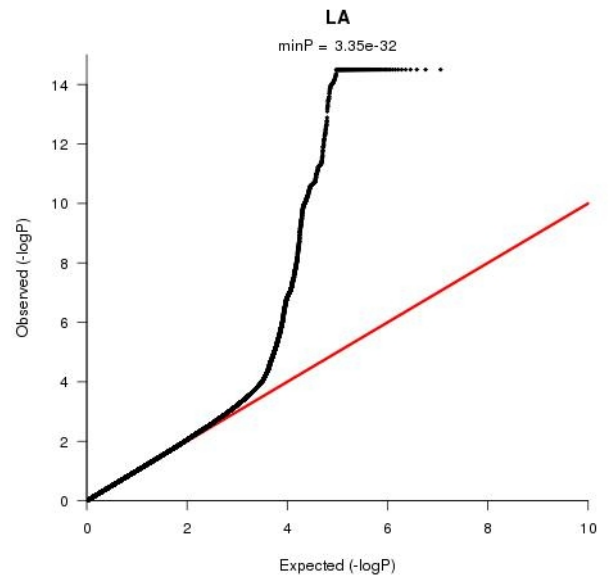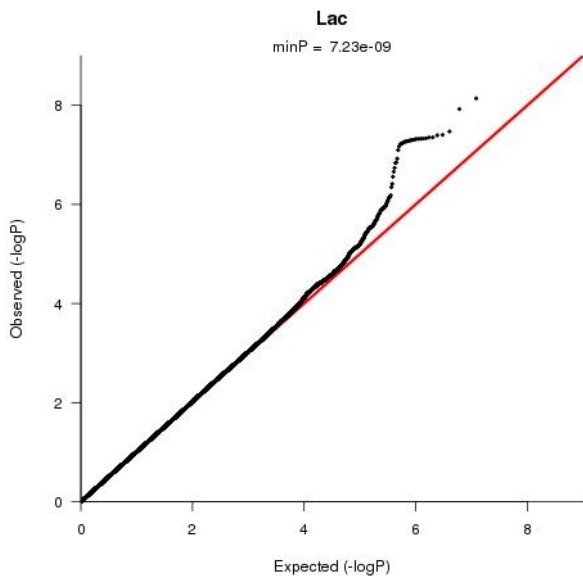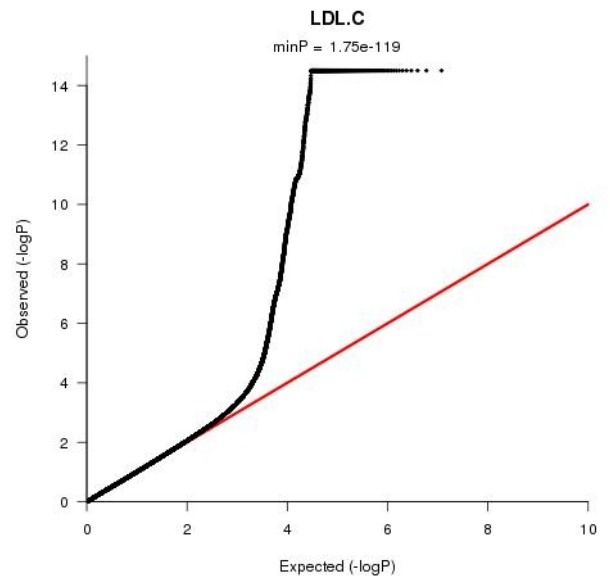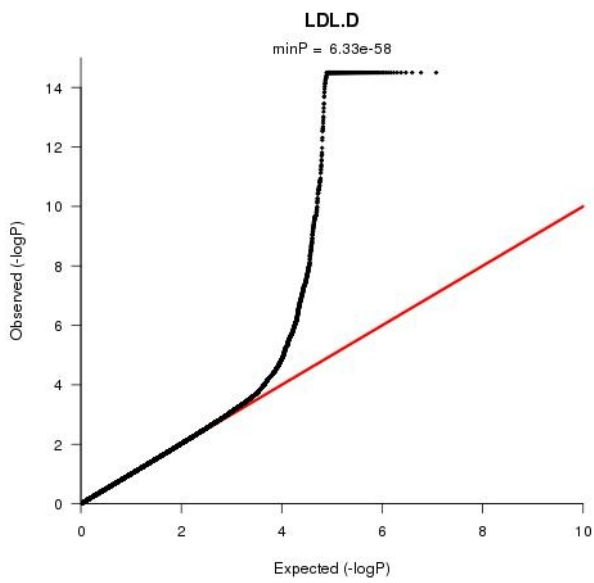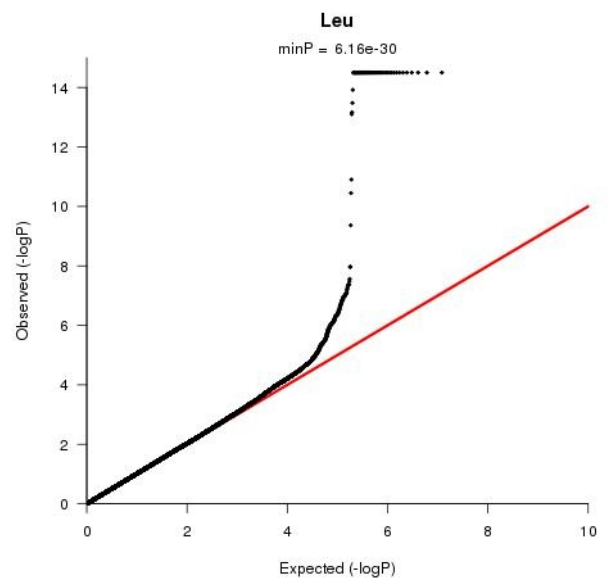

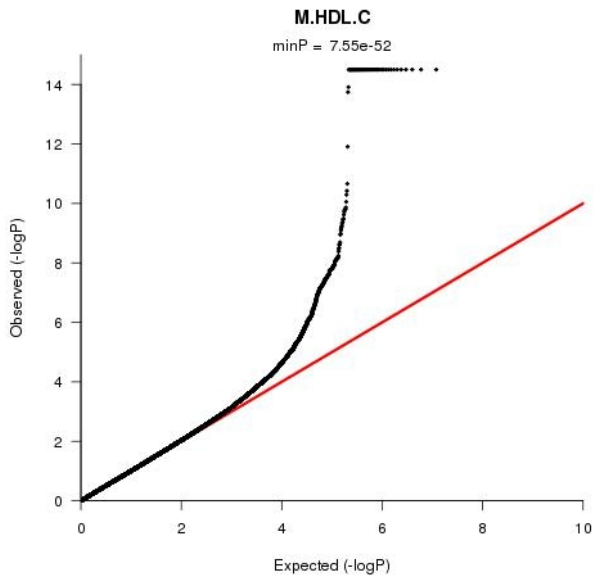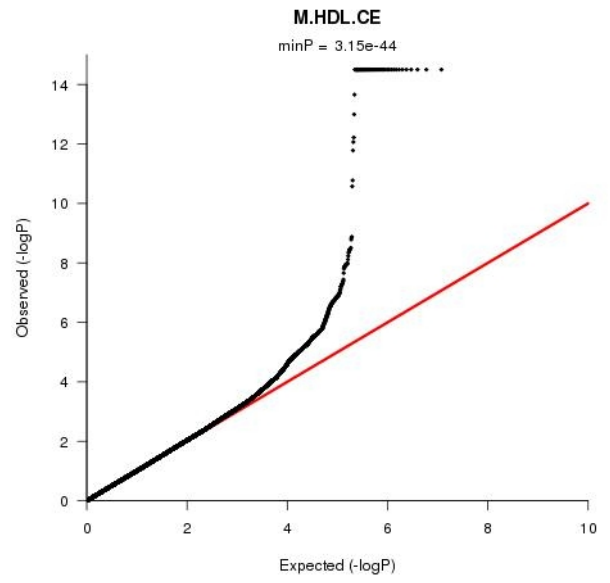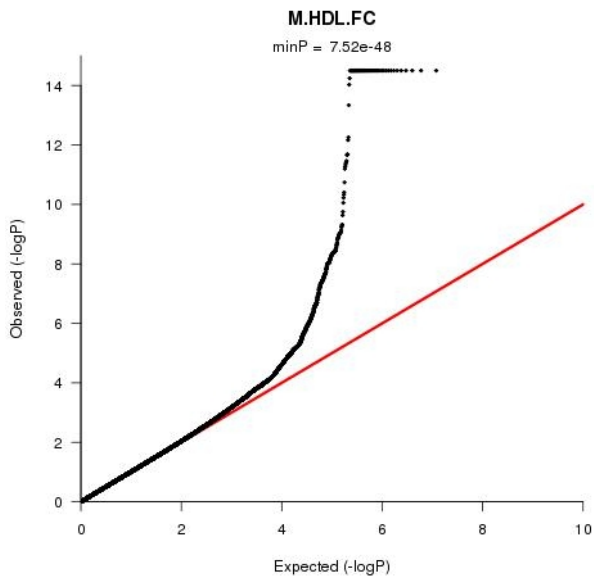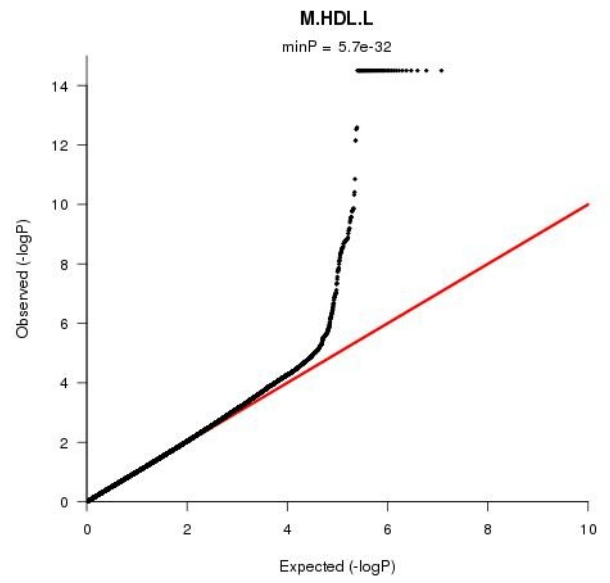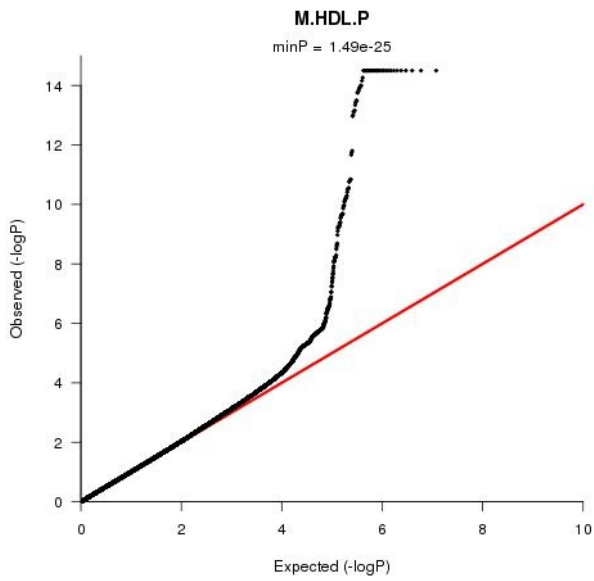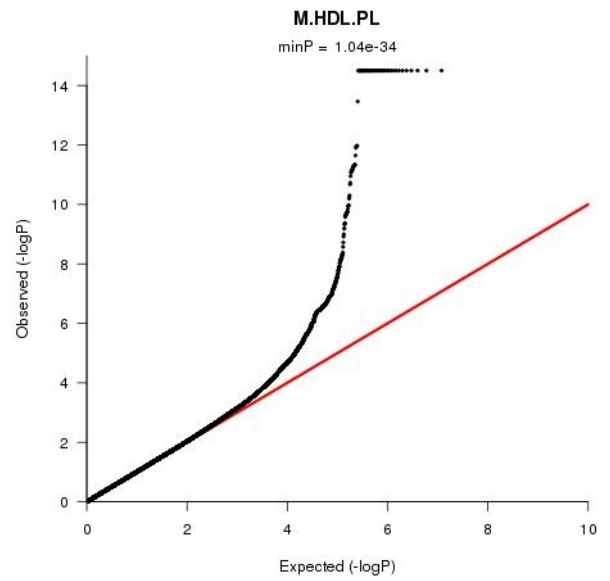

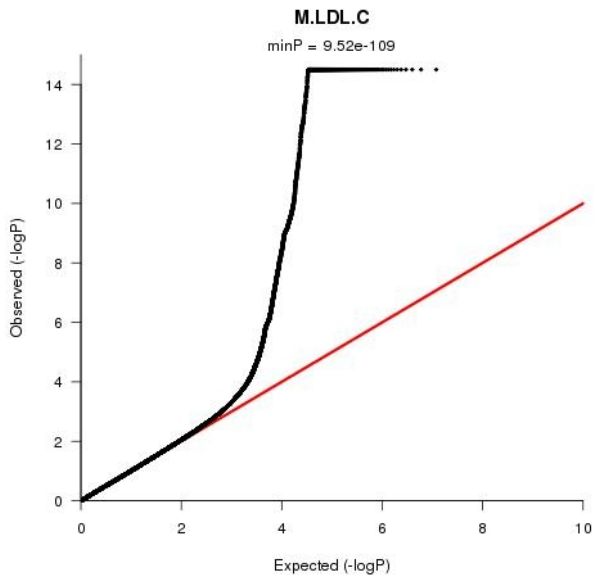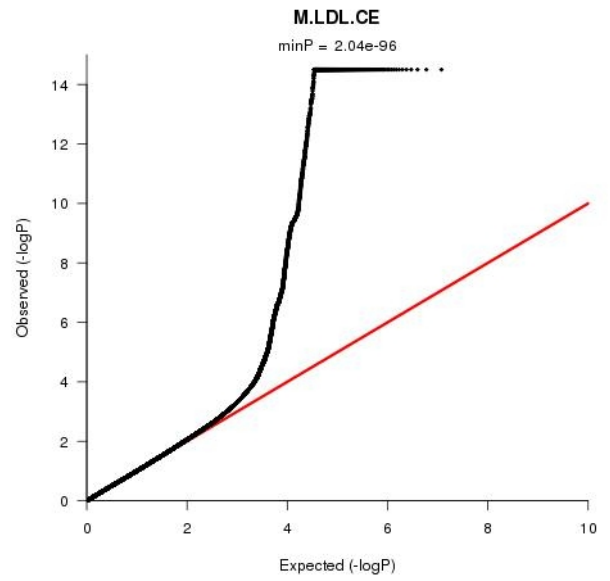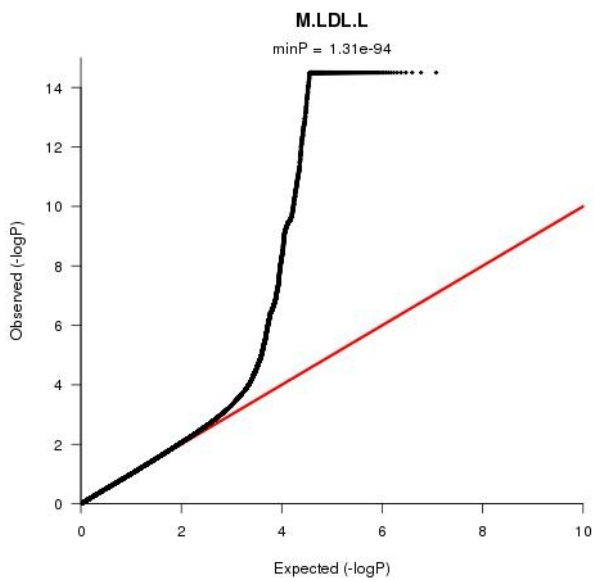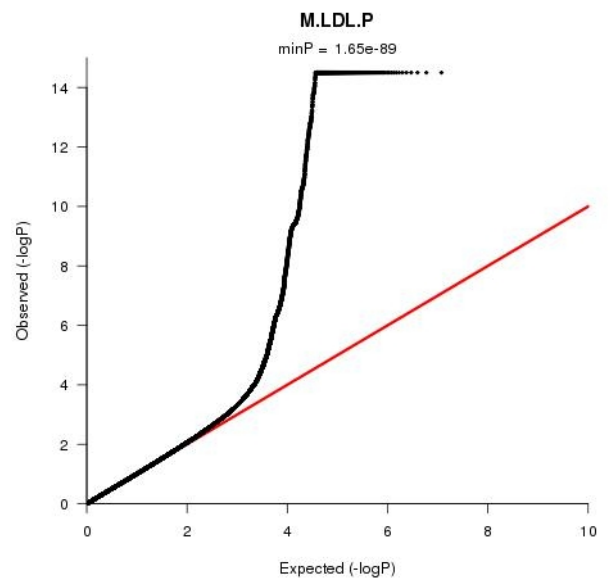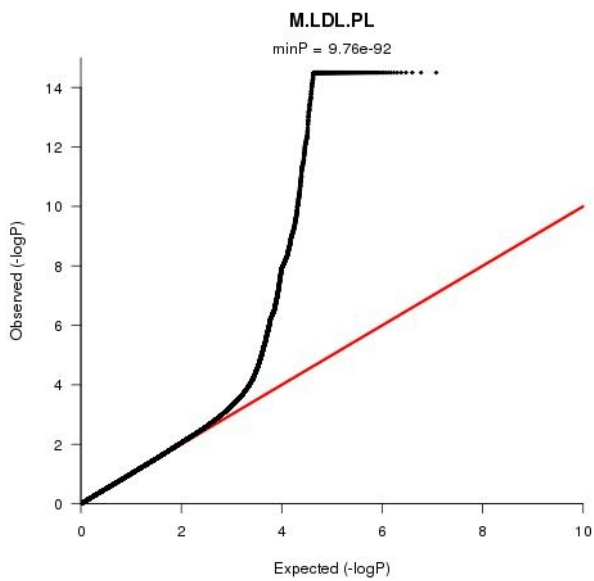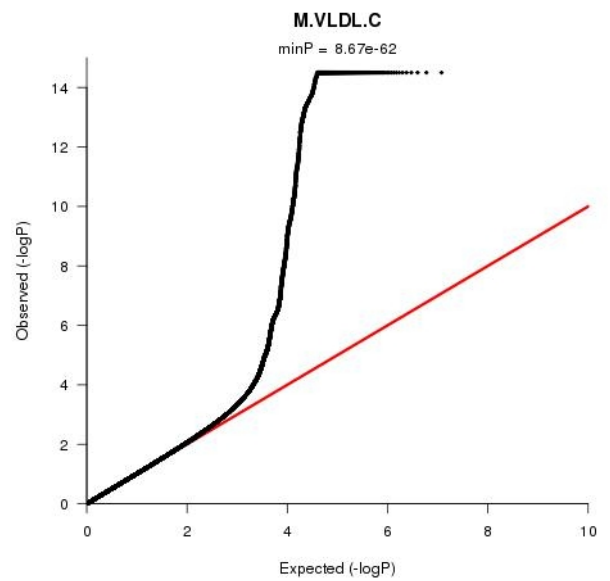

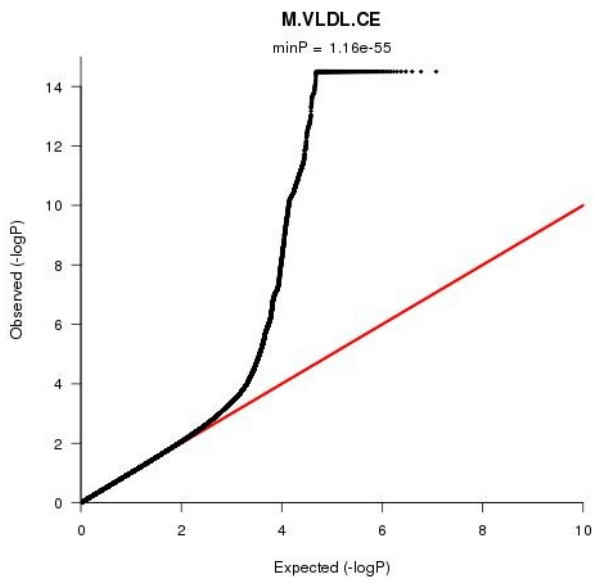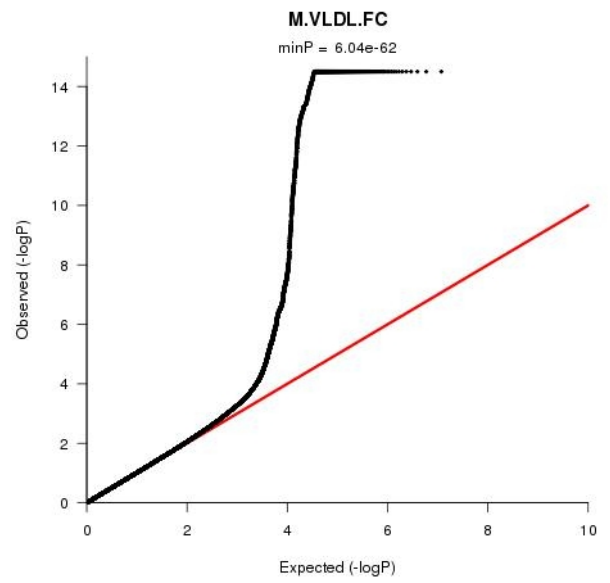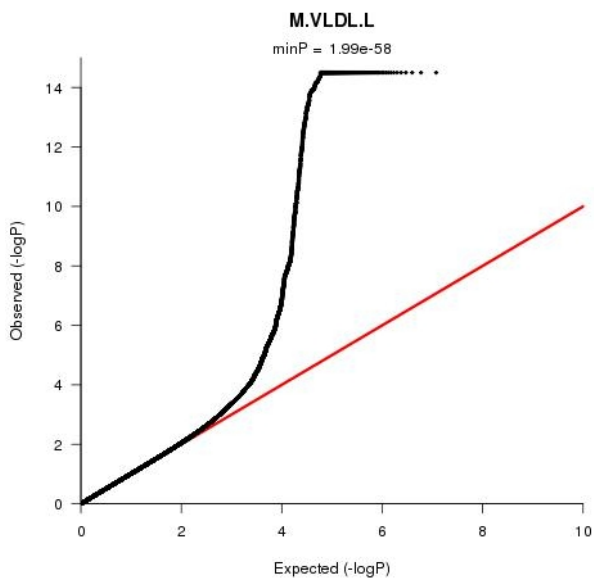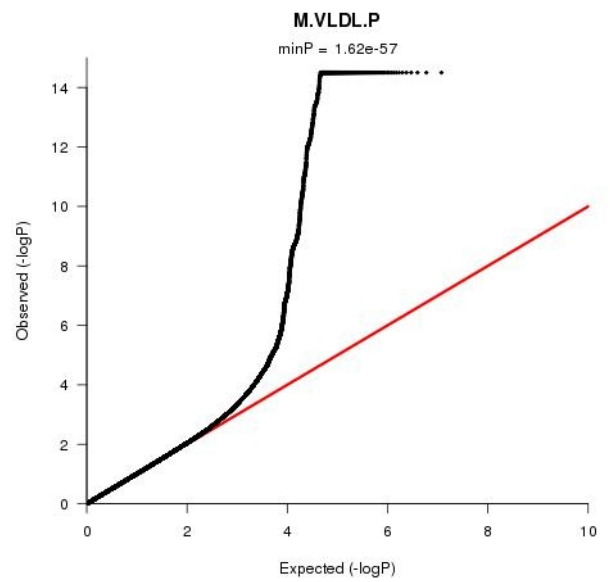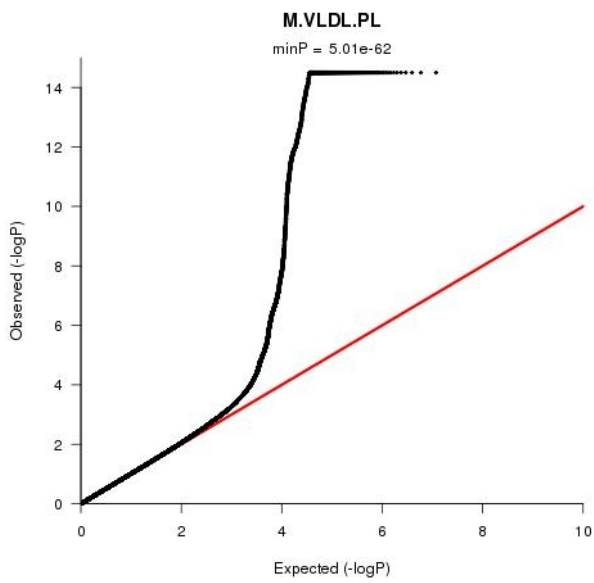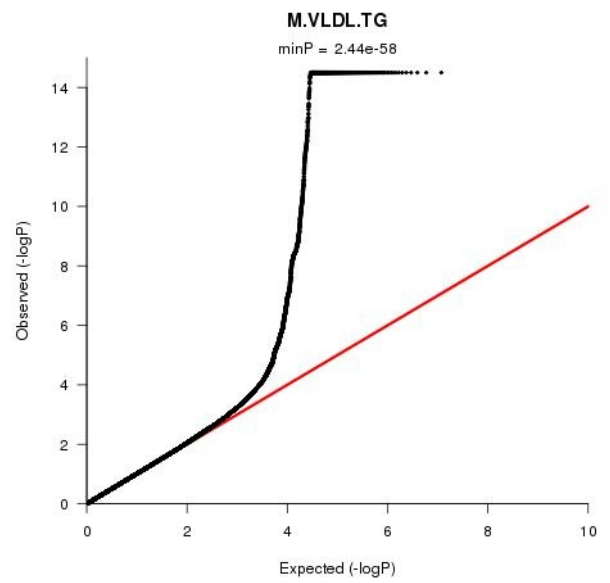



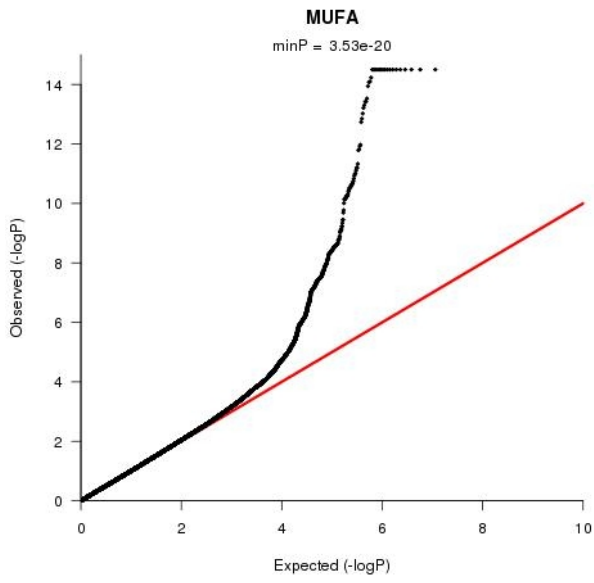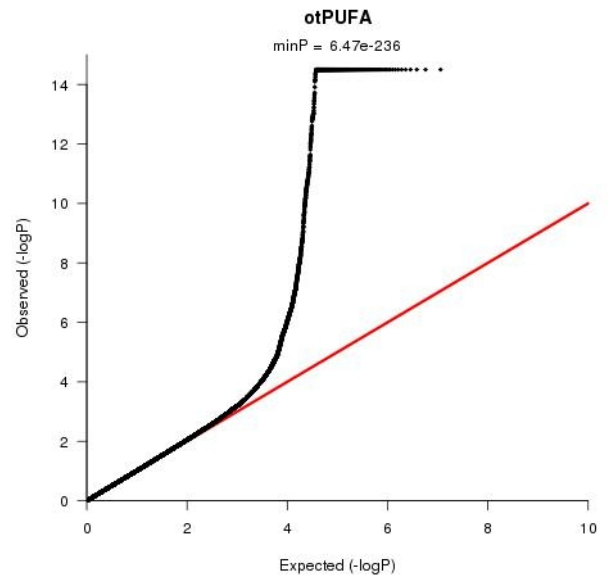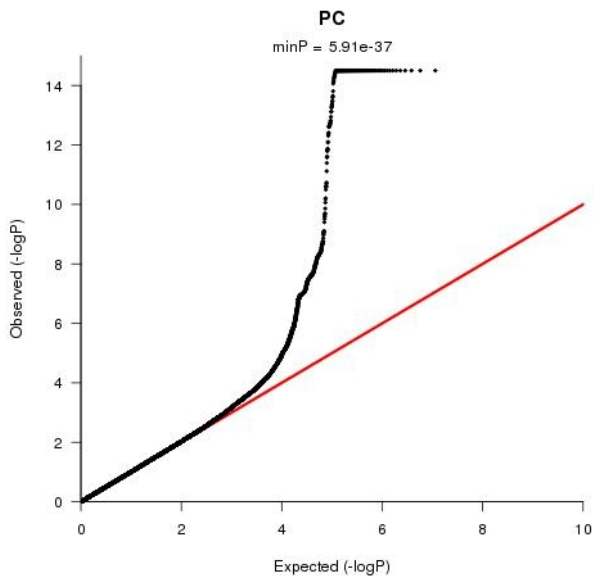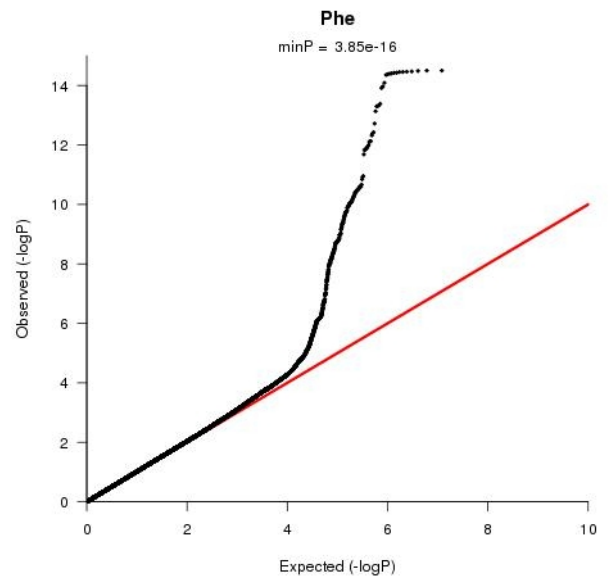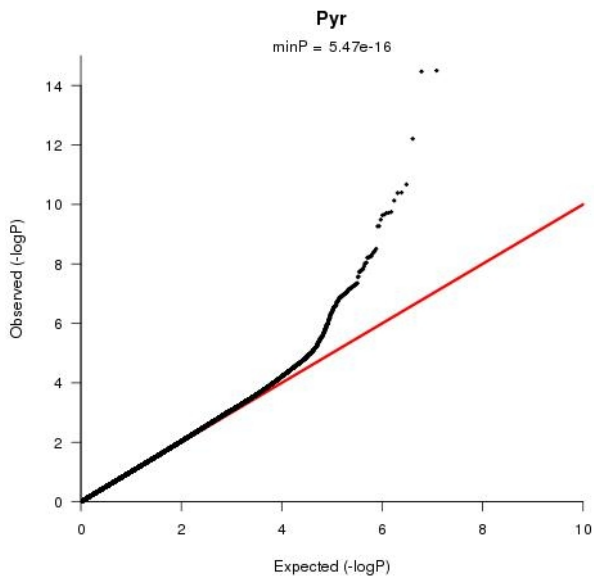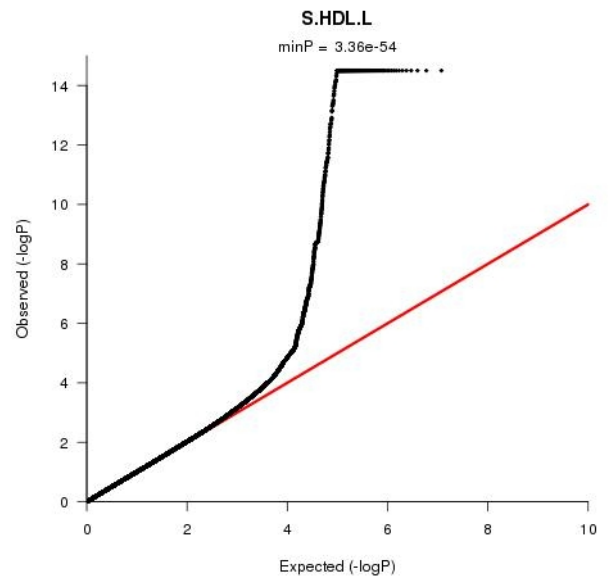

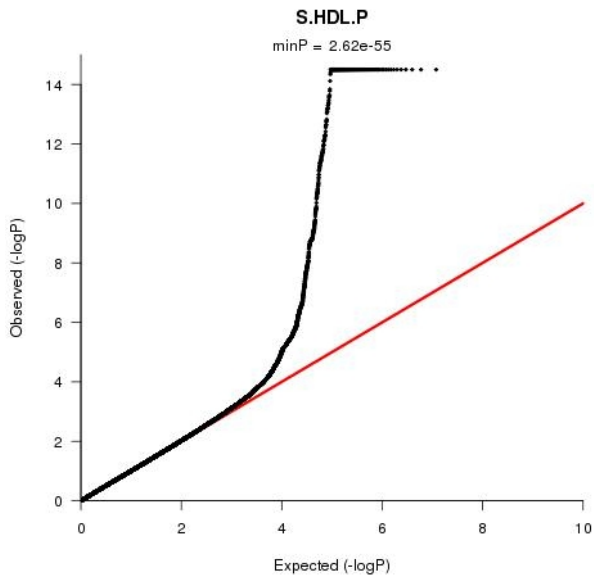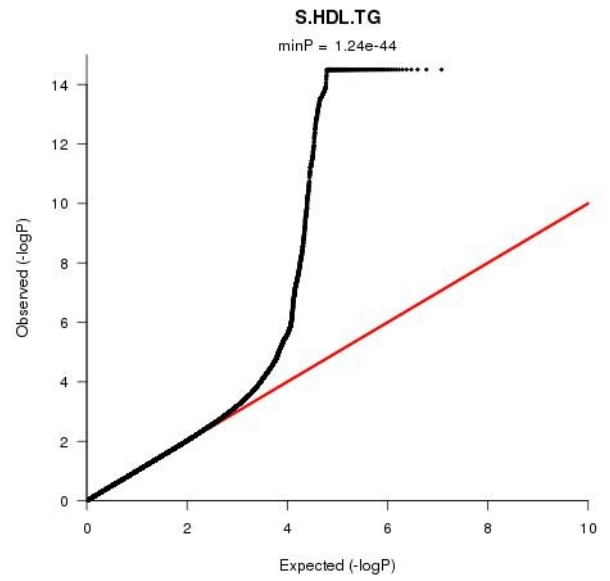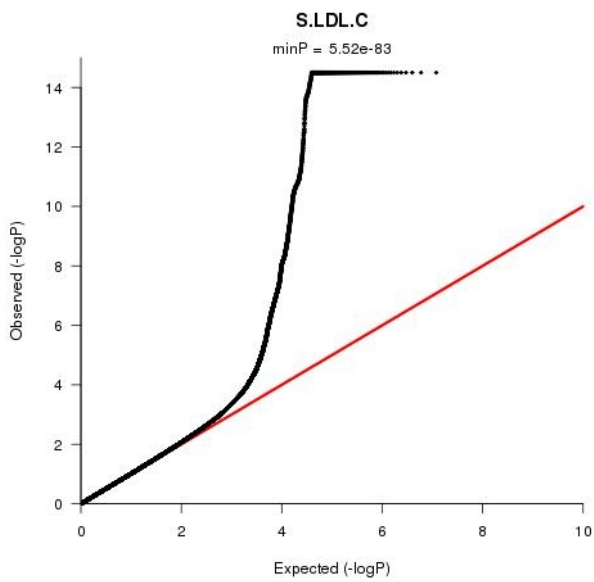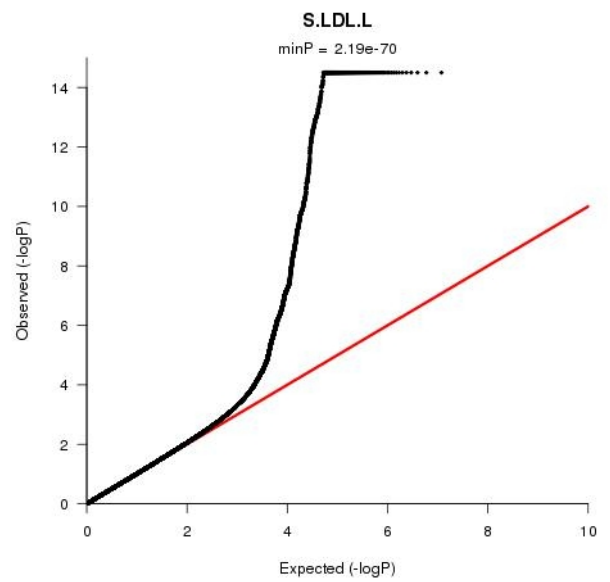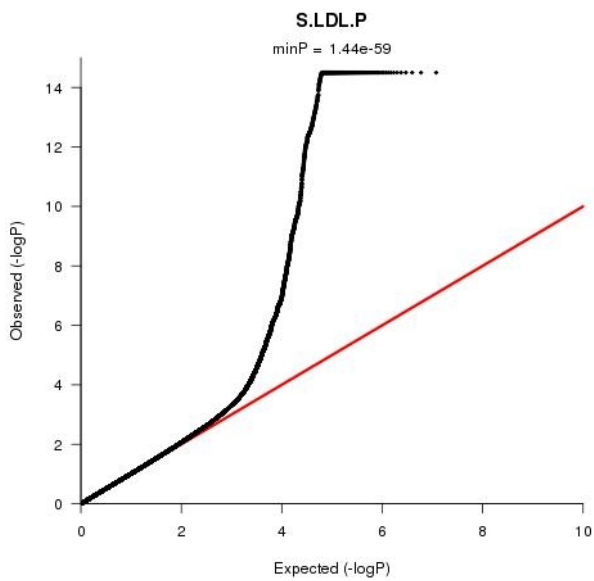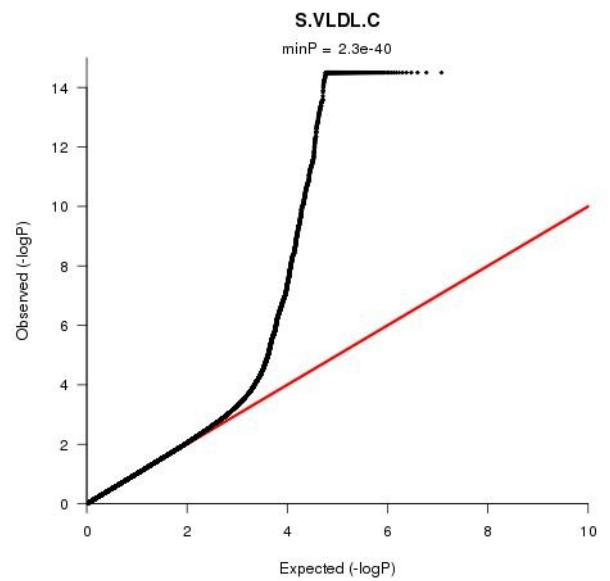

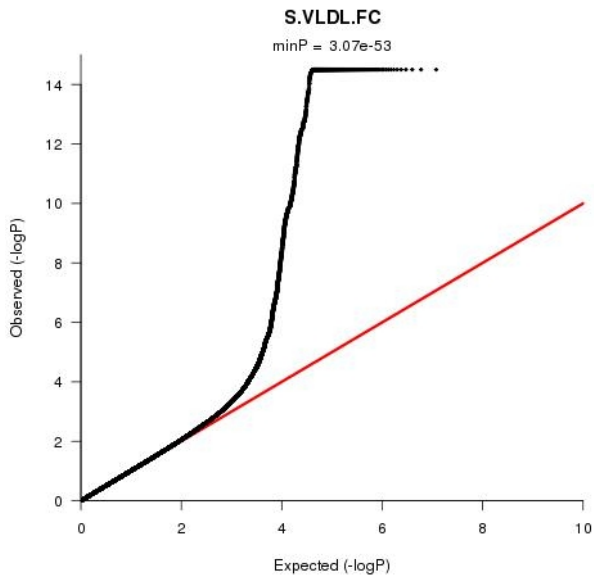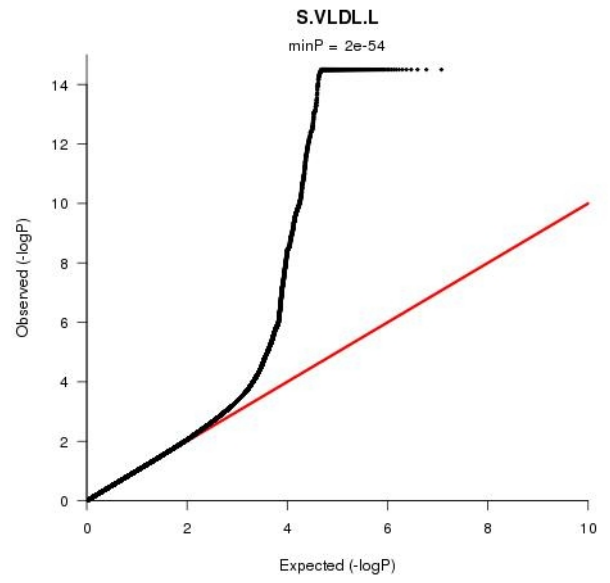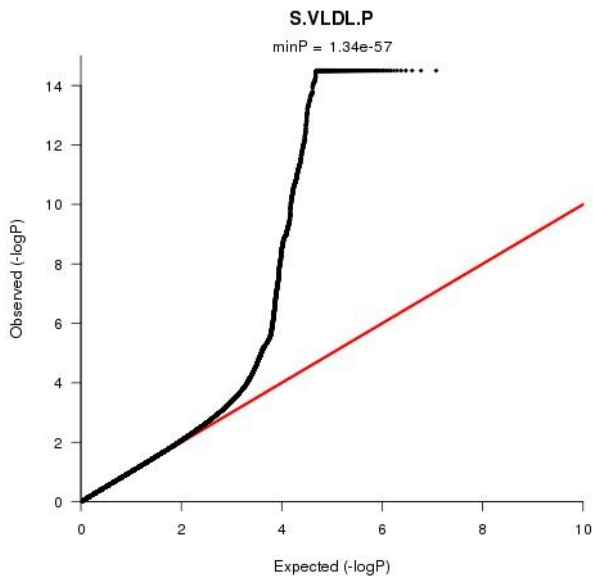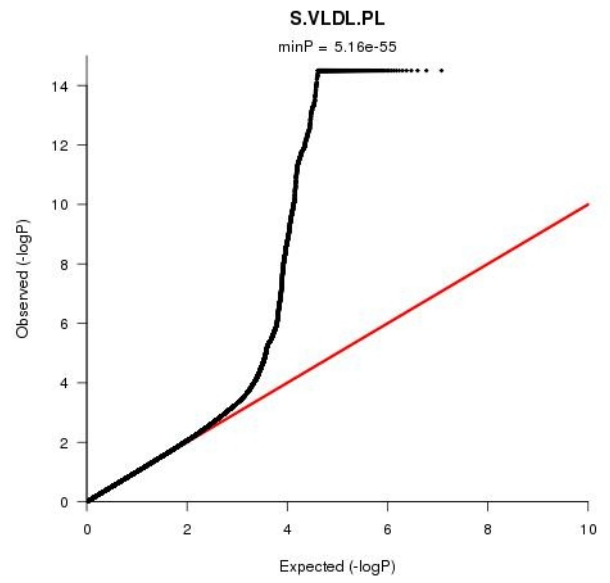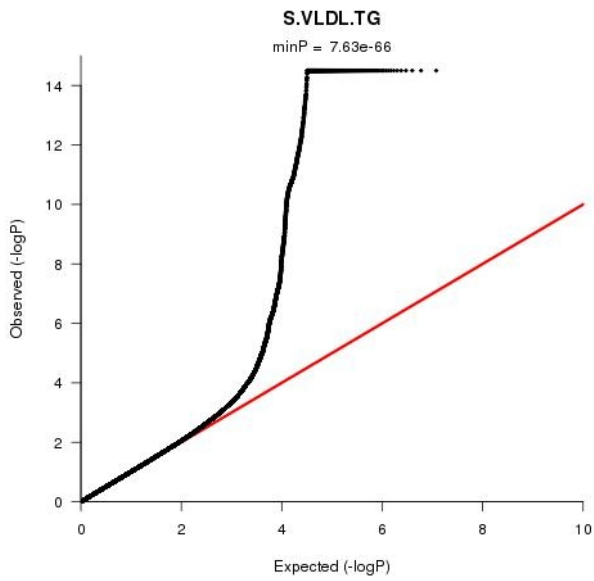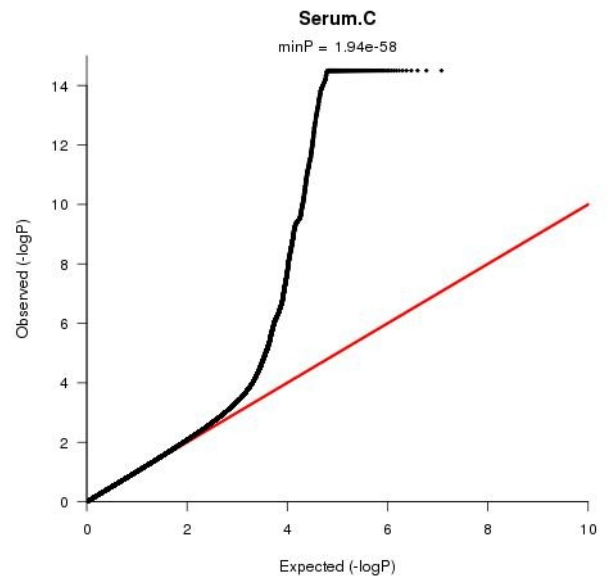

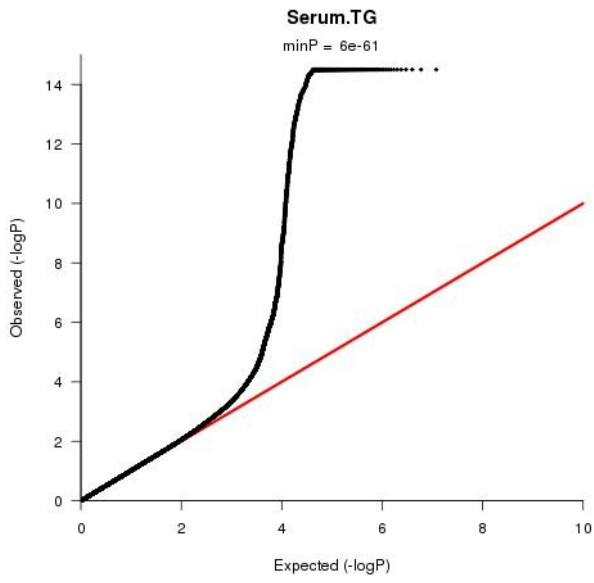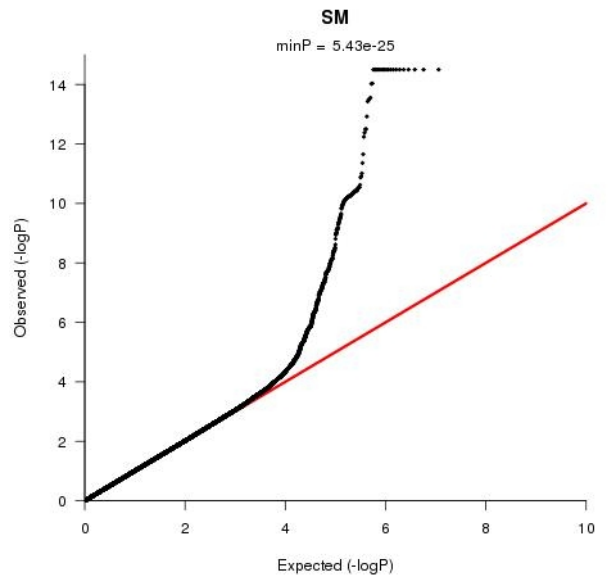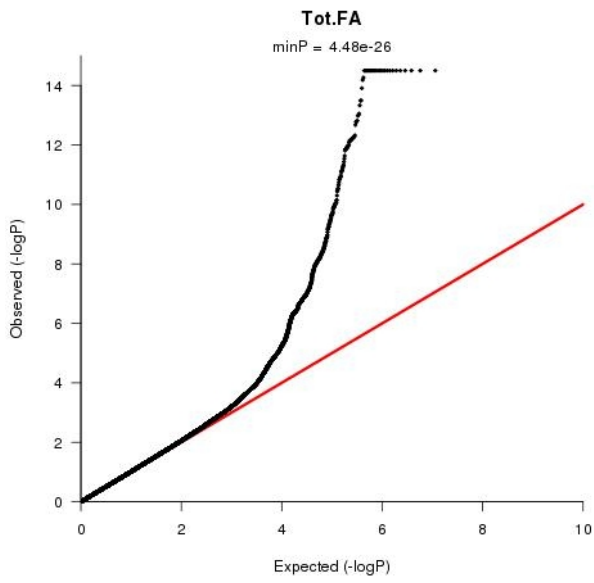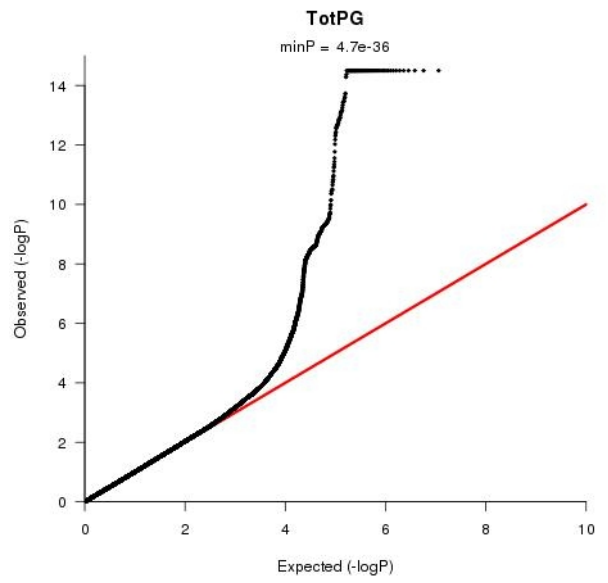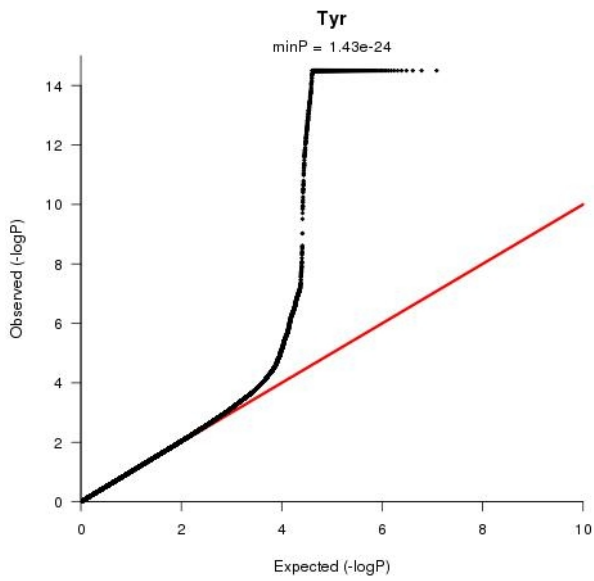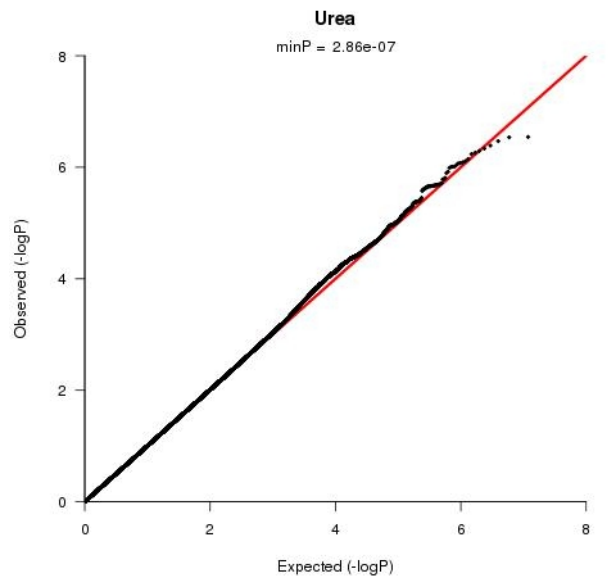

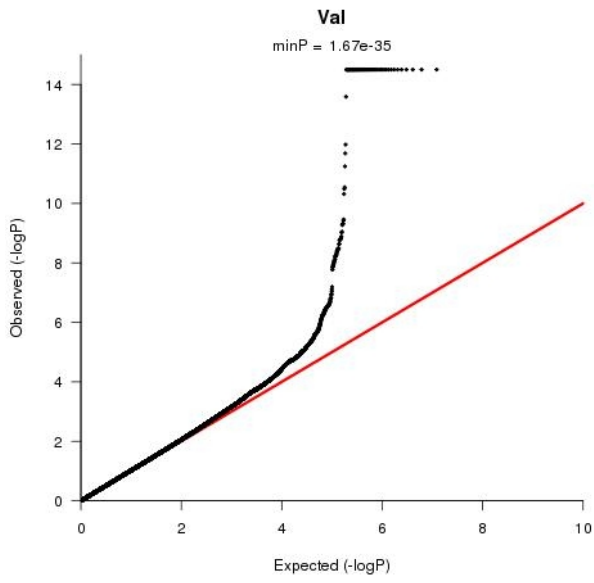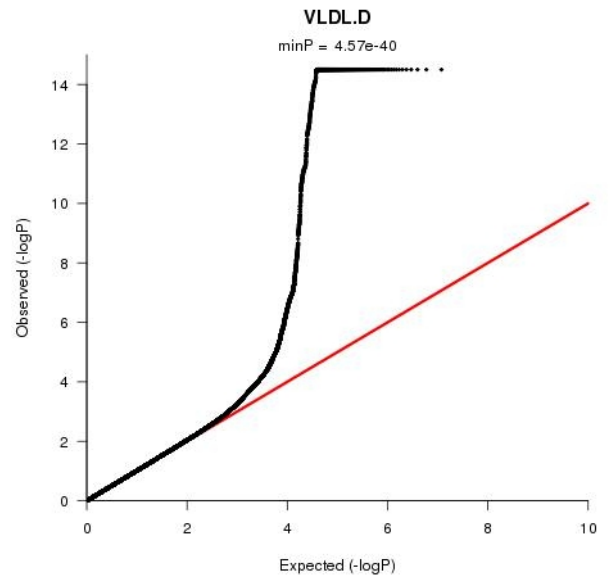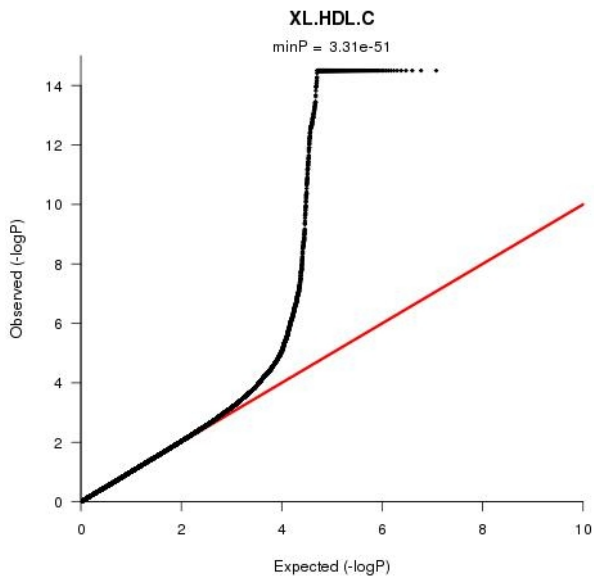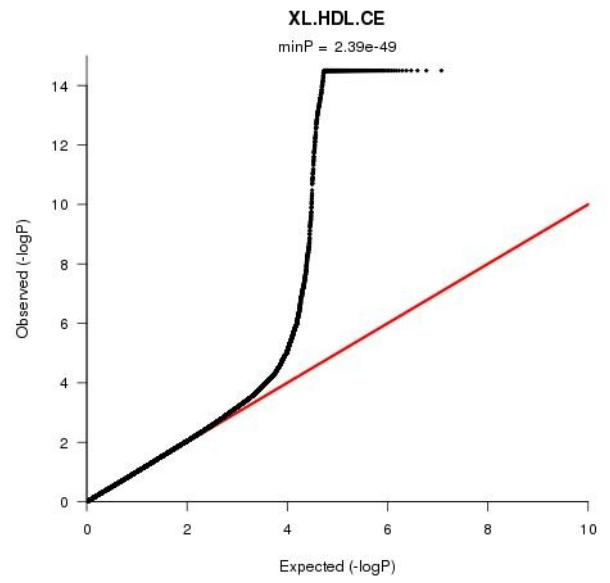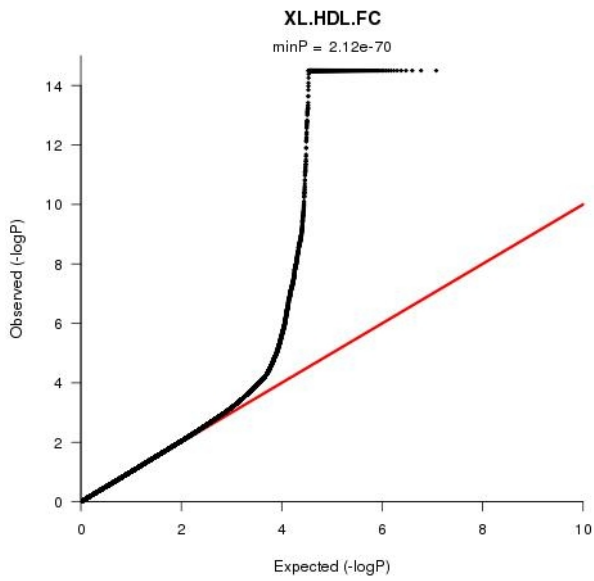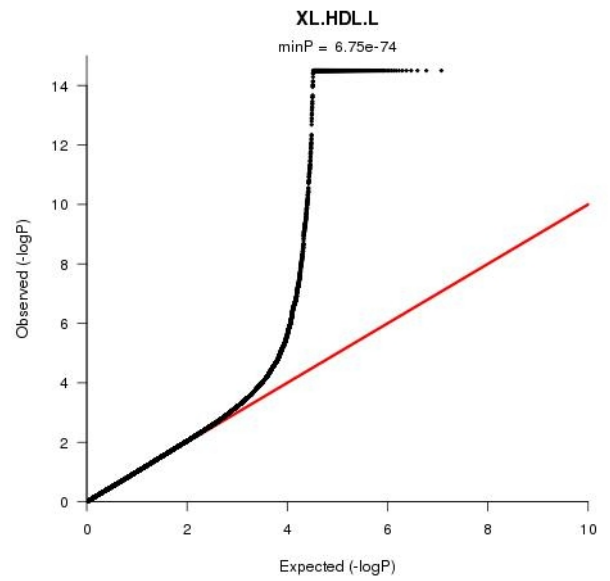

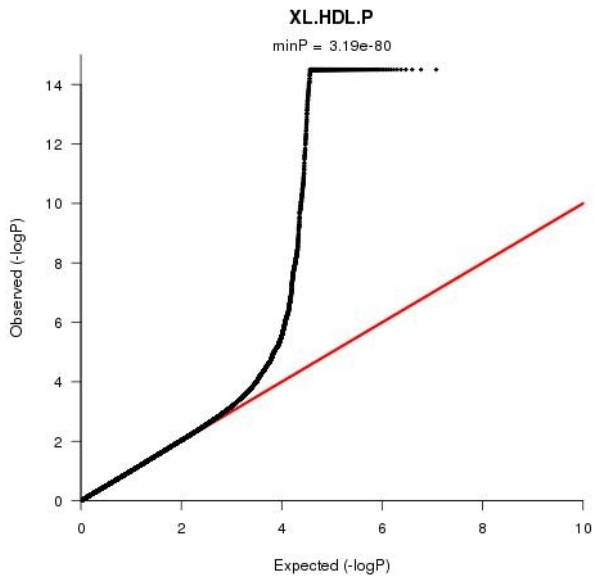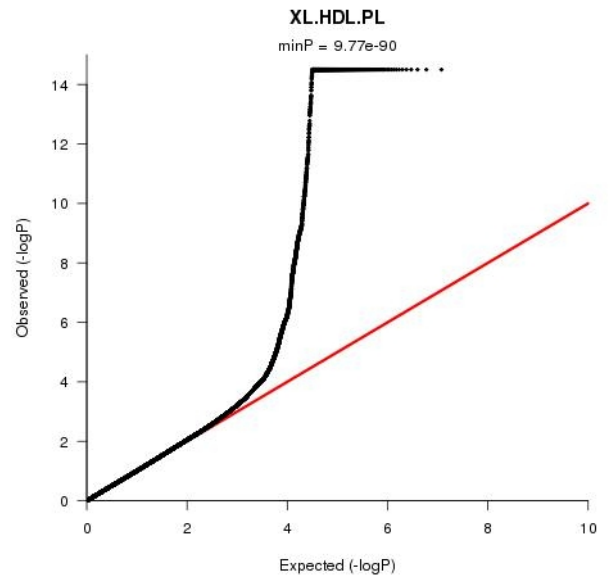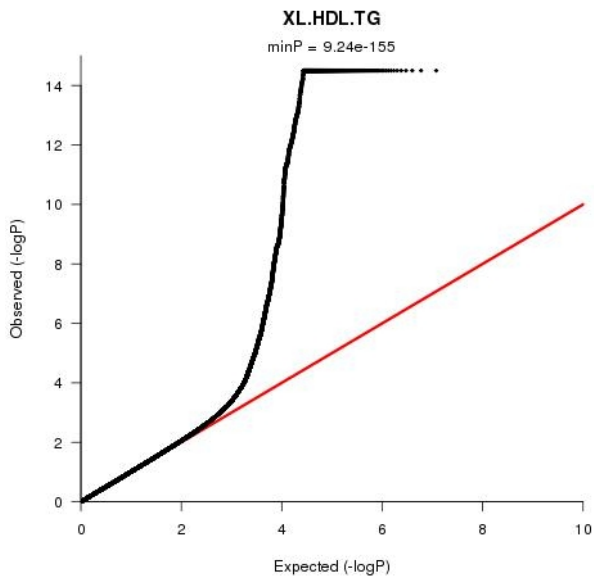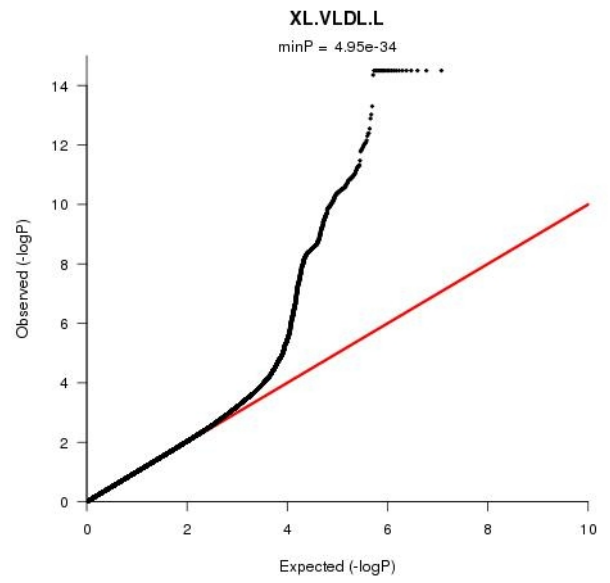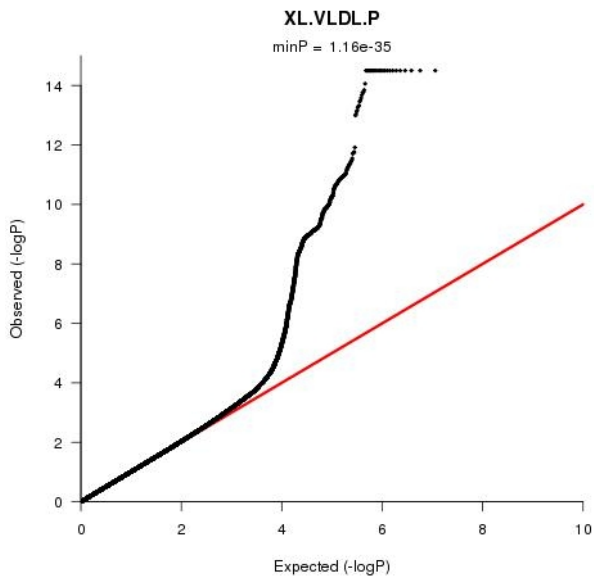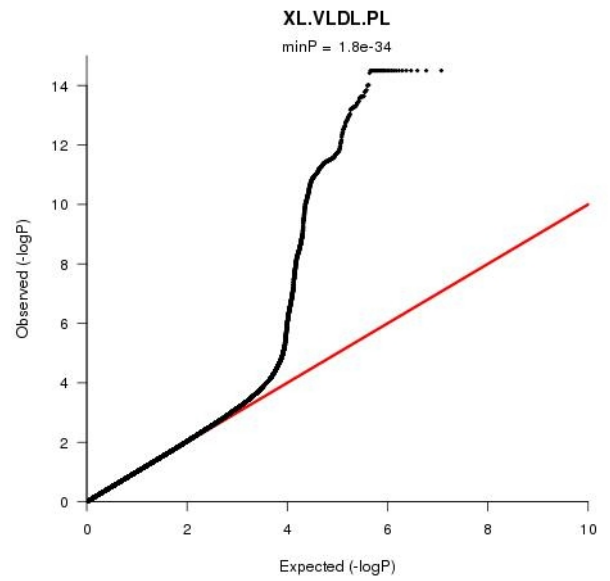

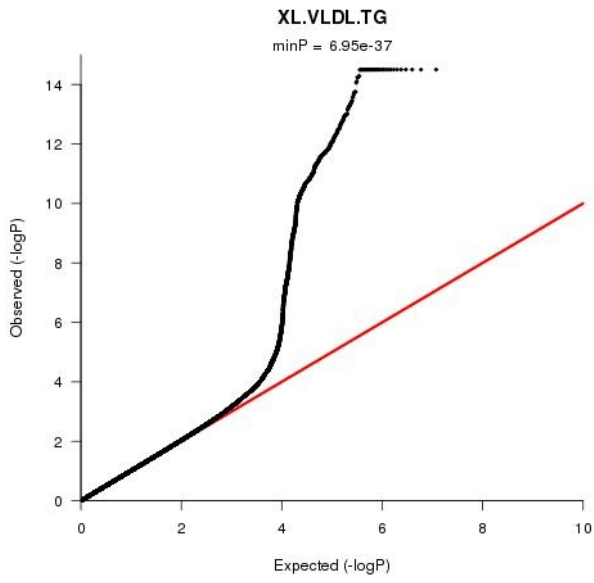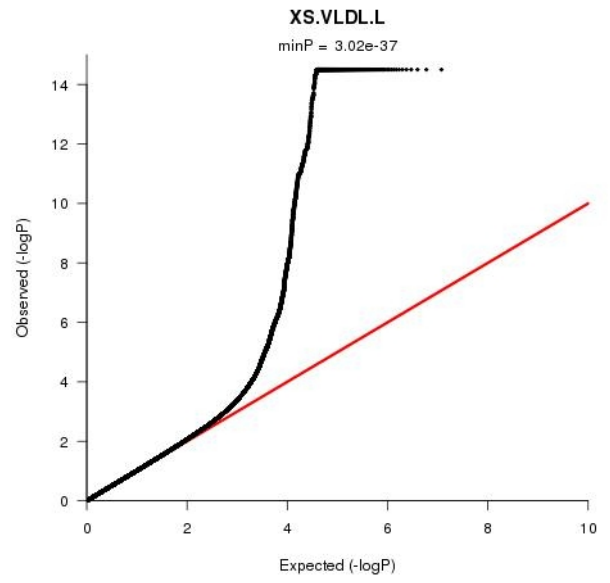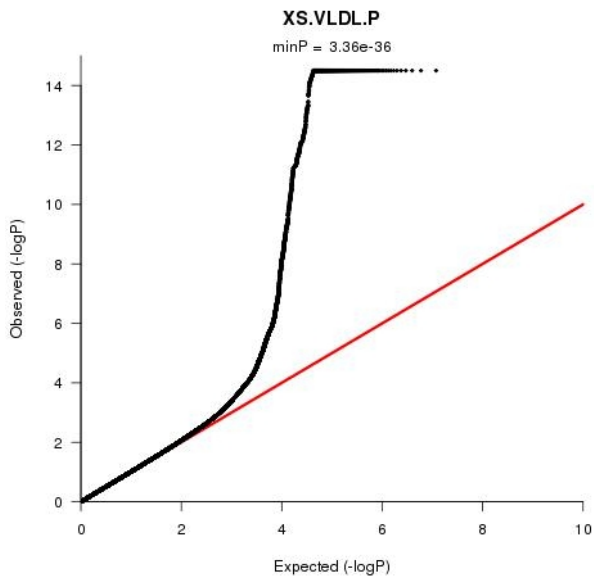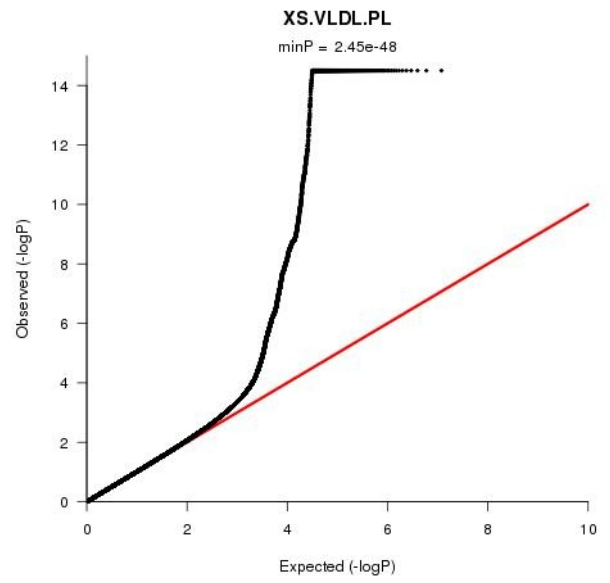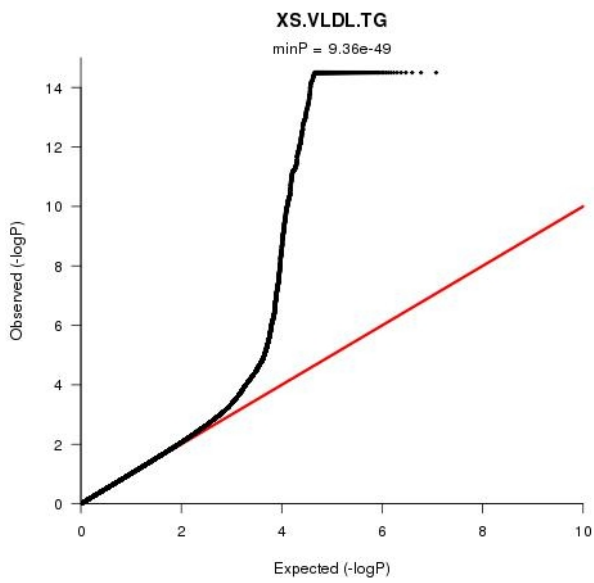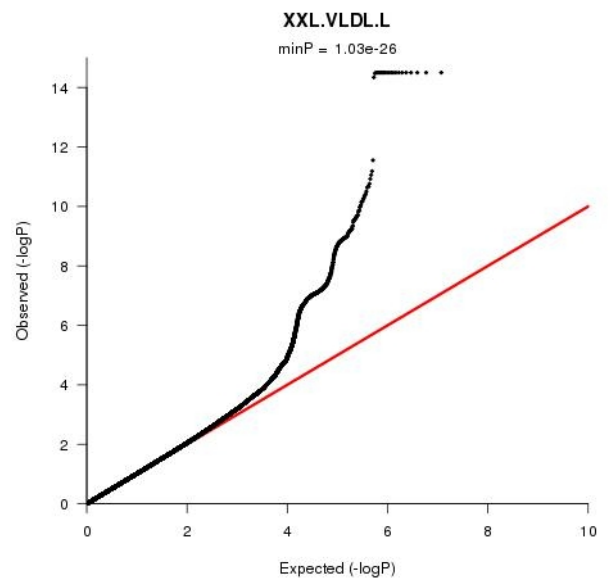

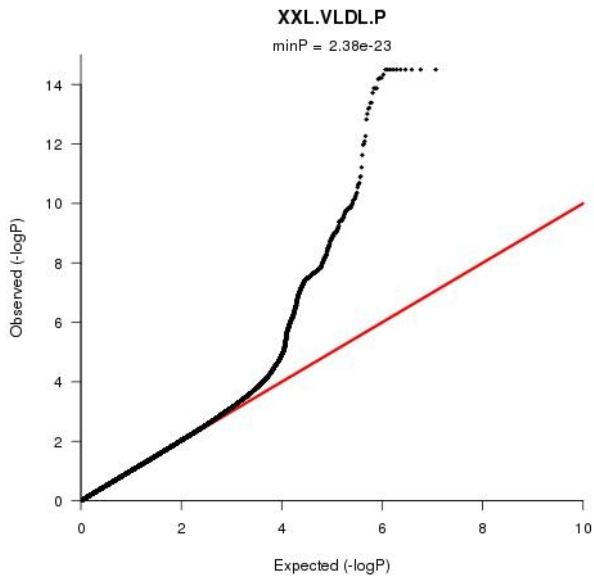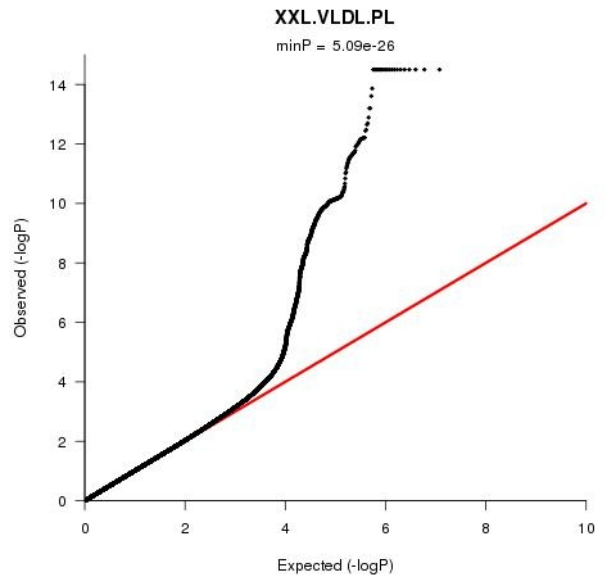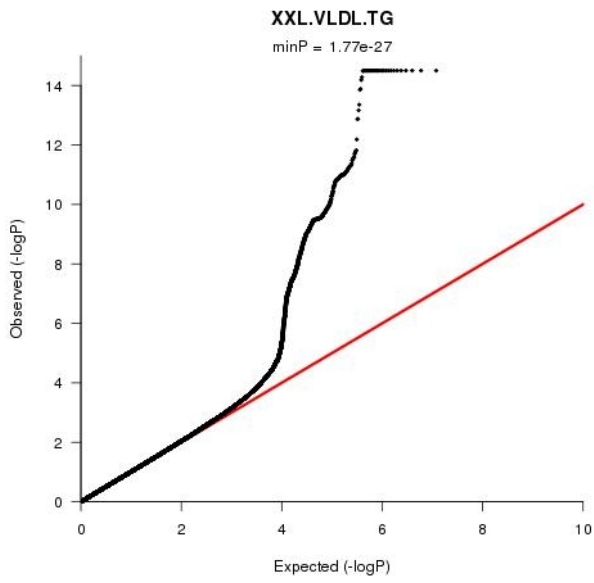



Supplementary Table 1. Metabolite abbreviations and names, number of individuals analyzed and proportion of variance explained.

| Abbreviation | Name                                                      | N     | Proportion of variance explained |
|--------------|-----------------------------------------------------------|-------|----------------------------------|
| AcAce        | Acetoacetate                                              | 19262 | 0.225 %                          |
| Ace          | Acetate                                                   | 24748 | NA                               |
| Ala          | Alanine                                                   | 24796 | 1.326 %                          |
| Alb          | Albumin                                                   | 18960 | 0.984 %                          |
| ApoA1        | ApoA1                                                     | 20687 | 5.005 %                          |
| ApoB         | ApoB                                                      | 20690 | 8.609 %                          |
| Bis.DB.ratio | Ratio of bis-allylic bonds to double bonds in lipids      | 13524 | 7.392 %                          |
| Bis.FA.ratio | Ratio of bis-allylic bonds to total fatty acids in lipids | 13171 | 6.324 %                          |
| bOHBut       | 3-hydroxybutyrate                                         | 24154 | NA                               |
| CH2.in.FA    | CH2 groups in fatty acids                                 | 19021 | 2.697 %                          |
| CH2.DB.ratio | CH2 groups to double bonds ratio                          | 13532 | 5.122 %                          |
| Cit          | Citrate                                                   | 24770 | 1.197 %                          |
| Crea         | Creatinine                                                | 24810 | 0.930 %                          |
| DB.in.FA     | Double bonds in fatty acids                               | 15728 | 3.066 %                          |
| DHA          | 22:6, docosahexaenoic acid (DHA)                          | 13499 | 1.677 %                          |
| Est.C        | Esterified cholesterol                                    | 13497 | 7.582 %                          |
| FALen        | Fatty acid length                                         | 13476 | NA                               |
| FAw3         | Omega-3 fatty acids                                       | 13544 | 2.873 %                          |
| FAw6         | Omega-6 fatty acids                                       | 13506 | 5.036 %                          |
| FAw79S       | Omega-7 and -9 and saturated fatty acids                  | 13506 | 2.500 %                          |
| Free.C       | Free cholesterol                                          | 13497 | 8.347 %                          |
| Glc          | Glucose                                                   | 24679 | 1.182 %                          |
| Gln          | Glutamine                                                 | 24462 | 1.772 %                          |
| GloI         | Glycerol                                                  | 20235 | NA                               |
| Gly          | Glycine                                                   | 18734 | 12.488 %                         |
| Gp           | Glycoprotein acetyls, mainly a1-acid glycoprotein         | 19270 | 2.410 %                          |
| HDL.C        | Total cholesterol in HDL                                  | 21555 | 6.115 %                          |
| HDL.D        | HDL diameter                                              | 19273 | 10.323 %                         |
| His          | Histidine                                                 | 19244 | 1.108 %                          |
| IDL.C        | Total cholesterol in IDL                                  | 19273 | 10.892 %                         |
| IDL.FC       | Free cholesterol in IDL                                   | 21559 | 10.894 %                         |
| IDL.L        | Total lipids in IDL                                       | 19273 | 11.267 %                         |
| IDL.P        | Concentration of IDL particles                            | 19273 | 11.173 %                         |
| IDL.PL       | Phospholipids in IDL                                      | 21559 | 11.205 %                         |
| IDL.TG       | Triglycerides in IDL                                      | 19273 | 9.943 %                          |
| Ile          | Isoleucine                                                | 24776 | 0.557 %                          |
| L.HDL.C      | Total cholesterol in large HDL                            | 21558 | 8.227 %                          |
| L.HDL.CE     | Cholesterol esters in large HDL                           | 19273 | 8.386 %                          |
| L.HDL.FC     | Free cholesterol in large HDL                             | 21559 | 7.686 %                          |
| L.HDL.L      | Total lipids in large HDL                                 | 19273 | 8.425 %                          |
| L.HDL.P      | Concentration of large HDL particles                      | 19273 | 8.436 %                          |
| L.HDL.PL     | Phospholipids in large HDL                                | 19273 | 8.030 %                          |
| L.LDL.C      | Total cholesterol in large LDL                            | 21552 | 10.442 %                         |
| L.LDL.CE     | Cholesterol esters in large LDL                           | 19273 | 10.559 %                         |
| L.LDL.FC     | Free cholesterol in large LDL                             | 21555 | 11.078 %                         |
| L.LDL.L      | Total lipids in large LDL                                 | 19273 | 10.715 %                         |
| L.LDL.P      | Concentration of large LDL particles                      | 19273 | 11.131 %                         |
| L.LDL.PL     | Phospholipids in large LDL                                | 21550 | 10.506 %                         |
| L.VLDL.C     | Total cholesterol in large VLDL                           | 21235 | 3.239 %                          |
| L.VLDL.CE    | Cholesterol esters in large VLDL                          | 18960 | 3.391 %                          |
| L.VLDL.FC    | Free cholesterol in large VLDL                            | 21238 | 2.907 %                          |
| L.VLDL.L     | Total lipids in large VLDL                                | 18960 | 2.441 %                          |
| L.VLDL.P     | Concentration of large VLDL particles                     | 18960 | 2.841 %                          |
| L.VLDL.PL    | Phospholipids in large VLDL                               | 21239 | 2.393 %                          |
| L.VLDL.TG    | Triglycerides in large VLDL                               | 21239 | 2.586 %                          |
| LA           | 18:2, linoleic acid (LA)                                  | 13527 | 6.584 %                          |
| Lac          | Lactate                                                   | 24871 | NA                               |
| LDL.C        | Total cholesterol in LDL                                  | 21559 | 10.720 %                         |
| LDL.D        | LDL diameter                                              | 19273 | 3.124 %                          |
| Leu          | Leucine                                                   | 24728 | 0.797 %                          |
| M.HDL.C      | Total cholesterol in medium HDL                           | 21558 | 2.378 %                          |
| M.HDL.CE     | Cholesterol esters in medium HDL                          | 19273 | 2.066 %                          |
| M.HDL.FC     | Free cholesterol in medium HDL                            | 21559 | 2.380 %                          |
| M.HDL.L      | Total lipids in medium HDL                                | 19273 | 1.764 %                          |
| M.HDL.P      | Concentration of medium HDL particles                     | 19273 | 1.537 %                          |

|             |                                                                  |       |          |
|-------------|------------------------------------------------------------------|-------|----------|
| M.HDL.PL    | Phospholipids in medium HDL                                      | 21558 | 1.901 %  |
| M.LDL.C     | Total cholesterol in medium LDL                                  | 21559 | 9.903 %  |
| M.LDL.CE    | Cholesterol esters in medium LDL                                 | 19273 | 10.090 % |
| M.LDL.L     | Total lipids in medium LDL                                       | 19273 | 9.933 %  |
| M.LDL.P     | Concentration of medium LDL particles                            | 19273 | 9.708 %  |
| M.LDL.PL    | Phospholipids in medium LDL                                      | 21558 | 8.684 %  |
| M.VLDL.C    | Total cholesterol in medium VLDL                                 | 21551 | 5.119 %  |
| M.VLDL.CE   | Cholesterol esters in medium VLDL                                | 19273 | 5.926 %  |
| M.VLDL.FC   | Free cholesterol in medium VLDL                                  | 21240 | 4.285 %  |
| M.VLDL.L    | Total lipids in medium VLDL                                      | 19273 | 3.649 %  |
| M.VLDL.P    | Concentration of medium VLDL particles                           | 19273 | 3.387 %  |
| M.VLDL.PL   | Phospholipids in medium VLDL                                     | 21240 | 4.283 %  |
| M.VLDL.TG   | Triglycerides in medium VLDL                                     | 21241 | 3.190 %  |
| MUFA        | Mono-unsaturated fatty acids                                     | 13535 | 2.067 %  |
| otPUFA      | Other polyunsaturated fatty acids than 18:2                      | 13549 | 10.162 % |
| PC          | Phosphatidylcholine and other cholines                           | 13542 | 4.258 %  |
| Phe         | Phenylalanine                                                    | 22663 | 1.105 %  |
| Pyr         | Pyruvate                                                         | 24756 | 0.523 %  |
| S.HDL.L     | Total lipids in small HDL                                        | 19273 | 3.063 %  |
| S.HDL.P     | Concentration of small HDL particles                             | 19273 | 2.494 %  |
| S.HDL.TG    | Triglycerides in small HDL                                       | 21558 | 4.242 %  |
| S.LDL.C     | Total cholesterol in small LDL                                   | 21556 | 8.964 %  |
| S.LDL.L     | Total lipids in small LDL                                        | 19273 | 8.689 %  |
| S.LDL.P     | Concentration of small LDL particles                             | 19273 | 8.504 %  |
| S.VLDL.C    | Total cholesterol in small VLDL                                  | 21557 | 6.716 %  |
| S.VLDL.FC   | Free cholesterol in small VLDL                                   | 21559 | 6.426 %  |
| S.VLDL.L    | Total lipids in small VLDL                                       | 19273 | 6.258 %  |
| S.VLDL.P    | Concentration of small VLDL particles                            | 19273 | 5.495 %  |
| S.VLDL.PL   | Phospholipids in small VLDL                                      | 21551 | 6.322 %  |
| S.VLDL.TG   | Triglycerides in small VLDL                                      | 21558 | 4.910 %  |
| Serum.C     | Serum total cholesterol                                          | 21491 | 8.671 %  |
| Serum.TG    | Serum total triglycerides                                        | 21545 | 4.331 %  |
| SM          | Sphingomyelins                                                   | 13476 | 3.918 %  |
| Tot.FA      | Total fatty acids                                                | 13505 | 3.346 %  |
| TotPG       | Total phosphoglycerides                                          | 13519 | 4.242 %  |
| Tyr         | Tyrosine                                                         | 24925 | 0.444 %  |
| Urea        | Urea                                                             | 18814 | NA       |
| Val         | Valine                                                           | 24900 | 1.008 %  |
| VLDL.D      | VLDL diameter                                                    | 19273 | 4.652 %  |
| XL.HDL.C    | Total cholesterol in very large HDL                              | 21540 | 5.051 %  |
| XL.HDL.CE   | Cholesterol esters in very large HDL                             | 19273 | 5.174 %  |
| XL.HDL.FC   | Free cholesterol in very large HDL                               | 21542 | 6.875 %  |
| XL.HDL.L    | Total lipids in very large HDL                                   | 19273 | 7.718 %  |
| XL.HDL.P    | Concentration of very large HDL particles                        | 19273 | 7.258 %  |
| XL.HDL.PL   | Phospholipids in very large HDL                                  | 19273 | 9.376 %  |
| XL.HDL.TG   | Triglycerides in very large HDL                                  | 21536 | 10.760 % |
| XL.VLDL.L   | Total lipids in very large VLDL                                  | 19273 | 2.047 %  |
| XL.VLDL.P   | Concentration of very large VLDL particles                       | 18960 | 2.009 %  |
| XL.VLDL.PL  | Phospholipids in very large VLDL                                 | 21237 | 2.109 %  |
| XL.VLDL.TG  | Triglycerides in very large VLDL                                 | 21548 | 2.409 %  |
| XS.VLDL.L   | Total lipids in very small VLDL                                  | 19273 | 9.862 %  |
| XS.VLDL.P   | Concentration of very small VLDL particles                       | 19273 | 9.447 %  |
| XS.VLDL.PL  | Phospholipids in very small VLDL                                 | 19273 | 10.552 % |
| XS.VLDL.TG  | Triglycerides in very small VLDL                                 | 19273 | 7.125 %  |
| XXL.VLDL.L  | Total lipids in chylomicrons and extremely large VLDL            | 18960 | 1.567 %  |
| XXL.VLDL.P  | Concentration of chylomicrons and extremely large VLDL particles | 18960 | 1.401 %  |
| XXL.VLDL.PL | Phospholipids in chylomicrons and extremely large VLDL           | 21542 | 1.572 %  |
| XXL.VLDL.TG | Triglycerides in chylomicrons and extremely large VLDL           | 21540 | 1.710 %  |

NA Those metabolic measures where no genome-wide associations were found

Supplementary Table 2. Genotyping details, genotype quality control and metabolomics measurement details.

| Study                                  | Short name                         | COROGENE                                                                                      | EGCUT                                                        | ERF                                              | FR97                                                                                    | GenMets                                                                                 | HBCS                                                                                    | KORA-F4                                                                                 | LLS                                                                                     | NFBC 1966                               | NTR                                                                                           | Predict CVD                                                                                                                                                                                                                                                                              | Prote                                                                                   | Twins                                                        | YFS                                                                                     |
|----------------------------------------|------------------------------------|-----------------------------------------------------------------------------------------------|--------------------------------------------------------------|--------------------------------------------------|-----------------------------------------------------------------------------------------|-----------------------------------------------------------------------------------------|-----------------------------------------------------------------------------------------|-----------------------------------------------------------------------------------------|-----------------------------------------------------------------------------------------|-----------------------------------------|-----------------------------------------------------------------------------------------------|------------------------------------------------------------------------------------------------------------------------------------------------------------------------------------------------------------------------------------------------------------------------------------------|-----------------------------------------------------------------------------------------|--------------------------------------------------------------|-----------------------------------------------------------------------------------------|
|                                        | <b>Full name</b>                   | Genetic Predisposition of Coronary Heart Disease in Patients Verified with Coronary Angiogram | Estonian Genome Center, University of Tartu                  | Erasmus Rucphen Family Study                     | FINRISK 1997                                                                            | Genetics of metabolic syndrome                                                          | Helsinki birth cohort study                                                             | kooperative gesundheitsforschung in der region augsburg                                 | Leiden Longevity Study                                                                  | Norther Finland Birth Cohort Study 1966 | Netherlands Twin Register                                                                     | Predict CVD                                                                                                                                                                                                                                                                              | EGCUT 2nd cohort                                                                        | Finnish Twin Cohort                                          | The Cardiovascular Risk in Young Finns Study                                            |
| <b>Study design</b>                    |                                    | Case-control study, only controls used                                                        | Population-based cohort                                      | Family-based                                     | Population-based cohort                                                                 | Case-control study                                                                      | Birth cohort                                                                            | Population based cohort                                                                 | Family-based                                                                            | Birth cohort                            | Population based twin study                                                                   | Cohort study                                                                                                                                                                                                                                                                             | Population-based                                                                        | Population based twin study                                  | Follow up study in children                                                             |
| <b>Ethnicity</b>                       |                                    | Finnish                                                                                       | Estonian                                                     | Dutch                                            | Finnish                                                                                 | Finnish                                                                                 | Finnish                                                                                 | German                                                                                  | Dutch                                                                                   | Finnish                                 | Dutch                                                                                         | Finnish                                                                                                                                                                                                                                                                                  | Estonian                                                                                | Finnish                                                      | Finnish                                                                                 |
| <b>Total genotyped sample size (N)</b> |                                    | 4122                                                                                          | 7734                                                         | 2917                                             | 5288                                                                                    | 2118                                                                                    | 1676                                                                                    | 1996                                                                                    | 2415                                                                                    | 5104                                    | 14003                                                                                         | 1881                                                                                                                                                                                                                                                                                     | 1397                                                                                    | 664                                                          | 2443                                                                                    |
| <b>Sample QC</b>                       | <b>Call rate*</b>                  | ≥ 95%                                                                                         | ≥95%                                                         | ≥ 95%                                            | ≥ 95%                                                                                   | ≥ 95%                                                                                   | ≥ 95%                                                                                   | ≥ 95%                                                                                   | ≥ 95%                                                                                   | ≥ 95%                                   | SNP missing rate < 10% in subsets                                                             | ≥ 95%                                                                                                                                                                                                                                                                                    | ≥95%                                                                                    | ≥ 95%                                                        | ≥ 95%                                                                                   |
|                                        | <b>other exclusions</b>            | IBD > 0.1, sex mismatches, duplicates, heterozygosity outliers by eye from distribution       | Additional exclusions: IBD > 0.1, sex mismatches, duplicates | Mendelian inconsistencies                        | IBD > 0.1, sex mismatches, duplicates, heterozygosity outliers by eye from distribution | IBD > 0.1, sex mismatches, duplicates, heterozygosity outliers by eye from distribution | IBD > 0.1, sex mismatches, duplicates, heterozygosity outliers by eye from distribution | IBD > 0.1, sex mismatches, duplicates, heterozygosity outliers by eye from distribution | IBD > 0.1, sex mismatches, duplicates, heterozygosity outliers by eye from distribution | Relatedness, Mendelian inconsistencies  | IBD > 0.1, sex mismatches, duplicates, heterozygosity outliers by eye from distribution       | Heterozygosity F < -0.10 or > 0.10; mismatch between X-chromosomal genotype and phenotypic sex; failure of expected IBS / IBD relations between samples; Mendel errors > 2%; different DNA for the same sample or between confirmed MZ co-twins over merged SNP genotype-imputed subsets | IBD > 0.1, sex mismatches, duplicates, heterozygosity outliers by eye from distribution | Additional exclusions: IBD > 0.1, sex mismatches, duplicates | IBD > 0.1, sex mismatches, duplicates, heterozygosity outliers by eye from distribution |
| <b>Assesment NMR</b>                   | <b>Machine</b>                     | 500 MHz Bruker AVANCE III spectrometer                                                        | 500 MHz Bruker AVANCE III spectrometer                       | 600 MHz Bruker AVANCE II spectrometer            | 500 MHz Bruker AVANCE III spectrometer                                                  | 500 MHz Bruker AVANCE III spectrometer                                                  | 500 MHz Bruker AVANCE III spectrometer                                                  | 500 MHz Bruker AVANCE III spectrometer                                                  | 600 MHz Bruker AVANCE II spectrometer                                                   | 500 MHz Bruker AVANCE III spectrometer  | 600 MHz Bruker AVANCE II spectrometer                                                         | 500 MHz Bruker AVANCE III spectrometer                                                                                                                                                                                                                                                   | 500 MHz Bruker AVANCE III spectrometer                                                  | 500 MHz Bruker AVANCE III spectrometer                       | 500 MHz Bruker AVANCE III spectrometer                                                  |
|                                        | <b>Sample material</b>             | Serum                                                                                         | Plasma                                                       | Serum                                            | Serum                                                                                   | Serum                                                                                   | Serum                                                                                   | Serum                                                                                   | Plasma                                                                                  | Serum                                   | Plasma                                                                                        | Serum                                                                                                                                                                                                                                                                                    | Plasma                                                                                  | Serum                                                        | Serum                                                                                   |
|                                        | <b>Processing</b>                  | In-house algorithm                                                                            | In-house algorithm                                           | In-house deconvolution algorithm                 | In-house algorithm                                                                      | In-house algorithm                                                                      | In-house algorithm                                                                      | In-house algorithm                                                                      | In-house deconvolution algorithm                                                        | In-house algorithm                      | In-house deconvolution algorithm                                                              | In-house algorithm                                                                                                                                                                                                                                                                       | In-house algorithm                                                                      | In-house algorithm                                           | In-house algorithm                                                                      |
| <b>Genotyping</b>                      |                                    | illumina 610k                                                                                 | illumina HumanOmniE xpress, illumina HumanCNV370             | illumina 318K, illumina 370K and Affymetrix 250K | illumina core-exome                                                                     | illumina 610k                                                                           | illumina 670k                                                                           | Affymetrix 6.0                                                                          | illumina Human660W, illumina OmniExpress                                                | illumina 370k                           | Perlegen-Affymetrix 500K; illumina 660K; illumina 370K; Affymetrix 6.0 907K; illumina Omni 1M | illumina omni express                                                                                                                                                                                                                                                                    | illumina HumanOmniExpress, illumina HumanCNV370                                         | illumina 670k                                                | illumina 670k                                                                           |
|                                        | <b>Genotype calling algorithm</b>  | illumina                                                                                      | Genome Studio                                                | illumina Bead Studio, BRLMM                      | illumina                                                                                | illumina                                                                                | illumina                                                                                | Birdseed2                                                                               | GenomeStudio                                                                            | illumina                                | Genotyper, Beadstudio, Birdseed                                                               | illumina                                                                                                                                                                                                                                                                                 | Genome Studio                                                                           | illumina                                                     | illumina                                                                                |
|                                        | <b>MAF</b>                         | ≥ 1%                                                                                          | ≥ 1%                                                         | ≥ 1%                                             | ≥ 1%                                                                                    | ≥ 1%                                                                                    | ≥ 1%                                                                                    | ≥ 1%                                                                                    | ≥ 1%                                                                                    | ≥ 1%                                    | > 1%                                                                                          | ≥ 1%                                                                                                                                                                                                                                                                                     | ≥ 1%                                                                                    | ≥ 1%                                                         | ≥ 1%                                                                                    |
|                                        | <b>Call rate*</b>                  | ≥ 95%                                                                                         | ≥ 95%                                                        | ≥ 98%                                            | ≥ 95%                                                                                   | ≥ 95%                                                                                   | ≥ 95%                                                                                   | ≥ 95%                                                                                   | ≥ 95%                                                                                   | ≥ 95%                                   | ≥ 95%                                                                                         | > 0.95                                                                                                                                                                                                                                                                                   | ≥ 95%                                                                                   | ≥ 95%                                                        | ≥ 95%                                                                                   |
| <b>p for HWE</b>                       | > 10 <sup>-6</sup>                 | > 10 <sup>-6</sup>                                                                            | > 10 <sup>-6</sup>                                           | > 10 <sup>-6</sup>                               | > 10 <sup>-6</sup>                                                                      | > 10 <sup>-6</sup>                                                                      | > 10 <sup>-6</sup>                                                                      | > 10 <sup>-7</sup>                                                                      | > 10 <sup>-4</sup>                                                                      | > 10 <sup>-6</sup>                      | > 1E-05                                                                                       | > 10 <sup>-6</sup>                                                                                                                                                                                                                                                                       | > 10 <sup>-6</sup>                                                                      | > 10 <sup>-6</sup>                                           | > 10 <sup>-6</sup>                                                                      |
| <b>SNPs that met QC criteria</b>       | 554988                             | 38.02 M in final list                                                                         | 659174                                                       | 273113                                           | 555388                                                                                  | 546814                                                                                  | 692637                                                                                  | 522801-645804                                                                           | 335118                                                                                  | 289598-1139672                          | 645088                                                                                        | 38.02 M in final list                                                                                                                                                                                                                                                                    | 552894                                                                                  | 546677                                                       |                                                                                         |
| <b>Imputation software</b>             | IMPUTE2                            | IMPUTE2                                                                                       | Mach/Minimac                                                 | IMPUTE2                                          | IMPUTE2                                                                                 | IMPUTE2                                                                                 | IMPUTE2                                                                                 | IMPUTE version 2.2 (beta)                                                               | IMPUTE2                                                                                 | Mach phasing, Minimac Imputation        | IMPUTE2                                                                                       | IMPUTE2                                                                                                                                                                                                                                                                                  | IMPUTE2                                                                                 | IMPUTE2                                                      | IMPUTE2                                                                                 |
| <b>Association analyses</b>            | <b>Analysis software</b>           | SNPTest 2.4.1                                                                                 | SNPTest 2.4.1                                                | ProbABEL                                         | SNPTest 2.4.1                                                                           | SNPTest 2.4.1                                                                           | SNPTest 2.4.1                                                                           | SNPTEST                                                                                 | QT-assoc                                                                                | SNPTest 2.4.1                           | PLINK 1.07                                                                                    | SNPTest 2.4.1                                                                                                                                                                                                                                                                            | SNPTest 2.4.1                                                                           | GEMMA                                                        | SNPTest 2.4.1                                                                           |
|                                        | <b>Cohort specific adjustments</b> |                                                                                               |                                                              | Family structure                                 |                                                                                         |                                                                                         |                                                                                         |                                                                                         | Familial relations                                                                      |                                         | Relatedness, genotyping sample                                                                |                                                                                                                                                                                                                                                                                          |                                                                                         | Family structure                                             |                                                                                         |

Supplementary Table 3. Conditional variants

Round 1: conditioned with the lead variant in the locus given in Tables 2 and 3

| Phenotype | rsid        | Chromosome | Position | Beta       | SE         | p-value   |
|-----------|-------------|------------|----------|------------|------------|-----------|
| L.LDL.FC  | rs11591147  | 1          | 55505647 | -0.5335034 | 0.03230012 | 2.76E-61  |
| L.LDL.FC  | rs13011615  | 2          | 21274167 | -0.1247424 | 0.01401459 | 5.54E-19  |
| Val       | rs34226052  | 4          | 89163523 | -0.0967459 | 0.01401841 | 5.15E-12  |
| HDL.C     | rs75835816  | 8          | 19885513 | -0.279236  | 0.0368885  | 3.74E-14  |
| His       | rs2072510   | 12         | 96403199 | -0.0689075 | 0.01048573 | 4.98E-11  |
| XL.HDL.TG | rs261334    | 15         | 58726744 | -0.2686627 | 0.0112669  | 1.13E-125 |
| HDL.C     | rs11076175  | 16         | 57006378 | -0.1511545 | 0.0135707  | 8.17E-29  |
| otPUFA    | rs190121281 | 19         | 19252779 | -0.3228719 | 0.03264413 | 4.57E-23  |
| S.HDL.L   | rs6032614   | 20         | 44609595 | -0.1017956 | 0.01388914 | 2.32E-13  |

Round 2: conditioned with the lead variant in the locus given in Tables 2 and 3 as well as round 1 variant above

| Phenotype  | rsid        | Chromosome | Position | Beta       | SE         | p-value  |
|------------|-------------|------------|----------|------------|------------|----------|
| XS.VLDL.TG | chr2.211488 | 2          | 21148888 | -0.1263201 | 0.01389021 | 9.53E-20 |
| XL.HDL.TG  | rs56050415  | 15         | 58574966 | -0.1198553 | 0.01366415 | 1.76E-18 |

Round 3: conditioned with the lead variant in the locus given in Tables 2 and 3 as well as round 1 and 2 variants above

| Phenotype | rsid        | Chromosome | Position | Beta       | SE         | p-value  |
|-----------|-------------|------------|----------|------------|------------|----------|
| HDL.D     | chr15.58927 | 15         | 58927492 | -0.1706685 | 0.02565108 | 2.86E-11 |

**Supplementary Table 4.** Previously identified loci and SNPs significant in this GWAS. Beta refers to one copy addition of the effect allele in standard deviation units. Metabolic traits are grouped coarsely by phenotypic similarity.

| Lipoprotein measures                 |                    |     |           |        |      |       |      |                       |                       |           |                |                            |                   |
|--------------------------------------|--------------------|-----|-----------|--------|------|-------|------|-----------------------|-----------------------|-----------|----------------|----------------------------|-------------------|
| Trait                                | Variant identifier | Chr | Position  | ea/nea | Eaf  | Beta  | SE   | P-value               | Q P-value             | N samples | Candidate gene | eQTL                       | Function          |
| L.LDL.FC                             | rs191448950        | 1   | 55584844  | A/G    | 0.02 | -0.5  | 0.03 | 4.8×10 <sup>-28</sup> | 0.31                  | 21549     | PCSK9          | ---                        | Intron;USP24      |
| L.LDL.FC                             | chr1:10981815      | 1   | 109818158 | T/C    | 0.78 | -0.14 | 0.01 | 1.0×10 <sup>-27</sup> | 0.15                  | 19265     | SORT1          | CELSR2                     | 5'UTR;TFBS;CELSR2 |
| XL.HDL.PL                            | rs4503368          | 1   | 161190250 | C/T    | 0.53 | -0.07 | 0.01 | 3.2×10 <sup>-31</sup> | 0.34                  | 19270     | USF1           | ---                        | ---               |
| M.HDL.FC                             | rs590820           | 1   | 230309619 | G/A    | 0.44 | -0.06 | 0.01 | 1.6×10 <sup>-3</sup>  | 0.2                   | 21553     | GALNT2         | ---                        | Intron            |
| IDL.FC                               | rs952275           | 2   | 21221399  | G/T    | 0.43 | 0.11  | 0.01 | 1.5×10 <sup>-23</sup> | 0.18                  | 21556     | APOB           | ---                        | TFBS              |
| LDL.C                                | rs756629#          | 2   | 44065090  | A/G    | 0.08 | -0.14 | 0.02 | 1.2×10 <sup>-14</sup> | 0.15                  | 21559     | ABCG5          | ---                        | Missense          |
| S.LDL.C                              | rs4703667          | 5   | 74613906  | C/G    | 0.39 | 0.09  | 0.01 | 2.6×10 <sup>-14</sup> | 0.76                  | 21551     | HMGCR          | ---                        | ---               |
| VLDL.D                               | rs10455872         | 6   | 161010118 | G/A    | 0.04 | -0.2  | 0.03 | 1.3×10 <sup>-23</sup> | 0.03                  | 19272     | LPA            | ---                        | Intron            |
| L.LDL.PL                             | rs73066442         | 7   | 21592973  | G/A    | 0.25 | 0.08  | 0.01 | 9.7×10 <sup>-11</sup> | 0.71                  | 21546     | DNAH1          | DNAH1                      | Intron            |
| VLDL.D                               | rs17145750         | 7   | 73026378  | T/C    | 0.15 | -0.13 | 0.01 | 4.3×10 <sup>-20</sup> | 0.5                   | 19268     | MLXIPL         | MLXIPL                     | Intron            |
| S.VLDL.TG                            | rs115849089        | 8   | 19912370  | A/G    | 0.11 | -0.18 | 0.02 | 1.6×10 <sup>-23</sup> | 0.4                   | 21554     | LPL            | ---                        | ---               |
| XS.VLDL.TG                           | rs2954029          | 8   | 126490972 | T/A    | 0.48 | -0.09 | 0.01 | 2.8×10 <sup>-10</sup> | 0.051                 | 19270     | TRIB1          | ---                        | ---               |
| XL.HDL.FC                            | rs686030           | 9   | 15304782  | A/C    | 0.87 | 0.09  | 0.01 | 2.0×10 <sup>-10</sup> | 0.91                  | 21541     | TTC39B         | ---                        | TFBS              |
| XL.HDL.C                             | rs2575876          | 9   | 107665739 | A/C    | 0.19 | -0.1  | 0.01 | 2.7×10 <sup>-11</sup> | 0.16                  | 21540     | ABCA1          | ---                        | TFBS/Intron       |
| IDL.L                                | chr9:13614970      | 9   | 136149709 | A/AC   | 0.19 | 0.09  | 0.01 | 1.0×10 <sup>-11</sup> | 0.068                 | 19269     | ABO            | ---                        | Intron            |
| S.VLDL.TG                            | rs964184           | 11  | 116648917 | C/G    | 0.86 | -0.24 | 0.01 | 7.6×10 <sup>-10</sup> | 4.0×10 <sup>-10</sup> | 21556     | ZNF259         | ---                        | TFBS              |
| HDL.D                                | rs67053123         | 12  | 125353810 | A/T    | 0.15 | 0.11  | 0.01 | 9.8×10 <sup>-11</sup> | 0.67                  | 19270     | SCARB1         | ---                        | TFBS              |
| XL.HDL.TG                            | rs1532085          | 15  | 58683366  | G/A    | 0.6  | -0.26 | 0.01 | 9.2×10 <sup>-15</sup> | 0.59                  | 21536     | LIPC           | ---                        | ---               |
| HDL.C                                | rs247617           | 16  | 56990716  | A/C    | 0.3  | 0.23  | 0.01 | 5.8×10 <sup>-10</sup> | 0.26                  | 21550     | CETP           | ---                        | TFBS              |
| HDL.D                                | rs6507939          | 18  | 47176261  | C/A    | 0.84 | 0.11  | 0.01 | 8.3×10 <sup>-10</sup> | 0.46                  | 19268     | LIPG           | ---                        | ---               |
| VLDL.D                               | rs116843064#       | 19  | 8429323   | A/G    | 0.03 | -0.22 | 0.03 | 2.8×10 <sup>-10</sup> | 0.016                 | 19268     | ANGPTL4        | ---                        | Missense          |
| L.LDL.FC                             | rs142130958        | 19  | 11190652  | A/G    | 0.11 | -0.24 | 0.02 | 6.8×10 <sup>-11</sup> | 0.11                  | 21554     | LDLR           | ---                        | ---               |
| M.VLDL.C                             | rs72999033         | 19  | 19366632  | T/C    | 0.06 | -0.18 | 0.02 | 1.0×10 <sup>-11</sup> | 0.6                   | 21548     | CILP           | ---                        | TFBS;UTR;HAPLN4   |
| L.LDL.FC                             | rs7412             | 19  | 45412079  | T/C    | 0.06 | -0.59 | 0.03 | 2.0×10 <sup>-12</sup> | 0.15                  | 18263     | APOE           | ---                        | Missense          |
| XS.VLDL.PL                           | rs1883711          | 20  | 39179822  | C/G    | 0.06 | 0.17  | 0.02 | 2.3×10 <sup>-11</sup> | 0.16                  | 19268     | MAFB           | ---                        | TFBS              |
| S.HDL.P                              | rs6073958          | 20  | 44551855  | C/T    | 0.2  | 0.2   | 0.01 | 2.6×10 <sup>-2</sup>  | 0.35                  | 19269     | PLTP           | ---                        | ---               |
| Lipid measures                       |                    |     |           |        |      |       |      |                       |                       |           |                |                            |                   |
| Serum.TG                             | rs1168041          | 1   | 62960250  | C/T    | 0.72 | 0.1   | 0.01 | 3.4×10 <sup>-17</sup> | 0.62                  | 21539     | ANGPTL3        | ---                        | Intron;DOCK7      |
| otPUFA                               | rs174547           | 11  | 61570783  | C/T    | 0.4  | -0.4  | 0.01 | 6.8×10 <sup>-23</sup> | 3.8×10 <sup>-10</sup> | 13547     | EADS1          | EADS2                      | Intron            |
| Bis.DB.ratio                         | rs11644601         | 16  | 15172118  | C/T    | 0.28 | 0.1   | 0.01 | 7.7×10 <sup>-11</sup> | 0.16                  | 13517     | PDX1           | NPIPAS                     | Intron            |
| Sphingomyelin                        | rs181807530        | 17  | 4774814   | G/C    | 0.04 | -0.37 | 0.04 | 5.4×10 <sup>-25</sup> | 0.25                  | 11439     | MINK1          | ---                        | Intron            |
| Small molecules and protein measures |                    |     |           |        |      |       |      |                       |                       |           |                |                            |                   |
| Alanine                              | rs1260326#         | 2   | 27730940  | C/T    | 0.64 | -0.1  | 0.01 | 7.4×10 <sup>-20</sup> | 0.19                  | 22569     | GCKR           | ---                        | Missense          |
| Valine                               | rs10211524         | 2   | 65208074  | A/G    | 0.41 | 0.09  | 0.01 | 5.2×10 <sup>-20</sup> | 0.1                   | 24898     | SLC1A4         | ---                        | ---               |
| Glucose                              | rs560887           | 2   | 169763148 | C/T    | 0.7  | 0.12  | 0.01 | 3.4×10 <sup>-11</sup> | 0.0016                | 22452     | G6PC2          | ---                        | Intron            |
| Glycine                              | rs1047891#         | 2   | 211540507 | A/C    | 0.33 | 0.49  | 0.01 | <1×10 <sup>-30</sup>  | 5.3×10 <sup>-10</sup> | 18730     | CPS1           | ---                        | Missense          |
| Albumin                              | rs184650103        | 4   | 74850649  | T/C    | 0.01 | -0.6  | 0.05 | 1.2×10 <sup>-10</sup> | 0.23                  | 17461     | ALB            | ---                        | TFBS              |
| Creatinine                           | rs1986734          | 4   | 77420787  | T/C    | 0.56 | 0.06  | 0.01 | 3.0×10 <sup>-10</sup> | 0.62                  | 21918     | SHROOM3        | ---                        | TFBS              |
| Valine                               | rs9637599          | 4   | 89206230  | C/A    | 0.47 | 0.11  | 0.01 | 1.7×10 <sup>-11</sup> | 0.12                  | 24899     | PPMIK          | lincRNA                    | TFBS              |
| Histidine                            | rs3733402#         | 4   | 187158034 | A/G    | 0.57 | 0.08  | 0.01 | 9.1×10 <sup>-11</sup> | 0.013                 | 19241     | KLKB1          | ---                        | Missense          |
| Citrate                              | rs2921604          | 5   | 14867948  | C/T    | 0.44 | 0.1   | 0.01 | 3.7×10 <sup>-23</sup> | 0.43                  | 24765     | ANKH           | ANKH                       | Intron            |
| Phenylalanine                        | rs2731672          | 5   | 176842474 | C/T    | 0.74 | 0.09  | 0.01 | 3.9×10 <sup>-16</sup> | 4.0×10 <sup>-10</sup> | 20436     | FI2            | LMAN2                      | ---               |
| Tyrosine                             | rs14399            | 6   | 111543944 | A/C    | 0.39 | -0.1  | 0.01 | 1.4×10 <sup>-23</sup> | 0.086                 | 24918     | SLC16A10       | ---                        | 3'UTR             |
| Glucose                              | rs878521           | 7   | 44255643  | A/G    | 0.22 | 0.09  | 0.01 | 8.0×10 <sup>-11</sup> | 0.016                 | 21020     | GCK            | ---                        | TFBS              |
| Creatinine                           | rs10265221         | 7   | 151414329 | C/T    | 0.24 | 0.07  | 0.01 | 7.5×10 <sup>-11</sup> | 0.32                  | 24805     | PRKAG2         | ---                        | Intron            |
| Glycine                              | rs2169387          | 8   | 9181395   | G/A    | 0.87 | -0.13 | 0.02 | 1.3×10 <sup>-10</sup> | 0.99                  | 18729     | PPP1R3B        | Processed pseudogene       | ---               |
| Glutamine                            | rs7078003          | 10  | 99359412  | T/C    | 0.2  | 0.07  | 0.01 | 3.0×10 <sup>-10</sup> | 0.014                 | 24459     | HOGA1          | ---                        | Intron;3'UTR      |
| Glucose                              | rs10466351         | 11  | 92697981  | T/C    | 0.38 | 0.07  | 0.01 | 3.3×10 <sup>-11</sup> | 0.042                 | 24676     | MTNR1B         | ---                        | ---               |
| Glutamine                            | rs2657879#         | 12  | 56865338  | G/A    | 0.18 | -0.22 | 0.01 | 3.3×10 <sup>-20</sup> | 0.11                  | 24458     | GLS2           | ---                        | Missense          |
| Phenylalanine                        | rs1718309          | 12  | 103242396 | G/A    | 0.6  | -0.08 | 0.01 | 2.5×10 <sup>-13</sup> | 0.07                  | 22660     | PAH            | ---                        | Intron            |
| Glycoprotein acetyls                 | rs28929474#        | 14  | 94844947  | T/C    | 0.02 | -0.29 | 0.04 | 2.7×10 <sup>-11</sup> | 0.17                  | 19267     | SERPINA1       | ---                        | Missense          |
| Creatinine                           | rs61524473         | 15  | 45646283  | C/T    | 0.26 | 0.09  | 0.01 | 1.2×10 <sup>-11</sup> | 0.51                  | 24805     | GATM           | GATM, SPATS1, LOC101928414 | ---               |
| Glycoprotein acetyls                 | rs77303550         | 16  | 72079657  | T/C    | 0.19 | 0.15  | 0.01 | 4.0×10 <sup>-10</sup> | 0.86                  | 19267     | HP             | ---                        | Intron;TXNL4B     |
| Citrate                              | rs172642           | 17  | 6595398   | C/A    | 0.48 | 0.08  | 0.01 | 4.8×10 <sup>-10</sup> | 0.5                   | 24767     | SLC13A5        | DVL2                       | Intron            |
| Citrate                              | rs2079742          | 17  | 59465697  | T/C    | 0.18 | 0.1   | 0.01 | 8.6×10 <sup>-11</sup> | 0.46                  | 22575     | BCAS3          | ---                        | Intron            |
| Citrate                              | rs2040771          | 22  | 19161935  | C/T    | 0.48 | -0.09 | 0.01 | 1.3×10 <sup>-23</sup> | 0.36                  | 24769     | SLC25A1        | SLC25A1                    | TFBS              |

In lipoprotein abbreviations, first is given the size category if applicable: XL=extra large, L=large, M=medium, S=small and XS=extra small. Then the lipoprotein particle is given: VLDL=very-low-density lipoprotein particle, IDL=intermediate-density lipoprotein particle, LDL=low-density lipoprotein particles and HDL=high-density lipoprotein particle and finally the lipid measure of the particle: C=total cholesterol, D=the mean diameter of the particle, FC=free cholesterol, L=total lipids, P=particle concentration, PL=phospholipids, TG=triglycerides. In lipids and small molecules: Bis.DB.ratio = Ratio of bis-allylic bonds to double bonds in lipids, otPUFA= Other polyunsaturated fatty acids than 18:2, ea= effect allele, nea=non-effect allele, Eaf=effect allele frequency, Beta=effect estimate, SE=standard error, eQTL=expression quantitative trait locus from GTEx, # = missense variant. TFBS: transcription factor binding site and Q: Heterogeneity statistics. If the SNP is located in an intron of a different gene than the candidate, then the gene is presented in the Function column after semicolon. Full list of abbreviations can be found from **Supplementary Table 1**

Supplementary Table 5. GTEx eQTLs

| Tissue                     | SNP            | Ensembl Gene ID | Gene type            | UniProt Gene Name | beta        | t-stat     | p-value    | FDR        | pheno        | chromosome | rs_number   | position  | gene     | novelty | function      | MAF      |         |
|----------------------------|----------------|-----------------|----------------------|-------------------|-------------|------------|------------|------------|--------------|------------|-------------|-----------|----------|---------|---------------|----------|---------|
| Muscle_skeletal            | chr1:109818158 | ENSG00000143126 | protein_coding       | CELSR2            | -0.4642675  | -5.624193  | 1.29E-07   | 0.000128   | L LDLFC      | 1          | chr1:109818 | 109818158 | SORT1    | old     | TFBS_ins      | 0.215503 |         |
| Heart_Left_Ventricle       | rs9637599      | ENSG00000246375 | lincRNA              |                   | 0.92322468  | 9.58844052 | 7.38E-14   | 1.43E-10   | Val          | 4          | rs9637599   | 89206230  | PPMIK    | old     | TFBS          | 0.46958  |         |
| Heart_Left_Ventricle       | rs9637599      | ENSG00000207480 | misc_RNA             |                   | 0.62357991  | 5.83989089 | 2.07E-07   | 0.00020037 | Val          | 4          | rs9637599   | 89206230  | PPMIK    | old     | TFBS          | 0.46958  |         |
| Thyroid                    | rs9637599      | ENSG00000246375 | lincRNA              |                   | 0.101929118 | 0.56862444 | 4.95380022 | 3.72E-06   | 0.00140644   | Val        | 4           | rs9637599 | 89206230 | PPMIK   | old           | TFBS     | 0.46958 |
| Artery_Tibial              | rs9637599      | ENSG00000246375 | lincRNA              |                   | 0.6217407   | 6.17461482 | 1.82E-08   | 1.33E-05   | Val          | 4          | rs9637599   | 89206230  | PPMIK    | old     | TFBS          | 0.46958  |         |
| Nerve_Tibial               | rs9637599      | ENSG00000246375 | lincRNA              |                   | 0.10211658  | 10.7500861 | 3.16E-16   | 6.81E-13   | Val          | 4          | rs9637599   | 89206230  | PPMIK    | old     | TFBS          | 0.46958  |         |
| Nerve_Tibial               | rs9637599      | ENSG00000207480 | misc_RNA             |                   | 0.57966837  | 4.98798945 | 4.58E-06   | 0.00197816 | Val          | 4          | rs9637599   | 89206230  | PPMIK    | old     | TFBS          | 0.46958  |         |
| Whole_blood                | rs2921604      | ENSG00000154122 | protein_coding       | ANKH              | -0.2541829  | -4.280844  | 3.51E-05   | 0.01774489 | Cit          | 5          | rs2921604   | 14867948  | ANKH     | old     | intron        | 0.444373 |         |
| Heart_Left_Ventricle       | rs2731672      | ENSG00000169223 | protein_coding       | LMAN2             | 0.25785696  | 4.18379027 | 9.19E-05   | 0.02537323 | Phe          | 5          | rs2731672   | 176842474 | FI2      | old     | NA            | 0.259219 |         |
| Thyroid                    | rs73066442     | ENSG00000105877 | protein_coding       | DNAH11            | -0.8147978  | -6.2407472 | 1.70E-08   | 1.28E-05   | L LDLPL      | 7          | rs73066442  | 21592973  | DNAH11   | old     | intron        | 0.245779 |         |
| Heart_Left_Ventricle       | rs17145750     | ENSG00000009950 | protein_coding       | MLXIPL            | 0.79120012  | 5.97243976 | 0.00018794 | 0.04036603 | VLDLD        | 7          | rs17145750  | 73026378  | MLXIPL   | old     | intron        | 0.148692 |         |
| Thyroid                    | rs17145750     | ENSG00000009950 | protein_coding       | MLXIPL            | 1.0881624   | 6.86526984 | 1.07E-09   | 1.21E-06   | VLDLD        | 7          | rs17145750  | 73026378  | MLXIPL   | old     | intron        | 0.148692 |         |
| Skin_sun_exposed_lower_leg | rs17145750     | ENSG00000009950 | protein_coding       | MLXIPL            | 0.77159537  | 4.99376257 | 3.75E-06   | 0.00412804 | VLDLD        | 7          | rs17145750  | 73026378  | MLXIPL   | old     | intron        | 0.148692 |         |
| Thyroid                    | rs2169387      | ENSG00000253697 | processed_pseudogene |                   | -0.484505   | -5.2509556 | 1.12E-06   | 0.00050933 | Gly          | 8          | rs2169387   | 9181395   | PPP1R3B  | old     | NA            | 0.13332  |         |
| Heart_Left_Ventricle       | rs174547       | ENSG00000134824 | protein_coding       | FADS2             | 0.63735921  | 5.51966948 | 7.09E-07   | 0.00045697 | otPUFA       | 11         | rs174547    | 61570783  | FADS1    | old     | Intron-FADS1  | 0.402707 |         |
| Heart_Left_Ventricle       | rs174547       | ENSG00000256443 | lincRNA              |                   | 0.60464182  | 4.25482322 | 7.20E-05   | 0.02318245 | otPUFA       | 11         | rs174547    | 61570783  | FADS1    | old     | Intron-FADS1  | 0.402707 |         |
| Muscle_skeletal            | rs174547       | ENSG00000134824 | protein_coding       | FADS2             | 0.3522459   | 4.66225052 | 8.36E-06   | 0.00331788 | otPUFA       | 11         | rs174547    | 61570783  | FADS1    | old     | Intron-FADS1  | 0.402707 |         |
| Nerve_Tibial               | rs174547       | ENSG00000134824 | protein_coding       | FADS2             | 0.49602567  | 4.93549184 | 5.58E-06   | 0.00200845 | otPUFA       | 11         | rs174547    | 61570783  | FADS1    | old     | Intron-FADS1  | 0.402707 |         |
| Whole_blood                | rs174547       | ENSG00000134824 | protein_coding       | FADS2             | 0.5078831   | 6.33037234 | 3.36E-09   | 6.80E-06   | otPUFA       | 11         | rs174547    | 61570783  | FADS1    | old     | Intron-FADS1  | 0.402707 |         |
| Heart_Left_Ventricle       | rs7954638      | ENSG00000139344 | protein_coding       | AMDHD1            | 0.5876378   | 4.1401397  | 0.0010668  | 0.02577536 | His          | 12         | rs7954638   | 96314795  | HAL      | new     | intron-CCDC38 | 0.482356 |         |
| Thyroid                    | rs7954638      | ENSG00000139344 | protein_coding       | AMDHD1            | 0.55002097  | 4.52452761 | 1.97E-05   | 0.00640156 | His          | 12         | rs7954638   | 96314795  | HAL      | new     | intron-CCDC38 | 0.482356 |         |
| Artery_Tibial              | rs7954638      | ENSG00000139344 | protein_coding       | AMDHD1            | 0.48807644  | 4.28572368 | 4.52E-05   | 0.01558644 | His          | 12         | rs7954638   | 96314795  | HAL      | new     | intron-CCDC38 | 0.482356 |         |
| Muscle_skeletal            | rs7954638      | ENSG00000139344 | protein_coding       | AMDHD1            | 0.73453433  | 7.84045274 | 2.31E-12   | 4.58E-09   | His          | 12         | rs7954638   | 96314795  | HAL      | new     | intron-CCDC38 | 0.482356 |         |
| Heart_Left_Ventricle       | rs61524473     | ENSG00000259520 | antisense            | LOC101928414      | -0.731142   | -4.7842257 | 1.10E-05   | 0.00531813 | Crea         | 15         | rs61524473  | 45646283  | GATM     | old     | NA            | 0.272263 |         |
| Thyroid                    | rs61524473     | ENSG00000259520 | antisense            | LOC101928414      | -0.853445   | -7.8694479 | 1.11E-11   | 2.51E-08   | Crea         | 15         | rs61524473  | 45646283  | GATM     | old     | NA            | 0.272263 |         |
| Thyroid                    | rs61524473     | ENSG00000171763 | protein_coding       | SPATASL1          | 0.57982168  | 4.46326719 | 2.49E-05   | 0.00706289 | Crea         | 15         | rs61524473  | 45646283  | GATM     | old     | NA            | 0.272263 |         |
| Artery_Tibial              | rs61524473     | ENSG00000259520 | antisense            | LOC101928414      | -0.6890699  | -6.1617995 | 1.93E-08   | 1.33E-05   | Crea         | 15         | rs61524473  | 45646283  | GATM     | old     | NA            | 0.272263 |         |
| Artery_Tibial              | rs61524473     | ENSG00000259433 | processed_pseudogene |                   | -0.494388   | -4.8112902 | 5.92E-06   | 0.00306431 | Crea         | 15         | rs61524473  | 45646283  | GATM     | old     | NA            | 0.272263 |         |
| Artery_Tibial              | rs61524473     | ENSG00000171763 | protein_coding       | SPATASL1          | 0.4543552   | 4.62624266 | 1.23E-05   | 0.00508763 | Crea         | 15         | rs61524473  | 45646283  | GATM     | old     | NA            | 0.272263 |         |
| Lung                       | rs61524473     | ENSG00000259520 | antisense            | LOC101928414      | -0.6693657  | -6.0209232 | 3.02E-08   | 6.74E-05   | Crea         | 15         | rs61524473  | 45646283  | GATM     | old     | NA            | 0.272263 |         |
| Muscle_skeletal            | rs61524473     | ENSG00000171766 | protein_coding       | GATM              | 0.44907279  | 5.00640568 | 1.98E-06   | 0.00130904 | Crea         | 15         | rs61524473  | 45646283  | GATM     | old     | NA            | 0.272263 |         |
| Muscle_skeletal            | rs61524473     | ENSG00000259520 | antisense            | LOC101928414      | -0.5024898  | -4.9373017 | 2.66E-06   | 0.00131758 | Crea         | 15         | rs61524473  | 45646283  | GATM     | old     | NA            | 0.272263 |         |
| Nerve_Tibial               | rs61524473     | ENSG00000259520 | antisense            | LOC101928414      | -0.7743297  | -6.3368806 | 2.28E-08   | 2.46E-05   | Crea         | 15         | rs61524473  | 45646283  | GATM     | old     | NA            | 0.272263 |         |
| Nerve_Tibial               | rs61524473     | ENSG00000259433 | processed_pseudogene |                   | -0.6584493  | -5.5152584 | 6.04E-07   | 0.00043483 | Crea         | 15         | rs61524473  | 45646283  | GATM     | old     | NA            | 0.272263 |         |
| Whole_blood                | rs61524473     | ENSG00000171763 | protein_coding       | SPATASL1          | 0.37890372  | 5.87204221 | 3.18E-08   | 3.21E-05   | Crea         | 15         | rs61524473  | 45646283  | GATM     | old     | NA            | 0.272263 |         |
| Skin_sun_exposed_lower_leg | rs11644601     | ENSG00000183793 | protein_coding       | NIP1AS            | 0.50805101  | 4.72138515 | 1.07E-05   | 0.00782577 | Bis,DB,ratio | 16         | rs11644601  | 15172118  | PDXC1    | old     | intron        | 0.272797 |         |
| Muscle_skeletal            | rs10083777     | ENSG00000166454 | protein_coding       | ATMIN             | 0.37275208  | 4.38231689 | 2.58E-05   | 0.00851883 | Gly          | 16         | rs10083777  | 81065282  | GCSH     | new     | TFBS          | 0.172891 |         |
| Nerve_Tibial               | rs10083777     | ENSG00000140905 | protein_coding       | GCSH              | -0.6454039  | -4.6893123 | 1.39E-05   | 0.00429704 | Gly          | 16         | rs10083777  | 81065282  | GCSH     | new     | TFBS          | 0.172891 |         |
| Whole_blood                | rs10083777     | ENSG00000261061 | sense_intronic       | LOC102724325      | -0.4315857  | -4.022807  | 9.53E-05   | 0.03856528 | Gly          | 16         | rs10083777  | 81065282  | GCSH     | new     | TFBS          | 0.172891 |         |
| Skin_sun_exposed_lower_leg | rs172642       | ENSG00000004975 | protein_coding       | DVL2              | -0.3277284  | -4.331814  | 4.52E-05   | 0.02491013 | Cit          | 17         | rs172642    | 6959398   | SLC13A5  | new     | intron        | 0.480953 |         |
| Heart_Left_Ventricle       | rs2040771      | ENSG00000100075 | protein_coding       | SLC25A1           | -0.3678193  | -4.3533879 | 5.11E-05   | 0.01975487 | Cit          | 22         | rs2040771   | 19161935  | SLC25A1  | old     | TFBS          | 0.476266 |         |
| Thyroid                    | rs2040771      | ENSG00000100075 | protein_coding       | SLC25A1           | -0.5097302  | -5.5108741 | 3.84E-07   | 0.00021771 | Cit          | 22         | rs2040771   | 19161935  | SLC25A1  | old     | TFBS          | 0.476266 |         |
| Artery_Tibial              | rs2040771      | ENSG00000100075 | protein_coding       | SLC25A1           | -0.4771556  | -6.5316593 | 3.65E-09   | 7.56E-06   | Cit          | 22         | rs2040771   | 19161935  | SLC25A1  | old     | TFBS          | 0.476266 |         |
| Lung                       | rs2040771      | ENSG00000100075 | protein_coding       | SLC25A1           | -0.3534833  | -5.3593401 | 5.55E-07   | 0.00061845 | Cit          | 22         | rs2040771   | 19161935  | SLC25A1  | old     | TFBS          | 0.476266 |         |
| Nerve_Tibial               | rs2040771      | ENSG00000100075 | protein_coding       | SLC25A1           | -0.5105157  | -5.1753537 | 2.25E-06   | 0.00121393 | Cit          | 22         | rs2040771   | 19161935  | SLC25A1  | old     | TFBS          | 0.476266 |         |
| Skin_sun_exposed_lower_leg | rs2040771      | ENSG00000100075 | protein_coding       | SLC25A1           | -0.4374226  | -5.4723843 | 5.63E-07   | 0.00124038 | Cit          | 22         | rs2040771   | 19161935  | SLC25A1  | old     | TFBS          | 0.476266 |         |
| Whole_blood                | rs2040771      | ENSG00000100075 | protein_coding       | SLC25A1           | -0.1892798  | -5.1889422 | 7.58E-07   | 0.00051143 | Cit          | 22         | rs2040771   | 19161935  | SLC25A1  | old     | TFBS          | 0.476266 |         |

Supplementary Table 6. Genetic risk score for Lp(a)

log(LPA) SNP associations in FINRISK97

| ID          | NEA | EA | Estimate   | SE         | P         |
|-------------|-----|----|------------|------------|-----------|
| rs10455872  | A   | G  | 1.29083958 | 0.03524657 | 7.66E-260 |
| rs112092923 | A   | G  | 0.39071088 | 0.04693155 | 1.08E-16  |
| rs117052562 | G   | A  | 0.57207416 | 0.04576285 | 2.53E-35  |
| rs11756060  | C   | T  | 0.316227   | 0.03716715 | 2.32E-17  |
| rs117898561 | T   | A  | 0.40094462 | 0.0577513  | 4.35E-12  |
| rs190981730 | G   | A  | 0.75985504 | 0.07922578 | 1.35E-21  |
| rs192776464 | G   | A  | -0.5744705 | 0.04947457 | 9.07E-31  |
| rs200319086 | TA  | T  | -0.1480954 | 0.01382495 | 1.75E-26  |
| rs201673688 | G   | GA | 0.21289994 | 0.02607088 | 4.01E-16  |
| rs2504921   | T   | G  | -0.2855298 | 0.0141451  | 4.09E-87  |
| rs41266385  | A   | C  | 0.5008693  | 0.03393023 | 2.76E-48  |
| rs41267809  | A   | G  | -0.3995413 | 0.04080005 | 1.94E-22  |
| rs56393506  | C   | T  | 0.45768525 | 0.02010824 | 4.12E-109 |
| rs71033586  | AC  | A  | 2.32579404 | 0.06692013 | 7.87E-237 |
| rs783147    | G   | A  | -0.1803628 | 0.01403455 | 3.34E-37  |
| rs79018195  | T   | C  | 1.48259637 | 0.10269944 | 2.68E-46  |
| rs79601080  | A   | G  | -0.6400112 | 0.0758658  | 4.27E-17  |
| rs9355839   | G   | A  | 0.22495482 | 0.02378786 | 4.79E-21  |
| Sex         |     |    | 0.14549432 | 0.01666602 | 3.44E-18  |
| Age         |     |    | 0.00313083 | 0.00063022 | 7.00E-07  |

EA Effect allele  
 NEA Non-effect allele  
 SE Standard error  
 P P-value

log(LPA) SNP associations in YFS

| ID          | Estimate   | SE         | P        |
|-------------|------------|------------|----------|
| rs10455872  | 1.0902468  | 0.08211059 | 1.27E-38 |
| rs112092923 | 0.67176931 | 0.10657425 | 3.57E-10 |
| rs117052562 | 0.93784151 | 0.09257205 | 1.47E-23 |
| rs11756060  | 0.3144094  | 0.07943694 | 7.82E-05 |
| rs117898561 | 0.61401742 | 0.13035034 | 2.64E-06 |
| rs190981730 | 0.7208449  | 0.19191886 | 1.78E-04 |
| rs192776464 | -1.0936299 | 0.10528971 | 1.19E-24 |
| rs200319086 | -0.2222792 | 0.02979609 | 1.28E-13 |
| rs201673688 | 0.32991772 | 0.05630624 | 5.42E-09 |
| rs2504921   | -0.4711327 | 0.0298661  | 1.53E-43 |
| rs41266385  | 1.01076523 | 0.07129889 | 2.54E-09 |
| rs41267809  | -0.723179  | 0.12080486 | 8.06E-80 |
| rs56393506  | 0.83603685 | 0.04222552 | 3.21E-73 |
| rs71033586  | 2.59944904 | 0.13776413 | 7.67E-29 |
| rs783147    | -0.3016177 | 0.02899995 | 2.39E-13 |
| rs79018195  | 1.78164975 | 0.15738207 | 3.46E-07 |
| rs79601080  | -1.1458333 | 0.1553635  | 6.26E-53 |
| rs9355839   | 0.25186722 | 0.04925064 | 1.04E-24 |
| Sex         | -0.0123919 | 0.03570944 | 7.29E-01 |
| Age         | 0.00254736 | 0.00355268 | 4.73E-01 |

**Supplementary Table 7.** For the Dutch NMR method the most representative chemical shift values for the metabolic measures in the NMR spectra are shown (many metabolites have a complicated signal with components at multiple chemical shift locations). The representative coefficients of variation (in percent) are calculated for each metabolic measure based on 174 repeated quality control serum samples that are processed identically with the actual study samples; distributed randomly among the boxes represent the averaged situation for the total 7628 samples analysed.

Method Used  
for: ERF,  
NTR, LLS

| Measure                                         | CS / ppm | CV / % |
|-------------------------------------------------|----------|--------|
| Leucine                                         | 0.95     | 3.91   |
| Isoleucine                                      | 1.00     | 4.45   |
| Valine                                          | 1.03     | 3.96   |
| 3-Hydroxybutyrate                               | 1.19     | 6.49   |
| Lipids (CH <sub>2</sub> )                       | 1.27     | 6.17   |
| Alanine                                         | 1.47     | 4.38   |
| Acetate                                         | 1.91     | 8.26   |
| Pyruvate / Oxaloacetate                         | 2.36     | 5.52   |
| Glutamine                                       | 2.47     | 11.00  |
| Citrate                                         | 2.53     | 5.88   |
| Glycine                                         | 3.55     | 5.97   |
| Glycerol                                        | 3.56     | 18.67  |
| Creatinine                                      | 4.05     | 5.08   |
| Lactate                                         | 4.10     | 4.68   |
| Glucose                                         | 5.23     | 3.33   |
| Lipids (CH=CH*CH <sub>2</sub> CH <sub>2</sub> ) | 5.30     | 12.01  |
| Tyrosine                                        | 6.89     | 6.41   |
| Phenylalanine                                   | 7.42     | 10.53  |



## Supplementary Note 1: Sample descriptions

### 1. FINRISK

FINRISK surveys are cross-sectional, population-based studies conducted every five years since 1972 to monitor the risk of chronic diseases. For each survey, a representative random sample was selected from 25- to 74-year-old inhabitants of different regions in Finland. The survey included a questionnaire and a clinical examination, at which a blood sample was drawn, with linkage to national registers of cardiovascular and other health outcomes. The study protocol has been described elsewhere<sup>1</sup>. Study participants were followed up through December 31, 2012. The current study included eligible individuals from FINRISK surveys conducted in 1992, 1997, 2002, and 2007 (total n=27 838). FINRISK samples were genotyped in three separate batches: DILGOM, PredictCVD and FINRISK. All three batches were analyzed separately to avoid batch effects and meta-analyzed.

### 2. Helsinki Birth Cohort Study (HBCS)

The primary aim of the Helsinki Birth Cohort Study was to assess how growth and environmental factors acting during the fetal period and childhood are related to health in adult life. A particular focus has been the study of the early life origins of cardiovascular disease and its risk factors. Participants were born between 1934 and 1944 in Helsinki. An essential component of the project was a detailed clinical examination of over 2500 volunteers, parts of which provided data included in this study<sup>2</sup>.

### 3. Health2000 GenMets Study (GenMets)

The GenMets sample has been described in detail previously by Perttilä et al.<sup>3</sup>. Individuals in GenMets are metabolic syndrome cases and matched controls drawn from the Finnish Health2000 study; a population health survey. Persons with known diabetes were excluded. Participants included in the present study had participated in an additional survey, which included drawing fasting serum samples.

### 4. Northern Finland Birth Cohort 1966 (NFBC1966)

The NFBC1966 has been described in detail previously by Rantakallio<sup>4</sup>. The original study design focused on factors affecting pre-term birth, low birth weight, and subsequent morbidity and mortality. Mothers living in the two northern-most provinces of Finland were invited to participate if they had expected delivery dates during 1966. Individuals still living in the Helsinki area or Northern Finland (N = 5923) were asked at age 31 to participate in a detailed biological and medical examination as well as a questionnaire.

### 5. Cardiovascular Risk in Young Finns Study (YF)

The Cardiovascular Risk in Young Finns Study (YF) is a population based prospective cohort study. It was conducted at five medical schools in Finland (Turku, Helsinki, Kuopio, Tampere and Oulu), with the aim of studying the levels of cardiovascular risk factors in children and adolescents in different parts of the country. The latest follow-up was conducted in 2007. The serum samples for this metabolomics study were collected at this latest follow up. The study and data collection protocols have been described in detail by Raitakari et al.<sup>5</sup>.

### 6. Finnish twin cohort

Individuals in this study were derived from the FinnTwin12 (FT12) and FinnTwin16 (FT16) cohort studies. In brief, the FT12 is a population-based cohort longitudinal study of five consecutive birth cohorts of Finnish twins born between 1983 and 1987. All twins (and their parents) were initially contacted and invited to participate by mail in the autumn of the year in which their birth cohort

reached 11 years of age. Subsequent follow-up assessments were made when the twins were aged 14, 17 and ~22 years. The FT16 is a population-based longitudinal study of five consecutive birth cohorts of Finnish twins born between 1975 and 1979. Each pair was initially approached and invited to participate by mail in the 1-2 months following the twins' 16th birthday. The baseline data collection started in 1991 and was completed in 1996, with participation of 2733 twin pairs (response rate ~ 88%). Subsequent follow-up assessments were made when the twins were 17, 18.5, and ~25 years, following a similar approach. For both the FT12 and FT16, the baseline and follow-up assessments included surveys of health habits and attitudes, symptom checklists, personality scales, and social relationships<sup>6</sup>. In addition, blood samples were taken from all twins during a visit to the twin research clinic in Helsinki (Finland) at the last follow-up (young adulthood) for DNA and biochemistry analyses. Data collection and analysis were approved by the ethics committees of the Department of Public Health of the University of Helsinki, the Helsinki and Uusimaa Hospital District and the IRB of Indiana University. Written informed consent was obtained from all participating twins.

#### 7. ERF

The Erasmus Rucphen Family ([http://www.erasmusmc.nl/klinische\\_genetica/research/intro/genepi/](http://www.erasmusmc.nl/klinische_genetica/research/intro/genepi/)) genetic isolate study is a family based study in a genetically isolated population in the Southwest of the Netherlands. This young genetic isolate was founded in the mid - 18th century and minimal immigration and marriages have occurred between surrounding settlements due to social and religious reasons. The ERF population includes 3,465 individuals that are living descendants of 22 couples with at least six children baptized<sup>7</sup>. The study protocol was approved by the medical ethics board of the Erasmus MC Rotterdam, the Netherlands.

#### 8. EGCUT

The Estonian Biobank is the population-based biobank of the Estonian Genome Center of the University of Tartu (EGCUT). The project is conducted according to the Estonian Gene Research Act and all participants have signed broad informed consent<sup>8</sup>. The cohort size is currently 51535 people aged 18 years and older. All subjects are volunteers and were recruited randomly by general practitioners (GP) and physicians in hospitals. A Computer Assisted Personal Interview is conducted at the doctor's office to record personal data (place of birth, place(s) of living, nationality etc.), genealogical data (family history spanning four generations), educational and occupational history, lifestyle data (physical activity, dietary habits - FFQ, smoking, alcohol consumption, women's health, quality of life). Metabolite concentrations (over 110; NMR and MS) are available for about 12000 subjects; metabolic follow-up has been conducted for more than 2000 donors. The EGCUT database has been linked with the national registries and hospital databases for obtaining up-to-date phenotypic information. Medical history and current health status are recorded according to the ICD-10, medication according to the ATC. Anthropometric measurements, blood pressure (sitting position at the end of the interview), and resting heart rate are measured; 30-50 mL of venous blood are collected into EDTA Vacutainers. These are transported to the central laboratory of the EGCUT at +4...+6 C (in 6 to 36h) where DNA, plasma and WBC are immediately isolated and kept in aliquots in MAPI straws in liquid N<sub>2</sub>. All procedures are run according to ISO 9000-2008 and LIMS.

#### 9. KORA

KORA (Cooperative Health Research in the Region of Augsburg; <http://www.helmholtz-muenchen.de/en/kora-en/kora-homepage/index.html>) exists since 1996 in the region of Augsburg in the southwest of Germany, and builds on the MONICA (Monitoring of trends and determinants in cardiovascular disease) project initiated in 1984<sup>9</sup>. KORA is a regional research platform for population-based surveys and a cohort of more than 18,000 subjects are actively followed up until

the present date. Four cross-sectional health surveys have been performed in five-year intervals, each containing independent random samples of residents in the city of Augsburg and the two adjacent counties in the age-range between 25 to 74 years at baseline examination. The study followed the recommendations of the Declaration of Helsinki and was approved by the local ethical committees and informed consent was given by all participants. Blood was drawn in the morning between 8 and 10am after a period of overnight fasting. Material was immediately horizontal shaken (10 min), followed by 40 min resting at 4°C to obtain complete coagulation. The material was then centrifuged (2000 × g; 4°C). Serum was aliquoted and stored for 2–4 hours at 4°C, after which it was deep frozen to -80°C until sampling.

## 10. LLS

In the Leiden Longevity Study (<http://www.molepi.nl/research/longevity>), nonagenarian sibling pairs were included when aged older than 89 years for men and 91 years for women. Additional inclusion criteria were that participants needed to have at least one sister or a brother fulfilling these age criteria, and who was also willing to participate<sup>10</sup>. Because proper controls are lacking at very high ages, the offspring of the nonagenarian siblings were asked to be included in the study as well. The partners thereof were included in the study to serve as a control group, representing the general population at an age comparable to the offspring. The total study population, excluding the nonagenarian siblings, consisted of 2,415 participants (1,671 offspring; 744 partners). The Medical Ethical Committee of the Leiden University Medical Centre approved the study and informed consent was obtained from all participants. Blood samples were taken at baseline for extraction of DNA and the determination of non-fasted serum parameters. For metabolomics measurements, blood was drawn using a safety lock butterfly needle. Within two hours tubes with clotted blood were centrifuged for 15 minutes at 2,800 x g and serum was obtained and divided into subsamples, snap-frozen and stored at -80° C.

## 11. NTR

The Netherlands Twin Register (NTR; <http://www.tweelingenregister.org/>) recruits twins and their family members to study the causes of individual differences in health, behavior and lifestyle. Participants are followed longitudinally; details about the cohort have been published previously<sup>11</sup>. A subsample of unselected twins and their family members has taken part in the NTR-Biobank project. Genotyping was performed on the Affymetrix 6.0 ( $N=298$ ), Affymetrix Perlegen 5.0 ( $N=3,697$ ), Illumina 370 ( $N=290$ ), Illumina 660 ( $N=1,439$ ) and Illumina Omni Express 1M ( $N=455$ ) platforms. Calls were made with the platform specific software (Genotyper, Beadstudio). Per platform the quality control thresholds for SNPs were minor allele frequency (MAF) > 1%, Hardy-Weinberg equilibrium (HWE)  $P$  value > 0.00001, call rate >95%, and  $0.30 < \text{heterozygosity} < 0.35$ . Samples were excluded from the data if their expected sex and identity by descent (IBD) status did not match, or if the genotype missing rate was above 10%. For each platform all SNPs were aligned to the positive strand of the Hapmap 2 Build 36 release 24 CEU reference set. The alignment was checked using individuals and family members tested on multiple platforms. SNPs were excluded per platform if allele frequencies differed more than 15% with the reference set and/or the other platforms. The data of the platforms were subsequently merged into a single dataset ( $N=5,856$ ). This merged set was imputed against the reference set using IMPUTE v2. After imputation, genotype dosage was calculated if the highest genotype probability was above 90%. Badly imputed SNPs were removed based on HWE  $P$  value < 0.00001, proper info < 0.40, MAF < 1%, allele frequency difference > 0.15 against reference. From the total set of 5,856 individuals with imputed GWA data, a subset of unrelated participants were included in the present study. For metabolomics measurements, blood was collected in the morning using a safety lock butterfly needle.

## Supplementary Note 2: Additional acknowledgements

The Estonian Genome Center of University of Tartu (EGCUT) received support from EU FP7 grant BBMRI-LPC 313010, targeted financing from Estonian Government IUT20-60, IUT24-6, Estonian Research Roadmap through the Estonian Ministry of Education and Research (3.2.0304.11-0312), Center of Excellence in Genomics (EXCEGEN), Development Fund from the University of Tartu (SP1GVARENG) and from an EFSD New Horizons grant. EGCUT thanks Viljo Soo Estonian Genome Center for his help on this project. This work was also supported by the US National Institute of Health [R01DK075787].

The Leiden Longevity Study (LLS) has received funding from the European Union's Seventh Framework Programme (FP7/2007-2011) under grant agreement n° 259679. This study was supported by a grant from the Innovation-Oriented Research Program on Genomics (SenterNovem IGE05007), the Centre for Medical Systems Biology, and the Netherlands Consortium for Healthy Ageing (grant 050-060-810), all in the framework of the Netherlands Genomics Initiative, Netherlands Organization for Scientific Research (NWO), Unilever Colworth and by BBMRI-NL, a Research Infrastructure financed by the Dutch government (NWO 184.021.007).

Netherlands Twin Registry (NTR) Research was funded by the Netherlands Organization for Scientific Research (NWO: MagW/ZonMW grants 904-61-090, 985-10-002, 904-61-193, 480-04-004, 400-05-717, Addiction-31160008 Middelgroot-911-09-032, Spinozapremie 56-464-14192), Center for Medical Systems Biology (CSMB, NWO Genomics), NBIC/BioAssist/RK(2008.024), Biobanking and Biomolecular Resources Research Infrastructure (BBMRI –NL, 184.021.007), the VU University's Institute for Health and Care Research (EMGO+ ), the European Community's Seventh Framework Program (FP7/2007-2013), ENGAGE (HEALTH-F4-2007-201413) and the European Science Council (ERC - 230374 and ERC-284167). HHMD is supported by an EMGO+ Fellowship as part of the Mental Health research program of the EMGO Institute for Health and

Care Research. NTR thanks all participants in the Netherlands Twin Register. This work was carried out on the Dutch national e-infrastructure with the support of SURF Foundation.

Erasmus Rucphen Family (ERF) was supported by the Consortium for Systems Biology (NCSB), both within the framework of the Netherlands Genomics Initiative (NGI)/Netherlands Organisation for Scientific Research (NWO). ERF study as a part of EUROSPAN (European Special Populations Research Network) was supported by European Commission FP6 STRP grant number 018947 (LSHG-CT-2006-01947) and also received funding from the European Community's Seventh Framework Programme (FP7/2007-2013)/grant agreement HEALTH-F4-2007-201413 by the European Commission under the programme "Quality of Life and Management of the Living Resources" of 5th Framework Programme (no. QLG2-CT-2002-01254) as well as FP7 project EUROHEADPAIN (nr 602633). High-throughput analysis of the ERF data was supported by joint grant from Netherlands Organisation for Scientific Research and the Russian Foundation for Basic Research (NWO-RFBR 047.017.043). Exome sequencing analysis in ERF was supported by the ZonMw grant (2010/31471/ZONMW). The funders had no role in study design, data collection and analysis, decision to publish, or preparation of the manuscripts. ERF study is grateful to all study participants and their relatives, general practitioners and neurologists for their contributions and to P. Veraart for her help in genealogy, J. Vergeer for the supervision of the laboratory work and P. Snijders for his help in data collection.

The Cardiovascular Risk in Young Finns Study (YFS) The Young Finns Study has been financially supported by the Academy of Finland: grants 134309 (Eye), 126925, 121584, 124282, 129378 (Salve), 117787 (Gendi), and 41071 (Skidi); the Social Insurance Institution of Finland; Kuopio, Tampere and Turku University Hospital Medical Funds (grant X51001 for T.L.); Juho Vainio Foundation; Paavo Nurmi Foundation; Finnish Foundation of Cardiovascular Research (T.L.);

Finnish Cultural Foundation; Tampere Tuberculosis Foundation (T.L.); Emil Aaltonen Foundation (T.L.); and Yrjö Jahnsson Foundation (T.L.).

*Helsinki Birth Cohort Study (HBCS)* has been supported by grants from the Academy of Finland (120386, 125876 and 126775 to J.E.), the Finnish Diabetes Research Society, the Novo Nordisk Foundation, the European Science Foundation (EuroSTRESS), the Wellcome Trust (89061/Z/09/Z and 089062/Z/09/Z), the Samfundet Folkhälsan and the Finska Läkaresällskapet.

*Northern Finland Birth Cohort 1966 (NFBC1966)* received financial support from the Academy of Finland (104781, 120315, 129269, 1114194, 139900 and SALVE to M.-R.J.) University Hospital Oulu, Biocenter, University of Oulu (75617 to M.-R.J. and M.S.), the European Commission EURO-BLCS Framework 5 award (QLG1-CT-2000-01643 to M.-R.J.), the US National Heart, Lung, and Blood Institute (NHLBI) (5R01HL087679), the US National Institute of Mental Health (NIMH) (1RL1MH083268), European Network for Genetic and Genomic Epidemiology (ENGAGE) (HEALTH-F4-2007-201413 to L.P. and M.-R.J.), the MRC UK (G0500539, G0600705 and PrevMetSyn/Salve to M.-R.J.) and the Wellcome Trust (GR069224).

*Finnish Twin Cohort Study* Data collection for FinnTwin12 and FinnTwin16 were supported by the National Institute on Alcohol Abuse and Alcoholism (NIAAA) (AA-12502, AA-09203 and AA-08315 to R.J.Rose) and the Academy of Finland (100499, 205585, 118555, 265240, 263278 and 141054 (Skidi-Kids) to J. Ka). L.H.B was supported by 1.3 milj. klubi-klubben. Genotyping was performed at the Wellcome Trust Sanger Institute.

*FINRISK* The FINRISK/DILGOM study was supported by the Academy of Finland (118081) and by the European Union Seventh Framework Programme (FP7/2007-2013) under grant agreement No. HEALTH-F2-2011-278913 (BiomarCaRE). Abbott Diagnostics provided test reagents for Lp(a). Academy of Finland supported V.S. (grant #139635), M.P. (grant #269517) and J.K. (grant #283045) and V.S. was supported by Finnish Foundation for Cardiovascular Research. M.P. was supported also through EU FP7 under grant agreements nr. 313010 (BBMRI-LPC), nr. 305280

(MIMOmics), and nr. 261433 (BioSHaRE-EU), the Yrjö Jahnsson Foundation and Juho Vainio Foundation.

KORA The KORA study was initiated and financed by the Helmholtz Zentrum München – German Research Center for Environmental Health, which is funded by the German Federal Ministry of Education and Research (BMBF) and by the State of Bavaria. Furthermore, KORA research was supported within the Munich Center of Health Sciences (MC-Health), Ludwig-Maximilians-Universität, as part of LMUinnovativ. This work was financed by the European Community's Seventh Framework Programme (FP7/2007-2013), ENGAGE project (HEALTH-F4-2007-201413), and the German National Genome Research Network (NGFN; NGFNPlus, project number 01GS0834). We thank Julia Scarpa and Katharina Sckell for metabolomics measurements performed at the Helmholtz Centrum München, Genome Analysis Center, Metabolomics Core Facility. Karsten Suhre is supported by Biomedical Research Program funds at Weill Cornell Medical College in Qatar, a program funded by the Qatar Foundation. Christian Gieger is supported by the European Union's Seventh Framework projects MIMOmics (FP7-Health-F5-2012-305280) and PAIN-OMICS (project nr. 602736), by the BMBF project e:AtheroSysMed (project nr.: 01ZX1313G) and by the Helmholtz-Russia joint research group HRJRG-310.

The quantitative NMR metabolomics platform and its development has been supported by the Academy of Finland, TEKES - the Finnish Funding Agency for Technology and Innovation, the Sigrid Juselius Foundation, the Novo Nordisk Foundation, the Finnish Diabetes Research Foundation, the Paavo Nurmi Foundation, and the strategic and infrastructural research funding from the University of Oulu, Finland, as well as by the British Heart Foundation, the Wellcome Trust, and the Medical Research Council, UK.

GTEEx: The Genotype-Tissue Expression (GTEEx) Project was supported by the Common Fund of the Office of the Director of the National Institutes of Health. Additional funds were provided by the NCI, NHGRI, NHLBI, NIDA, NIMH, and NINDS. Donors were enrolled at Biospecimen

Source Sites funded by NCI\SAIC-Frederick, Inc. (SAIC-F) subcontracts to the National Disease Research Interchange (10XS170), Roswell Park Cancer Institute (10XS171), and Science Care, Inc. (X10S172). The Laboratory, Data Analysis, and Coordinating Center (LDACC) was funded through a contract (HHSN268201000029C) to The Broad Institute, Inc. Biorepository operations were funded through an SAIC-F subcontract to Van Andel Institute (10ST1035). Additional data repository and project management were provided by SAIC-F (HHSN261200800001E). The Brain Bank was supported by a supplements to University of Miami grants DA006227 & DA033684 and to contract N01MH000028. Statistical Methods development grants were made to the University of Geneva (MH090941 & MH101814), the University of Chicago (MH090951, MH090937, MH101820, MH101825), the University of North Carolina - Chapel Hill (MH090936 & MH101819), Harvard University (MH090948), Stanford University (MH101782), Washington University St Louis (MH101810), and the University of Pennsylvania (MH101822). The data used for the analyses described in this manuscript were obtained from: the GTEx Portal on 12/01/2014 and/or dbGaP accession number phs000424.v3.p1 on 08/03/2013.

### Supplementary References

1. Vartiainen, E. et al. Thirty-five-year trends in cardiovascular risk factors in Finland. *Int J Epidemiol* **39**, 504-18 (2010).
2. Yliharsila, H. et al. Body mass index during childhood and adult body composition in men and women aged 56-70 y. *Am J Clin Nutr* **87**, 1769-75 (2008).
3. Perttila, J. et al. OSBPL10, a novel candidate gene for high triglyceride trait in dyslipidemic Finnish subjects, regulates cellular lipid metabolism. *J Mol Med (Berl)* **87**, 825-35 (2009).
4. Rantakallio, P. Groups at risk in low birth weight infants and perinatal mortality. *Acta Paediatr Scand* **193**, Suppl 193:1+ (1969).
5. Raitakari, O.T. et al. Cohort profile: the cardiovascular risk in Young Finns Study. *Int J Epidemiol* **37**, 1220-6 (2008).
6. Kaprio, J., Pulkkinen, L. & Rose, R.J. Genetic and environmental factors in health-related behaviors: studies on Finnish twins and twin families. *Twin Res* **5**, 366-71 (2002).
7. Aulchenko, Y.S. et al. Linkage disequilibrium in young genetically isolated Dutch population. *Eur J Hum Genet* **12**, 527-34 (2004).
8. Leitsalu, L. et al. Cohort Profile: Estonian Biobank of the Estonian Genome Center, University of Tartu. *Int J Epidemiol* (2014).



9. Holle, R., Happich, M., Lowel, H., Wichmann, H.E. & Group, M.K.S. KORA--a research platform for population based health research. *Gesundheitswesen* **67 Suppl 1**, S19-25 (2005).
10. Schoenmaker, M. et al. Evidence of genetic enrichment for exceptional survival using a family approach: the Leiden Longevity Study. *Eur J Hum Genet* **14**, 79-84 (2006).
11. Willemsen, G. et al. The Netherlands Twin Register biobank: a resource for genetic epidemiological studies. *Twin Res Hum Genet* **13**, 231-45 (2010).
